# Supplementary material for: Bacteriophages in Gut Microbiome Interactions in Patients with Inflammatory Bowel Disease: Differences by Sex and The Disease Type
Source: Research Square preprint supplement (doi:10.21203/rs.3.rs-1240997/v1), 2022-01-13
Supplement: Supplementary file 1 [file 47049fcd1499049d89f8cce0.xlsx]

## Sheet: Description
Description of the Supplementary Tables
Table S14:	Age-related microbes in males (females).
Table S15:	sex-linked microorganisms.
Table S16:	Age-independent microbes with different frequencies of two groups ( significantly in the mean frequency, p-value <0.05).
Table S17:	Microbes with different abundances of two groups ( significantly in the mean frequency ; p-value <0.05).
Table S18:	Abbreviations.

## Sheet: Table S14_Agedependent microbes
Table S14:	Age-related microbes of males (females).
Abbreviations : B, bacteria; F, fungus; V, virus(species).
													Age-dependent microbes
	Age-dependent microbes in males :						Age-dependent microbes in females :						for comparison of two groups		( males - females ) :
	B-59						F-1						B-247
	V-281						F-2						B-394
	V-395						B-47						V-106
	V-73						B-52						V-249
							B-62						V-326
							B-64						V-327
							B-69
							B-74
							B-247
							B-394
							B-395
							V-105
							V-106
							V-140
							V-189
							V-249
							V-278
							V-318
							V-326
							V-327

## Sheet: Table S15_Sexdependent microbes
Table S15:	Sex-linked microorganisms
		NONM - NONF
		F-4	B-52	V-105
			B-92	V-140
			B-95	V-146
			B-233	V-148
			B-257	V-194
			B-315	V-195
			B-325	V-252
			B-326	V-286
			B-343	V-318
			B-348	V-395
				V-398
				V-439
Abbreviations : B, bacteria; F, fungus; V(species), virus; NONM, the nonIBD group of males; NONF, the nonIBD group of females .

## Sheet: Table S16_ microbe counts
Table S16:	Age-independent microbes with different frequencies of two groups ( significantly in the mean frequency ; p-value <0.05).
Abbreviations : B, bacteria; F, fungus; V, virus(species); NONM, the nonIBD group of males; NONF, the nonIBD group of females.
UCM, the Ulcerative Colitis group of males ; CDM, the Crohn disease group of males; UCF, the Ulcerative Colitis group of females; CDF, the Crohn disease group of females.
Groups:	CDF-UCF				Groups:	CDM-CDF				Groups:	CDM-UCM				Groups:	CDF-NONF			Groups:	UCF-UCM			Groups:	NONF-UCF			Groups:	NONM-CDM				Groups:	NONM-UCM
	B-34	V-10			F-2	B-47	V-12			F-2	B-62	V-10			F-9	B-89	V-193		F-9	B-52	V-11		F-9	B-51	V-279		F-2	B-74	V-10				B-22	V-14
	B-55	V-195				B-67	V-13			F-9	B-79	V-12				B-224	V-247			B-74	V-107			B-289	V-287			B-76	V-12				B-79	V-16
	B-59	V-320				B-197	V-14				B-197	V-13				B-296	V-252			B-81	V-236			B-343	V-148			B-85	V-13				B-81	V-140
	B-67	V-328				B-224	V-16				B-199	V-17				B-314	V-324			B-84	V-389				V-252			B-92	V-14				B-143	V-236
	B-246	V-331				B-259	V-21				B-265	V-135				B-315	V-330			B-180	V-419				V-514			B-163	V-16				B-215	V-302
	B-289	V-389				B-275	V-33				B-322	V-148				B-333	V-334			B-246	V-567				V-195			B-322	V-21				B-305	V-419
	B-313	V-458				B-289	V-34				B-333	V-169					V-439			B-302					V-302			B-325	V-113				B-322	V-466
	B-315	V-541					V-41				B-346	V-173					V-543			B-315								B-326	V-135				B-326	V-567
	B-325	V-543					V-51				B-378	V-200								B-321									V-148
							V-67					V-221								B-369									V-169
							V-73					V-222								B-392									V-173
							V-112					V-236																	V-174
							V-135					V-363																	V-208
							V-147					V-460																	V-283
							V-169					V-471																	V-284
							V-172					V-541																	V-288
							V-173																						V-398
							V-174																						V-330
							V-193																						V-502
							V-197																						V-541
							V-217																						V-543
							V-246																						V-567
							V-252
							V-301
							V-316
							V-320
							V-330
							V-335
							V-337
							V-382
							V-458
							V-536
							V-543

## Sheet: Table S17_differently abundance
Table S17:	Microbes with different abundances of two groups ( significantly in the mean frequency ; p-value <0.05).
Abbreviations : B, bacteria; F, fungus; V, virus(species); NONM, the nonIBD group of males; NONF, the nonIBD group of females.
UCM, the Ulcerative Colitis group of males ; CDM, the Crohn disease group of males; UCF, the Ulcerative Colitis group of females; CDF, the Crohn disease group of females.
		*	, the microbe with lower frequency in Group I than Group II ( significantly in the mean frequency ; p-value <0.05).
		***	, the microbe with higher frequency in Group I than Group II ( significantly in the mean frequency ; p-value <0.05).
	Groups I & II :			Groups I & II :			Groups I & II :			Groups I & II :			Groups I & II :			Groups I & II :			Groups I & II :			Groups I & II :
	CDM-NONM			CDM-UCM			CDM-CDF			UCM-NONM			CDF-NONF			UCF-NONF			CDF-UCF			UCM-UCF
	B-74	*		B-62	*		B-47	*		B-79	*		B-224	*		B-51	*		B-246	*		B-52	*
	B-85	*		B-322	*		B-67	*		B-215	*		B-296	*		B-343	*		B-289	*		B-84	*
	B-92	*		F-9	*		B-275	*		B-305	*		B-314	*		V-148	*		B-315	*		B-246	*
	B-322	*		V-236	*		V-33	*		B-326	*		B-315	*		V-195	*		B-325	*		B-302	*
	B-325	*		B-79	***		V-543	*		V-419	*		V-193	*		V-252	*		V-320	*		B-315	*
	B-326	*		B-197	***		B-197	***		V-567	*		V-252	*		V-514	*		V-328	*		B-369	*
	V-113	*		B-199	***		B-224	***		B-22	***		V-324	*		B-289	***		V-458	*		B-392	*
	V-283	*		B-265	***		B-259	***		B-81	***		V-330	*		F-9	***		B-34	***		V-107	*
	V-284	*		B-333	***		B-289	***		B-143	***		V-334	*		V-279	***		B-55	***		V-419	*
	V-288	*		B-346	***		F-2	***		B-322	***		V-439	*		V-287	***		B-59	***		V-567	*
	V-398	*		B-378	***		V-12	***		V-14	***		B-89	***		V-302	***		B-67	***		B-74	***
	V-543	*		F-2	***		V-13	***		V-16	***		B-333	***					B-313	***		B-81	***
	V-567	*		V-10	***		V-14	***		V-140	***		F-9	***					V-10	***		B-180	***
	B-76	***		V-12	***		V-16	***		V-236	***		V-247	***					V-195	***		B-321	***
	B-163	***		V-13	***		V-21	***		V-302	***		V-543	***					V-331	***		F-9	***
	V-10	***		V-17	***		V-34	***		V-466	***								V-389	***		V-11	***
	V-12	***		V-135	***		V-41	***											V-541	***		V-236	***
	V-13	***		V-148	***		V-51	***											V-543	***		V-389	***
	V-14	***		V-169	***		V-67	***
	V-16	***		V-173	***		V-73	***
	V-21	***		V-200	***		V-112	***
	V-135	***		V-221	***		V-135	***
	V-148	***		V-222	***		V-147	***
	V-169	***		V-363	***		V-169	***
	V-173	***		V-460	***		V-172	***
	V-174	***		V-471	***		V-173	***
	V-208	***		V-541	***		V-174	***
	F-2	***					V-193	***
	V-330	***					V-197	***
	V-502	***					V-217	***
	V-541	***					V-246	***
							V-252	***
							V-301	***
							V-316	***
							V-320	***
							V-330	***
							V-335	***
							V-337	***
							V-382	***
							V-458	***
							V-536	***

## Sheet: Table S18_ Abbreviations
Table S18:	Abbreviations.
Abbreviations : B, bacteria; F, fungus; V, virus (species); NONM, the nonIBD group of males; NONF, the nonIBD group of females.
UCM, the Ulcerative Colitis group of males ; CDM, the Crohn disease group of males; UCF, the Ulcerative Colitis group of females; CDF, the Crohn disease group of females.
B-1		c__Acidobacteriia	o__Acidobacteriales	f__Acidobacteriaceae	g__Granulicella	s__Granulicella_unclassified
B-2		c__Actinobacteria	o__Actinomycetales	f__Actinomycetaceae	g__Actinobaculum	s__Actinobaculum_schaalii
B-3		c__Actinobacteria	o__Actinomycetales	f__Actinomycetaceae	g__Actinobaculum	s__Actinobaculum_unclassified
B-4		c__Actinobacteria	o__Actinomycetales	f__Actinomycetaceae	g__Actinomyces	s__Actinomyces_graevenitzii
B-5		c__Actinobacteria	o__Actinomycetales	f__Actinomycetaceae	g__Actinomyces	s__Actinomyces_turicensis
B-6		c__Actinobacteria	o__Actinomycetales	f__Actinomycetaceae	g__Actinomyces	s__Actinomyces_urogenitalis
B-7		c__Actinobacteria	o__Coriobacteriales	f__Coriobacteriaceae	g__Adlercreutzia	s__Adlercreutzia_equolifaciens
B-8		c__Actinobacteria	o__Bifidobacteriales	f__Bifidobacteriaceae	g__Alloscardovia	s__Alloscardovia_omnicolens
B-9		c__Actinobacteria	o__Bifidobacteriales	f__Bifidobacteriaceae	g__Bifidobacterium	s__Bifidobacterium_adolescentis
B-10		c__Actinobacteria	o__Bifidobacteriales	f__Bifidobacteriaceae	g__Bifidobacterium	s__Bifidobacterium_animalis
B-11		c__Actinobacteria	o__Bifidobacteriales	f__Bifidobacteriaceae	g__Bifidobacterium	s__Bifidobacterium_asteroides
B-12		c__Actinobacteria	o__Bifidobacteriales	f__Bifidobacteriaceae	g__Bifidobacterium	s__Bifidobacterium_bifidum
B-13		c__Actinobacteria	o__Bifidobacteriales	f__Bifidobacteriaceae	g__Bifidobacterium	s__Bifidobacterium_breve
B-14		c__Actinobacteria	o__Bifidobacteriales	f__Bifidobacteriaceae	g__Bifidobacterium	s__Bifidobacterium_catenulatum
B-15		c__Actinobacteria	o__Bifidobacteriales	f__Bifidobacteriaceae	g__Bifidobacterium	s__Bifidobacterium_dentium
B-16		c__Actinobacteria	o__Bifidobacteriales	f__Bifidobacteriaceae	g__Bifidobacterium	s__Bifidobacterium_longum
B-17		c__Actinobacteria	o__Bifidobacteriales	f__Bifidobacteriaceae	g__Bifidobacterium	s__Bifidobacterium_pseudocatenulatum
B-18		c__Actinobacteria	o__Bifidobacteriales	f__Bifidobacteriaceae	g__Bifidobacterium	s__Bifidobacterium_pseudolongum
B-19		c__Actinobacteria	o__Actinomycetales	f__Dermabacteraceae	g__Brachybacterium	s__Brachybacterium_unclassified
B-20		c__Actinobacteria	o__Actinomycetales	f__Brevibacteriaceae	g__Brevibacterium	s__Brevibacterium_mcbrellneri
B-21		c__Actinobacteria	o__Coriobacteriales	f__Coriobacteriaceae	g__Collinsella	s__Collinsella_aerofaciens
B-22		c__Actinobacteria	o__Coriobacteriales	f__Coriobacteriaceae	g__Collinsella	s__Collinsella_intestinalis
B-23		c__Actinobacteria	o__Coriobacteriales	f__Coriobacteriaceae	g__Collinsella	s__Collinsella_stercoris
B-24		c__Actinobacteria	o__Coriobacteriales	f__Coriobacteriaceae	g__Collinsella	s__Collinsella_tanakaei
B-25		c__Actinobacteria	o__Coriobacteriales	f__Coriobacteriaceae	g__Collinsella	s__Collinsella_unclassified
B-26		c__Actinobacteria	o__Coriobacteriales	f__Coriobacteriaceae	g__Coriobacteriaceae_noname	s__Coriobacteriaceae_bacterium_phI
B-27		c__Actinobacteria	o__Actinomycetales	f__Corynebacteriaceae	g__Corynebacterium	s__Corynebacterium_accolens
B-28		c__Actinobacteria	o__Coriobacteriales	f__Coriobacteriaceae	g__Eggerthella	s__Eggerthella_lenta
B-29		c__Actinobacteria	o__Coriobacteriales	f__Coriobacteriaceae	g__Eggerthella	s__Eggerthella_unclassified
B-30		c__Actinobacteria	o__Bifidobacteriales	f__Bifidobacteriaceae	g__Gardnerella	s__Gardnerella_vaginalis
B-31		c__Actinobacteria	o__Coriobacteriales	f__Coriobacteriaceae	g__Gordonibacter	s__Gordonibacter_pamelaeae
B-32		c__Actinobacteria	o__Actinomycetales	f__Micrococcaceae	g__Kocuria	s__Kocuria_unclassified
B-33		c__Actinobacteria	o__Actinomycetales	f__Micrococcaceae	g__Micrococcus	s__Micrococcus_luteus
B-34		c__Actinobacteria	o__Actinomycetales	f__Propionibacteriaceae	g__Propionibacterium	s__Propionibacterium_acnes
B-35		c__Actinobacteria	o__Actinomycetales	f__Propionibacteriaceae	g__Propionibacterium	s__Propionibacterium_granulosum
B-36		c__Actinobacteria	o__Actinomycetales	f__Micrococcaceae	g__Rothia	s__Rothia_dentocariosa
B-37		c__Actinobacteria	o__Actinomycetales	f__Micrococcaceae	g__Rothia	s__Rothia_mucilaginosa
B-38		c__Actinobacteria	o__Actinomycetales	f__Micrococcaceae	g__Rothia	s__Rothia_unclassified
B-39		c__Actinobacteria	o__Bifidobacteriales	f__Bifidobacteriaceae	g__Scardovia	s__Scardovia_unclassified
B-40		c__Actinobacteria	o__Bifidobacteriales	f__Bifidobacteriaceae	g__Scardovia	s__Scardovia_wiggsiae
B-41		c__Actinobacteria	o__Coriobacteriales	f__Coriobacteriaceae	g__Slackia	s__Slackia_piriformis
B-42		c__Actinobacteria	o__Actinomycetales	f__Actinomycetaceae	g__Varibaculum	s__Varibaculum_cambriense
B-43		c__Bacteroidetes_noname	o__Bacteroidetes_noname	f__Bacteroidetes_noname	g__Bacteroidetes_noname	s__Bacteroidetes_oral_taxon_274
B-44		c__Bacteroidia	o__Bacteroidales	f__Rikenellaceae	g__Alistipes	s__Alistipes_finegoldii
B-45		c__Bacteroidia	o__Bacteroidales	f__Rikenellaceae	g__Alistipes	s__Alistipes_indistinctus
B-46		c__Bacteroidia	o__Bacteroidales	f__Rikenellaceae	g__Alistipes	s__Alistipes_onderdonkii
B-47		c__Bacteroidia	o__Bacteroidales	f__Rikenellaceae	g__Alistipes	s__Alistipes_putredinis
B-48		c__Bacteroidia	o__Bacteroidales	f__Rikenellaceae	g__Alistipes	s__Alistipes_senegalensis
B-49		c__Bacteroidia	o__Bacteroidales	f__Rikenellaceae	g__Alistipes	s__Alistipes_shahii
B-50		c__Bacteroidia	o__Bacteroidales	f__Rikenellaceae	g__Alistipes	s__Alistipes_sp_AP11
B-51		c__Bacteroidia	o__Bacteroidales	f__Rikenellaceae	g__Alistipes	s__Alistipes_sp_HGB5
B-52		c__Bacteroidia	o__Bacteroidales	f__Rikenellaceae	g__Alistipes	s__Alistipes_unclassified
B-53		c__Bacteroidia	o__Bacteroidales	f__Prevotellaceae	g__Alloprevotella	s__Alloprevotella_tannerae
B-54		c__Bacteroidia	o__Bacteroidales	f__Prevotellaceae	g__Alloprevotella	s__Alloprevotella_unclassified
B-55		c__Bacteroidia	o__Bacteroidales	f__Bacteroidales_noname	g__Bacteroidales_noname	s__Bacteroidales_bacterium_ph8
B-56		c__Bacteroidia	o__Bacteroidales	f__Bacteroidaceae	g__Bacteroides	s__Bacteroides_barnesiae
B-57		c__Bacteroidia	o__Bacteroidales	f__Bacteroidaceae	g__Bacteroides	s__Bacteroides_caccae
B-58		c__Bacteroidia	o__Bacteroidales	f__Bacteroidaceae	g__Bacteroides	s__Bacteroides_cellulosilyticus
B-59		c__Bacteroidia	o__Bacteroidales	f__Bacteroidaceae	g__Bacteroides	s__Bacteroides_clarus
B-60		c__Bacteroidia	o__Bacteroidales	f__Bacteroidaceae	g__Bacteroides	s__Bacteroides_coprocola
B-61		c__Bacteroidia	o__Bacteroidales	f__Bacteroidaceae	g__Bacteroides	s__Bacteroides_dorei
B-62		c__Bacteroidia	o__Bacteroidales	f__Bacteroidaceae	g__Bacteroides	s__Bacteroides_eggerthii
B-63		c__Bacteroidia	o__Bacteroidales	f__Bacteroidaceae	g__Bacteroides	s__Bacteroides_faecis
B-64		c__Bacteroidia	o__Bacteroidales	f__Bacteroidaceae	g__Bacteroides	s__Bacteroides_finegoldii
B-65		c__Bacteroidia	o__Bacteroidales	f__Bacteroidaceae	g__Bacteroides	s__Bacteroides_fluxus
B-66		c__Bacteroidia	o__Bacteroidales	f__Bacteroidaceae	g__Bacteroides	s__Bacteroides_fragilis
B-67		c__Bacteroidia	o__Bacteroidales	f__Bacteroidaceae	g__Bacteroides	s__Bacteroides_gallinarum
B-68		c__Bacteroidia	o__Bacteroidales	f__Bacteroidaceae	g__Bacteroides	s__Bacteroides_intestinalis
B-69		c__Bacteroidia	o__Bacteroidales	f__Bacteroidaceae	g__Bacteroides	s__Bacteroides_massiliensis
B-70		c__Bacteroidia	o__Bacteroidales	f__Bacteroidaceae	g__Bacteroides	s__Bacteroides_nordii
B-71		c__Bacteroidia	o__Bacteroidales	f__Bacteroidaceae	g__Bacteroides	s__Bacteroides_oleiciplenus
B-72		c__Bacteroidia	o__Bacteroidales	f__Bacteroidaceae	g__Bacteroides	s__Bacteroides_ovatus
B-73		c__Bacteroidia	o__Bacteroidales	f__Bacteroidaceae	g__Bacteroides	s__Bacteroides_plebeius
B-74		c__Bacteroidia	o__Bacteroidales	f__Bacteroidaceae	g__Bacteroides	s__Bacteroides_salyersiae
B-75		c__Bacteroidia	o__Bacteroidales	f__Bacteroidaceae	g__Bacteroides	s__Bacteroides_sp_1_1_30
B-76		c__Bacteroidia	o__Bacteroidales	f__Bacteroidaceae	g__Bacteroides	s__Bacteroides_sp_1_1_6
B-77		c__Bacteroidia	o__Bacteroidales	f__Bacteroidaceae	g__Bacteroides	s__Bacteroides_sp_2_1_22
B-78		c__Bacteroidia	o__Bacteroidales	f__Bacteroidaceae	g__Bacteroides	s__Bacteroides_sp_3_2_5
B-79		c__Bacteroidia	o__Bacteroidales	f__Bacteroidaceae	g__Bacteroides	s__Bacteroides_sp_4_3_47FAA
B-80		c__Bacteroidia	o__Bacteroidales	f__Bacteroidaceae	g__Bacteroides	s__Bacteroides_sp_9_1_42FAA
B-81		c__Bacteroidia	o__Bacteroidales	f__Bacteroidaceae	g__Bacteroides	s__Bacteroides_stercoris
B-82		c__Bacteroidia	o__Bacteroidales	f__Bacteroidaceae	g__Bacteroides	s__Bacteroides_thetaiotaomicron
B-83		c__Bacteroidia	o__Bacteroidales	f__Bacteroidaceae	g__Bacteroides	s__Bacteroides_xylanisolvens
B-84		c__Bacteroidia	o__Bacteroidales	f__Porphyromonadaceae	g__Barnesiella	s__Barnesiella_intestinihominis
B-85		c__Bacteroidia	o__Bacteroidales	f__Porphyromonadaceae	g__Butyricimonas	s__Butyricimonas_synergistica
B-86		c__Bacteroidia	o__Bacteroidales	f__Porphyromonadaceae	g__Coprobacter	s__Coprobacter_fastidiosus
B-87		c__Bacteroidia	o__Bacteroidales	f__Porphyromonadaceae	g__Dysgonomonas	s__Dysgonomonas_gadei
B-88		c__Bacteroidia	o__Bacteroidales	f__Porphyromonadaceae	g__Dysgonomonas	s__Dysgonomonas_mossii
B-89		c__Bacteroidia	o__Bacteroidales	f__Porphyromonadaceae	g__Dysgonomonas	s__Dysgonomonas_unclassified
B-90		c__Bacteroidia	o__Bacteroidales	f__Porphyromonadaceae	g__Odoribacter	s__Odoribacter_laneus
B-91		c__Bacteroidia	o__Bacteroidales	f__Porphyromonadaceae	g__Odoribacter	s__Odoribacter_splanchnicus
B-92		c__Bacteroidia	o__Bacteroidales	f__Porphyromonadaceae	g__Odoribacter	s__Odoribacter_unclassified
B-93		c__Bacteroidia	o__Bacteroidales	f__Porphyromonadaceae	g__Parabacteroides	s__Parabacteroides_distasonis
B-94		c__Bacteroidia	o__Bacteroidales	f__Porphyromonadaceae	g__Parabacteroides	s__Parabacteroides_goldsteinii
B-95		c__Bacteroidia	o__Bacteroidales	f__Porphyromonadaceae	g__Parabacteroides	s__Parabacteroides_johnsonii
B-96		c__Bacteroidia	o__Bacteroidales	f__Porphyromonadaceae	g__Parabacteroides	s__Parabacteroides_merdae
B-97		c__Bacteroidia	o__Bacteroidales	f__Porphyromonadaceae	g__Parabacteroides	s__Parabacteroides_sp_20_3
B-98		c__Bacteroidia	o__Bacteroidales	f__Porphyromonadaceae	g__Parabacteroides	s__Parabacteroides_sp_D13
B-99		c__Bacteroidia	o__Bacteroidales	f__Porphyromonadaceae	g__Parabacteroides	s__Parabacteroides_unclassified
B-100		c__Bacteroidia	o__Bacteroidales	f__Prevotellaceae	g__Paraprevotella	s__Paraprevotella_clara
B-101		c__Bacteroidia	o__Bacteroidales	f__Prevotellaceae	g__Paraprevotella	s__Paraprevotella_unclassified
B-102		c__Bacteroidia	o__Bacteroidales	f__Prevotellaceae	g__Paraprevotella	s__Paraprevotella_xylaniphila
B-103		c__Bacteroidia	o__Bacteroidales	f__Porphyromonadaceae	g__Porphyromonas	s__Porphyromonas_asaccharolytica
B-104		c__Bacteroidia	o__Bacteroidales	f__Porphyromonadaceae	g__Porphyromonas	s__Porphyromonas_bennonis
B-105		c__Bacteroidia	o__Bacteroidales	f__Porphyromonadaceae	g__Porphyromonas	s__Porphyromonas_endodontalis
B-106		c__Bacteroidia	o__Bacteroidales	f__Porphyromonadaceae	g__Porphyromonas	s__Porphyromonas_somerae
B-107		c__Bacteroidia	o__Bacteroidales	f__Porphyromonadaceae	g__Porphyromonas	s__Porphyromonas_uenonis
B-108		c__Bacteroidia	o__Bacteroidales	f__Prevotellaceae	g__Prevotella	s__Prevotella_amnii
B-109		c__Bacteroidia	o__Bacteroidales	f__Prevotellaceae	g__Prevotella	s__Prevotella_bergensis
B-110		c__Bacteroidia	o__Bacteroidales	f__Prevotellaceae	g__Prevotella	s__Prevotella_bivia
B-111		c__Bacteroidia	o__Bacteroidales	f__Prevotellaceae	g__Prevotella	s__Prevotella_buccae
B-112		c__Bacteroidia	o__Bacteroidales	f__Prevotellaceae	g__Prevotella	s__Prevotella_buccalis
B-113		c__Bacteroidia	o__Bacteroidales	f__Prevotellaceae	g__Prevotella	s__Prevotella_copri
B-114		c__Bacteroidia	o__Bacteroidales	f__Prevotellaceae	g__Prevotella	s__Prevotella_denticola
B-115		c__Bacteroidia	o__Bacteroidales	f__Prevotellaceae	g__Prevotella	s__Prevotella_disiens
B-116		c__Bacteroidia	o__Bacteroidales	f__Prevotellaceae	g__Prevotella	s__Prevotella_melaninogenica
B-117		c__Bacteroidia	o__Bacteroidales	f__Prevotellaceae	g__Prevotella	s__Prevotella_nigrescens
B-118		c__Bacteroidia	o__Bacteroidales	f__Prevotellaceae	g__Prevotella	s__Prevotella_oralis
B-119		c__Bacteroidia	o__Bacteroidales	f__Prevotellaceae	g__Prevotella	s__Prevotella_oris
B-120		c__Bacteroidia	o__Bacteroidales	f__Prevotellaceae	g__Prevotella	s__Prevotella_stercorea
B-121		c__Bacteroidia	o__Bacteroidales	f__Prevotellaceae	g__Prevotella	s__Prevotella_timonensis
B-122		c__Flavobacteriia	o__Flavobacteriales	f__Flavobacteriaceae	g__Cellulophaga	s__Cellulophaga_unclassified
B-123		c__Sphingobacteriia	o__Sphingobacteriales	f__Sphingobacteriaceae	g__Pedobacter	s__Pedobacter_unclassified
B-124		c__Deinococci	o__Deinococcales	f__Deinococcaceae	g__Deinococcus	s__Deinococcus_unclassified
B-125		c__Bacilli	o__Lactobacillales	f__Aerococcaceae	g__Abiotrophia	s__Abiotrophia_defectiva
B-126		c__Bacilli	o__Lactobacillales	f__Aerococcaceae	g__Aerococcus	s__Aerococcus_viridans
B-127		c__Bacilli	o__Bacillales	f__Bacillaceae	g__Bacillus	s__Bacillus_licheniformis
B-128		c__Bacilli	o__Lactobacillales	f__Enterococcaceae	g__Enterococcus	s__Enterococcus_asini
B-129		c__Bacilli	o__Lactobacillales	f__Enterococcaceae	g__Enterococcus	s__Enterococcus_avium
B-130		c__Bacilli	o__Lactobacillales	f__Enterococcaceae	g__Enterococcus	s__Enterococcus_casseliflavus
B-131		c__Bacilli	o__Lactobacillales	f__Enterococcaceae	g__Enterococcus	s__Enterococcus_dispar
B-132		c__Bacilli	o__Lactobacillales	f__Enterococcaceae	g__Enterococcus	s__Enterococcus_durans
B-133		c__Bacilli	o__Lactobacillales	f__Enterococcaceae	g__Enterococcus	s__Enterococcus_faecalis
B-134		c__Bacilli	o__Lactobacillales	f__Enterococcaceae	g__Enterococcus	s__Enterococcus_faecium
B-135		c__Bacilli	o__Lactobacillales	f__Enterococcaceae	g__Enterococcus	s__Enterococcus_gallinarum
B-136		c__Bacilli	o__Lactobacillales	f__Enterococcaceae	g__Enterococcus	s__Enterococcus_hirae
B-137		c__Bacilli	o__Lactobacillales	f__Enterococcaceae	g__Enterococcus	s__Enterococcus_mundtii
B-138		c__Bacilli	o__Lactobacillales	f__Aerococcaceae	g__Facklamia	s__Facklamia_unclassified
B-139		c__Bacilli	o__Bacillales	f__Bacillales_noname	g__Gemella	s__Gemella_haemolysans
B-140		c__Bacilli	o__Bacillales	f__Bacillales_noname	g__Gemella	s__Gemella_morbillorum
B-141		c__Bacilli	o__Lactobacillales	f__Carnobacteriaceae	g__Granulicatella	s__Granulicatella_adiacens
B-142		c__Bacilli	o__Lactobacillales	f__Carnobacteriaceae	g__Granulicatella	s__Granulicatella_elegans
B-143		c__Bacilli	o__Lactobacillales	f__Carnobacteriaceae	g__Granulicatella	s__Granulicatella_unclassified
B-144		c__Bacilli	o__Lactobacillales	f__Lactobacillaceae	g__Lactobacillus	s__Lactobacillus_acidophilus
B-145		c__Bacilli	o__Lactobacillales	f__Lactobacillaceae	g__Lactobacillus	s__Lactobacillus_animalis
B-146		c__Bacilli	o__Lactobacillales	f__Lactobacillaceae	g__Lactobacillus	s__Lactobacillus_casei_paracasei
B-147		c__Bacilli	o__Lactobacillales	f__Lactobacillaceae	g__Lactobacillus	s__Lactobacillus_crispatus
B-148		c__Bacilli	o__Lactobacillales	f__Lactobacillaceae	g__Lactobacillus	s__Lactobacillus_curvatus
B-149		c__Bacilli	o__Lactobacillales	f__Lactobacillaceae	g__Lactobacillus	s__Lactobacillus_delbrueckii
B-150		c__Bacilli	o__Lactobacillales	f__Lactobacillaceae	g__Lactobacillus	s__Lactobacillus_fermentum
B-151		c__Bacilli	o__Lactobacillales	f__Lactobacillaceae	g__Lactobacillus	s__Lactobacillus_gasseri
B-152		c__Bacilli	o__Lactobacillales	f__Lactobacillaceae	g__Lactobacillus	s__Lactobacillus_mucosae
B-153		c__Bacilli	o__Lactobacillales	f__Lactobacillaceae	g__Lactobacillus	s__Lactobacillus_oris
B-154		c__Bacilli	o__Lactobacillales	f__Lactobacillaceae	g__Lactobacillus	s__Lactobacillus_plantarum
B-155		c__Bacilli	o__Lactobacillales	f__Lactobacillaceae	g__Lactobacillus	s__Lactobacillus_reuteri
B-156		c__Bacilli	o__Lactobacillales	f__Lactobacillaceae	g__Lactobacillus	s__Lactobacillus_rhamnosus
B-157		c__Bacilli	o__Lactobacillales	f__Lactobacillaceae	g__Lactobacillus	s__Lactobacillus_ruminis
B-158		c__Bacilli	o__Lactobacillales	f__Lactobacillaceae	g__Lactobacillus	s__Lactobacillus_sakei
B-159		c__Bacilli	o__Lactobacillales	f__Lactobacillaceae	g__Lactobacillus	s__Lactobacillus_salivarius
B-160		c__Bacilli	o__Lactobacillales	f__Lactobacillaceae	g__Lactobacillus	s__Lactobacillus_sanfranciscensis
B-161		c__Bacilli	o__Lactobacillales	f__Lactobacillaceae	g__Lactobacillus	s__Lactobacillus_vaginalis
B-162		c__Bacilli	o__Lactobacillales	f__Streptococcaceae	g__Lactococcus	s__Lactococcus_garvieae
B-163		c__Bacilli	o__Lactobacillales	f__Streptococcaceae	g__Lactococcus	s__Lactococcus_lactis
B-164		c__Bacilli	o__Lactobacillales	f__Lactobacillaceae	g__Pediococcus	s__Pediococcus_acidilactici
B-165		c__Bacilli	o__Lactobacillales	f__Lactobacillaceae	g__Pediococcus	s__Pediococcus_lolii
B-166		c__Bacilli	o__Lactobacillales	f__Lactobacillaceae	g__Pediococcus	s__Pediococcus_pentosaceus
B-167		c__Bacilli	o__Lactobacillales	f__Lactobacillaceae	g__Pediococcus	s__Pediococcus_unclassified
B-168		c__Bacilli	o__Bacillales	f__Staphylococcaceae	g__Staphylococcus	s__Staphylococcus_aureus
B-169		c__Bacilli	o__Bacillales	f__Staphylococcaceae	g__Staphylococcus	s__Staphylococcus_epidermidis
B-170		c__Bacilli	o__Bacillales	f__Staphylococcaceae	g__Staphylococcus	s__Staphylococcus_hominis
B-171		c__Bacilli	o__Lactobacillales	f__Streptococcaceae	g__Streptococcus	s__Streptococcus_agalactiae
B-172		c__Bacilli	o__Lactobacillales	f__Streptococcaceae	g__Streptococcus	s__Streptococcus_anginosus
B-173		c__Bacilli	o__Lactobacillales	f__Streptococcaceae	g__Streptococcus	s__Streptococcus_australis
B-174		c__Bacilli	o__Lactobacillales	f__Streptococcaceae	g__Streptococcus	s__Streptococcus_cristatus
B-175		c__Bacilli	o__Lactobacillales	f__Streptococcaceae	g__Streptococcus	s__Streptococcus_gordonii
B-176		c__Bacilli	o__Lactobacillales	f__Streptococcaceae	g__Streptococcus	s__Streptococcus_infantarius
B-177		c__Bacilli	o__Lactobacillales	f__Streptococcaceae	g__Streptococcus	s__Streptococcus_infantis
B-178		c__Bacilli	o__Lactobacillales	f__Streptococcaceae	g__Streptococcus	s__Streptococcus_intermedius
B-179		c__Bacilli	o__Lactobacillales	f__Streptococcaceae	g__Streptococcus	s__Streptococcus_lutetiensis
B-180		c__Bacilli	o__Lactobacillales	f__Streptococcaceae	g__Streptococcus	s__Streptococcus_mitis_oralis_pneumoniae
B-181		c__Bacilli	o__Lactobacillales	f__Streptococcaceae	g__Streptococcus	s__Streptococcus_mutans
B-182		c__Bacilli	o__Lactobacillales	f__Streptococcaceae	g__Streptococcus	s__Streptococcus_parasanguinis
B-183		c__Bacilli	o__Lactobacillales	f__Streptococcaceae	g__Streptococcus	s__Streptococcus_peroris
B-184		c__Bacilli	o__Lactobacillales	f__Streptococcaceae	g__Streptococcus	s__Streptococcus_pseudopneumoniae
B-185		c__Bacilli	o__Lactobacillales	f__Streptococcaceae	g__Streptococcus	s__Streptococcus_salivarius
B-186		c__Bacilli	o__Lactobacillales	f__Streptococcaceae	g__Streptococcus	s__Streptococcus_sanguinis
B-187		c__Bacilli	o__Lactobacillales	f__Streptococcaceae	g__Streptococcus	s__Streptococcus_thermophilus
B-188		c__Bacilli	o__Lactobacillales	f__Streptococcaceae	g__Streptococcus	s__Streptococcus_vestibularis
B-189		c__Bacilli	o__Lactobacillales	f__Leuconostocaceae	g__Weissella	s__Weissella_cibaria
B-190		c__Bacilli	o__Lactobacillales	f__Leuconostocaceae	g__Weissella	s__Weissella_confusa
B-191		c__Bacilli	o__Lactobacillales	f__Leuconostocaceae	g__Weissella	s__Weissella_unclassified
B-192		c__Clostridia	o__Clostridiales	f__Clostridiales_Family_XI_Incertae_Sedis	g__Anaerococcus	s__Anaerococcus_obesiensis
B-193		c__Clostridia	o__Clostridiales	f__Clostridiales_Family_XI_Incertae_Sedis	g__Anaerococcus	s__Anaerococcus_vaginalis
B-194		c__Clostridia	o__Clostridiales	f__Eubacteriaceae	g__Anaerofustis	s__Anaerofustis_stercorihominis
B-195		c__Clostridia	o__Clostridiales	f__Lachnospiraceae	g__Anaerostipes	s__Anaerostipes_caccae
B-196		c__Clostridia	o__Clostridiales	f__Lachnospiraceae	g__Anaerostipes	s__Anaerostipes_hadrus
B-197		c__Clostridia	o__Clostridiales	f__Lachnospiraceae	g__Anaerostipes	s__Anaerostipes_unclassified
B-198		c__Clostridia	o__Clostridiales	f__Ruminococcaceae	g__Anaerotruncus	s__Anaerotruncus_colihominis
B-199		c__Clostridia	o__Clostridiales	f__Ruminococcaceae	g__Anaerotruncus	s__Anaerotruncus_unclassified
B-200		c__Clostridia	o__Clostridiales	f__Clostridiales_noname	g__Clostridiales_noname	s__Bacteroides_pectinophilus
B-201		c__Clostridia	o__Clostridiales	f__Lachnospiraceae	g__Blautia	s__Blautia_hansenii
B-202		c__Clostridia	o__Clostridiales	f__Lachnospiraceae	g__Blautia	s__Blautia_hydrogenotrophica
B-203		c__Clostridia	o__Clostridiales	f__Lachnospiraceae	g__Blautia	s__Blautia_producta
B-204		c__Clostridia	o__Clostridiales	f__Clostridiaceae	g__Butyricicoccus	s__Butyricicoccus_pullicaecorum
B-205		c__Clostridia	o__Clostridiales	f__Lachnospiraceae	g__Butyrivibrio	s__Butyrivibrio_crossotus
B-206		c__Clostridia	o__Clostridiales	f__Lachnospiraceae	g__Butyrivibrio	s__Butyrivibrio_unclassified
B-207		c__Clostridia	o__Clostridiales	f__Lachnospiraceae	g__Cellulosilyticum	s__Cellulosilyticum_lentocellum
B-208		c__Clostridia	o__Clostridiales	f__Clostridiaceae	g__Clostridiaceae_noname	s__Clostridiaceae_bacterium_JC118
B-209		c__Clostridia	o__Clostridiales	f__Clostridiales_noname	g__Clostridiales_noname	s__Clostridiales_bacterium_1_7_47FAA
B-210		c__Clostridia	o__Clostridiales	f__Clostridiales_Family_XI_Incertae_Sedis	g__Clostridiales_Family_XI_Incertae_Sedis_noname	s__Clostridiales_bacterium_BV3C26
B-211		c__Clostridia	o__Clostridiales	f__Clostridiaceae	g__Clostridium	s__Clostridium_asparagiforme
B-212		c__Clostridia	o__Clostridiales	f__Peptostreptococcaceae	g__Peptostreptococcaceae_noname	s__Clostridium_bartlettii
B-213		c__Clostridia	o__Clostridiales	f__Clostridiaceae	g__Clostridium	s__Clostridium_bolteae
B-214		c__Clostridia	o__Clostridiales	f__Clostridiaceae	g__Clostridium	s__Clostridium_butyricum
B-215		c__Clostridia	o__Clostridiales	f__Clostridiaceae	g__Clostridium	s__Clostridium_citroniae
B-216		c__Clostridia	o__Clostridiales	f__Clostridiaceae	g__Clostridium	s__Clostridium_clostridioforme
B-217		c__Clostridia	o__Clostridiales	f__Peptostreptococcaceae	g__Peptostreptococcaceae_noname	s__Clostridium_difficile
B-218		c__Clostridia	o__Clostridiales	f__Peptostreptococcaceae	g__Peptostreptococcaceae_noname	s__Clostridium_glycolicum
B-219		c__Clostridia	o__Clostridiales	f__Clostridiaceae	g__Clostridium	s__Clostridium_hathewayi
B-220		c__Clostridia	o__Clostridiales	f__Clostridiaceae	g__Clostridium	s__Clostridium_hylemonae
B-221		c__Clostridia	o__Clostridiales	f__Clostridiaceae	g__Clostridium	s__Clostridium_leptum
B-222		c__Clostridia	o__Clostridiales	f__Clostridiaceae	g__Clostridium	s__Clostridium_nexile
B-223		c__Clostridia	o__Clostridiales	f__Clostridiaceae	g__Clostridium	s__Clostridium_perfringens
B-224		c__Clostridia	o__Clostridiales	f__Clostridiaceae	g__Clostridium	s__Clostridium_scindens
B-225		c__Clostridia	o__Clostridiales	f__Clostridiaceae	g__Clostridium	s__Clostridium_sp_ATCC_BAA_442
B-226		c__Clostridia	o__Clostridiales	f__Clostridiaceae	g__Clostridium	s__Clostridium_sp_D5
B-227		c__Clostridia	o__Clostridiales	f__Clostridiaceae	g__Clostridium	s__Clostridium_sp_KLE_1755
B-228		c__Clostridia	o__Clostridiales	f__Clostridiaceae	g__Clostridium	s__Clostridium_sp_L2_50
B-229		c__Clostridia	o__Clostridiales	f__Clostridiaceae	g__Clostridium	s__Clostridium_sporogenes
B-230		c__Clostridia	o__Clostridiales	f__Clostridiaceae	g__Clostridium	s__Clostridium_symbiosum
B-231		c__Clostridia	o__Clostridiales	f__Lachnospiraceae	g__Coprococcus	s__Coprococcus_catus
B-232		c__Clostridia	o__Clostridiales	f__Lachnospiraceae	g__Coprococcus	s__Coprococcus_comes
B-233		c__Clostridia	o__Clostridiales	f__Lachnospiraceae	g__Coprococcus	s__Coprococcus_eutactus
B-234		c__Clostridia	o__Clostridiales	f__Lachnospiraceae	g__Coprococcus	s__Coprococcus_sp_ART55_1
B-235		c__Clostridia	o__Clostridiales	f__Lachnospiraceae	g__Dorea	s__Dorea_formicigenerans
B-236		c__Clostridia	o__Clostridiales	f__Lachnospiraceae	g__Dorea	s__Dorea_longicatena
B-237		c__Clostridia	o__Clostridiales	f__Lachnospiraceae	g__Dorea	s__Dorea_unclassified
B-238		c__Clostridia	o__Clostridiales	f__Eubacteriaceae	g__Eubacterium	s__Eubacterium_brachy
B-239		c__Clostridia	o__Clostridiales	f__Eubacteriaceae	g__Eubacterium	s__Eubacterium_eligens
B-240		c__Clostridia	o__Clostridiales	f__Eubacteriaceae	g__Eubacterium	s__Eubacterium_hallii
B-241		c__Clostridia	o__Clostridiales	f__Eubacteriaceae	g__Eubacterium	s__Eubacterium_limosum
B-242		c__Clostridia	o__Clostridiales	f__Eubacteriaceae	g__Eubacterium	s__Eubacterium_ramulus
B-243		c__Clostridia	o__Clostridiales	f__Eubacteriaceae	g__Eubacterium	s__Eubacterium_rectale
B-244		c__Clostridia	o__Clostridiales	f__Eubacteriaceae	g__Eubacterium	s__Eubacterium_siraeum
B-245		c__Clostridia	o__Clostridiales	f__Eubacteriaceae	g__Eubacterium	s__Eubacterium_sp_3_1_31
B-246		c__Clostridia	o__Clostridiales	f__Eubacteriaceae	g__Eubacterium	s__Eubacterium_ventriosum
B-247		c__Clostridia	o__Clostridiales	f__Ruminococcaceae	g__Faecalibacterium	s__Faecalibacterium_prausnitzii
B-248		c__Clostridia	o__Clostridiales	f__Clostridiales_Family_XI_Incertae_Sedis	g__Finegoldia	s__Finegoldia_magna
B-249		c__Clostridia	o__Clostridiales	f__Clostridiales_noname	g__Flavonifractor	s__Flavonifractor_plautii
B-250		c__Clostridia	o__Clostridiales	f__Lachnospiraceae	g__Lachnospiraceae_noname	s__Lachnospiraceae_bacterium_1_1_57FAA
B-251		c__Clostridia	o__Clostridiales	f__Lachnospiraceae	g__Lachnospiraceae_noname	s__Lachnospiraceae_bacterium_1_4_56FAA
B-252		c__Clostridia	o__Clostridiales	f__Lachnospiraceae	g__Lachnospiraceae_noname	s__Lachnospiraceae_bacterium_2_1_46FAA
B-253		c__Clostridia	o__Clostridiales	f__Lachnospiraceae	g__Lachnospiraceae_noname	s__Lachnospiraceae_bacterium_2_1_58FAA
B-254		c__Clostridia	o__Clostridiales	f__Lachnospiraceae	g__Lachnospiraceae_noname	s__Lachnospiraceae_bacterium_3_1_46FAA
B-255		c__Clostridia	o__Clostridiales	f__Lachnospiraceae	g__Lachnospiraceae_noname	s__Lachnospiraceae_bacterium_3_1_57FAA_CT1
B-256		c__Clostridia	o__Clostridiales	f__Lachnospiraceae	g__Lachnospiraceae_noname	s__Lachnospiraceae_bacterium_4_1_37FAA
B-257		c__Clostridia	o__Clostridiales	f__Lachnospiraceae	g__Lachnospiraceae_noname	s__Lachnospiraceae_bacterium_5_1_57FAA
B-258		c__Clostridia	o__Clostridiales	f__Lachnospiraceae	g__Lachnospiraceae_noname	s__Lachnospiraceae_bacterium_5_1_63FAA
B-259		c__Clostridia	o__Clostridiales	f__Lachnospiraceae	g__Lachnospiraceae_noname	s__Lachnospiraceae_bacterium_6_1_63FAA
B-260		c__Clostridia	o__Clostridiales	f__Lachnospiraceae	g__Lachnospiraceae_noname	s__Lachnospiraceae_bacterium_7_1_58FAA
B-261		c__Clostridia	o__Clostridiales	f__Lachnospiraceae	g__Lachnospiraceae_noname	s__Lachnospiraceae_bacterium_8_1_57FAA
B-262		c__Clostridia	o__Clostridiales	f__Lachnospiraceae	g__Lachnospiraceae_noname	s__Lachnospiraceae_bacterium_9_1_43BFAA
B-263		c__Clostridia	o__Clostridiales	f__Lachnospiraceae	g__Marvinbryantia	s__Marvinbryantia_formatexigens
B-264		c__Clostridia	o__Clostridiales	f__Oscillospiraceae	g__Oscillibacter	s__Oscillibacter_sp_KLE_1728
B-265		c__Clostridia	o__Clostridiales	f__Oscillospiraceae	g__Oscillibacter	s__Oscillibacter_sp_KLE_1745
B-266		c__Clostridia	o__Clostridiales	f__Oscillospiraceae	g__Oscillibacter	s__Oscillibacter_unclassified
B-267		c__Clostridia	o__Clostridiales	f__Clostridiales_Family_XI_Incertae_Sedis	g__Parvimonas	s__Parvimonas_micra
B-268		c__Clostridia	o__Clostridiales	f__Clostridiales_Family_XI_Incertae_Sedis	g__Parvimonas	s__Parvimonas_unclassified
B-269		c__Clostridia	o__Clostridiales	f__Clostridiales_Family_XI_Incertae_Sedis	g__Peptoniphilus	s__Peptoniphilus_harei
B-270		c__Clostridia	o__Clostridiales	f__Clostridiales_Family_XI_Incertae_Sedis	g__Peptoniphilus	s__Peptoniphilus_lacrimalis
B-271		c__Clostridia	o__Clostridiales	f__Peptostreptococcaceae	g__Peptostreptococcaceae_noname	s__Peptostreptococcaceae_noname_unclassified
B-272		c__Clostridia	o__Clostridiales	f__Peptostreptococcaceae	g__Peptostreptococcus	s__Peptostreptococcus_anaerobius
B-273		c__Clostridia	o__Clostridiales	f__Peptostreptococcaceae	g__Peptostreptococcus	s__Peptostreptococcus_stomatis
B-274		c__Clostridia	o__Clostridiales	f__Peptostreptococcaceae	g__Peptostreptococcus	s__Peptostreptococcus_unclassified
B-275		c__Clostridia	o__Clostridiales	f__Clostridiales_noname	g__Pseudoflavonifractor	s__Pseudoflavonifractor_capillosus
B-276		c__Clostridia	o__Clostridiales	f__Lachnospiraceae	g__Roseburia	s__Roseburia_hominis
B-277		c__Clostridia	o__Clostridiales	f__Lachnospiraceae	g__Roseburia	s__Roseburia_intestinalis
B-278		c__Clostridia	o__Clostridiales	f__Lachnospiraceae	g__Roseburia	s__Roseburia_inulinivorans
B-279		c__Clostridia	o__Clostridiales	f__Lachnospiraceae	g__Roseburia	s__Roseburia_unclassified
B-280		c__Clostridia	o__Clostridiales	f__Ruminococcaceae	g__Ruminococcaceae_noname	s__Ruminococcaceae_bacterium_D16
B-281		c__Clostridia	o__Clostridiales	f__Ruminococcaceae	g__Ruminococcus	s__Ruminococcus_albus
B-282		c__Clostridia	o__Clostridiales	f__Ruminococcaceae	g__Ruminococcus	s__Ruminococcus_bromii
B-283		c__Clostridia	o__Clostridiales	f__Ruminococcaceae	g__Ruminococcus	s__Ruminococcus_callidus
B-284		c__Clostridia	o__Clostridiales	f__Ruminococcaceae	g__Ruminococcus	s__Ruminococcus_champanellensis
B-285		c__Clostridia	o__Clostridiales	f__Ruminococcaceae	g__Ruminococcus	s__Ruminococcus_flavefaciens
B-286		c__Clostridia	o__Clostridiales	f__Lachnospiraceae	g__Blautia	s__Ruminococcus_gnavus
B-287		c__Clostridia	o__Clostridiales	f__Ruminococcaceae	g__Ruminococcus	s__Ruminococcus_lactaris
B-288		c__Clostridia	o__Clostridiales	f__Lachnospiraceae	g__Blautia	s__Ruminococcus_obeum
B-289		c__Clostridia	o__Clostridiales	f__Ruminococcaceae	g__Ruminococcus	s__Ruminococcus_sp_5_1_39BFAA
B-290		c__Clostridia	o__Clostridiales	f__Lachnospiraceae	g__Blautia	s__Ruminococcus_torques
B-291		c__Clostridia	o__Clostridiales	f__Ruminococcaceae	g__Subdoligranulum	s__Subdoligranulum_sp_4_3_54A2FAA
B-292		c__Clostridia	o__Clostridiales	f__Ruminococcaceae	g__Subdoligranulum	s__Subdoligranulum_unclassified
B-293		c__Clostridia	o__Clostridiales	f__Ruminococcaceae	g__Subdoligranulum	s__Subdoligranulum_variabile
B-294		c__Erysipelotrichia	o__Erysipelotrichales	f__Erysipelotrichaceae	g__Catenibacterium	s__Catenibacterium_mitsuokai
B-295		c__Erysipelotrichia	o__Erysipelotrichales	f__Erysipelotrichaceae	g__Erysipelotrichaceae_noname	s__Clostridium_innocuum
B-296		c__Erysipelotrichia	o__Erysipelotrichales	f__Erysipelotrichaceae	g__Erysipelotrichaceae_noname	s__Clostridium_ramosum
B-297		c__Erysipelotrichia	o__Erysipelotrichales	f__Erysipelotrichaceae	g__Erysipelotrichaceae_noname	s__Clostridium_spiroforme
B-298		c__Erysipelotrichia	o__Erysipelotrichales	f__Erysipelotrichaceae	g__Coprobacillus	s__Coprobacillus_sp_29_1
B-299		c__Erysipelotrichia	o__Erysipelotrichales	f__Erysipelotrichaceae	g__Coprobacillus	s__Coprobacillus_sp_D6
B-300		c__Erysipelotrichia	o__Erysipelotrichales	f__Erysipelotrichaceae	g__Coprobacillus	s__Coprobacillus_unclassified
B-301		c__Erysipelotrichia	o__Erysipelotrichales	f__Erysipelotrichaceae	g__Erysipelotrichaceae_noname	s__Erysipelotrichaceae_bacterium_2_2_44A
B-302		c__Erysipelotrichia	o__Erysipelotrichales	f__Erysipelotrichaceae	g__Erysipelotrichaceae_noname	s__Erysipelotrichaceae_bacterium_21_3
B-303		c__Erysipelotrichia	o__Erysipelotrichales	f__Erysipelotrichaceae	g__Erysipelotrichaceae_noname	s__Erysipelotrichaceae_bacterium_3_1_53
B-304		c__Erysipelotrichia	o__Erysipelotrichales	f__Erysipelotrichaceae	g__Erysipelotrichaceae_noname	s__Erysipelotrichaceae_bacterium_5_2_54FAA
B-305		c__Erysipelotrichia	o__Erysipelotrichales	f__Erysipelotrichaceae	g__Erysipelotrichaceae_noname	s__Erysipelotrichaceae_bacterium_6_1_45
B-306		c__Erysipelotrichia	o__Erysipelotrichales	f__Erysipelotrichaceae	g__Erysipelotrichaceae_noname	s__Eubacterium_biforme
B-307		c__Erysipelotrichia	o__Erysipelotrichales	f__Erysipelotrichaceae	g__Erysipelotrichaceae_noname	s__Eubacterium_cylindroides
B-308		c__Erysipelotrichia	o__Erysipelotrichales	f__Erysipelotrichaceae	g__Erysipelotrichaceae_noname	s__Eubacterium_dolichum
B-309		c__Erysipelotrichia	o__Erysipelotrichales	f__Erysipelotrichaceae	g__Holdemania	s__Holdemania_filiformis
B-310		c__Erysipelotrichia	o__Erysipelotrichales	f__Erysipelotrichaceae	g__Holdemania	s__Holdemania_unclassified
B-311		c__Erysipelotrichia	o__Erysipelotrichales	f__Erysipelotrichaceae	g__Solobacterium	s__Solobacterium_moorei
B-312		c__Erysipelotrichia	o__Erysipelotrichales	f__Erysipelotrichaceae	g__Turicibacter	s__Turicibacter_sanguinis
B-313		c__Erysipelotrichia	o__Erysipelotrichales	f__Erysipelotrichaceae	g__Turicibacter	s__Turicibacter_unclassified
B-314		c__Negativicutes	o__Selenomonadales	f__Acidaminococcaceae	g__Acidaminococcus	s__Acidaminococcus_intestini
B-315		c__Negativicutes	o__Selenomonadales	f__Acidaminococcaceae	g__Acidaminococcus	s__Acidaminococcus_unclassified
B-316		c__Negativicutes	o__Selenomonadales	f__Veillonellaceae	g__Anaeroglobus	s__Anaeroglobus_geminatus
B-317		c__Negativicutes	o__Selenomonadales	f__Veillonellaceae	g__Dialister	s__Dialister_invisus
B-318		c__Negativicutes	o__Selenomonadales	f__Veillonellaceae	g__Dialister	s__Dialister_micraerophilus
B-319		c__Negativicutes	o__Selenomonadales	f__Veillonellaceae	g__Megamonas	s__Megamonas_funiformis
B-320		c__Negativicutes	o__Selenomonadales	f__Veillonellaceae	g__Megamonas	s__Megamonas_hypermegale
B-321		c__Negativicutes	o__Selenomonadales	f__Veillonellaceae	g__Megamonas	s__Megamonas_rupellensis
B-322		c__Negativicutes	o__Selenomonadales	f__Veillonellaceae	g__Megamonas	s__Megamonas_unclassified
B-323		c__Negativicutes	o__Selenomonadales	f__Veillonellaceae	g__Megasphaera	s__Megasphaera_micronuciformis
B-324		c__Negativicutes	o__Selenomonadales	f__Veillonellaceae	g__Megasphaera	s__Megasphaera_unclassified
B-325		c__Negativicutes	o__Selenomonadales	f__Veillonellaceae	g__Mitsuokella	s__Mitsuokella_unclassified
B-326		c__Negativicutes	o__Selenomonadales	f__Acidaminococcaceae	g__Phascolarctobacterium	s__Phascolarctobacterium_succinatutens
B-327		c__Negativicutes	o__Selenomonadales	f__Veillonellaceae	g__Veillonella	s__Veillonella_atypica
B-328		c__Negativicutes	o__Selenomonadales	f__Veillonellaceae	g__Veillonella	s__Veillonella_dispar
B-329		c__Negativicutes	o__Selenomonadales	f__Veillonellaceae	g__Veillonella	s__Veillonella_parvula
B-330		c__Negativicutes	o__Selenomonadales	f__Veillonellaceae	g__Veillonella	s__Veillonella_ratti
B-331		c__Negativicutes	o__Selenomonadales	f__Veillonellaceae	g__Veillonella	s__Veillonella_unclassified
B-332		c__Fusobacteriia	o__Fusobacteriales	f__Fusobacteriaceae	g__Fusobacterium	s__Fusobacterium_mortiferum
B-333		c__Fusobacteriia	o__Fusobacteriales	f__Fusobacteriaceae	g__Fusobacterium	s__Fusobacterium_nucleatum
B-334		c__Fusobacteriia	o__Fusobacteriales	f__Fusobacteriaceae	g__Fusobacterium	s__Fusobacterium_periodonticum
B-335		c__Fusobacteriia	o__Fusobacteriales	f__Fusobacteriaceae	g__Fusobacterium	s__Fusobacterium_ulcerans
B-336		c__Betaproteobacteria	o__Burkholderiales	f__Burkholderiaceae	g__Burkholderia	s__Burkholderia_unclassified
B-337		c__Betaproteobacteria	o__Burkholderiales	f__Burkholderiales_noname	g__Burkholderiales_noname	s__Burkholderiales_bacterium_1_1_47
B-338		c__Betaproteobacteria	o__Burkholderiales	f__Comamonadaceae	g__Comamonas	s__Comamonas_unclassified
B-339		c__Betaproteobacteria	o__Neisseriales	f__Neisseriaceae	g__Kingella	s__Kingella_unclassified
B-340		c__Betaproteobacteria	o__Neisseriales	f__Neisseriaceae	g__Neisseria	s__Neisseria_unclassified
B-341		c__Betaproteobacteria	o__Burkholderiales	f__Oxalobacteraceae	g__Oxalobacter	s__Oxalobacter_formigenes
B-342		c__Betaproteobacteria	o__Burkholderiales	f__Sutterellaceae	g__Parasutterella	s__Parasutterella_excrementihominis
B-343		c__Betaproteobacteria	o__Burkholderiales	f__Sutterellaceae	g__Sutterella	s__Sutterella_wadsworthensis
B-344		c__Deltaproteobacteria	o__Desulfovibrionales	f__Desulfovibrionaceae	g__Bilophila	s__Bilophila_unclassified
B-345		c__Deltaproteobacteria	o__Desulfovibrionales	f__Desulfovibrionaceae	g__Bilophila	s__Bilophila_wadsworthia
B-346		c__Deltaproteobacteria	o__Desulfovibrionales	f__Desulfovibrionaceae	g__Desulfovibrio	s__Desulfovibrio_desulfuricans
B-347		c__Deltaproteobacteria	o__Desulfovibrionales	f__Desulfovibrionaceae	g__Desulfovibrio	s__Desulfovibrio_piger
B-348		c__Epsilonproteobacteria	o__Campylobacterales	f__Campylobacteraceae	g__Campylobacter	s__Campylobacter_concisus
B-349		c__Epsilonproteobacteria	o__Campylobacterales	f__Campylobacteraceae	g__Campylobacter	s__Campylobacter_gracilis
B-350		c__Epsilonproteobacteria	o__Campylobacterales	f__Campylobacteraceae	g__Campylobacter	s__Campylobacter_hominis
B-351		c__Epsilonproteobacteria	o__Campylobacterales	f__Campylobacteraceae	g__Campylobacter	s__Campylobacter_ureolyticus
B-352		c__Gammaproteobacteria	o__Pseudomonadales	f__Moraxellaceae	g__Acinetobacter	s__Acinetobacter_lwoffii
B-353		c__Gammaproteobacteria	o__Pasteurellales	f__Pasteurellaceae	g__Actinobacillus	s__Actinobacillus_unclassified
B-354		c__Gammaproteobacteria	o__Pasteurellales	f__Pasteurellaceae	g__Aggregatibacter	s__Aggregatibacter_segnis
B-355		c__Gammaproteobacteria	o__Pasteurellales	f__Pasteurellaceae	g__Aggregatibacter	s__Aggregatibacter_unclassified
B-356		c__Gammaproteobacteria	o__Enterobacteriales	f__Enterobacteriaceae	g__Citrobacter	s__Citrobacter_freundii
B-357		c__Gammaproteobacteria	o__Enterobacteriales	f__Enterobacteriaceae	g__Citrobacter	s__Citrobacter_unclassified
B-358		c__Gammaproteobacteria	o__Enterobacteriales	f__Enterobacteriaceae	g__Enterobacter	s__Enterobacter_aerogenes
B-359		c__Gammaproteobacteria	o__Enterobacteriales	f__Enterobacteriaceae	g__Enterobacter	s__Enterobacter_cloacae
B-360		c__Gammaproteobacteria	o__Enterobacteriales	f__Enterobacteriaceae	g__Enterobacteriaceae_noname	s__Enterobacteriaceae_bacterium_9_2_54FAA
B-361		c__Gammaproteobacteria	o__Enterobacteriales	f__Enterobacteriaceae	g__Escherichia	s__Escherichia_albertii
B-362		c__Gammaproteobacteria	o__Enterobacteriales	f__Enterobacteriaceae	g__Escherichia	s__Escherichia_coli
B-363		c__Gammaproteobacteria	o__Enterobacteriales	f__Enterobacteriaceae	g__Escherichia	s__Escherichia_sp_TW09276
B-364		c__Gammaproteobacteria	o__Enterobacteriales	f__Enterobacteriaceae	g__Escherichia	s__Escherichia_unclassified
B-365		c__Gammaproteobacteria	o__Pasteurellales	f__Pasteurellaceae	g__Haemophilus	s__Haemophilus_haemolyticus
B-366		c__Gammaproteobacteria	o__Pasteurellales	f__Pasteurellaceae	g__Haemophilus	s__Haemophilus_influenzae
B-367		c__Gammaproteobacteria	o__Pasteurellales	f__Pasteurellaceae	g__Haemophilus	s__Haemophilus_parainfluenzae
B-368		c__Gammaproteobacteria	o__Pasteurellales	f__Pasteurellaceae	g__Haemophilus	s__Haemophilus_paraphrohaemolyticus
B-369		c__Gammaproteobacteria	o__Pasteurellales	f__Pasteurellaceae	g__Haemophilus	s__Haemophilus_pittmaniae
B-370		c__Gammaproteobacteria	o__Pasteurellales	f__Pasteurellaceae	g__Haemophilus	s__Haemophilus_sputorum
B-371		c__Gammaproteobacteria	o__Enterobacteriales	f__Enterobacteriaceae	g__Hafnia	s__Hafnia_alvei
B-372		c__Gammaproteobacteria	o__Enterobacteriales	f__Enterobacteriaceae	g__Klebsiella	s__Klebsiella_oxytoca
B-373		c__Gammaproteobacteria	o__Enterobacteriales	f__Enterobacteriaceae	g__Klebsiella	s__Klebsiella_pneumoniae
B-374		c__Gammaproteobacteria	o__Enterobacteriales	f__Enterobacteriaceae	g__Klebsiella	s__Klebsiella_unclassified
B-375		c__Gammaproteobacteria	o__Enterobacteriales	f__Enterobacteriaceae	g__Morganella	s__Morganella_morganii
B-376		c__Gammaproteobacteria	o__Enterobacteriales	f__Enterobacteriaceae	g__Pantoea	s__Pantoea_ananatis
B-377		c__Gammaproteobacteria	o__Enterobacteriales	f__Enterobacteriaceae	g__Pantoea	s__Pantoea_unclassified
B-378		c__Gammaproteobacteria	o__Enterobacteriales	f__Enterobacteriaceae	g__Proteus	s__Proteus_mirabilis
B-379		c__Gammaproteobacteria	o__Enterobacteriales	f__Enterobacteriaceae	g__Proteus	s__Proteus_penneri
B-380		c__Gammaproteobacteria	o__Enterobacteriales	f__Enterobacteriaceae	g__Proteus	s__Proteus_unclassified
B-381		c__Gammaproteobacteria	o__Enterobacteriales	f__Enterobacteriaceae	g__Providencia	s__Providencia_unclassified
B-382		c__Gammaproteobacteria	o__Pseudomonadales	f__Pseudomonadaceae	g__Pseudomonas	s__Pseudomonas_aeruginosa
B-383		c__Gammaproteobacteria	o__Pseudomonadales	f__Pseudomonadaceae	g__Pseudomonas	s__Pseudomonas_mendocina
B-384		c__Gammaproteobacteria	o__Pseudomonadales	f__Pseudomonadaceae	g__Pseudomonas	s__Pseudomonas_unclassified
B-385		c__Gammaproteobacteria	o__Enterobacteriales	f__Enterobacteriaceae	g__Shigella	s__Shigella_flexneri
B-386		c__Gammaproteobacteria	o__Enterobacteriales	f__Enterobacteriaceae	g__Shigella	s__Shigella_sonnei
B-387		c__Spirochaetia	o__Spirochaetales	f__Brachyspiraceae	g__Brachyspira	s__Brachyspira_pilosicoli
B-388		c__Spirochaetia	o__Spirochaetales	f__Brachyspiraceae	g__Brachyspira	s__Brachyspira_unclassified
B-389		c__Spirochaetia	o__Spirochaetales	f__Spirochaetaceae	g__Treponema	s__Treponema_lecithinolyticum
B-390		c__Synergistia	o__Synergistales	f__Synergistaceae	g__Fretibacterium	s__Fretibacterium_fastidiosum
B-391		c__Synergistia	o__Synergistales	f__Synergistaceae	g__Jonquetella	s__Jonquetella_anthropi
B-392		c__Verrucomicrobiae	o__Verrucomicrobiales	f__Verrucomicrobiaceae	g__Akkermansia	s__Akkermansia_muciniphila
B-394		c__Bacteroidia	o__Bacteroidales	f__Bacteroidaceae	g__Bacteroides	s__Bacteroides_uniformis
B-395		c__Bacteroidia	o__Bacteroidales	f__Bacteroidaceae	g__Bacteroides	s__Bacteroides_vulgatus
V-1		Viruses|dsDNA viruses, no RNA stage|Caudovirales|Myoviridae|Ounavirinae|Unclassified|Enterobacteriaphage UAB_Phi87
V-2		Viruses|dsDNA viruses, no RNA stage|Caudovirales|Myoviridae|Ounavirinae|Unclassified|Escherichia phage EC6
V-3		Viruses|dsDNA viruses, no RNA stage|Caudovirales|Myoviridae|Ounavirinae|Unclassified|Escherichia phage vB_EcoM_AYO145A
V-4		Viruses|dsDNA viruses, no RNA stage|Caudovirales|Myoviridae|Ounavirinae|Unclassified|Escherichia phage vB_EcoM-VpaE1
V-5		Viruses|dsDNA viruses, no RNA stage|Caudovirales|Myoviridae|Ounavirinae|Unclassified|Escherichia phage wV8
V-6		Viruses|dsDNA viruses, no RNA stage|Caudovirales|Myoviridae|Ounavirinae|Unclassified|Salmonella phage vB_SPuM_SP116
V-7		Viruses|dsDNA viruses, no RNA stage|Caudovirales|Myoviridae|Peduovirinae|Hp1virus|Haemophilus phage HP1
V-8		Viruses|dsDNA viruses, no RNA stage|Caudovirales|Myoviridae|Peduovirinae|Hp1virus|Haemophilus phage HP2
V-9		Viruses|dsDNA viruses, no RNA stage|Caudovirales|Myoviridae|Peduovirinae|Hp1virus|Pasteurella phage F108
V-10		Viruses|dsDNA viruses, no RNA stage|Caudovirales|Myoviridae|Peduovirinae|P2virus|Enterobacteria phage fiAA91-ss
V-11		Viruses|dsDNA viruses, no RNA stage|Caudovirales|Myoviridae|Peduovirinae|P2virus|Enterobacteria phage P4
V-12		Viruses|dsDNA viruses, no RNA stage|Caudovirales|Myoviridae|Peduovirinae|P2virus|Enterobacteria phage WPhi
V-13		Viruses|dsDNA viruses, no RNA stage|Caudovirales|Myoviridae|Peduovirinae|P2virus|Escherichia phage pro147
V-14		Viruses|dsDNA viruses, no RNA stage|Caudovirales|Myoviridae|Peduovirinae|P2virus|Escherichia phage pro483
V-15		Viruses|dsDNA viruses, no RNA stage|Caudovirales|Myoviridae|Peduovirinae|P2virus|Escherichia virus 186
V-16		Viruses|dsDNA viruses, no RNA stage|Caudovirales|Myoviridae|Peduovirinae|P2virus|Escherichia virus P2
V-17		Viruses|dsDNA viruses, no RNA stage|Caudovirales|Myoviridae|Peduovirinae|P2virus|Salmonella phage FSL SP-004
V-18		Viruses|dsDNA viruses, no RNA stage|Caudovirales|Myoviridae|Peduovirinae|P2virus|Salmonella phage SEN1
V-19		Viruses|dsDNA viruses, no RNA stage|Caudovirales|Myoviridae|Peduovirinae|P2virus|Salmonella phage SEN4
V-20		Viruses|dsDNA viruses, no RNA stage|Caudovirales|Myoviridae|Peduovirinae|P2virus|Salmonella virus PsP3
V-21		Viruses|dsDNA viruses, no RNA stage|Caudovirales|Myoviridae|Peduovirinae|P2virus|Yersinia phage L-413C
V-22		Viruses|dsDNA viruses, no RNA stage|Caudovirales|Myoviridae|Spounavirinae|Kayvirus|Staphylococcus phage Team1
V-23		Viruses|dsDNA viruses, no RNA stage|Caudovirales|Myoviridae|Spounavirinae|Tsarbombavirus|Bacillus phage BCP78
V-24		Viruses|dsDNA viruses, no RNA stage|Caudovirales|Myoviridae|Spounavirinae|Tsarbombavirus|Bacillus phage TsarBomba
V-25		Viruses|dsDNA viruses, no RNA stage|Caudovirales|Myoviridae|Spounavirinae|unclassified Twortlikevirus|Staphylococcus phage vB_SauM_Remus
V-26		Viruses|dsDNA viruses, no RNA stage|Caudovirales|Myoviridae|Tevenvirinae|Jd18virus|Klebsiella phage JD18
V-27		Viruses|dsDNA viruses, no RNA stage|Caudovirales|Myoviridae|Tevenvirinae|Jd18virus|Klebsiella phage PKO111
V-28		Viruses|dsDNA viruses, no RNA stage|Caudovirales|Myoviridae|Tevenvirinae|Kp15virus|Klebsiella phage KP15
V-29		Viruses|dsDNA viruses, no RNA stage|Caudovirales|Myoviridae|Tevenvirinae|Kp15virus|Klebsiella phage KP27
V-30		Viruses|dsDNA viruses, no RNA stage|Caudovirales|Myoviridae|Tevenvirinae|Kp15virus|Klebsiella phage Matisse
V-31		Viruses|dsDNA viruses, no RNA stage|Caudovirales|Myoviridae|Tevenvirinae|Moonvirus|Citrobacter phage Merlin
V-32		Viruses|dsDNA viruses, no RNA stage|Caudovirales|Myoviridae|Tevenvirinae|Moonvirus|Citrobacter phage Moon
V-33		Viruses|dsDNA viruses, no RNA stage|Caudovirales|Myoviridae|Tevenvirinae|Rb49virus|Enterobacteria phage Phi1
V-34		Viruses|dsDNA viruses, no RNA stage|Caudovirales|Myoviridae|Tevenvirinae|S16virus|Salmonella phage STML-198
V-35		Viruses|dsDNA viruses, no RNA stage|Caudovirales|Myoviridae|Tevenvirinae|Schizot4virus|Vibrio phage nt-1
V-36		Viruses|dsDNA viruses, no RNA stage|Caudovirales|Myoviridae|Tevenvirinae|Schizot4virus|Vibrio phage ValKK3
V-37		Viruses|dsDNA viruses, no RNA stage|Caudovirales|Myoviridae|Tevenvirinae|Sp18virus|Escherichia phage vB_EcoM_VR26
V-38		Viruses|dsDNA viruses, no RNA stage|Caudovirales|Myoviridae|Tevenvirinae|T4virus|Acinetobacter phage Acj9
V-39		Viruses|dsDNA viruses, no RNA stage|Caudovirales|Myoviridae|Tevenvirinae|T4virus|Aeromonas phage phiAS5
V-40		Viruses|dsDNA viruses, no RNA stage|Caudovirales|Myoviridae|Tevenvirinae|T4virus|Aeromonas phage PX29
V-41		Viruses|dsDNA viruses, no RNA stage|Caudovirales|Myoviridae|Tevenvirinae|T4virus|Aeromonas virus Aeh1
V-42		Viruses|dsDNA viruses, no RNA stage|Caudovirales|Myoviridae|Tevenvirinae|T4virus|Citrobacter phage Margaery
V-43		Viruses|dsDNA viruses, no RNA stage|Caudovirales|Myoviridae|Tevenvirinae|T4virus|Enterobacteria phage GEC-3S
V-44		Viruses|dsDNA viruses, no RNA stage|Caudovirales|Myoviridae|Tevenvirinae|T4virus|Enterobacteria phage RB3
V-45		Viruses|dsDNA viruses, no RNA stage|Caudovirales|Myoviridae|Tevenvirinae|T4virus|Escherichia phage slur02
V-46		Viruses|dsDNA viruses, no RNA stage|Caudovirales|Myoviridae|Tevenvirinae|T4virus|Escherichia phage slur14
V-47		Viruses|dsDNA viruses, no RNA stage|Caudovirales|Myoviridae|Tevenvirinae|T4virus|Prochlorococcus phage P-SSM2
V-48		Viruses|dsDNA viruses, no RNA stage|Caudovirales|Myoviridae|Tevenvirinae|T4virus|Proteus phage vB_PmiM_Pm5461
V-49		Viruses|dsDNA viruses, no RNA stage|Caudovirales|Myoviridae|Tevenvirinae|T4virus|Salmonella phage STP4-a
V-50		Viruses|dsDNA viruses, no RNA stage|Caudovirales|Myoviridae|Tevenvirinae|T4virus|Shigella phage SHBML-50-1
V-51		Viruses|dsDNA viruses, no RNA stage|Caudovirales|Myoviridae|Tevenvirinae|T4virus|Shigella phage Shfl2
V-52		Viruses|dsDNA viruses, no RNA stage|Caudovirales|Myoviridae|Tevenvirinae|T4virus|Synechococcus phage S-RSM4
V-53		Viruses|dsDNA viruses, no RNA stage|Caudovirales|Myoviridae|unassigned Spounavirinae|Unclassified|Enterococcus phage phiEF24C
V-54		Viruses|dsDNA viruses, no RNA stage|Caudovirales|Myoviridae|unassigned Spounavirinae|Unclassified|Lactobacillus virus Lb338-1
V-55		Viruses|dsDNA viruses, no RNA stage|Caudovirales|Myoviridae|unclassified Spounavirinae|Unclassified|Brochothrix phage A9
V-56		Viruses|dsDNA viruses, no RNA stage|Caudovirales|Myoviridae|Unclassified|Biquartavirus|Aeromonas virus 44RR2
V-57		Viruses|dsDNA viruses, no RNA stage|Caudovirales|Myoviridae|Unclassified|Bxz1virus|Mycobacterium phage ArcherS7
V-58		Viruses|dsDNA viruses, no RNA stage|Caudovirales|Myoviridae|Unclassified|Bxz1virus|Mycobacterium phage Breeniome
V-59		Viruses|dsDNA viruses, no RNA stage|Caudovirales|Myoviridae|Unclassified|Bxz1virus|Mycobacterium phage LinStu
V-60		Viruses|dsDNA viruses, no RNA stage|Caudovirales|Myoviridae|Unclassified|Cd119virus|Clostridium virus phiC2
V-61		Viruses|dsDNA viruses, no RNA stage|Caudovirales|Myoviridae|Unclassified|Cd119virus|Clostridium virus phiCD119
V-62		Viruses|dsDNA viruses, no RNA stage|Caudovirales|Myoviridae|Unclassified|Cd119virus|Clostridium virus phiCD27
V-63		Viruses|dsDNA viruses, no RNA stage|Caudovirales|Myoviridae|Unclassified|Cp220virus|Campylobacter virus CP21
V-64		Viruses|dsDNA viruses, no RNA stage|Caudovirales|Myoviridae|Unclassified|Muvirus|Escherichia virus Mu
V-65		Viruses|dsDNA viruses, no RNA stage|Caudovirales|Myoviridae|Unclassified|Muvirus|Shigella phage SfMu
V-66		Viruses|dsDNA viruses, no RNA stage|Caudovirales|Myoviridae|Unclassified|P1virus|Escherichia virus P1
V-67		Viruses|dsDNA viruses, no RNA stage|Caudovirales|Myoviridae|Unclassified|Phikzvirus|Pseudomonas phage phiKZ
V-68		Viruses|dsDNA viruses, no RNA stage|Caudovirales|Myoviridae|Unclassified|Sep1virus|Staphylococcus phage phiIPLA-C1C
V-69		Viruses|dsDNA viruses, no RNA stage|Caudovirales|Myoviridae|Unclassified|unclassified Cd119virus|Clostridium phage phiCDHM11
V-70		Viruses|dsDNA viruses, no RNA stage|Caudovirales|Myoviridae|Unclassified|unclassified Punalikevirus|Salmonella phage SJ46
V-71		Viruses|dsDNA viruses, no RNA stage|Caudovirales|Myoviridae|Unclassified|Unclassified|Aggregatibacter phage S1249
V-72		Viruses|dsDNA viruses, no RNA stage|Caudovirales|Myoviridae|Unclassified|Unclassified|Bacillus phage 0305phi8-36
V-73		Viruses|dsDNA viruses, no RNA stage|Caudovirales|Myoviridae|Unclassified|Unclassified|Bacillus phage AR9
V-74		Viruses|dsDNA viruses, no RNA stage|Caudovirales|Myoviridae|Unclassified|Unclassified|Bacillus phage Bp8p-C
V-75		Viruses|dsDNA viruses, no RNA stage|Caudovirales|Myoviridae|Unclassified|Unclassified|Bacillus phage Mater
V-76		Viruses|dsDNA viruses, no RNA stage|Caudovirales|Myoviridae|Unclassified|Unclassified|Bacillus phage Moonbeam
V-77		Viruses|dsDNA viruses, no RNA stage|Caudovirales|Myoviridae|Unclassified|Unclassified|Bacillus phage phiAGATE
V-78		Viruses|dsDNA viruses, no RNA stage|Caudovirales|Myoviridae|Unclassified|Unclassified|Bacillus phage Shbh1
V-79		Viruses|dsDNA viruses, no RNA stage|Caudovirales|Myoviridae|Unclassified|Unclassified|Bacillus virus G
V-80		Viruses|dsDNA viruses, no RNA stage|Caudovirales|Myoviridae|Unclassified|Unclassified|Clostridium phage CDMH1
V-81		Viruses|dsDNA viruses, no RNA stage|Caudovirales|Myoviridae|Unclassified|Unclassified|Clostridium phage c-st
V-82		Viruses|dsDNA viruses, no RNA stage|Caudovirales|Myoviridae|Unclassified|Unclassified|Clostridium phage phiCD211
V-83		Viruses|dsDNA viruses, no RNA stage|Caudovirales|Myoviridae|Unclassified|Unclassified|Clostridium phage phiCD481-1
V-84		Viruses|dsDNA viruses, no RNA stage|Caudovirales|Myoviridae|Unclassified|Unclassified|Clostridium phage phiCD505
V-85		Viruses|dsDNA viruses, no RNA stage|Caudovirales|Myoviridae|Unclassified|Unclassified|Clostridium phage phiCD506
V-86		Viruses|dsDNA viruses, no RNA stage|Caudovirales|Myoviridae|Unclassified|Unclassified|Clostridium phage phiCDHM13
V-87		Viruses|dsDNA viruses, no RNA stage|Caudovirales|Myoviridae|Unclassified|Unclassified|Clostridium phage phiCDHM19
V-88		Viruses|dsDNA viruses, no RNA stage|Caudovirales|Myoviridae|Unclassified|Unclassified|Clostridium phage phiMMP01
V-89		Viruses|dsDNA viruses, no RNA stage|Caudovirales|Myoviridae|Unclassified|Unclassified|Clostridium phage phiMMP02
V-90		Viruses|dsDNA viruses, no RNA stage|Caudovirales|Myoviridae|Unclassified|Unclassified|Clostridium phage phiMMP03
V-91		Viruses|dsDNA viruses, no RNA stage|Caudovirales|Myoviridae|Unclassified|Unclassified|Clostridium phage phiMMP04
V-92		Viruses|dsDNA viruses, no RNA stage|Caudovirales|Myoviridae|Unclassified|Unclassified|Cronobacter phage CR5
V-93		Viruses|dsDNA viruses, no RNA stage|Caudovirales|Myoviridae|Unclassified|Unclassified|Cronobacter phage ENT47670
V-94		Viruses|dsDNA viruses, no RNA stage|Caudovirales|Myoviridae|Unclassified|Unclassified|Cronobacter phage S13
V-95		Viruses|dsDNA viruses, no RNA stage|Caudovirales|Myoviridae|Unclassified|Unclassified|Cronobacter phage vB_CsaM_GAP32
V-96		Viruses|dsDNA viruses, no RNA stage|Caudovirales|Myoviridae|Unclassified|Unclassified|Cyanophage S-RIM32
V-97		Viruses|dsDNA viruses, no RNA stage|Caudovirales|Myoviridae|Unclassified|Unclassified|Cyanophage S-RIM50
V-98		Viruses|dsDNA viruses, no RNA stage|Caudovirales|Myoviridae|Unclassified|Unclassified|Cyanophage S-TIM5
V-99		Viruses|dsDNA viruses, no RNA stage|Caudovirales|Myoviridae|Unclassified|Unclassified|Edwardsiella phage GF-2
V-100		Viruses|dsDNA viruses, no RNA stage|Caudovirales|Myoviridae|Unclassified|Unclassified|Edwardsiella phage MSW-3
V-101		Viruses|dsDNA viruses, no RNA stage|Caudovirales|Myoviridae|Unclassified|Unclassified|Edwardsiella phage PEi21
V-102		Viruses|dsDNA viruses, no RNA stage|Caudovirales|Myoviridae|Unclassified|Unclassified|Enterobacter phage Arya
V-103		Viruses|dsDNA viruses, no RNA stage|Caudovirales|Myoviridae|Unclassified|Unclassified|Enterobacteria phage P88
V-104		Viruses|dsDNA viruses, no RNA stage|Caudovirales|Myoviridae|Unclassified|Unclassified|Enterobacteria phage phi92
V-105		Viruses|dsDNA viruses, no RNA stage|Caudovirales|Myoviridae|Unclassified|Unclassified|Enterobacteria phage phiP27
V-106		Viruses|dsDNA viruses, no RNA stage|Caudovirales|Myoviridae|Unclassified|Unclassified|Enterobacteria phage SfI
V-107		Viruses|dsDNA viruses, no RNA stage|Caudovirales|Myoviridae|Unclassified|Unclassified|Enterobacteria phage SfV
V-108		Viruses|dsDNA viruses, no RNA stage|Caudovirales|Myoviridae|Unclassified|Unclassified|Enterococcus phage ECP3
V-109		Viruses|dsDNA viruses, no RNA stage|Caudovirales|Myoviridae|Unclassified|Unclassified|Enterococcus phage EFDG1
V-110		Viruses|dsDNA viruses, no RNA stage|Caudovirales|Myoviridae|Unclassified|Unclassified|Enterococcus phage EFLK1
V-111		Viruses|dsDNA viruses, no RNA stage|Caudovirales|Myoviridae|Unclassified|Unclassified|Erwinia phage Ea35-70
V-112		Viruses|dsDNA viruses, no RNA stage|Caudovirales|Myoviridae|Unclassified|Unclassified|Erwinia phage ENT90
V-113		Viruses|dsDNA viruses, no RNA stage|Caudovirales|Myoviridae|Unclassified|Unclassified|Erwinia phage vB_EamM_ChrisDB
V-114		Viruses|dsDNA viruses, no RNA stage|Caudovirales|Myoviridae|Unclassified|Unclassified|Erwinia phage vB_EamM_Huxley
V-115		Viruses|dsDNA viruses, no RNA stage|Caudovirales|Myoviridae|Unclassified|Unclassified|Erwinia phage vB_EamM_Kwan
V-116		Viruses|dsDNA viruses, no RNA stage|Caudovirales|Myoviridae|Unclassified|Unclassified|Escherichia phage Av-05
V-117		Viruses|dsDNA viruses, no RNA stage|Caudovirales|Myoviridae|Unclassified|Unclassified|Escherichia phage D108
V-118		Viruses|dsDNA viruses, no RNA stage|Caudovirales|Myoviridae|Unclassified|Unclassified|Escherichia phage ECML-117
V-119		Viruses|dsDNA viruses, no RNA stage|Caudovirales|Myoviridae|Unclassified|Unclassified|Escherichia phage vB_EcoM_Alf5
V-120		Viruses|dsDNA viruses, no RNA stage|Caudovirales|Myoviridae|Unclassified|Unclassified|Escherichia phage vB_EcoM-UFV13
V-121		Viruses|dsDNA viruses, no RNA stage|Caudovirales|Myoviridae|Unclassified|Unclassified|Flavobacterium phage FCL-2
V-122		Viruses|dsDNA viruses, no RNA stage|Caudovirales|Myoviridae|Unclassified|Unclassified|Haemophilus phage Aaphi23
V-123		Viruses|dsDNA viruses, no RNA stage|Caudovirales|Myoviridae|Unclassified|Unclassified|Haemophilus phage SuMu
V-124		Viruses|dsDNA viruses, no RNA stage|Caudovirales|Myoviridae|Unclassified|Unclassified|Iodobacteriophage phiPLPE
V-125		Viruses|dsDNA viruses, no RNA stage|Caudovirales|Myoviridae|Unclassified|Unclassified|Klebsiella phage vB_KpnM_KpV477
V-126		Viruses|dsDNA viruses, no RNA stage|Caudovirales|Myoviridae|Unclassified|Unclassified|Lactobacillus phage KC5a
V-127		Viruses|dsDNA viruses, no RNA stage|Caudovirales|Myoviridae|Unclassified|Unclassified|Lactobacillus phage LfeInf
V-128		Viruses|dsDNA viruses, no RNA stage|Caudovirales|Myoviridae|Unclassified|Unclassified|Lactobacillus phage phi jlb1
V-129		Viruses|dsDNA viruses, no RNA stage|Caudovirales|Myoviridae|Unclassified|Unclassified|Lactobacillus phage phiAQ113
V-130		Viruses|dsDNA viruses, no RNA stage|Caudovirales|Myoviridae|Unclassified|Unclassified|Mannheimia phage vB_MhM_3927AP2
V-131		Viruses|dsDNA viruses, no RNA stage|Caudovirales|Myoviridae|Unclassified|Unclassified|Morganella phage vB_MmoM_MP1
V-132		Viruses|dsDNA viruses, no RNA stage|Caudovirales|Myoviridae|Unclassified|Unclassified|Mycobacterium phage Myrna
V-133		Viruses|dsDNA viruses, no RNA stage|Caudovirales|Myoviridae|Unclassified|Unclassified|Mycobacterium phage Tonenili
V-134		Viruses|dsDNA viruses, no RNA stage|Caudovirales|Myoviridae|Unclassified|Unclassified|Pectobacterium phage ZF40
V-135		Viruses|dsDNA viruses, no RNA stage|Caudovirales|Myoviridae|Unclassified|Unclassified|Pseudomonas phage OBP
V-136		Viruses|dsDNA viruses, no RNA stage|Caudovirales|Myoviridae|Unclassified|Unclassified|Pseudomonas phage PaBG
V-137		Viruses|dsDNA viruses, no RNA stage|Caudovirales|Myoviridae|Unclassified|Unclassified|Pseudomonas phage phi3
V-138		Viruses|dsDNA viruses, no RNA stage|Caudovirales|Myoviridae|Unclassified|Unclassified|Pseudomonas phage PPpW-3
V-139		Viruses|dsDNA viruses, no RNA stage|Caudovirales|Myoviridae|Unclassified|Unclassified|Pseudomonas phage VCM
V-140		Viruses|dsDNA viruses, no RNA stage|Caudovirales|Myoviridae|Unclassified|Unclassified|Salmonella phage RE-2010
V-141		Viruses|dsDNA viruses, no RNA stage|Caudovirales|Myoviridae|Unclassified|Unclassified|Salmonella phage SEN34
V-142		Viruses|dsDNA viruses, no RNA stage|Caudovirales|Myoviridae|Unclassified|Unclassified|Salmonella phage SEN5
V-143		Viruses|dsDNA viruses, no RNA stage|Caudovirales|Myoviridae|Unclassified|Unclassified|Serratia phage phiMAM1
V-144		Viruses|dsDNA viruses, no RNA stage|Caudovirales|Myoviridae|Unclassified|Unclassified|Shewanella sp. phage 1/4
V-145		Viruses|dsDNA viruses, no RNA stage|Caudovirales|Myoviridae|Unclassified|Unclassified|Shigella phage SfII
V-146		Viruses|dsDNA viruses, no RNA stage|Caudovirales|Myoviridae|Unclassified|Unclassified|Shigella phage SfIV
V-147		Viruses|dsDNA viruses, no RNA stage|Caudovirales|Myoviridae|Unclassified|Unclassified|Sphingomonas phage PAU
V-148		Viruses|dsDNA viruses, no RNA stage|Caudovirales|Myoviridae|Unclassified|Unclassified|Staphylococcus phage SA1
V-149		Viruses|dsDNA viruses, no RNA stage|Caudovirales|Myoviridae|Unclassified|Unclassified|Streptococcus phage EJ-1
V-150		Viruses|dsDNA viruses, no RNA stage|Caudovirales|Myoviridae|Unclassified|Unclassified|Synechococcus phage S-IOM18
V-151		Viruses|dsDNA viruses, no RNA stage|Caudovirales|Myoviridae|Unclassified|Unclassified|Synechococcus phage S-RIM8 A.HR1
V-152		Viruses|dsDNA viruses, no RNA stage|Caudovirales|Myoviridae|Unclassified|Unclassified|Synechococcus phage S-SM1
V-153		Viruses|dsDNA viruses, no RNA stage|Caudovirales|Myoviridae|Unclassified|Unclassified|Synechococcus phage S-SM2
V-154		Viruses|dsDNA viruses, no RNA stage|Caudovirales|Myoviridae|Unclassified|Unclassified|Synechococcus phage S-SSM7
V-155		Viruses|dsDNA viruses, no RNA stage|Caudovirales|Myoviridae|Unclassified|Unclassified|Synechococcus phage S-WAM2
V-156		Viruses|dsDNA viruses, no RNA stage|Caudovirales|Myoviridae|Unclassified|Unclassified|Thermus phage TMA
V-157		Viruses|dsDNA viruses, no RNA stage|Caudovirales|Myoviridae|Unclassified|Unclassified|Yersinia phage phiR1-37
V-158		Viruses|dsDNA viruses, no RNA stage|Caudovirales|Myoviridae|Unclassified|Unclassified|Yersinia phage phiR1-RT
V-159		Viruses|dsDNA viruses, no RNA stage|Caudovirales|Podoviridae|Autographivirinae|T7virus|Citrobacter phage SH3
V-160		Viruses|dsDNA viruses, no RNA stage|Caudovirales|Podoviridae|Autographivirinae|T7virus|Enterobacteria phage EcoDS1
V-161		Viruses|dsDNA viruses, no RNA stage|Caudovirales|Podoviridae|Autographivirinae|T7virus|Enterobacteria phage K1F
V-162		Viruses|dsDNA viruses, no RNA stage|Caudovirales|Podoviridae|Autographivirinae|T7virus|Escherichia phage vB_EcoP_GA2A
V-163		Viruses|dsDNA viruses, no RNA stage|Caudovirales|Podoviridae|Autographivirinae|T7virus|Vibrio phage N4
V-164		Viruses|dsDNA viruses, no RNA stage|Caudovirales|Podoviridae|Picovirinae|Cp1virus|Streptococcus phage Cp-1
V-165		Viruses|dsDNA viruses, no RNA stage|Caudovirales|Podoviridae|Sepvirinae|Nona33virus|Enterobacteria phage 933W
V-166		Viruses|dsDNA viruses, no RNA stage|Caudovirales|Podoviridae|Sepvirinae|Nona33virus|Escherichia phage Min27
V-167		Viruses|dsDNA viruses, no RNA stage|Caudovirales|Podoviridae|Sepvirinae|Nona33virus|Escherichia phage Stx2 II
V-168		Viruses|dsDNA viruses, no RNA stage|Caudovirales|Podoviridae|Sepvirinae|Nona33virus|Escherichia phage vB_EcoP_24B
V-169		Viruses|dsDNA viruses, no RNA stage|Caudovirales|Podoviridae|Sepvirinae|Pocjvirus|Shigella phage 75/02 Stx
V-170		Viruses|dsDNA viruses, no RNA stage|Caudovirales|Podoviridae|Sepvirinae|Pocjvirus|Shigella phage POCJ13
V-171		Viruses|dsDNA viruses, no RNA stage|Caudovirales|Podoviridae|Sepvirinae|Tl2011virus|Escherichia phage PA2
V-172		Viruses|dsDNA viruses, no RNA stage|Caudovirales|Podoviridae|Sepvirinae|Tl2011virus|Escherichia phage phi191
V-173		Viruses|dsDNA viruses, no RNA stage|Caudovirales|Podoviridae|Sepvirinae|Tl2011virus|Escherichia phage TL-2011c
V-174		Viruses|dsDNA viruses, no RNA stage|Caudovirales|Podoviridae|Sepvirinae|Tl2011virus|Shigella phage Ss-VASD
V-175		Viruses|dsDNA viruses, no RNA stage|Caudovirales|Podoviridae|unassigned Picovirinae|Unclassified|Actinomyces virus Av1
V-176		Viruses|dsDNA viruses, no RNA stage|Caudovirales|Podoviridae|unclassified Autographivirinae|Unclassified|Escherichia phage LM33_P1
V-177		Viruses|dsDNA viruses, no RNA stage|Caudovirales|Podoviridae|Unclassified|N4virus|Escherichia phage N4
V-178		Viruses|dsDNA viruses, no RNA stage|Caudovirales|Podoviridae|Unclassified|P22virus|Enterobacteria phage ST104
V-179		Viruses|dsDNA viruses, no RNA stage|Caudovirales|Podoviridae|Unclassified|P22virus|Enterobacteria phage UAB_Phi20
V-180		Viruses|dsDNA viruses, no RNA stage|Caudovirales|Podoviridae|Unclassified|P22virus|Salmonella phage epsilon34
V-181		Viruses|dsDNA viruses, no RNA stage|Caudovirales|Podoviridae|Unclassified|P22virus|Salmonella phage g341c
V-182		Viruses|dsDNA viruses, no RNA stage|Caudovirales|Podoviridae|Unclassified|P22virus|Salmonella phage HK620
V-183		Viruses|dsDNA viruses, no RNA stage|Caudovirales|Podoviridae|Unclassified|P22virus|Salmonella phage SE1
V-184		Viruses|dsDNA viruses, no RNA stage|Caudovirales|Podoviridae|Unclassified|P22virus|Salmonella phage ST160
V-185		Viruses|dsDNA viruses, no RNA stage|Caudovirales|Podoviridae|Unclassified|P22virus|Salmonella phage ST64T
V-186		Viruses|dsDNA viruses, no RNA stage|Caudovirales|Podoviridae|Unclassified|P22virus|Salmonella phage vB_SemP_Emek
V-187		Viruses|dsDNA viruses, no RNA stage|Caudovirales|Podoviridae|Unclassified|P22virus|Salmonella virus P22
V-188		Viruses|dsDNA viruses, no RNA stage|Caudovirales|Podoviridae|Unclassified|P22virus|Shigella phage Sf6
V-189		Viruses|dsDNA viruses, no RNA stage|Caudovirales|Podoviridae|Unclassified|unclassified Epsilon15likevirus|Escherichia phage TL-2011b
V-190		Viruses|dsDNA viruses, no RNA stage|Caudovirales|Podoviridae|Unclassified|unclassified N4likevirus|Salmonella phage FSL SP-076
V-191		Viruses|dsDNA viruses, no RNA stage|Caudovirales|Podoviridae|Unclassified|Unclassified|Delftia phage RG-2014
V-192		Viruses|dsDNA viruses, no RNA stage|Caudovirales|Podoviridae|Unclassified|Unclassified|Enterobacter phage Tyrion
V-193		Viruses|dsDNA viruses, no RNA stage|Caudovirales|Podoviridae|Unclassified|Unclassified|Enterobacteria phage IME10
V-194		Viruses|dsDNA viruses, no RNA stage|Caudovirales|Podoviridae|Unclassified|Unclassified|Enterobacteria phage Sf101
V-195		Viruses|dsDNA viruses, no RNA stage|Caudovirales|Podoviridae|Unclassified|Unclassified|Enterobacteria phage VT2phi_272
V-196		Viruses|dsDNA viruses, no RNA stage|Caudovirales|Podoviridae|Unclassified|Unclassified|Enterobacteria phage VT2-Sakai
V-197		Viruses|dsDNA viruses, no RNA stage|Caudovirales|Podoviridae|Unclassified|Unclassified|Escherichia phage P13374
V-198		Viruses|dsDNA viruses, no RNA stage|Caudovirales|Podoviridae|Unclassified|Unclassified|Escherichia phage phiV10
V-199		Viruses|dsDNA viruses, no RNA stage|Caudovirales|Podoviridae|Unclassified|Unclassified|Escherichia phage Pollock
V-200		Viruses|dsDNA viruses, no RNA stage|Caudovirales|Podoviridae|Unclassified|Unclassified|Escherichia Stx1 converting phage
V-201		Viruses|dsDNA viruses, no RNA stage|Caudovirales|Podoviridae|Unclassified|Unclassified|Hamiltonella virus APSE1
V-202		Viruses|dsDNA viruses, no RNA stage|Caudovirales|Podoviridae|Unclassified|Unclassified|Pectobacterium phage PP90
V-203		Viruses|dsDNA viruses, no RNA stage|Caudovirales|Podoviridae|Unclassified|Unclassified|Salmonella phage 103203_sal5
V-204		Viruses|dsDNA viruses, no RNA stage|Caudovirales|Podoviridae|Unclassified|Unclassified|Salmonella phage 118970_sal4
V-205		Viruses|dsDNA viruses, no RNA stage|Caudovirales|Podoviridae|Unclassified|Unclassified|Salmonella phage 9NA
V-206		Viruses|dsDNA viruses, no RNA stage|Caudovirales|Podoviridae|Unclassified|Unclassified|Salmonella phage epsilon15
V-207		Viruses|dsDNA viruses, no RNA stage|Caudovirales|Podoviridae|Unclassified|Unclassified|Salmonella phage SEN22
V-208		Viruses|dsDNA viruses, no RNA stage|Caudovirales|Podoviridae|Unclassified|Unclassified|Salmonella phage SPN1S
V-209		Viruses|dsDNA viruses, no RNA stage|Caudovirales|Podoviridae|Unclassified|Unclassified|Salmonella phage SPN9CC
V-210		Viruses|dsDNA viruses, no RNA stage|Caudovirales|Podoviridae|Unclassified|Unclassified|Streptococcus phage Str-PAP-1
V-211		Viruses|dsDNA viruses, no RNA stage|Caudovirales|Podoviridae|Unclassified|Unclassified|Stx2-converting phage 86
V-212		Viruses|dsDNA viruses, no RNA stage|Caudovirales|Podoviridae|Unclassified|Unclassified|Vibrio phage phi 1
V-213		Viruses|dsDNA viruses, no RNA stage|Caudovirales|Siphoviridae|Guernseyvirinae|Jerseyvirus|Salmonella phage Ent1
V-214		Viruses|dsDNA viruses, no RNA stage|Caudovirales|Siphoviridae|Guernseyvirinae|Jerseyvirus|Salmonella phage Jersey
V-215		Viruses|dsDNA viruses, no RNA stage|Caudovirales|Siphoviridae|Guernseyvirinae|Jerseyvirus|Salmonella phage L13
V-216		Viruses|dsDNA viruses, no RNA stage|Caudovirales|Siphoviridae|Guernseyvirinae|Jerseyvirus|Salmonella phage LSPA1
V-217		Viruses|dsDNA viruses, no RNA stage|Caudovirales|Siphoviridae|Guernseyvirinae|Jerseyvirus|Salmonella phage SE2
V-218		Viruses|dsDNA viruses, no RNA stage|Caudovirales|Siphoviridae|Guernseyvirinae|Jerseyvirus|Salmonella phage SETP13
V-219		Viruses|dsDNA viruses, no RNA stage|Caudovirales|Siphoviridae|Guernseyvirinae|Jerseyvirus|Salmonella phage SETP3
V-220		Viruses|dsDNA viruses, no RNA stage|Caudovirales|Siphoviridae|Guernseyvirinae|Jerseyvirus|Salmonella phage SS3e
V-221		Viruses|dsDNA viruses, no RNA stage|Caudovirales|Siphoviridae|Guernseyvirinae|K1gvirus|Escherichia phage K1-dep(1)
V-222		Viruses|dsDNA viruses, no RNA stage|Caudovirales|Siphoviridae|Guernseyvirinae|K1gvirus|Escherichia phage K1-dep(4)
V-223		Viruses|dsDNA viruses, no RNA stage|Caudovirales|Siphoviridae|Tunavirinae|Kp36virus|Klebsiella phage 1513
V-224		Viruses|dsDNA viruses, no RNA stage|Caudovirales|Siphoviridae|Tunavirinae|Kp36virus|Klebsiella phage KLPN1
V-225		Viruses|dsDNA viruses, no RNA stage|Caudovirales|Siphoviridae|Tunavirinae|Kp36virus|Klebsiella phage KP36
V-226		Viruses|dsDNA viruses, no RNA stage|Caudovirales|Siphoviridae|Tunavirinae|Kp36virus|Klebsiella phage PKP126
V-227		Viruses|dsDNA viruses, no RNA stage|Caudovirales|Siphoviridae|Tunavirinae|Kp36virus|Klebsiella phage Sushi
V-228		Viruses|dsDNA viruses, no RNA stage|Caudovirales|Siphoviridae|Tunavirinae|Rtpvirus|Escherichia phage vB_Eco_ACG-M12
V-229		Viruses|dsDNA viruses, no RNA stage|Caudovirales|Siphoviridae|Tunavirinae|T1virus|Escherichia phage ADB-2
V-230		Viruses|dsDNA viruses, no RNA stage|Caudovirales|Siphoviridae|Tunavirinae|T1virus|Shigella virus Shfl1
V-231		Viruses|dsDNA viruses, no RNA stage|Caudovirales|Siphoviridae|Tunavirinae|Tlsvirus|Citrobacter virus Stevie
V-232		Viruses|dsDNA viruses, no RNA stage|Caudovirales|Siphoviridae|Tunavirinae|Tlsvirus|Escherichia virus TLS
V-233		Viruses|dsDNA viruses, no RNA stage|Caudovirales|Siphoviridae|Tunavirinae|unclassified Tunalikevirus|Cronobacter virus ESP29491
V-234		Viruses|dsDNA viruses, no RNA stage|Caudovirales|Siphoviridae|Unclassified|C2likevirus|Lactococcus phage bIL67
V-235		Viruses|dsDNA viruses, no RNA stage|Caudovirales|Siphoviridae|Unclassified|C2virus|Lactococcus phage D4410
V-236		Viruses|dsDNA viruses, no RNA stage|Caudovirales|Siphoviridae|Unclassified|C2virus|Lactococcus phage D4412
V-237		Viruses|dsDNA viruses, no RNA stage|Caudovirales|Siphoviridae|Unclassified|C2virus|Lactococcus phage M5938
V-238		Viruses|dsDNA viruses, no RNA stage|Caudovirales|Siphoviridae|Unclassified|C2virus|Lactococcus phage M6162
V-239		Viruses|dsDNA viruses, no RNA stage|Caudovirales|Siphoviridae|Unclassified|C2virus|Lactococcus phage M6165
V-240		Viruses|dsDNA viruses, no RNA stage|Caudovirales|Siphoviridae|Unclassified|C2virus|Lactococcus virus c2
V-241		Viruses|dsDNA viruses, no RNA stage|Caudovirales|Siphoviridae|Unclassified|Cecivirus|Bacillus virus 250
V-242		Viruses|dsDNA viruses, no RNA stage|Caudovirales|Siphoviridae|Unclassified|Cecivirus|Bacillus virus IEBH
V-243		Viruses|dsDNA viruses, no RNA stage|Caudovirales|Siphoviridae|Unclassified|Eiauvirus|Edwardsiella phage eiAU-183
V-244		Viruses|dsDNA viruses, no RNA stage|Caudovirales|Siphoviridae|Unclassified|Jwxvirus|Achromobacter phage JWX
V-245		Viruses|dsDNA viruses, no RNA stage|Caudovirales|Siphoviridae|Unclassified|L5virus|Mycobacterium virus Pukovnik
V-246		Viruses|dsDNA viruses, no RNA stage|Caudovirales|Siphoviridae|Unclassified|L5virus|Rhodococcus phage RGL3
V-247		Viruses|dsDNA viruses, no RNA stage|Caudovirales|Siphoviridae|Unclassified|Lambdavirus|Escherichia virus HK022
V-248		Viruses|dsDNA viruses, no RNA stage|Caudovirales|Siphoviridae|Unclassified|Lambdavirus|Escherichia virus HK97
V-249		Viruses|dsDNA viruses, no RNA stage|Caudovirales|Siphoviridae|Unclassified|Lambdavirus|Escherichia virus Lambda
V-250		Viruses|dsDNA viruses, no RNA stage|Caudovirales|Siphoviridae|Unclassified|Mudcatvirus|Arthrobacter phage Mudcat
V-251		Viruses|dsDNA viruses, no RNA stage|Caudovirales|Siphoviridae|Unclassified|N15virus|Escherichia virus N15
V-252		Viruses|dsDNA viruses, no RNA stage|Caudovirales|Siphoviridae|Unclassified|Nonagvirus|Enterobacteria phage 9g
V-253		Viruses|dsDNA viruses, no RNA stage|Caudovirales|Siphoviridae|Unclassified|Nonagvirus|Enterobacteria phage JenK1
V-254		Viruses|dsDNA viruses, no RNA stage|Caudovirales|Siphoviridae|Unclassified|Nonagvirus|Enterobacteria phage JenP1
V-255		Viruses|dsDNA viruses, no RNA stage|Caudovirales|Siphoviridae|Unclassified|Nonagvirus|Enterobacteria phage JenP2
V-256		Viruses|dsDNA viruses, no RNA stage|Caudovirales|Siphoviridae|Unclassified|Pa6virus|Propionibacterium phage P105
V-257		Viruses|dsDNA viruses, no RNA stage|Caudovirales|Siphoviridae|Unclassified|Pepy6virus|Rhodococcus phage ReqiPepy6
V-258		Viruses|dsDNA viruses, no RNA stage|Caudovirales|Siphoviridae|Unclassified|Pepy6virus|Rhodococcus phage ReqiPoco6
V-259		Viruses|dsDNA viruses, no RNA stage|Caudovirales|Siphoviridae|Unclassified|Phicbkvirus|Caulobacter virus Rogue
V-260		Viruses|dsDNA viruses, no RNA stage|Caudovirales|Siphoviridae|Unclassified|Phietavirus|Staphylococcus virus CNPH82
V-261		Viruses|dsDNA viruses, no RNA stage|Caudovirales|Siphoviridae|Unclassified|Phietavirus|Staphylococcus virus EW
V-262		Viruses|dsDNA viruses, no RNA stage|Caudovirales|Siphoviridae|Unclassified|Phietavirus|Staphylococcus virus IPLA7
V-263		Viruses|dsDNA viruses, no RNA stage|Caudovirales|Siphoviridae|Unclassified|Phietavirus|Staphylococcus virus phiMR25
V-264		Viruses|dsDNA viruses, no RNA stage|Caudovirales|Siphoviridae|Unclassified|Phifelvirus|Enterococcus phage phiFL1A
V-265		Viruses|dsDNA viruses, no RNA stage|Caudovirales|Siphoviridae|Unclassified|Phifelvirus|Enterococcus phage phiFL2A
V-266		Viruses|dsDNA viruses, no RNA stage|Caudovirales|Siphoviridae|Unclassified|Phifelvirus|Enterococcus phage phiFL3A
V-267		Viruses|dsDNA viruses, no RNA stage|Caudovirales|Siphoviridae|Unclassified|Phijl1virus|Lactobacillus virus ATCC8014
V-268		Viruses|dsDNA viruses, no RNA stage|Caudovirales|Siphoviridae|Unclassified|Phijl1virus|Lactobacillus virus phiJL1
V-269		Viruses|dsDNA viruses, no RNA stage|Caudovirales|Siphoviridae|Unclassified|Sap6virus|Enterococcus phage BC611
V-270		Viruses|dsDNA viruses, no RNA stage|Caudovirales|Siphoviridae|Unclassified|Sap6virus|Enterococcus phage VD13
V-271		Viruses|dsDNA viruses, no RNA stage|Caudovirales|Siphoviridae|Unclassified|Sap6virus|Streptococcus phage SPQS1
V-272		Viruses|dsDNA viruses, no RNA stage|Caudovirales|Siphoviridae|Unclassified|Sfi11virus|Streptococcus virus 2972
V-273		Viruses|dsDNA viruses, no RNA stage|Caudovirales|Siphoviridae|Unclassified|Sfi11virus|Streptococcus virus 858
V-274		Viruses|dsDNA viruses, no RNA stage|Caudovirales|Siphoviridae|Unclassified|Sfi11virus|Streptococcus virus ALQ132
V-275		Viruses|dsDNA viruses, no RNA stage|Caudovirales|Siphoviridae|Unclassified|Sfi11virus|Streptococcus virus O1205
V-276		Viruses|dsDNA viruses, no RNA stage|Caudovirales|Siphoviridae|Unclassified|Sfi21dt1virus|Streptococcus virus 7201
V-277		Viruses|dsDNA viruses, no RNA stage|Caudovirales|Siphoviridae|Unclassified|Sfi21dt1virus|Streptococcus virus DT1
V-278		Viruses|dsDNA viruses, no RNA stage|Caudovirales|Siphoviridae|Unclassified|Sfi21dt1virus|Streptococcus virus phiAbc2
V-279		Viruses|dsDNA viruses, no RNA stage|Caudovirales|Siphoviridae|Unclassified|Sfi21dt1virus|Streptococcus virus Sfi19
V-280		Viruses|dsDNA viruses, no RNA stage|Caudovirales|Siphoviridae|Unclassified|Sfi21dt1virus|Streptococcus virus Sfi21
V-281		Viruses|dsDNA viruses, no RNA stage|Caudovirales|Siphoviridae|Unclassified|Sk1virus|Lactococcus virus 712
V-282		Viruses|dsDNA viruses, no RNA stage|Caudovirales|Siphoviridae|Unclassified|Sk1virus|Lactococcus virus ASCC191
V-283		Viruses|dsDNA viruses, no RNA stage|Caudovirales|Siphoviridae|Unclassified|Sk1virus|Lactococcus virus Bibb29
V-284		Viruses|dsDNA viruses, no RNA stage|Caudovirales|Siphoviridae|Unclassified|Sk1virus|Lactococcus virus bIL170
V-285		Viruses|dsDNA viruses, no RNA stage|Caudovirales|Siphoviridae|Unclassified|Sk1virus|Lactococcus virus CB13
V-286		Viruses|dsDNA viruses, no RNA stage|Caudovirales|Siphoviridae|Unclassified|Sk1virus|Lactococcus virus CB14
V-287		Viruses|dsDNA viruses, no RNA stage|Caudovirales|Siphoviridae|Unclassified|Sk1virus|Lactococcus virus jj50
V-288		Viruses|dsDNA viruses, no RNA stage|Caudovirales|Siphoviridae|Unclassified|Sk1virus|Lactococcus virus P008
V-289		Viruses|dsDNA viruses, no RNA stage|Caudovirales|Siphoviridae|Unclassified|Sk1virus|Lactococcus virus sk1
V-290		Viruses|dsDNA viruses, no RNA stage|Caudovirales|Siphoviridae|Unclassified|Sk1virus|Lactococcus virus Sl4
V-291		Viruses|dsDNA viruses, no RNA stage|Caudovirales|Siphoviridae|Unclassified|Smoothievirus|Gordonia phage ClubL
V-292		Viruses|dsDNA viruses, no RNA stage|Caudovirales|Siphoviridae|Unclassified|T5virus|Escherichia phage slur09
V-293		Viruses|dsDNA viruses, no RNA stage|Caudovirales|Siphoviridae|Unclassified|T5virus|Escherichia virus T5
V-294		Viruses|dsDNA viruses, no RNA stage|Caudovirales|Siphoviridae|Unclassified|T5virus|Salmonella virus SPC35
V-295		Viruses|dsDNA viruses, no RNA stage|Caudovirales|Siphoviridae|Unclassified|Triavirus|Staphylococcus virus 42e
V-296		Viruses|dsDNA viruses, no RNA stage|Caudovirales|Siphoviridae|Unclassified|unclassified Spbetalikevirus|Staphylococcus phage SPbeta-like
V-297		Viruses|dsDNA viruses, no RNA stage|Caudovirales|Siphoviridae|Unclassified|unclassified T5likevirus|Vibrio phage pVp-1
V-298		Viruses|dsDNA viruses, no RNA stage|Caudovirales|Siphoviridae|Unclassified|Unclassified|Bacillus phage BCJA1c
V-299		Viruses|dsDNA viruses, no RNA stage|Caudovirales|Siphoviridae|Unclassified|Unclassified|Bacillus phage phIS3501
V-300		Viruses|dsDNA viruses, no RNA stage|Caudovirales|Siphoviridae|Unclassified|Unclassified|Bacillus phage vB_BanS-Tsamsa
V-301		Viruses|dsDNA viruses, no RNA stage|Caudovirales|Siphoviridae|Unclassified|Unclassified|Bacteroides phage B124-14
V-302		Viruses|dsDNA viruses, no RNA stage|Caudovirales|Siphoviridae|Unclassified|Unclassified|Bacteroides phage B40-8
V-303		Viruses|dsDNA viruses, no RNA stage|Caudovirales|Siphoviridae|Unclassified|Unclassified|Brochothrix phage NF5
V-304		Viruses|dsDNA viruses, no RNA stage|Caudovirales|Siphoviridae|Unclassified|Unclassified|Caulobacter phage CcrColossus
V-305		Viruses|dsDNA viruses, no RNA stage|Caudovirales|Siphoviridae|Unclassified|Unclassified|Clostridium phage phiCD111
V-306		Viruses|dsDNA viruses, no RNA stage|Caudovirales|Siphoviridae|Unclassified|Unclassified|Clostridium phage phiCD146
V-307		Viruses|dsDNA viruses, no RNA stage|Caudovirales|Siphoviridae|Unclassified|Unclassified|Clostridium phage phiCD38-2
V-308		Viruses|dsDNA viruses, no RNA stage|Caudovirales|Siphoviridae|Unclassified|Unclassified|Clostridium phage phiCD6356
V-309		Viruses|dsDNA viruses, no RNA stage|Caudovirales|Siphoviridae|Unclassified|Unclassified|Clostridium phage phiCP26F
V-310		Viruses|dsDNA viruses, no RNA stage|Caudovirales|Siphoviridae|Unclassified|Unclassified|Clostridium phage phiCP39-O
V-311		Viruses|dsDNA viruses, no RNA stage|Caudovirales|Siphoviridae|Unclassified|Unclassified|Clostridium phage PhiS63
V-312		Viruses|dsDNA viruses, no RNA stage|Caudovirales|Siphoviridae|Unclassified|Unclassified|Clostridium phage phiSM101
V-313		Viruses|dsDNA viruses, no RNA stage|Caudovirales|Siphoviridae|Unclassified|Unclassified|Clostridium phage vB_CpeS-CP51
V-314		Viruses|dsDNA viruses, no RNA stage|Caudovirales|Siphoviridae|Unclassified|Unclassified|Colwellia phage 9A
V-315		Viruses|dsDNA viruses, no RNA stage|Caudovirales|Siphoviridae|Unclassified|Unclassified|Cronobacter phage ENT39118
V-316		Viruses|dsDNA viruses, no RNA stage|Caudovirales|Siphoviridae|Unclassified|Unclassified|Cronobacter phage phiES15
V-317		Viruses|dsDNA viruses, no RNA stage|Caudovirales|Siphoviridae|Unclassified|Unclassified|Enterobacteria phage BP-4795
V-318		Viruses|dsDNA viruses, no RNA stage|Caudovirales|Siphoviridae|Unclassified|Unclassified|Enterobacteria phage cdtI
V-319		Viruses|dsDNA viruses, no RNA stage|Caudovirales|Siphoviridae|Unclassified|Unclassified|Enterobacteria phage ES18
V-320		Viruses|dsDNA viruses, no RNA stage|Caudovirales|Siphoviridae|Unclassified|Unclassified|Enterobacteria phage HK106
V-321		Viruses|dsDNA viruses, no RNA stage|Caudovirales|Siphoviridae|Unclassified|Unclassified|Enterobacteria phage HK140
V-322		Viruses|dsDNA viruses, no RNA stage|Caudovirales|Siphoviridae|Unclassified|Unclassified|Enterobacteria phage HK225
V-323		Viruses|dsDNA viruses, no RNA stage|Caudovirales|Siphoviridae|Unclassified|Unclassified|Enterobacteria phage HK446
V-324		Viruses|dsDNA viruses, no RNA stage|Caudovirales|Siphoviridae|Unclassified|Unclassified|Enterobacteria phage HK542
V-325		Viruses|dsDNA viruses, no RNA stage|Caudovirales|Siphoviridae|Unclassified|Unclassified|Enterobacteria phage HK544
V-326		Viruses|dsDNA viruses, no RNA stage|Caudovirales|Siphoviridae|Unclassified|Unclassified|Enterobacteria phage HK629
V-327		Viruses|dsDNA viruses, no RNA stage|Caudovirales|Siphoviridae|Unclassified|Unclassified|Enterobacteria phage HK630
V-328		Viruses|dsDNA viruses, no RNA stage|Caudovirales|Siphoviridae|Unclassified|Unclassified|Enterobacteria phage HK633
V-329		Viruses|dsDNA viruses, no RNA stage|Caudovirales|Siphoviridae|Unclassified|Unclassified|Enterobacteria phage mEp043 c-1
V-330		Viruses|dsDNA viruses, no RNA stage|Caudovirales|Siphoviridae|Unclassified|Unclassified|Enterobacteria phage mEp235
V-331		Viruses|dsDNA viruses, no RNA stage|Caudovirales|Siphoviridae|Unclassified|Unclassified|Enterobacteria phage mEp237
V-332		Viruses|dsDNA viruses, no RNA stage|Caudovirales|Siphoviridae|Unclassified|Unclassified|Enterobacteria phage mEp460
V-333		Viruses|dsDNA viruses, no RNA stage|Caudovirales|Siphoviridae|Unclassified|Unclassified|Enterobacteria phage mEpX1
V-334		Viruses|dsDNA viruses, no RNA stage|Caudovirales|Siphoviridae|Unclassified|Unclassified|Enterobacteria phage mEpX2
V-335		Viruses|dsDNA viruses, no RNA stage|Caudovirales|Siphoviridae|Unclassified|Unclassified|Enterobacteria phage phi80
V-336		Viruses|dsDNA viruses, no RNA stage|Caudovirales|Siphoviridae|Unclassified|Unclassified|Enterobacteria phage vB_EcoS_NBD2
V-337		Viruses|dsDNA viruses, no RNA stage|Caudovirales|Siphoviridae|Unclassified|Unclassified|Enterobacterial phage mEp213
V-338		Viruses|dsDNA viruses, no RNA stage|Caudovirales|Siphoviridae|Unclassified|Unclassified|Enterobacterial phage mEp234
V-339		Viruses|dsDNA viruses, no RNA stage|Caudovirales|Siphoviridae|Unclassified|Unclassified|Enterobacterial phage mEp390
V-340		Viruses|dsDNA viruses, no RNA stage|Caudovirales|Siphoviridae|Unclassified|Unclassified|Enterococcus phage EFAP-1
V-341		Viruses|dsDNA viruses, no RNA stage|Caudovirales|Siphoviridae|Unclassified|Unclassified|Enterococcus phage EFC-1
V-342		Viruses|dsDNA viruses, no RNA stage|Caudovirales|Siphoviridae|Unclassified|Unclassified|Enterococcus phage IME-EFm1
V-343		Viruses|dsDNA viruses, no RNA stage|Caudovirales|Siphoviridae|Unclassified|Unclassified|Enterococcus phage IME-EFm5
V-344		Viruses|dsDNA viruses, no RNA stage|Caudovirales|Siphoviridae|Unclassified|Unclassified|Enterococcus phage phiEf11
V-345		Viruses|dsDNA viruses, no RNA stage|Caudovirales|Siphoviridae|Unclassified|Unclassified|Enterococcus phage phiFL4A
V-346		Viruses|dsDNA viruses, no RNA stage|Caudovirales|Siphoviridae|Unclassified|Unclassified|Enterococcus phage SANTOR1
V-347		Viruses|dsDNA viruses, no RNA stage|Caudovirales|Siphoviridae|Unclassified|Unclassified|Enterococcus phage vB_EfaS_IME196
V-348		Viruses|dsDNA viruses, no RNA stage|Caudovirales|Siphoviridae|Unclassified|Unclassified|Enterococcus phage vB_EfaS_IME197
V-349		Viruses|dsDNA viruses, no RNA stage|Caudovirales|Siphoviridae|Unclassified|Unclassified|Enterococcus phage vB_EfaS_IME198
V-350		Viruses|dsDNA viruses, no RNA stage|Caudovirales|Siphoviridae|Unclassified|Unclassified|Erwinia phage phiEaH2
V-351		Viruses|dsDNA viruses, no RNA stage|Caudovirales|Siphoviridae|Unclassified|Unclassified|Escherichia phage HK639
V-352		Viruses|dsDNA viruses, no RNA stage|Caudovirales|Siphoviridae|Unclassified|Unclassified|Escherichia phage HK75
V-353		Viruses|dsDNA viruses, no RNA stage|Caudovirales|Siphoviridae|Unclassified|Unclassified|Gordonia phage Nyceirae
V-354		Viruses|dsDNA viruses, no RNA stage|Caudovirales|Siphoviridae|Unclassified|Unclassified|Klebsiella phage phiKO2
V-355		Viruses|dsDNA viruses, no RNA stage|Caudovirales|Siphoviridae|Unclassified|Unclassified|Lactobacillus phage A2
V-356		Viruses|dsDNA viruses, no RNA stage|Caudovirales|Siphoviridae|Unclassified|Unclassified|Lactobacillus phage CL1
V-357		Viruses|dsDNA viruses, no RNA stage|Caudovirales|Siphoviridae|Unclassified|Unclassified|Lactobacillus phage CL2
V-358		Viruses|dsDNA viruses, no RNA stage|Caudovirales|Siphoviridae|Unclassified|Unclassified|Lactobacillus phage iA2
V-359		Viruses|dsDNA viruses, no RNA stage|Caudovirales|Siphoviridae|Unclassified|Unclassified|Lactobacillus phage iLp1308
V-360		Viruses|dsDNA viruses, no RNA stage|Caudovirales|Siphoviridae|Unclassified|Unclassified|Lactobacillus phage iLp84
V-361		Viruses|dsDNA viruses, no RNA stage|Caudovirales|Siphoviridae|Unclassified|Unclassified|Lactobacillus phage J-1
V-362		Viruses|dsDNA viruses, no RNA stage|Caudovirales|Siphoviridae|Unclassified|Unclassified|Lactobacillus phage JCL1032
V-363		Viruses|dsDNA viruses, no RNA stage|Caudovirales|Siphoviridae|Unclassified|Unclassified|Lactobacillus phage Lc-Nu
V-364		Viruses|dsDNA viruses, no RNA stage|Caudovirales|Siphoviridae|Unclassified|Unclassified|Lactobacillus phage Ldl1
V-365		Viruses|dsDNA viruses, no RNA stage|Caudovirales|Siphoviridae|Unclassified|Unclassified|Lactobacillus phage LF1
V-366		Viruses|dsDNA viruses, no RNA stage|Caudovirales|Siphoviridae|Unclassified|Unclassified|Lactobacillus phage LfeSau
V-367		Viruses|dsDNA viruses, no RNA stage|Caudovirales|Siphoviridae|Unclassified|Unclassified|Lactobacillus phage Lrm1
V-368		Viruses|dsDNA viruses, no RNA stage|Caudovirales|Siphoviridae|Unclassified|Unclassified|Lactobacillus phage Lv-1
V-369		Viruses|dsDNA viruses, no RNA stage|Caudovirales|Siphoviridae|Unclassified|Unclassified|Lactobacillus phage phiadh
V-370		Viruses|dsDNA viruses, no RNA stage|Caudovirales|Siphoviridae|Unclassified|Unclassified|Lactobacillus phage phiAT3
V-371		Viruses|dsDNA viruses, no RNA stage|Caudovirales|Siphoviridae|Unclassified|Unclassified|Lactobacillus phage phig1e
V-372		Viruses|dsDNA viruses, no RNA stage|Caudovirales|Siphoviridae|Unclassified|Unclassified|Lactobacillus phage phiJB
V-373		Viruses|dsDNA viruses, no RNA stage|Caudovirales|Siphoviridae|Unclassified|Unclassified|Lactobacillus phage phiPYB5
V-374		Viruses|dsDNA viruses, no RNA stage|Caudovirales|Siphoviridae|Unclassified|Unclassified|Lactobacillus phage PL-1
V-375		Viruses|dsDNA viruses, no RNA stage|Caudovirales|Siphoviridae|Unclassified|Unclassified|Lactobacillus phage PLE2
V-376		Viruses|dsDNA viruses, no RNA stage|Caudovirales|Siphoviridae|Unclassified|Unclassified|Lactobacillus phage PLE3
V-377		Viruses|dsDNA viruses, no RNA stage|Caudovirales|Siphoviridae|Unclassified|Unclassified|Lactobacillus phage Sha1
V-378		Viruses|dsDNA viruses, no RNA stage|Caudovirales|Siphoviridae|Unclassified|Unclassified|Lactobacillus prophage Lj928
V-379		Viruses|dsDNA viruses, no RNA stage|Caudovirales|Siphoviridae|Unclassified|Unclassified|Lactobacillus prophage Lj965
V-380		Viruses|dsDNA viruses, no RNA stage|Caudovirales|Siphoviridae|Unclassified|Unclassified|Lactococcus phage 28201
V-381		Viruses|dsDNA viruses, no RNA stage|Caudovirales|Siphoviridae|Unclassified|Unclassified|Lactococcus phage 340
V-382		Viruses|dsDNA viruses, no RNA stage|Caudovirales|Siphoviridae|Unclassified|Unclassified|Lactococcus phage 50101
V-383		Viruses|dsDNA viruses, no RNA stage|Caudovirales|Siphoviridae|Unclassified|Unclassified|Lactococcus phage 63301
V-384		Viruses|dsDNA viruses, no RNA stage|Caudovirales|Siphoviridae|Unclassified|Unclassified|Lactococcus phage 949
V-385		Viruses|dsDNA viruses, no RNA stage|Caudovirales|Siphoviridae|Unclassified|Unclassified|Lactococcus phage 98201
V-386		Viruses|dsDNA viruses, no RNA stage|Caudovirales|Siphoviridae|Unclassified|Unclassified|Lactococcus phage bIL285
V-387		Viruses|dsDNA viruses, no RNA stage|Caudovirales|Siphoviridae|Unclassified|Unclassified|Lactococcus phage bIL286
V-388		Viruses|dsDNA viruses, no RNA stage|Caudovirales|Siphoviridae|Unclassified|Unclassified|Lactococcus phage bIL309
V-389		Viruses|dsDNA viruses, no RNA stage|Caudovirales|Siphoviridae|Unclassified|Unclassified|Lactococcus phage bIL310
V-390		Viruses|dsDNA viruses, no RNA stage|Caudovirales|Siphoviridae|Unclassified|Unclassified|Lactococcus phage bIL311
V-391		Viruses|dsDNA viruses, no RNA stage|Caudovirales|Siphoviridae|Unclassified|Unclassified|Lactococcus phage bIL312
V-392		Viruses|dsDNA viruses, no RNA stage|Caudovirales|Siphoviridae|Unclassified|Unclassified|Lactococcus phage BK5-T
V-393		Viruses|dsDNA viruses, no RNA stage|Caudovirales|Siphoviridae|Unclassified|Unclassified|Lactococcus phage BM13
V-394		Viruses|dsDNA viruses, no RNA stage|Caudovirales|Siphoviridae|Unclassified|Unclassified|Lactococcus phage jm2
V-395		Viruses|dsDNA viruses, no RNA stage|Caudovirales|Siphoviridae|Unclassified|Unclassified|Lactococcus phage jm3
V-396		Viruses|dsDNA viruses, no RNA stage|Caudovirales|Siphoviridae|Unclassified|Unclassified|Lactococcus phage P087
V-397		Viruses|dsDNA viruses, no RNA stage|Caudovirales|Siphoviridae|Unclassified|Unclassified|Lactococcus phage P335 sensu lato
V-398		Viruses|dsDNA viruses, no RNA stage|Caudovirales|Siphoviridae|Unclassified|Unclassified|Lactococcus phage P680
V-399		Viruses|dsDNA viruses, no RNA stage|Caudovirales|Siphoviridae|Unclassified|Unclassified|Lactococcus phage phi7
V-400		Viruses|dsDNA viruses, no RNA stage|Caudovirales|Siphoviridae|Unclassified|Unclassified|Lactococcus phage phiL47
V-401		Viruses|dsDNA viruses, no RNA stage|Caudovirales|Siphoviridae|Unclassified|Unclassified|Lactococcus phage phiLC3
V-402		Viruses|dsDNA viruses, no RNA stage|Caudovirales|Siphoviridae|Unclassified|Unclassified|Lactococcus phage PLgT-1
V-403		Viruses|dsDNA viruses, no RNA stage|Caudovirales|Siphoviridae|Unclassified|Unclassified|Lactococcus phage r1t
V-404		Viruses|dsDNA viruses, no RNA stage|Caudovirales|Siphoviridae|Unclassified|Unclassified|Lactococcus phage TP901-1
V-405		Viruses|dsDNA viruses, no RNA stage|Caudovirales|Siphoviridae|Unclassified|Unclassified|Lactococcus phage Tuc2009
V-406		Viruses|dsDNA viruses, no RNA stage|Caudovirales|Siphoviridae|Unclassified|Unclassified|Lactococcus phage ul36
V-407		Viruses|dsDNA viruses, no RNA stage|Caudovirales|Siphoviridae|Unclassified|Unclassified|Lactococcus phage WRP3
V-408		Viruses|dsDNA viruses, no RNA stage|Caudovirales|Siphoviridae|Unclassified|Unclassified|Leuconostoc phage 1-A4
V-409		Viruses|dsDNA viruses, no RNA stage|Caudovirales|Siphoviridae|Unclassified|Unclassified|Leuconostoc phage phiLN34
V-410		Viruses|dsDNA viruses, no RNA stage|Caudovirales|Siphoviridae|Unclassified|Unclassified|Leuconostoc phage phiLNTR2
V-411		Viruses|dsDNA viruses, no RNA stage|Caudovirales|Siphoviridae|Unclassified|Unclassified|Leuconostoc phage phiLNTR3
V-412		Viruses|dsDNA viruses, no RNA stage|Caudovirales|Siphoviridae|Unclassified|Unclassified|Listeria phage vB_LmoS_188
V-413		Viruses|dsDNA viruses, no RNA stage|Caudovirales|Siphoviridae|Unclassified|Unclassified|Mannheimia phage vB_MhS_587AP2
V-414		Viruses|dsDNA viruses, no RNA stage|Caudovirales|Siphoviridae|Unclassified|Unclassified|Microbacterium phage Min1
V-415		Viruses|dsDNA viruses, no RNA stage|Caudovirales|Siphoviridae|Unclassified|Unclassified|Mycobacterium phage Brocalys
V-416		Viruses|dsDNA viruses, no RNA stage|Caudovirales|Siphoviridae|Unclassified|Unclassified|Mycobacterium phage BTCU-1
V-417		Viruses|dsDNA viruses, no RNA stage|Caudovirales|Siphoviridae|Unclassified|Unclassified|Mycobacterium phage BuzzLyseyear
V-418		Viruses|dsDNA viruses, no RNA stage|Caudovirales|Siphoviridae|Unclassified|Unclassified|Mycobacterium phage Crossroads
V-419		Viruses|dsDNA viruses, no RNA stage|Caudovirales|Siphoviridae|Unclassified|Unclassified|Mycobacterium phage Lolly9
V-420		Viruses|dsDNA viruses, no RNA stage|Caudovirales|Siphoviridae|Unclassified|Unclassified|Mycobacterium phage PegLeg
V-421		Viruses|dsDNA viruses, no RNA stage|Caudovirales|Siphoviridae|Unclassified|Unclassified|Mycobacterium phage SiSi
V-422		Viruses|dsDNA viruses, no RNA stage|Caudovirales|Siphoviridae|Unclassified|Unclassified|Mycobacterium phage Snenia
V-423		Viruses|dsDNA viruses, no RNA stage|Caudovirales|Siphoviridae|Unclassified|Unclassified|Mycobacterium phage Whirlwind
V-424		Viruses|dsDNA viruses, no RNA stage|Caudovirales|Siphoviridae|Unclassified|Unclassified|Mycobacterium phage XFactor
V-425		Viruses|dsDNA viruses, no RNA stage|Caudovirales|Siphoviridae|Unclassified|Unclassified|Paenibacillus phage Xenia
V-426		Viruses|dsDNA viruses, no RNA stage|Caudovirales|Siphoviridae|Unclassified|Unclassified|Pectobacterium phage My1
V-427		Viruses|dsDNA viruses, no RNA stage|Caudovirales|Siphoviridae|Unclassified|Unclassified|Pseudomonas phage JBD44
V-428		Viruses|dsDNA viruses, no RNA stage|Caudovirales|Siphoviridae|Unclassified|Unclassified|Pseudomonas phage PaMx42
V-429		Viruses|dsDNA viruses, no RNA stage|Caudovirales|Siphoviridae|Unclassified|Unclassified|Pseudomonas phage phi297
V-430		Viruses|dsDNA viruses, no RNA stage|Caudovirales|Siphoviridae|Unclassified|Unclassified|Pseudomonas phage PS-1
V-431		Viruses|dsDNA viruses, no RNA stage|Caudovirales|Siphoviridae|Unclassified|Unclassified|Pseudomonas phage YMC11/07/P54_PAE_BP
V-432		Viruses|dsDNA viruses, no RNA stage|Caudovirales|Siphoviridae|Unclassified|Unclassified|Salmonella phage 36
V-433		Viruses|dsDNA viruses, no RNA stage|Caudovirales|Siphoviridae|Unclassified|Unclassified|Salmonella phage BPS11Q3
V-434		Viruses|dsDNA viruses, no RNA stage|Caudovirales|Siphoviridae|Unclassified|Unclassified|Salmonella phage IME207
V-435		Viruses|dsDNA viruses, no RNA stage|Caudovirales|Siphoviridae|Unclassified|Unclassified|Salmonella phage MA12
V-436		Viruses|dsDNA viruses, no RNA stage|Caudovirales|Siphoviridae|Unclassified|Unclassified|Salmonella phage phSE-2
V-437		Viruses|dsDNA viruses, no RNA stage|Caudovirales|Siphoviridae|Unclassified|Unclassified|Salmonella phage SETP7
V-438		Viruses|dsDNA viruses, no RNA stage|Caudovirales|Siphoviridae|Unclassified|Unclassified|Salmonella phage SPN3UB
V-439		Viruses|dsDNA viruses, no RNA stage|Caudovirales|Siphoviridae|Unclassified|Unclassified|Salmonella phage SSU5
V-440		Viruses|dsDNA viruses, no RNA stage|Caudovirales|Siphoviridae|Unclassified|Unclassified|Salmonella phage vB_SenS-Ent2
V-441		Viruses|dsDNA viruses, no RNA stage|Caudovirales|Siphoviridae|Unclassified|Unclassified|Salmonella phage vB_SenS-Ent3
V-442		Viruses|dsDNA viruses, no RNA stage|Caudovirales|Siphoviridae|Unclassified|Unclassified|Salmonella phage vB_SosS_Oslo
V-443		Viruses|dsDNA viruses, no RNA stage|Caudovirales|Siphoviridae|Unclassified|Unclassified|Salmonella phage Vi II-E1
V-444		Viruses|dsDNA viruses, no RNA stage|Caudovirales|Siphoviridae|Unclassified|Unclassified|Shigella phage pSf-1
V-445		Viruses|dsDNA viruses, no RNA stage|Caudovirales|Siphoviridae|Unclassified|Unclassified|Sinorhizobium phage phiLM21
V-446		Viruses|dsDNA viruses, no RNA stage|Caudovirales|Siphoviridae|Unclassified|Unclassified|Staphylococcus phage StB20
V-447		Viruses|dsDNA viruses, no RNA stage|Caudovirales|Siphoviridae|Unclassified|Unclassified|Staphylococcus phage StB20-like
V-448		Viruses|dsDNA viruses, no RNA stage|Caudovirales|Siphoviridae|Unclassified|Unclassified|Streptococcus phage 5093
V-449		Viruses|dsDNA viruses, no RNA stage|Caudovirales|Siphoviridae|Unclassified|Unclassified|Streptococcus phage Dp-1
V-450		Viruses|dsDNA viruses, no RNA stage|Caudovirales|Siphoviridae|Unclassified|Unclassified|Streptococcus phage MM1
V-451		Viruses|dsDNA viruses, no RNA stage|Caudovirales|Siphoviridae|Unclassified|Unclassified|Streptococcus phage PH10
V-452		Viruses|dsDNA viruses, no RNA stage|Caudovirales|Siphoviridae|Unclassified|Unclassified|Streptococcus phage PH15
V-453		Viruses|dsDNA viruses, no RNA stage|Caudovirales|Siphoviridae|Unclassified|Unclassified|Streptococcus phage phiARI0468-4
V-454		Viruses|dsDNA viruses, no RNA stage|Caudovirales|Siphoviridae|Unclassified|Unclassified|Streptococcus phage phiARI0746
V-455		Viruses|dsDNA viruses, no RNA stage|Caudovirales|Siphoviridae|Unclassified|Unclassified|Streptococcus phage phiARI0923
V-456		Viruses|dsDNA viruses, no RNA stage|Caudovirales|Siphoviridae|Unclassified|Unclassified|Streptococcus phage SM1
V-457		Viruses|dsDNA viruses, no RNA stage|Caudovirales|Siphoviridae|Unclassified|Unclassified|Streptococcus phage SMP
V-458		Viruses|dsDNA viruses, no RNA stage|Caudovirales|Siphoviridae|Unclassified|Unclassified|Streptococcus phage SpSL1
V-459		Viruses|dsDNA viruses, no RNA stage|Caudovirales|Siphoviridae|Unclassified|Unclassified|Streptococcus phage TP-778L
V-460		Viruses|dsDNA viruses, no RNA stage|Caudovirales|Siphoviridae|Unclassified|Unclassified|Streptococcus phage TP-J34
V-461		Viruses|dsDNA viruses, no RNA stage|Caudovirales|Siphoviridae|Unclassified|Unclassified|Streptococcus phage YMC-2011
V-462		Viruses|dsDNA viruses, no RNA stage|Caudovirales|Siphoviridae|Unclassified|Unclassified|Streptococcus virus 9871
V-463		Viruses|dsDNA viruses, no RNA stage|Caudovirales|Siphoviridae|Unclassified|Unclassified|Streptococcus virus 9872
V-464		Viruses|dsDNA viruses, no RNA stage|Caudovirales|Siphoviridae|Unclassified|Unclassified|Streptococcus virus 9874
V-465		Viruses|dsDNA viruses, no RNA stage|Caudovirales|Siphoviridae|Unclassified|Unclassified|Streptomyces phage Zemlya
V-466		Viruses|dsDNA viruses, no RNA stage|Caudovirales|Siphoviridae|Unclassified|Unclassified|Stx2-converting phage 1717
V-467		Viruses|dsDNA viruses, no RNA stage|Caudovirales|Siphoviridae|Unclassified|Unclassified|Synechococcus phage S-SKS1
V-468		Viruses|dsDNA viruses, no RNA stage|Caudovirales|Siphoviridae|Unclassified|Unclassified|Temperate phage phiNIH1.1
V-469		Viruses|dsDNA viruses, no RNA stage|Caudovirales|Siphoviridae|Unclassified|Vegasvirus|Paenibacillus phage Vegas
V-470		Viruses|dsDNA viruses, no RNA stage|Caudovirales|Siphoviridae|Unclassified|Vendettavirus|Gordonia phage Vendetta
V-471		Viruses|dsDNA viruses, no RNA stage|Caudovirales|Unclassified|Unclassified|Unclassified|Prochlorococcus phage Syn1
V-472		Viruses|dsDNA viruses, no RNA stage|Caudovirales|Unclassified|Unclassified|Unclassified|Salmonella phage ST64B
V-473		Viruses|dsDNA viruses, no RNA stage|Herpesvirales|Alloherpesviridae|Unclassified|Ictalurivirus|Ictalurid herpesvirus 1
V-474		Viruses|dsDNA viruses, no RNA stage|Herpesvirales|Herpesviridae|Betaherpesvirinae|Cytomegalovirus|Cercopithecine betaherpesvirus 5
V-475		Viruses|dsDNA viruses, no RNA stage|Herpesvirales|Herpesviridae|Gammaherpesvirinae|Macavirus|Ovine gammaherpesvirus 2
V-476		Viruses|dsDNA viruses, no RNA stage|Herpesvirales|Herpesviridae|Gammaherpesvirinae|Unclassified|Felis catus gammaherpesvirus 1
V-477		Viruses|dsDNA viruses, no RNA stage|unclassified dsDNA viruses|Unclassified|Unclassified|Unclassified|Apis mellifera filamentous virus
V-478		Viruses|dsDNA viruses, no RNA stage|unclassified dsDNA viruses|Unclassified|Unclassified|Unclassified|Micromonas pusilla virus 12T
V-479		Viruses|dsDNA viruses, no RNA stage|unclassified dsDNA viruses|Unclassified|Unclassified|Unclassified|Pandoravirus dulcis
V-480		Viruses|dsDNA viruses, no RNA stage|unclassified dsDNA viruses|Unclassified|Unclassified|Unclassified|Pandoravirus salinus
V-481		Viruses|dsDNA viruses, no RNA stage|Unclassified|Adenoviridae|Unclassified|Bat mastadenovirus B|Bat adenovirus 2
V-482		Viruses|dsDNA viruses, no RNA stage|Unclassified|Adenoviridae|Unclassified|Bovine mastadenovirus B|Bovine adenovirus 3
V-483		Viruses|dsDNA viruses, no RNA stage|Unclassified|Adenoviridae|Unclassified|Human mastadenovirus B|Human adenovirus 35
V-484		Viruses|dsDNA viruses, no RNA stage|Unclassified|Adenoviridae|Unclassified|Mastadenovirus|Bat mastadenovirus WIV9
V-485		Viruses|dsDNA viruses, no RNA stage|Unclassified|Adenoviridae|Unclassified|Mastadenovirus|Bovine mastadenovirus B
V-486		Viruses|dsDNA viruses, no RNA stage|Unclassified|Adenoviridae|Unclassified|Mastadenovirus|Human adenovirus 1
V-487		Viruses|dsDNA viruses, no RNA stage|Unclassified|Adenoviridae|Unclassified|Mastadenovirus|Human mastadenovirus A
V-488		Viruses|dsDNA viruses, no RNA stage|Unclassified|Adenoviridae|Unclassified|Mastadenovirus|Human mastadenovirus B
V-489		Viruses|dsDNA viruses, no RNA stage|Unclassified|Adenoviridae|Unclassified|Mastadenovirus|Human mastadenovirus F
V-490		Viruses|dsDNA viruses, no RNA stage|Unclassified|Adenoviridae|Unclassified|Mastadenovirus|Simian adenovirus 1
V-491		Viruses|dsDNA viruses, no RNA stage|Unclassified|Adenoviridae|Unclassified|Mastadenovirus|Simian adenovirus 13
V-492		Viruses|dsDNA viruses, no RNA stage|Unclassified|Adenoviridae|Unclassified|Mastadenovirus|Simian adenovirus 16
V-493		Viruses|dsDNA viruses, no RNA stage|Unclassified|Adenoviridae|Unclassified|Mastadenovirus|Simian adenovirus 19
V-494		Viruses|dsDNA viruses, no RNA stage|Unclassified|Adenoviridae|Unclassified|Mastadenovirus|Simian adenovirus 3
V-495		Viruses|dsDNA viruses, no RNA stage|Unclassified|Adenoviridae|Unclassified|Mastadenovirus|Simian adenovirus 8
V-496		Viruses|dsDNA viruses, no RNA stage|Unclassified|Adenoviridae|Unclassified|Mastadenovirus|Simian adenovirus C
V-497		Viruses|dsDNA viruses, no RNA stage|Unclassified|Adenoviridae|Unclassified|Mastadenovirus|Simian adenovirus DM-2014
V-498		Viruses|dsDNA viruses, no RNA stage|Unclassified|Adenoviridae|Unclassified|Mastadenovirus|Simian mastadenovirus WIV19
V-499		Viruses|dsDNA viruses, no RNA stage|Unclassified|Ampullaviridae|Unclassified|Ampullavirus|Acidianus bottle-shaped virus
V-500		Viruses|dsDNA viruses, no RNA stage|Unclassified|Baculoviridae|Unclassified|Alphabaculovirus|Hyphantria cunea nucleopolyhedrovirus
V-501		Viruses|dsDNA viruses, no RNA stage|Unclassified|Baculoviridae|Unclassified|unclassified Betabaculovirus|Choristoneura occidentalis granulovirus
V-502		Viruses|dsDNA viruses, no RNA stage|Unclassified|Mimiviridae|Unclassified|Cafeteriavirus|Cafeteria roenbergensis virus BV-PW1
V-503		Viruses|dsDNA viruses, no RNA stage|Unclassified|Mimiviridae|Unclassified|Mimivirus|Acanthamoeba polyphaga mimivirus
V-504		Viruses|dsDNA viruses, no RNA stage|Unclassified|Nimaviridae|Unclassified|Whispovirus|White spot syndrome virus
V-505		Viruses|dsDNA viruses, no RNA stage|Unclassified|Nudiviridae|Unclassified|Betanudivirus|Helicoverpa zea nudivirus 2
V-506		Viruses|dsDNA viruses, no RNA stage|Unclassified|Phycodnaviridae|Unclassified|Chlorovirus|Acanthocystis turfacea Chlorella virus 1
V-507		Viruses|dsDNA viruses, no RNA stage|Unclassified|Phycodnaviridae|Unclassified|Chlorovirus|Paramecium bursaria Chlorella virus 1
V-508		Viruses|dsDNA viruses, no RNA stage|Unclassified|Phycodnaviridae|Unclassified|Coccolithovirus|Emiliania huxleyi virus 86
V-509		Viruses|dsDNA viruses, no RNA stage|Unclassified|Phycodnaviridae|Unclassified|Phaeovirus|Ectocarpus siliculosus virus 1
V-510		Viruses|dsDNA viruses, no RNA stage|Unclassified|Phycodnaviridae|Unclassified|unclassified Chlorovirus|Only Syngen Nebraska virus 5
V-511		Viruses|dsDNA viruses, no RNA stage|Unclassified|Phycodnaviridae|Unclassified|unclassified Prasinovirus|Bathycoccus sp. RCC1105 virus BpV1
V-512		Viruses|dsDNA viruses, no RNA stage|Unclassified|Phycodnaviridae|Unclassified|unclassified Prymnesiovirus|Phaeocystis globosa virus virophage
V-513		Viruses|dsDNA viruses, no RNA stage|Unclassified|Polydnaviridae|Unclassified|Bracovirus|Cotesia congregata bracovirus
V-514		Viruses|dsDNA viruses, no RNA stage|Unclassified|Polydnaviridae|Unclassified|Ichnovirus|Glypta fumiferanae ichnovirus
V-515		Viruses|dsDNA viruses, no RNA stage|Unclassified|Polydnaviridae|Unclassified|Ichnovirus|Hyposoter fugitivus ichnovirus
V-516		Viruses|dsDNA viruses, no RNA stage|Unclassified|Poxviridae|Chordopoxvirinae|Orthopoxvirus|Monkeypox virus Zaire-96-I-16
V-517		Viruses|dsDNA viruses, no RNA stage|Unclassified|Poxviridae|Chordopoxvirinae|Orthopoxvirus|Taterapox virus
V-518		Viruses|dsDNA viruses, no RNA stage|Unclassified|Poxviridae|Entomopoxvirinae|Betaentomopoxvirus|Choristoneura biennis entomopoxvirus
V-519		Viruses|dsDNA viruses, no RNA stage|Unclassified|Poxviridae|Entomopoxvirinae|Unclassified|Melanoplus sanguinipes entomopoxvirus
V-520		Viruses|dsDNA viruses, no RNA stage|Unclassified|Poxviridae|unclassified Chordopoxvirinae|Unclassified|BeAn 58058 virus
V-521		Viruses|dsDNA viruses, no RNA stage|Unclassified|Poxviridae|unclassified Chordopoxvirinae|Unclassified|Pteropox virus
V-522		Viruses|dsDNA viruses, no RNA stage|Unclassified|Poxviridae|unclassified Chordopoxvirinae|Unclassified|Squirrelpox virus Berlin_2015
V-523		Viruses|dsDNA viruses, no RNA stage|Unclassified|unclassified Marseilleviridae|Unclassified|Unclassified|Tokyovirus A1
V-524		Viruses|dsDNA viruses, no RNA stage|Unclassified|unclassified Mimiviridae|Unclassified|Unclassified|Acanthamoeba polyphaga moumouvirus
V-525		Viruses|dsDNA viruses, no RNA stage|Unclassified|unclassified Mimiviridae|Unclassified|Unclassified|Megavirus chiliensis
V-526		Viruses|dsDNA viruses, no RNA stage|Unclassified|unclassified Phycodnaviridae|Unclassified|Unclassified|Aureococcus anophagefferens virus
V-527		Viruses|dsDNA viruses, no RNA stage|Unclassified|unclassified Phycodnaviridae|Unclassified|Unclassified|Chrysochromulina ericina virus
V-528		Viruses|dsDNA viruses, no RNA stage|Unclassified|Unclassified|Unclassified|Unclassified|Clostridium phage phiCT453A
V-529		Viruses|dsDNA viruses, no RNA stage|Unclassified|Unclassified|Unclassified|Unclassified|Clostridium phage phiCT9441A
V-530		Viruses|dsDNA viruses, no RNA stage|Unclassified|Unclassified|Unclassified|Unclassified|Cyanophage Syn30
V-531		Viruses|dsDNA viruses, no RNA stage|Unclassified|Unclassified|Unclassified|Unclassified|Oenococcus phage phi9805
V-532		Viruses|dsDNA viruses, no RNA stage|Unclassified|Unclassified|Unclassified|Unclassified|Oenococcus phage phiS11
V-533		Viruses|dsDNA viruses, no RNA stage|Unclassified|Unclassified|Unclassified|Unclassified|Oenococcus phage phiS13
V-534		Viruses|dsDNA viruses, no RNA stage|Unclassified|Unclassified|Unclassified|Unclassified|Pseudomonas phage vB_PaeP_Tr60_Ab31
V-535		Viruses|dsDNA viruses, no RNA stage|Unclassified|Unclassified|Unclassified|Unclassified|Synechococcus phage S-CBP2
V-536		Viruses|dsDNA viruses, no RNA stage|Unclassified|Unclassified|Unclassified|Unclassified|Vibrio phage pYD38-A
V-537		Viruses|Retro-transcribing viruses|Unclassified|Retroviridae|Orthoretrovirinae|Betaretrovirus|Jaagsiekte sheep retrovirus
V-538		Viruses|Retro-transcribing viruses|Unclassified|Retroviridae|Orthoretrovirinae|Gammaretrovirus|Porcine endogenous retrovirus E
V-539		Viruses|ssDNA viruses|Unclassified|Inoviridae|Unclassified|Inovirus|Escherichia virus M13
V-540		Viruses|ssDNA viruses|Unclassified|Inoviridae|Unclassified|Unclassified|Uncultured phage WW-nAnB strain 3
V-541		Viruses|ssDNA viruses|Unclassified|unassigned Inoviridae|Unclassified|Unclassified|Enterobacteria phage If1
V-542		Viruses|ssDNA viruses|Unclassified|unclassified Microviridae|Unclassified|Unclassified|Parabacteroides phage YZ-2015a
V-543		Viruses|ssDNA viruses|Unclassified|unclassified Microviridae|Unclassified|Unclassified|Parabacteroides phage YZ-2015b
V-544		Viruses|ssRNA viruses|Picornavirales|Picornaviridae|Unclassified|Cardiovirus|Encephalomyocarditis virus
V-545		Viruses|ssRNA viruses|Unclassified|Astroviridae|Unclassified|unclassified Mamastrovirus|Qinghai Himalayan marmot astrovirus 1
V-546		Viruses|ssRNA viruses|Unclassified|Bromoviridae|Unclassified|Cucumovirus|Tomato aspermy virus
V-547		Viruses|unclassified bacterial viruses|Unclassified|Unclassified|Unclassified|Unclassified|Enterobacteria phage YYZ-2008
V-548		Viruses|unclassified bacterial viruses|Unclassified|Unclassified|Unclassified|Unclassified|Enterococcus phage EF62phi
V-549		Viruses|unclassified bacterial viruses|Unclassified|Unclassified|Unclassified|Unclassified|Erwinia phage vB_EamM_Caitlin
V-550		Viruses|unclassified bacterial viruses|Unclassified|Unclassified|Unclassified|Unclassified|Flavobacterium phage Fpv2
V-551		Viruses|unclassified bacterial viruses|Unclassified|Unclassified|Unclassified|Unclassified|Flavobacterium phage Fpv20
V-552		Viruses|unclassified bacterial viruses|Unclassified|Unclassified|Unclassified|Unclassified|Lactobacillus prophage Lj771
V-553		Viruses|unclassified bacterial viruses|Unclassified|Unclassified|Unclassified|Unclassified|Propionibacterium phage PFR2
V-554		Viruses|unclassified bacterial viruses|Unclassified|Unclassified|Unclassified|Unclassified|Rhodococcus phage REQ3
V-555		Viruses|unclassified bacterial viruses|Unclassified|Unclassified|Unclassified|Unclassified|Salmonella phage 118970_sal3
V-556		Viruses|unclassified bacterial viruses|Unclassified|Unclassified|Unclassified|Unclassified|Streptococcus phage 20617
V-557		Viruses|unclassified bacterial viruses|Unclassified|Unclassified|Unclassified|Unclassified|Streptococcus phage DCC1738
V-558		Viruses|unclassified bacterial viruses|Unclassified|Unclassified|Unclassified|Unclassified|Streptococcus phage K13
V-559		Viruses|unclassified bacterial viruses|Unclassified|Unclassified|Unclassified|Unclassified|Streptococcus phage phiARI0004
V-560		Viruses|unclassified bacterial viruses|Unclassified|Unclassified|Unclassified|Unclassified|Streptococcus phage phiARI0131-1
V-561		Viruses|unclassified bacterial viruses|Unclassified|Unclassified|Unclassified|Unclassified|Streptococcus phage phiARI0131-2
V-562		Viruses|unclassified bacterial viruses|Unclassified|Unclassified|Unclassified|Unclassified|Streptococcus phage phiARI0462
V-563		Viruses|unclassified bacterial viruses|Unclassified|Unclassified|Unclassified|Unclassified|Streptococcus phage phiARI0468-2
V-564		Viruses|unclassified bacterial viruses|Unclassified|Unclassified|Unclassified|Unclassified|Streptococcus phage phiBHN167
V-565		Viruses|unclassified bacterial viruses|Unclassified|Unclassified|Unclassified|Unclassified|Synechococcus phage S-CAM3
V-566		Viruses|unclassified bacterial viruses|Unclassified|Unclassified|Unclassified|Unclassified|Synechococcus phage S-CAM9
V-567		Viruses|unclassified bacterial viruses|Unclassified|Unclassified|Unclassified|Unclassified|uncultured crAssphage
V-568		Viruses|unclassified viruses|Unclassified|Unclassified|Unclassified|Unclassified|Human smacovirus 1
V-569		Viruses|Virus families not assigned to an order|Unclassified|Sphaerolipoviridae|Unclassified|Gammasphaerolipovirus|Thermus virus P23-77
F-1		Fungi |Microsporidia | Chytridiopsida | Enterocytozoonidae | Enterocytozoon | Enterocytozoon bieneusi|Enterocytozoon bieneusi H348
F-2		Fungi|Dikarya|Ascomycota|Saccharomycetes|Saccharomycetales|Phaffomycetaceae|Wickerhamomyces |Wickerhamomyces ciferrii
F-3		Fungi |Ascomycota|Saccharomycetes|Saccharomycetales|Saccharomycetaceae|Cyberlindnera|C. jadinii|Cyberlindnera jadinii NRRL Y-1542
F-4		Ascomycota|Saccharomycetes|Saccharomycetales|Saccharomycetaceae|Saccharomyces|Saccharomyces cerevisiae|Saccharomyces cerevisiae S28
F-5		Eukaryota|Ascomycota|Sordariomycetes|Ophiostomatales|Ophiostomataceae|Grosmannia|Grosmannia clavigera|Grosmannia clavigera kw1407
F-6		Eukaryota|Basidiomycota|Ustilaginomycetes|Ustilaginales|Ustilaginaceae|Moesziomyces|Moesziomyces antarcticus|Unclassified
F-7		Eukaryota|Ascomycota|Eurotiomycetes|Eurotiales|Aspergillaceae|Aspergillus|Aspergillus flavus|Aspergillus flavus NRRL3357
F-8		Eukaryota|Ascomycota|Eurotiomycetes|Eurotiales|Aspergillaceae|Aspergillus|Aspergillus niger|Aspergillus niger CBS 513.88
F-9		Eukaryota|Basidiomycota|Malasseziomycetes|Malasseziales|Malasseziaceae|Malassezia|Malassezia globosa|Malassezia globosa CBS 7966
F-10		Eukaryota|Ascomycota|Eurotiomycetes|Eurotiales|Trichocomaceae|Talaromyces|Talaromyces stipitatus|Talaromyces stipitatus ATCC 10500
F-11		Eukaryota|Ascomycota|Saccharomycetes|Saccharomycetales|Metschnikowiaceae|Clavispora|Candida clade|[Candida] auris|Unclassified
F-12		Eukaryota|Ascomycota|Sordariomycetes|Sordariales|Sordariaceae|Sordaria|Sordaria macrospora|Sordaria macrospora k-hell
F-13		Eukaryota|Ascomycota|Orbiliomycetes|Orbiliales|Orbiliaceae|Arthrobotrys|Arthrobotrys oligospora|Arthrobotrys oligospora ATCC 24927
F-14		Eukaryota| Basidiomycota|Agaricomycotina| Agaricomycetes| Agaricomycetidae|Agaricales|Tricholomataceae| Omphalina
