# Supplementary material for: Bacteriophages in Gut Microbiome Interactions in Patients with Inflammatory Bowel Disease: Differences by Sex and The Disease Type
Source: Research Square preprint supplement (doi:10.21203/rs.3.rs-1240997/v1), 2022-01-13
Supplement: Supplementary file 2 [file 602aa17f36c96125cda56609.xlsx]

## Sheet: Description
Description of the Supplementary Tables
Table S8:	The microbe types in all of the patient and control feces collections (metagenomic taxonomic profiling).
Table S9:	Mean abundance sorting for diagnosis the most prevalent bacterial species in the groups.
Table S10:	Mean abundance sorting for diagnosis the most common viral species in the groups.
Table S11:	Mean abundance sorting for diagnosis the most abundant viral family in the groups.
Table S12:	Mean abundance sorting for diagnosis the most common fungus strains in the groups.
Table S13:	Mean abundance sorting for diagnosis the most common archaea species in the groups.

## Sheet: Table S8_Taxonomic profiling
Table S8:	Metagenomic Taxonomic Profiling
	(The Microbe Types in all of the Patient and Control Feces Collections).
Bacteria - (species)
1		c__Acidobacteriia	o__Acidobacteriales	f__Acidobacteriaceae	g__Granulicella	s__Granulicella_unclassified				B-1
2		c__Actinobacteria	o__Actinomycetales	f__Actinomycetaceae	g__Actinobaculum	s__Actinobaculum_schaalii				B-2
3		c__Actinobacteria	o__Actinomycetales	f__Actinomycetaceae	g__Actinobaculum	s__Actinobaculum_unclassified				B-3
4		c__Actinobacteria	o__Actinomycetales	f__Actinomycetaceae	g__Actinomyces	s__Actinomyces_graevenitzii				B-4
5		c__Actinobacteria	o__Actinomycetales	f__Actinomycetaceae	g__Actinomyces	s__Actinomyces_turicensis				B-5
6		c__Actinobacteria	o__Actinomycetales	f__Actinomycetaceae	g__Actinomyces	s__Actinomyces_urogenitalis				B-6
7		c__Actinobacteria	o__Coriobacteriales	f__Coriobacteriaceae	g__Adlercreutzia	s__Adlercreutzia_equolifaciens				B-7
8		c__Actinobacteria	o__Bifidobacteriales	f__Bifidobacteriaceae	g__Alloscardovia	s__Alloscardovia_omnicolens				B-8
9		c__Actinobacteria	o__Bifidobacteriales	f__Bifidobacteriaceae	g__Bifidobacterium	s__Bifidobacterium_adolescentis				B-9
10		c__Actinobacteria	o__Bifidobacteriales	f__Bifidobacteriaceae	g__Bifidobacterium	s__Bifidobacterium_animalis				B-10
11		c__Actinobacteria	o__Bifidobacteriales	f__Bifidobacteriaceae	g__Bifidobacterium	s__Bifidobacterium_asteroides				B-11
12		c__Actinobacteria	o__Bifidobacteriales	f__Bifidobacteriaceae	g__Bifidobacterium	s__Bifidobacterium_bifidum				B-12
13		c__Actinobacteria	o__Bifidobacteriales	f__Bifidobacteriaceae	g__Bifidobacterium	s__Bifidobacterium_breve				B-13
14		c__Actinobacteria	o__Bifidobacteriales	f__Bifidobacteriaceae	g__Bifidobacterium	s__Bifidobacterium_catenulatum				B-14
15		c__Actinobacteria	o__Bifidobacteriales	f__Bifidobacteriaceae	g__Bifidobacterium	s__Bifidobacterium_dentium				B-15
16		c__Actinobacteria	o__Bifidobacteriales	f__Bifidobacteriaceae	g__Bifidobacterium	s__Bifidobacterium_longum				B-16
17		c__Actinobacteria	o__Bifidobacteriales	f__Bifidobacteriaceae	g__Bifidobacterium	s__Bifidobacterium_pseudocatenulatum				B-17
18		c__Actinobacteria	o__Bifidobacteriales	f__Bifidobacteriaceae	g__Bifidobacterium	s__Bifidobacterium_pseudolongum				B-18
19		c__Actinobacteria	o__Actinomycetales	f__Dermabacteraceae	g__Brachybacterium	s__Brachybacterium_unclassified				B-19
20		c__Actinobacteria	o__Actinomycetales	f__Brevibacteriaceae	g__Brevibacterium	s__Brevibacterium_mcbrellneri				B-20
21		c__Actinobacteria	o__Coriobacteriales	f__Coriobacteriaceae	g__Collinsella	s__Collinsella_aerofaciens				B-21
22		c__Actinobacteria	o__Coriobacteriales	f__Coriobacteriaceae	g__Collinsella	s__Collinsella_intestinalis				B-22
23		c__Actinobacteria	o__Coriobacteriales	f__Coriobacteriaceae	g__Collinsella	s__Collinsella_stercoris				B-23
24		c__Actinobacteria	o__Coriobacteriales	f__Coriobacteriaceae	g__Collinsella	s__Collinsella_tanakaei				B-24
25		c__Actinobacteria	o__Coriobacteriales	f__Coriobacteriaceae	g__Collinsella	s__Collinsella_unclassified				B-25
26		c__Actinobacteria	o__Coriobacteriales	f__Coriobacteriaceae	g__Coriobacteriaceae_noname	s__Coriobacteriaceae_bacterium_phI				B-26
27		c__Actinobacteria	o__Actinomycetales	f__Corynebacteriaceae	g__Corynebacterium	s__Corynebacterium_accolens				B-27
28		c__Actinobacteria	o__Coriobacteriales	f__Coriobacteriaceae	g__Eggerthella	s__Eggerthella_lenta				B-28
29		c__Actinobacteria	o__Coriobacteriales	f__Coriobacteriaceae	g__Eggerthella	s__Eggerthella_unclassified				B-29
30		c__Actinobacteria	o__Bifidobacteriales	f__Bifidobacteriaceae	g__Gardnerella	s__Gardnerella_vaginalis				B-30
31		c__Actinobacteria	o__Coriobacteriales	f__Coriobacteriaceae	g__Gordonibacter	s__Gordonibacter_pamelaeae				B-31
32		c__Actinobacteria	o__Actinomycetales	f__Micrococcaceae	g__Kocuria	s__Kocuria_unclassified				B-32
33		c__Actinobacteria	o__Actinomycetales	f__Micrococcaceae	g__Micrococcus	s__Micrococcus_luteus				B-33
34		c__Actinobacteria	o__Actinomycetales	f__Propionibacteriaceae	g__Propionibacterium	s__Propionibacterium_acnes				B-34
35		c__Actinobacteria	o__Actinomycetales	f__Propionibacteriaceae	g__Propionibacterium	s__Propionibacterium_granulosum				B-35
36		c__Actinobacteria	o__Actinomycetales	f__Micrococcaceae	g__Rothia	s__Rothia_dentocariosa				B-36
37		c__Actinobacteria	o__Actinomycetales	f__Micrococcaceae	g__Rothia	s__Rothia_mucilaginosa				B-37
38		c__Actinobacteria	o__Actinomycetales	f__Micrococcaceae	g__Rothia	s__Rothia_unclassified				B-38
39		c__Actinobacteria	o__Bifidobacteriales	f__Bifidobacteriaceae	g__Scardovia	s__Scardovia_unclassified				B-39
40		c__Actinobacteria	o__Bifidobacteriales	f__Bifidobacteriaceae	g__Scardovia	s__Scardovia_wiggsiae				B-40
41		c__Actinobacteria	o__Coriobacteriales	f__Coriobacteriaceae	g__Slackia	s__Slackia_piriformis				B-41
42		c__Actinobacteria	o__Actinomycetales	f__Actinomycetaceae	g__Varibaculum	s__Varibaculum_cambriense				B-42
43		c__Bacteroidetes_noname	o__Bacteroidetes_noname	f__Bacteroidetes_noname	g__Bacteroidetes_noname	s__Bacteroidetes_oral_taxon_274				B-43
44		c__Bacteroidia	o__Bacteroidales	f__Rikenellaceae	g__Alistipes	s__Alistipes_finegoldii				B-44
45		c__Bacteroidia	o__Bacteroidales	f__Rikenellaceae	g__Alistipes	s__Alistipes_indistinctus				B-45
46		c__Bacteroidia	o__Bacteroidales	f__Rikenellaceae	g__Alistipes	s__Alistipes_onderdonkii				B-46
47		c__Bacteroidia	o__Bacteroidales	f__Rikenellaceae	g__Alistipes	s__Alistipes_putredinis				B-47
48		c__Bacteroidia	o__Bacteroidales	f__Rikenellaceae	g__Alistipes	s__Alistipes_senegalensis				B-48
49		c__Bacteroidia	o__Bacteroidales	f__Rikenellaceae	g__Alistipes	s__Alistipes_shahii				B-49
50		c__Bacteroidia	o__Bacteroidales	f__Rikenellaceae	g__Alistipes	s__Alistipes_sp_AP11				B-50
51		c__Bacteroidia	o__Bacteroidales	f__Rikenellaceae	g__Alistipes	s__Alistipes_sp_HGB5				B-51
52		c__Bacteroidia	o__Bacteroidales	f__Rikenellaceae	g__Alistipes	s__Alistipes_unclassified				B-52
53		c__Bacteroidia	o__Bacteroidales	f__Prevotellaceae	g__Alloprevotella	s__Alloprevotella_tannerae				B-53
54		c__Bacteroidia	o__Bacteroidales	f__Prevotellaceae	g__Alloprevotella	s__Alloprevotella_unclassified				B-54
55		c__Bacteroidia	o__Bacteroidales	f__Bacteroidales_noname	g__Bacteroidales_noname	s__Bacteroidales_bacterium_ph8				B-55
56		c__Bacteroidia	o__Bacteroidales	f__Bacteroidaceae	g__Bacteroides	s__Bacteroides_barnesiae				B-56
57		c__Bacteroidia	o__Bacteroidales	f__Bacteroidaceae	g__Bacteroides	s__Bacteroides_caccae				B-57
58		c__Bacteroidia	o__Bacteroidales	f__Bacteroidaceae	g__Bacteroides	s__Bacteroides_cellulosilyticus				B-58
59		c__Bacteroidia	o__Bacteroidales	f__Bacteroidaceae	g__Bacteroides	s__Bacteroides_clarus				B-59
60		c__Bacteroidia	o__Bacteroidales	f__Bacteroidaceae	g__Bacteroides	s__Bacteroides_coprocola				B-60
61		c__Bacteroidia	o__Bacteroidales	f__Bacteroidaceae	g__Bacteroides	s__Bacteroides_dorei				B-61
62		c__Bacteroidia	o__Bacteroidales	f__Bacteroidaceae	g__Bacteroides	s__Bacteroides_eggerthii				B-62
63		c__Bacteroidia	o__Bacteroidales	f__Bacteroidaceae	g__Bacteroides	s__Bacteroides_faecis				B-63
64		c__Bacteroidia	o__Bacteroidales	f__Bacteroidaceae	g__Bacteroides	s__Bacteroides_finegoldii				B-64
65		c__Bacteroidia	o__Bacteroidales	f__Bacteroidaceae	g__Bacteroides	s__Bacteroides_fluxus				B-65
66		c__Bacteroidia	o__Bacteroidales	f__Bacteroidaceae	g__Bacteroides	s__Bacteroides_fragilis				B-66
67		c__Bacteroidia	o__Bacteroidales	f__Bacteroidaceae	g__Bacteroides	s__Bacteroides_gallinarum				B-67
68		c__Bacteroidia	o__Bacteroidales	f__Bacteroidaceae	g__Bacteroides	s__Bacteroides_intestinalis				B-68
69		c__Bacteroidia	o__Bacteroidales	f__Bacteroidaceae	g__Bacteroides	s__Bacteroides_massiliensis				B-69
70		c__Bacteroidia	o__Bacteroidales	f__Bacteroidaceae	g__Bacteroides	s__Bacteroides_nordii				B-70
71		c__Bacteroidia	o__Bacteroidales	f__Bacteroidaceae	g__Bacteroides	s__Bacteroides_oleiciplenus				B-71
72		c__Bacteroidia	o__Bacteroidales	f__Bacteroidaceae	g__Bacteroides	s__Bacteroides_ovatus				B-72
73		c__Bacteroidia	o__Bacteroidales	f__Bacteroidaceae	g__Bacteroides	s__Bacteroides_plebeius				B-73
74		c__Bacteroidia	o__Bacteroidales	f__Bacteroidaceae	g__Bacteroides	s__Bacteroides_salyersiae				B-74
75		c__Bacteroidia	o__Bacteroidales	f__Bacteroidaceae	g__Bacteroides	s__Bacteroides_sp_1_1_30				B-75
76		c__Bacteroidia	o__Bacteroidales	f__Bacteroidaceae	g__Bacteroides	s__Bacteroides_sp_1_1_6				B-76
77		c__Bacteroidia	o__Bacteroidales	f__Bacteroidaceae	g__Bacteroides	s__Bacteroides_sp_2_1_22				B-77
78		c__Bacteroidia	o__Bacteroidales	f__Bacteroidaceae	g__Bacteroides	s__Bacteroides_sp_3_2_5				B-78
79		c__Bacteroidia	o__Bacteroidales	f__Bacteroidaceae	g__Bacteroides	s__Bacteroides_sp_4_3_47FAA				B-79
80		c__Bacteroidia	o__Bacteroidales	f__Bacteroidaceae	g__Bacteroides	s__Bacteroides_sp_9_1_42FAA				B-80
81		c__Bacteroidia	o__Bacteroidales	f__Bacteroidaceae	g__Bacteroides	s__Bacteroides_stercoris				B-81
82		c__Bacteroidia	o__Bacteroidales	f__Bacteroidaceae	g__Bacteroides	s__Bacteroides_thetaiotaomicron				B-82
83		c__Bacteroidia	o__Bacteroidales	f__Bacteroidaceae	g__Bacteroides	s__Bacteroides_xylanisolvens				B-83
84		c__Bacteroidia	o__Bacteroidales	f__Porphyromonadaceae	g__Barnesiella	s__Barnesiella_intestinihominis				B-84
85		c__Bacteroidia	o__Bacteroidales	f__Porphyromonadaceae	g__Butyricimonas	s__Butyricimonas_synergistica				B-85
86		c__Bacteroidia	o__Bacteroidales	f__Porphyromonadaceae	g__Coprobacter	s__Coprobacter_fastidiosus				B-86
87		c__Bacteroidia	o__Bacteroidales	f__Porphyromonadaceae	g__Dysgonomonas	s__Dysgonomonas_gadei				B-87
88		c__Bacteroidia	o__Bacteroidales	f__Porphyromonadaceae	g__Dysgonomonas	s__Dysgonomonas_mossii				B-88
89		c__Bacteroidia	o__Bacteroidales	f__Porphyromonadaceae	g__Dysgonomonas	s__Dysgonomonas_unclassified				B-89
90		c__Bacteroidia	o__Bacteroidales	f__Porphyromonadaceae	g__Odoribacter	s__Odoribacter_laneus				B-90
91		c__Bacteroidia	o__Bacteroidales	f__Porphyromonadaceae	g__Odoribacter	s__Odoribacter_splanchnicus				B-91
92		c__Bacteroidia	o__Bacteroidales	f__Porphyromonadaceae	g__Odoribacter	s__Odoribacter_unclassified				B-92
93		c__Bacteroidia	o__Bacteroidales	f__Porphyromonadaceae	g__Parabacteroides	s__Parabacteroides_distasonis				B-93
94		c__Bacteroidia	o__Bacteroidales	f__Porphyromonadaceae	g__Parabacteroides	s__Parabacteroides_goldsteinii				B-94
95		c__Bacteroidia	o__Bacteroidales	f__Porphyromonadaceae	g__Parabacteroides	s__Parabacteroides_johnsonii				B-95
96		c__Bacteroidia	o__Bacteroidales	f__Porphyromonadaceae	g__Parabacteroides	s__Parabacteroides_merdae				B-96
97		c__Bacteroidia	o__Bacteroidales	f__Porphyromonadaceae	g__Parabacteroides	s__Parabacteroides_sp_20_3				B-97
98		c__Bacteroidia	o__Bacteroidales	f__Porphyromonadaceae	g__Parabacteroides	s__Parabacteroides_sp_D13				B-98
99		c__Bacteroidia	o__Bacteroidales	f__Porphyromonadaceae	g__Parabacteroides	s__Parabacteroides_unclassified				B-99
100		c__Bacteroidia	o__Bacteroidales	f__Prevotellaceae	g__Paraprevotella	s__Paraprevotella_clara				B-100
101		c__Bacteroidia	o__Bacteroidales	f__Prevotellaceae	g__Paraprevotella	s__Paraprevotella_unclassified				B-101
102		c__Bacteroidia	o__Bacteroidales	f__Prevotellaceae	g__Paraprevotella	s__Paraprevotella_xylaniphila				B-102
103		c__Bacteroidia	o__Bacteroidales	f__Porphyromonadaceae	g__Porphyromonas	s__Porphyromonas_asaccharolytica				B-103
104		c__Bacteroidia	o__Bacteroidales	f__Porphyromonadaceae	g__Porphyromonas	s__Porphyromonas_bennonis				B-104
105		c__Bacteroidia	o__Bacteroidales	f__Porphyromonadaceae	g__Porphyromonas	s__Porphyromonas_endodontalis				B-105
106		c__Bacteroidia	o__Bacteroidales	f__Porphyromonadaceae	g__Porphyromonas	s__Porphyromonas_somerae				B-106
107		c__Bacteroidia	o__Bacteroidales	f__Porphyromonadaceae	g__Porphyromonas	s__Porphyromonas_uenonis				B-107
108		c__Bacteroidia	o__Bacteroidales	f__Prevotellaceae	g__Prevotella	s__Prevotella_amnii				B-108
109		c__Bacteroidia	o__Bacteroidales	f__Prevotellaceae	g__Prevotella	s__Prevotella_bergensis				B-109
110		c__Bacteroidia	o__Bacteroidales	f__Prevotellaceae	g__Prevotella	s__Prevotella_bivia				B-110
111		c__Bacteroidia	o__Bacteroidales	f__Prevotellaceae	g__Prevotella	s__Prevotella_buccae				B-111
112		c__Bacteroidia	o__Bacteroidales	f__Prevotellaceae	g__Prevotella	s__Prevotella_buccalis				B-112
113		c__Bacteroidia	o__Bacteroidales	f__Prevotellaceae	g__Prevotella	s__Prevotella_copri				B-113
114		c__Bacteroidia	o__Bacteroidales	f__Prevotellaceae	g__Prevotella	s__Prevotella_denticola				B-114
115		c__Bacteroidia	o__Bacteroidales	f__Prevotellaceae	g__Prevotella	s__Prevotella_disiens				B-115
116		c__Bacteroidia	o__Bacteroidales	f__Prevotellaceae	g__Prevotella	s__Prevotella_melaninogenica				B-116
117		c__Bacteroidia	o__Bacteroidales	f__Prevotellaceae	g__Prevotella	s__Prevotella_nigrescens				B-117
118		c__Bacteroidia	o__Bacteroidales	f__Prevotellaceae	g__Prevotella	s__Prevotella_oralis				B-118
119		c__Bacteroidia	o__Bacteroidales	f__Prevotellaceae	g__Prevotella	s__Prevotella_oris				B-119
120		c__Bacteroidia	o__Bacteroidales	f__Prevotellaceae	g__Prevotella	s__Prevotella_stercorea				B-120
121		c__Bacteroidia	o__Bacteroidales	f__Prevotellaceae	g__Prevotella	s__Prevotella_timonensis				B-121
122		c__Flavobacteriia	o__Flavobacteriales	f__Flavobacteriaceae	g__Cellulophaga	s__Cellulophaga_unclassified				B-122
123		c__Sphingobacteriia	o__Sphingobacteriales	f__Sphingobacteriaceae	g__Pedobacter	s__Pedobacter_unclassified				B-123
124		c__Deinococci	o__Deinococcales	f__Deinococcaceae	g__Deinococcus	s__Deinococcus_unclassified				B-124
125		c__Bacilli	o__Lactobacillales	f__Aerococcaceae	g__Abiotrophia	s__Abiotrophia_defectiva				B-125
126		c__Bacilli	o__Lactobacillales	f__Aerococcaceae	g__Aerococcus	s__Aerococcus_viridans				B-126
127		c__Bacilli	o__Bacillales	f__Bacillaceae	g__Bacillus	s__Bacillus_licheniformis				B-127
128		c__Bacilli	o__Lactobacillales	f__Enterococcaceae	g__Enterococcus	s__Enterococcus_asini				B-128
129		c__Bacilli	o__Lactobacillales	f__Enterococcaceae	g__Enterococcus	s__Enterococcus_avium				B-129
130		c__Bacilli	o__Lactobacillales	f__Enterococcaceae	g__Enterococcus	s__Enterococcus_casseliflavus				B-130
131		c__Bacilli	o__Lactobacillales	f__Enterococcaceae	g__Enterococcus	s__Enterococcus_dispar				B-131
132		c__Bacilli	o__Lactobacillales	f__Enterococcaceae	g__Enterococcus	s__Enterococcus_durans				B-132
133		c__Bacilli	o__Lactobacillales	f__Enterococcaceae	g__Enterococcus	s__Enterococcus_faecalis				B-133
134		c__Bacilli	o__Lactobacillales	f__Enterococcaceae	g__Enterococcus	s__Enterococcus_faecium				B-134
135		c__Bacilli	o__Lactobacillales	f__Enterococcaceae	g__Enterococcus	s__Enterococcus_gallinarum				B-135
136		c__Bacilli	o__Lactobacillales	f__Enterococcaceae	g__Enterococcus	s__Enterococcus_hirae				B-136
137		c__Bacilli	o__Lactobacillales	f__Enterococcaceae	g__Enterococcus	s__Enterococcus_mundtii				B-137
138		c__Bacilli	o__Lactobacillales	f__Aerococcaceae	g__Facklamia	s__Facklamia_unclassified				B-138
139		c__Bacilli	o__Bacillales	f__Bacillales_noname	g__Gemella	s__Gemella_haemolysans				B-139
140		c__Bacilli	o__Bacillales	f__Bacillales_noname	g__Gemella	s__Gemella_morbillorum				B-140
141		c__Bacilli	o__Lactobacillales	f__Carnobacteriaceae	g__Granulicatella	s__Granulicatella_adiacens				B-141
142		c__Bacilli	o__Lactobacillales	f__Carnobacteriaceae	g__Granulicatella	s__Granulicatella_elegans				B-142
143		c__Bacilli	o__Lactobacillales	f__Carnobacteriaceae	g__Granulicatella	s__Granulicatella_unclassified				B-143
144		c__Bacilli	o__Lactobacillales	f__Lactobacillaceae	g__Lactobacillus	s__Lactobacillus_acidophilus				B-144
145		c__Bacilli	o__Lactobacillales	f__Lactobacillaceae	g__Lactobacillus	s__Lactobacillus_animalis				B-145
146		c__Bacilli	o__Lactobacillales	f__Lactobacillaceae	g__Lactobacillus	s__Lactobacillus_casei_paracasei				B-146
147		c__Bacilli	o__Lactobacillales	f__Lactobacillaceae	g__Lactobacillus	s__Lactobacillus_crispatus				B-147
148		c__Bacilli	o__Lactobacillales	f__Lactobacillaceae	g__Lactobacillus	s__Lactobacillus_curvatus				B-148
149		c__Bacilli	o__Lactobacillales	f__Lactobacillaceae	g__Lactobacillus	s__Lactobacillus_delbrueckii				B-149
150		c__Bacilli	o__Lactobacillales	f__Lactobacillaceae	g__Lactobacillus	s__Lactobacillus_fermentum				B-150
151		c__Bacilli	o__Lactobacillales	f__Lactobacillaceae	g__Lactobacillus	s__Lactobacillus_gasseri				B-151
152		c__Bacilli	o__Lactobacillales	f__Lactobacillaceae	g__Lactobacillus	s__Lactobacillus_mucosae				B-152
153		c__Bacilli	o__Lactobacillales	f__Lactobacillaceae	g__Lactobacillus	s__Lactobacillus_oris				B-153
154		c__Bacilli	o__Lactobacillales	f__Lactobacillaceae	g__Lactobacillus	s__Lactobacillus_plantarum				B-154
155		c__Bacilli	o__Lactobacillales	f__Lactobacillaceae	g__Lactobacillus	s__Lactobacillus_reuteri				B-155
156		c__Bacilli	o__Lactobacillales	f__Lactobacillaceae	g__Lactobacillus	s__Lactobacillus_rhamnosus				B-156
157		c__Bacilli	o__Lactobacillales	f__Lactobacillaceae	g__Lactobacillus	s__Lactobacillus_ruminis				B-157
158		c__Bacilli	o__Lactobacillales	f__Lactobacillaceae	g__Lactobacillus	s__Lactobacillus_sakei				B-158
159		c__Bacilli	o__Lactobacillales	f__Lactobacillaceae	g__Lactobacillus	s__Lactobacillus_salivarius				B-159
160		c__Bacilli	o__Lactobacillales	f__Lactobacillaceae	g__Lactobacillus	s__Lactobacillus_sanfranciscensis				B-160
161		c__Bacilli	o__Lactobacillales	f__Lactobacillaceae	g__Lactobacillus	s__Lactobacillus_vaginalis				B-161
162		c__Bacilli	o__Lactobacillales	f__Streptococcaceae	g__Lactococcus	s__Lactococcus_garvieae				B-162
163		c__Bacilli	o__Lactobacillales	f__Streptococcaceae	g__Lactococcus	s__Lactococcus_lactis				B-163
164		c__Bacilli	o__Lactobacillales	f__Lactobacillaceae	g__Pediococcus	s__Pediococcus_acidilactici				B-164
165		c__Bacilli	o__Lactobacillales	f__Lactobacillaceae	g__Pediococcus	s__Pediococcus_lolii				B-165
166		c__Bacilli	o__Lactobacillales	f__Lactobacillaceae	g__Pediococcus	s__Pediococcus_pentosaceus				B-166
167		c__Bacilli	o__Lactobacillales	f__Lactobacillaceae	g__Pediococcus	s__Pediococcus_unclassified				B-167
168		c__Bacilli	o__Bacillales	f__Staphylococcaceae	g__Staphylococcus	s__Staphylococcus_aureus				B-168
169		c__Bacilli	o__Bacillales	f__Staphylococcaceae	g__Staphylococcus	s__Staphylococcus_epidermidis				B-169
170		c__Bacilli	o__Bacillales	f__Staphylococcaceae	g__Staphylococcus	s__Staphylococcus_hominis				B-170
171		c__Bacilli	o__Lactobacillales	f__Streptococcaceae	g__Streptococcus	s__Streptococcus_agalactiae				B-171
172		c__Bacilli	o__Lactobacillales	f__Streptococcaceae	g__Streptococcus	s__Streptococcus_anginosus				B-172
173		c__Bacilli	o__Lactobacillales	f__Streptococcaceae	g__Streptococcus	s__Streptococcus_australis				B-173
174		c__Bacilli	o__Lactobacillales	f__Streptococcaceae	g__Streptococcus	s__Streptococcus_cristatus				B-174
175		c__Bacilli	o__Lactobacillales	f__Streptococcaceae	g__Streptococcus	s__Streptococcus_gordonii				B-175
176		c__Bacilli	o__Lactobacillales	f__Streptococcaceae	g__Streptococcus	s__Streptococcus_infantarius				B-176
177		c__Bacilli	o__Lactobacillales	f__Streptococcaceae	g__Streptococcus	s__Streptococcus_infantis				B-177
178		c__Bacilli	o__Lactobacillales	f__Streptococcaceae	g__Streptococcus	s__Streptococcus_intermedius				B-178
179		c__Bacilli	o__Lactobacillales	f__Streptococcaceae	g__Streptococcus	s__Streptococcus_lutetiensis				B-179
180		c__Bacilli	o__Lactobacillales	f__Streptococcaceae	g__Streptococcus	s__Streptococcus_mitis_oralis_pneumoniae				B-180
181		c__Bacilli	o__Lactobacillales	f__Streptococcaceae	g__Streptococcus	s__Streptococcus_mutans				B-181
182		c__Bacilli	o__Lactobacillales	f__Streptococcaceae	g__Streptococcus	s__Streptococcus_parasanguinis				B-182
183		c__Bacilli	o__Lactobacillales	f__Streptococcaceae	g__Streptococcus	s__Streptococcus_peroris				B-183
184		c__Bacilli	o__Lactobacillales	f__Streptococcaceae	g__Streptococcus	s__Streptococcus_pseudopneumoniae				B-184
185		c__Bacilli	o__Lactobacillales	f__Streptococcaceae	g__Streptococcus	s__Streptococcus_salivarius				B-185
186		c__Bacilli	o__Lactobacillales	f__Streptococcaceae	g__Streptococcus	s__Streptococcus_sanguinis				B-186
187		c__Bacilli	o__Lactobacillales	f__Streptococcaceae	g__Streptococcus	s__Streptococcus_thermophilus				B-187
188		c__Bacilli	o__Lactobacillales	f__Streptococcaceae	g__Streptococcus	s__Streptococcus_vestibularis				B-188
189		c__Bacilli	o__Lactobacillales	f__Leuconostocaceae	g__Weissella	s__Weissella_cibaria				B-189
190		c__Bacilli	o__Lactobacillales	f__Leuconostocaceae	g__Weissella	s__Weissella_confusa				B-190
191		c__Bacilli	o__Lactobacillales	f__Leuconostocaceae	g__Weissella	s__Weissella_unclassified				B-191
192		c__Clostridia	o__Clostridiales	f__Clostridiales_Family_XI_Incertae_Sedis	g__Anaerococcus	s__Anaerococcus_obesiensis				B-192
193		c__Clostridia	o__Clostridiales	f__Clostridiales_Family_XI_Incertae_Sedis	g__Anaerococcus	s__Anaerococcus_vaginalis				B-193
194		c__Clostridia	o__Clostridiales	f__Eubacteriaceae	g__Anaerofustis	s__Anaerofustis_stercorihominis				B-194
195		c__Clostridia	o__Clostridiales	f__Lachnospiraceae	g__Anaerostipes	s__Anaerostipes_caccae				B-195
196		c__Clostridia	o__Clostridiales	f__Lachnospiraceae	g__Anaerostipes	s__Anaerostipes_hadrus				B-196
197		c__Clostridia	o__Clostridiales	f__Lachnospiraceae	g__Anaerostipes	s__Anaerostipes_unclassified				B-197
198		c__Clostridia	o__Clostridiales	f__Ruminococcaceae	g__Anaerotruncus	s__Anaerotruncus_colihominis				B-198
199		c__Clostridia	o__Clostridiales	f__Ruminococcaceae	g__Anaerotruncus	s__Anaerotruncus_unclassified				B-199
200		c__Clostridia	o__Clostridiales	f__Clostridiales_noname	g__Clostridiales_noname	s__Bacteroides_pectinophilus				B-200
201		c__Clostridia	o__Clostridiales	f__Lachnospiraceae	g__Blautia	s__Blautia_hansenii				B-201
202		c__Clostridia	o__Clostridiales	f__Lachnospiraceae	g__Blautia	s__Blautia_hydrogenotrophica				B-202
203		c__Clostridia	o__Clostridiales	f__Lachnospiraceae	g__Blautia	s__Blautia_producta				B-203
204		c__Clostridia	o__Clostridiales	f__Clostridiaceae	g__Butyricicoccus	s__Butyricicoccus_pullicaecorum				B-204
205		c__Clostridia	o__Clostridiales	f__Lachnospiraceae	g__Butyrivibrio	s__Butyrivibrio_crossotus				B-205
206		c__Clostridia	o__Clostridiales	f__Lachnospiraceae	g__Butyrivibrio	s__Butyrivibrio_unclassified				B-206
207		c__Clostridia	o__Clostridiales	f__Lachnospiraceae	g__Cellulosilyticum	s__Cellulosilyticum_lentocellum				B-207
208		c__Clostridia	o__Clostridiales	f__Clostridiaceae	g__Clostridiaceae_noname	s__Clostridiaceae_bacterium_JC118				B-208
209		c__Clostridia	o__Clostridiales	f__Clostridiales_noname	g__Clostridiales_noname	s__Clostridiales_bacterium_1_7_47FAA				B-209
210		c__Clostridia	o__Clostridiales	f__Clostridiales_Family_XI_Incertae_Sedis	g__Clostridiales_Family_XI_Incertae_Sedis_noname	s__Clostridiales_bacterium_BV3C26				B-210
211		c__Clostridia	o__Clostridiales	f__Clostridiaceae	g__Clostridium	s__Clostridium_asparagiforme				B-211
212		c__Clostridia	o__Clostridiales	f__Peptostreptococcaceae	g__Peptostreptococcaceae_noname	s__Clostridium_bartlettii				B-212
213		c__Clostridia	o__Clostridiales	f__Clostridiaceae	g__Clostridium	s__Clostridium_bolteae				B-213
214		c__Clostridia	o__Clostridiales	f__Clostridiaceae	g__Clostridium	s__Clostridium_butyricum				B-214
215		c__Clostridia	o__Clostridiales	f__Clostridiaceae	g__Clostridium	s__Clostridium_citroniae				B-215
216		c__Clostridia	o__Clostridiales	f__Clostridiaceae	g__Clostridium	s__Clostridium_clostridioforme				B-216
217		c__Clostridia	o__Clostridiales	f__Peptostreptococcaceae	g__Peptostreptococcaceae_noname	s__Clostridium_difficile				B-217
218		c__Clostridia	o__Clostridiales	f__Peptostreptococcaceae	g__Peptostreptococcaceae_noname	s__Clostridium_glycolicum				B-218
219		c__Clostridia	o__Clostridiales	f__Clostridiaceae	g__Clostridium	s__Clostridium_hathewayi				B-219
220		c__Clostridia	o__Clostridiales	f__Clostridiaceae	g__Clostridium	s__Clostridium_hylemonae				B-220
221		c__Clostridia	o__Clostridiales	f__Clostridiaceae	g__Clostridium	s__Clostridium_leptum				B-221
222		c__Clostridia	o__Clostridiales	f__Clostridiaceae	g__Clostridium	s__Clostridium_nexile				B-222
223		c__Clostridia	o__Clostridiales	f__Clostridiaceae	g__Clostridium	s__Clostridium_perfringens				B-223
224		c__Clostridia	o__Clostridiales	f__Clostridiaceae	g__Clostridium	s__Clostridium_scindens				B-224
225		c__Clostridia	o__Clostridiales	f__Clostridiaceae	g__Clostridium	s__Clostridium_sp_ATCC_BAA_442				B-225
226		c__Clostridia	o__Clostridiales	f__Clostridiaceae	g__Clostridium	s__Clostridium_sp_D5				B-226
227		c__Clostridia	o__Clostridiales	f__Clostridiaceae	g__Clostridium	s__Clostridium_sp_KLE_1755				B-227
228		c__Clostridia	o__Clostridiales	f__Clostridiaceae	g__Clostridium	s__Clostridium_sp_L2_50				B-228
229		c__Clostridia	o__Clostridiales	f__Clostridiaceae	g__Clostridium	s__Clostridium_sporogenes				B-229
230		c__Clostridia	o__Clostridiales	f__Clostridiaceae	g__Clostridium	s__Clostridium_symbiosum				B-230
231		c__Clostridia	o__Clostridiales	f__Lachnospiraceae	g__Coprococcus	s__Coprococcus_catus				B-231
232		c__Clostridia	o__Clostridiales	f__Lachnospiraceae	g__Coprococcus	s__Coprococcus_comes				B-232
233		c__Clostridia	o__Clostridiales	f__Lachnospiraceae	g__Coprococcus	s__Coprococcus_eutactus				B-233
234		c__Clostridia	o__Clostridiales	f__Lachnospiraceae	g__Coprococcus	s__Coprococcus_sp_ART55_1				B-234
235		c__Clostridia	o__Clostridiales	f__Lachnospiraceae	g__Dorea	s__Dorea_formicigenerans				B-235
236		c__Clostridia	o__Clostridiales	f__Lachnospiraceae	g__Dorea	s__Dorea_longicatena				B-236
237		c__Clostridia	o__Clostridiales	f__Lachnospiraceae	g__Dorea	s__Dorea_unclassified				B-237
238		c__Clostridia	o__Clostridiales	f__Eubacteriaceae	g__Eubacterium	s__Eubacterium_brachy				B-238
239		c__Clostridia	o__Clostridiales	f__Eubacteriaceae	g__Eubacterium	s__Eubacterium_eligens				B-239
240		c__Clostridia	o__Clostridiales	f__Eubacteriaceae	g__Eubacterium	s__Eubacterium_hallii				B-240
241		c__Clostridia	o__Clostridiales	f__Eubacteriaceae	g__Eubacterium	s__Eubacterium_limosum				B-241
242		c__Clostridia	o__Clostridiales	f__Eubacteriaceae	g__Eubacterium	s__Eubacterium_ramulus				B-242
243		c__Clostridia	o__Clostridiales	f__Eubacteriaceae	g__Eubacterium	s__Eubacterium_rectale				B-243
244		c__Clostridia	o__Clostridiales	f__Eubacteriaceae	g__Eubacterium	s__Eubacterium_siraeum				B-244
245		c__Clostridia	o__Clostridiales	f__Eubacteriaceae	g__Eubacterium	s__Eubacterium_sp_3_1_31				B-245
246		c__Clostridia	o__Clostridiales	f__Eubacteriaceae	g__Eubacterium	s__Eubacterium_ventriosum				B-246
247		c__Clostridia	o__Clostridiales	f__Ruminococcaceae	g__Faecalibacterium	s__Faecalibacterium_prausnitzii				B-247
248		c__Clostridia	o__Clostridiales	f__Clostridiales_Family_XI_Incertae_Sedis	g__Finegoldia	s__Finegoldia_magna				B-248
249		c__Clostridia	o__Clostridiales	f__Clostridiales_noname	g__Flavonifractor	s__Flavonifractor_plautii				B-249
250		c__Clostridia	o__Clostridiales	f__Lachnospiraceae	g__Lachnospiraceae_noname	s__Lachnospiraceae_bacterium_1_1_57FAA				B-250
251		c__Clostridia	o__Clostridiales	f__Lachnospiraceae	g__Lachnospiraceae_noname	s__Lachnospiraceae_bacterium_1_4_56FAA				B-251
252		c__Clostridia	o__Clostridiales	f__Lachnospiraceae	g__Lachnospiraceae_noname	s__Lachnospiraceae_bacterium_2_1_46FAA				B-252
253		c__Clostridia	o__Clostridiales	f__Lachnospiraceae	g__Lachnospiraceae_noname	s__Lachnospiraceae_bacterium_2_1_58FAA				B-253
254		c__Clostridia	o__Clostridiales	f__Lachnospiraceae	g__Lachnospiraceae_noname	s__Lachnospiraceae_bacterium_3_1_46FAA				B-254
255		c__Clostridia	o__Clostridiales	f__Lachnospiraceae	g__Lachnospiraceae_noname	s__Lachnospiraceae_bacterium_3_1_57FAA_CT1				B-255
256		c__Clostridia	o__Clostridiales	f__Lachnospiraceae	g__Lachnospiraceae_noname	s__Lachnospiraceae_bacterium_4_1_37FAA				B-256
257		c__Clostridia	o__Clostridiales	f__Lachnospiraceae	g__Lachnospiraceae_noname	s__Lachnospiraceae_bacterium_5_1_57FAA				B-257
258		c__Clostridia	o__Clostridiales	f__Lachnospiraceae	g__Lachnospiraceae_noname	s__Lachnospiraceae_bacterium_5_1_63FAA				B-258
259		c__Clostridia	o__Clostridiales	f__Lachnospiraceae	g__Lachnospiraceae_noname	s__Lachnospiraceae_bacterium_6_1_63FAA				B-259
260		c__Clostridia	o__Clostridiales	f__Lachnospiraceae	g__Lachnospiraceae_noname	s__Lachnospiraceae_bacterium_7_1_58FAA				B-260
261		c__Clostridia	o__Clostridiales	f__Lachnospiraceae	g__Lachnospiraceae_noname	s__Lachnospiraceae_bacterium_8_1_57FAA				B-261
262		c__Clostridia	o__Clostridiales	f__Lachnospiraceae	g__Lachnospiraceae_noname	s__Lachnospiraceae_bacterium_9_1_43BFAA				B-262
263		c__Clostridia	o__Clostridiales	f__Lachnospiraceae	g__Marvinbryantia	s__Marvinbryantia_formatexigens				B-263
264		c__Clostridia	o__Clostridiales	f__Oscillospiraceae	g__Oscillibacter	s__Oscillibacter_sp_KLE_1728				B-264
265		c__Clostridia	o__Clostridiales	f__Oscillospiraceae	g__Oscillibacter	s__Oscillibacter_sp_KLE_1745				B-265
266		c__Clostridia	o__Clostridiales	f__Oscillospiraceae	g__Oscillibacter	s__Oscillibacter_unclassified				B-266
267		c__Clostridia	o__Clostridiales	f__Clostridiales_Family_XI_Incertae_Sedis	g__Parvimonas	s__Parvimonas_micra				B-267
268		c__Clostridia	o__Clostridiales	f__Clostridiales_Family_XI_Incertae_Sedis	g__Parvimonas	s__Parvimonas_unclassified				B-268
269		c__Clostridia	o__Clostridiales	f__Clostridiales_Family_XI_Incertae_Sedis	g__Peptoniphilus	s__Peptoniphilus_harei				B-269
270		c__Clostridia	o__Clostridiales	f__Clostridiales_Family_XI_Incertae_Sedis	g__Peptoniphilus	s__Peptoniphilus_lacrimalis				B-270
271		c__Clostridia	o__Clostridiales	f__Peptostreptococcaceae	g__Peptostreptococcaceae_noname	s__Peptostreptococcaceae_noname_unclassified				B-271
272		c__Clostridia	o__Clostridiales	f__Peptostreptococcaceae	g__Peptostreptococcus	s__Peptostreptococcus_anaerobius				B-272
273		c__Clostridia	o__Clostridiales	f__Peptostreptococcaceae	g__Peptostreptococcus	s__Peptostreptococcus_stomatis				B-273
274		c__Clostridia	o__Clostridiales	f__Peptostreptococcaceae	g__Peptostreptococcus	s__Peptostreptococcus_unclassified				B-274
275		c__Clostridia	o__Clostridiales	f__Clostridiales_noname	g__Pseudoflavonifractor	s__Pseudoflavonifractor_capillosus				B-275
276		c__Clostridia	o__Clostridiales	f__Lachnospiraceae	g__Roseburia	s__Roseburia_hominis				B-276
277		c__Clostridia	o__Clostridiales	f__Lachnospiraceae	g__Roseburia	s__Roseburia_intestinalis				B-277
278		c__Clostridia	o__Clostridiales	f__Lachnospiraceae	g__Roseburia	s__Roseburia_inulinivorans				B-278
279		c__Clostridia	o__Clostridiales	f__Lachnospiraceae	g__Roseburia	s__Roseburia_unclassified				B-279
280		c__Clostridia	o__Clostridiales	f__Ruminococcaceae	g__Ruminococcaceae_noname	s__Ruminococcaceae_bacterium_D16				B-280
281		c__Clostridia	o__Clostridiales	f__Ruminococcaceae	g__Ruminococcus	s__Ruminococcus_albus				B-281
282		c__Clostridia	o__Clostridiales	f__Ruminococcaceae	g__Ruminococcus	s__Ruminococcus_bromii				B-282
283		c__Clostridia	o__Clostridiales	f__Ruminococcaceae	g__Ruminococcus	s__Ruminococcus_callidus				B-283
284		c__Clostridia	o__Clostridiales	f__Ruminococcaceae	g__Ruminococcus	s__Ruminococcus_champanellensis				B-284
285		c__Clostridia	o__Clostridiales	f__Ruminococcaceae	g__Ruminococcus	s__Ruminococcus_flavefaciens				B-285
286		c__Clostridia	o__Clostridiales	f__Lachnospiraceae	g__Blautia	s__Ruminococcus_gnavus				B-286
287		c__Clostridia	o__Clostridiales	f__Ruminococcaceae	g__Ruminococcus	s__Ruminococcus_lactaris				B-287
288		c__Clostridia	o__Clostridiales	f__Lachnospiraceae	g__Blautia	s__Ruminococcus_obeum				B-288
289		c__Clostridia	o__Clostridiales	f__Ruminococcaceae	g__Ruminococcus	s__Ruminococcus_sp_5_1_39BFAA				B-289
290		c__Clostridia	o__Clostridiales	f__Lachnospiraceae	g__Blautia	s__Ruminococcus_torques				B-290
291		c__Clostridia	o__Clostridiales	f__Ruminococcaceae	g__Subdoligranulum	s__Subdoligranulum_sp_4_3_54A2FAA				B-291
292		c__Clostridia	o__Clostridiales	f__Ruminococcaceae	g__Subdoligranulum	s__Subdoligranulum_unclassified				B-292
293		c__Clostridia	o__Clostridiales	f__Ruminococcaceae	g__Subdoligranulum	s__Subdoligranulum_variabile				B-293
294		c__Erysipelotrichia	o__Erysipelotrichales	f__Erysipelotrichaceae	g__Catenibacterium	s__Catenibacterium_mitsuokai				B-294
295		c__Erysipelotrichia	o__Erysipelotrichales	f__Erysipelotrichaceae	g__Erysipelotrichaceae_noname	s__Clostridium_innocuum				B-295
296		c__Erysipelotrichia	o__Erysipelotrichales	f__Erysipelotrichaceae	g__Erysipelotrichaceae_noname	s__Clostridium_ramosum				B-296
297		c__Erysipelotrichia	o__Erysipelotrichales	f__Erysipelotrichaceae	g__Erysipelotrichaceae_noname	s__Clostridium_spiroforme				B-297
298		c__Erysipelotrichia	o__Erysipelotrichales	f__Erysipelotrichaceae	g__Coprobacillus	s__Coprobacillus_sp_29_1				B-298
299		c__Erysipelotrichia	o__Erysipelotrichales	f__Erysipelotrichaceae	g__Coprobacillus	s__Coprobacillus_sp_D6				B-299
300		c__Erysipelotrichia	o__Erysipelotrichales	f__Erysipelotrichaceae	g__Coprobacillus	s__Coprobacillus_unclassified				B-300
301		c__Erysipelotrichia	o__Erysipelotrichales	f__Erysipelotrichaceae	g__Erysipelotrichaceae_noname	s__Erysipelotrichaceae_bacterium_2_2_44A				B-301
302		c__Erysipelotrichia	o__Erysipelotrichales	f__Erysipelotrichaceae	g__Erysipelotrichaceae_noname	s__Erysipelotrichaceae_bacterium_21_3				B-302
303		c__Erysipelotrichia	o__Erysipelotrichales	f__Erysipelotrichaceae	g__Erysipelotrichaceae_noname	s__Erysipelotrichaceae_bacterium_3_1_53				B-303
304		c__Erysipelotrichia	o__Erysipelotrichales	f__Erysipelotrichaceae	g__Erysipelotrichaceae_noname	s__Erysipelotrichaceae_bacterium_5_2_54FAA				B-304
305		c__Erysipelotrichia	o__Erysipelotrichales	f__Erysipelotrichaceae	g__Erysipelotrichaceae_noname	s__Erysipelotrichaceae_bacterium_6_1_45				B-305
306		c__Erysipelotrichia	o__Erysipelotrichales	f__Erysipelotrichaceae	g__Erysipelotrichaceae_noname	s__Eubacterium_biforme				B-306
307		c__Erysipelotrichia	o__Erysipelotrichales	f__Erysipelotrichaceae	g__Erysipelotrichaceae_noname	s__Eubacterium_cylindroides				B-307
308		c__Erysipelotrichia	o__Erysipelotrichales	f__Erysipelotrichaceae	g__Erysipelotrichaceae_noname	s__Eubacterium_dolichum				B-308
309		c__Erysipelotrichia	o__Erysipelotrichales	f__Erysipelotrichaceae	g__Holdemania	s__Holdemania_filiformis				B-309
310		c__Erysipelotrichia	o__Erysipelotrichales	f__Erysipelotrichaceae	g__Holdemania	s__Holdemania_unclassified				B-310
311		c__Erysipelotrichia	o__Erysipelotrichales	f__Erysipelotrichaceae	g__Solobacterium	s__Solobacterium_moorei				B-311
312		c__Erysipelotrichia	o__Erysipelotrichales	f__Erysipelotrichaceae	g__Turicibacter	s__Turicibacter_sanguinis				B-312
313		c__Erysipelotrichia	o__Erysipelotrichales	f__Erysipelotrichaceae	g__Turicibacter	s__Turicibacter_unclassified				B-313
314		c__Negativicutes	o__Selenomonadales	f__Acidaminococcaceae	g__Acidaminococcus	s__Acidaminococcus_intestini				B-314
315		c__Negativicutes	o__Selenomonadales	f__Acidaminococcaceae	g__Acidaminococcus	s__Acidaminococcus_unclassified				B-315
316		c__Negativicutes	o__Selenomonadales	f__Veillonellaceae	g__Anaeroglobus	s__Anaeroglobus_geminatus				B-316
317		c__Negativicutes	o__Selenomonadales	f__Veillonellaceae	g__Dialister	s__Dialister_invisus				B-317
318		c__Negativicutes	o__Selenomonadales	f__Veillonellaceae	g__Dialister	s__Dialister_micraerophilus				B-318
319		c__Negativicutes	o__Selenomonadales	f__Veillonellaceae	g__Megamonas	s__Megamonas_funiformis				B-319
320		c__Negativicutes	o__Selenomonadales	f__Veillonellaceae	g__Megamonas	s__Megamonas_hypermegale				B-320
321		c__Negativicutes	o__Selenomonadales	f__Veillonellaceae	g__Megamonas	s__Megamonas_rupellensis				B-321
322		c__Negativicutes	o__Selenomonadales	f__Veillonellaceae	g__Megamonas	s__Megamonas_unclassified				B-322
323		c__Negativicutes	o__Selenomonadales	f__Veillonellaceae	g__Megasphaera	s__Megasphaera_micronuciformis				B-323
324		c__Negativicutes	o__Selenomonadales	f__Veillonellaceae	g__Megasphaera	s__Megasphaera_unclassified				B-324
325		c__Negativicutes	o__Selenomonadales	f__Veillonellaceae	g__Mitsuokella	s__Mitsuokella_unclassified				B-325
326		c__Negativicutes	o__Selenomonadales	f__Acidaminococcaceae	g__Phascolarctobacterium	s__Phascolarctobacterium_succinatutens				B-326
327		c__Negativicutes	o__Selenomonadales	f__Veillonellaceae	g__Veillonella	s__Veillonella_atypica				B-327
328		c__Negativicutes	o__Selenomonadales	f__Veillonellaceae	g__Veillonella	s__Veillonella_dispar				B-328
329		c__Negativicutes	o__Selenomonadales	f__Veillonellaceae	g__Veillonella	s__Veillonella_parvula				B-329
330		c__Negativicutes	o__Selenomonadales	f__Veillonellaceae	g__Veillonella	s__Veillonella_ratti				B-330
331		c__Negativicutes	o__Selenomonadales	f__Veillonellaceae	g__Veillonella	s__Veillonella_unclassified				B-331
332		c__Fusobacteriia	o__Fusobacteriales	f__Fusobacteriaceae	g__Fusobacterium	s__Fusobacterium_mortiferum				B-332
333		c__Fusobacteriia	o__Fusobacteriales	f__Fusobacteriaceae	g__Fusobacterium	s__Fusobacterium_nucleatum				B-333
334		c__Fusobacteriia	o__Fusobacteriales	f__Fusobacteriaceae	g__Fusobacterium	s__Fusobacterium_periodonticum				B-334
335		c__Fusobacteriia	o__Fusobacteriales	f__Fusobacteriaceae	g__Fusobacterium	s__Fusobacterium_ulcerans				B-335
336		c__Betaproteobacteria	o__Burkholderiales	f__Burkholderiaceae	g__Burkholderia	s__Burkholderia_unclassified				B-336
337		c__Betaproteobacteria	o__Burkholderiales	f__Burkholderiales_noname	g__Burkholderiales_noname	s__Burkholderiales_bacterium_1_1_47				B-337
338		c__Betaproteobacteria	o__Burkholderiales	f__Comamonadaceae	g__Comamonas	s__Comamonas_unclassified				B-338
339		c__Betaproteobacteria	o__Neisseriales	f__Neisseriaceae	g__Kingella	s__Kingella_unclassified				B-339
340		c__Betaproteobacteria	o__Neisseriales	f__Neisseriaceae	g__Neisseria	s__Neisseria_unclassified				B-340
341		c__Betaproteobacteria	o__Burkholderiales	f__Oxalobacteraceae	g__Oxalobacter	s__Oxalobacter_formigenes				B-341
342		c__Betaproteobacteria	o__Burkholderiales	f__Sutterellaceae	g__Parasutterella	s__Parasutterella_excrementihominis				B-342
343		c__Betaproteobacteria	o__Burkholderiales	f__Sutterellaceae	g__Sutterella	s__Sutterella_wadsworthensis				B-343
344		c__Deltaproteobacteria	o__Desulfovibrionales	f__Desulfovibrionaceae	g__Bilophila	s__Bilophila_unclassified				B-344
345		c__Deltaproteobacteria	o__Desulfovibrionales	f__Desulfovibrionaceae	g__Bilophila	s__Bilophila_wadsworthia				B-345
346		c__Deltaproteobacteria	o__Desulfovibrionales	f__Desulfovibrionaceae	g__Desulfovibrio	s__Desulfovibrio_desulfuricans				B-346
347		c__Deltaproteobacteria	o__Desulfovibrionales	f__Desulfovibrionaceae	g__Desulfovibrio	s__Desulfovibrio_piger				B-347
348		c__Epsilonproteobacteria	o__Campylobacterales	f__Campylobacteraceae	g__Campylobacter	s__Campylobacter_concisus				B-348
349		c__Epsilonproteobacteria	o__Campylobacterales	f__Campylobacteraceae	g__Campylobacter	s__Campylobacter_gracilis				B-349
350		c__Epsilonproteobacteria	o__Campylobacterales	f__Campylobacteraceae	g__Campylobacter	s__Campylobacter_hominis				B-350
351		c__Epsilonproteobacteria	o__Campylobacterales	f__Campylobacteraceae	g__Campylobacter	s__Campylobacter_ureolyticus				B-351
352		c__Gammaproteobacteria	o__Pseudomonadales	f__Moraxellaceae	g__Acinetobacter	s__Acinetobacter_lwoffii				B-352
353		c__Gammaproteobacteria	o__Pasteurellales	f__Pasteurellaceae	g__Actinobacillus	s__Actinobacillus_unclassified				B-353
354		c__Gammaproteobacteria	o__Pasteurellales	f__Pasteurellaceae	g__Aggregatibacter	s__Aggregatibacter_segnis				B-354
355		c__Gammaproteobacteria	o__Pasteurellales	f__Pasteurellaceae	g__Aggregatibacter	s__Aggregatibacter_unclassified				B-355
356		c__Gammaproteobacteria	o__Enterobacteriales	f__Enterobacteriaceae	g__Citrobacter	s__Citrobacter_freundii				B-356
357		c__Gammaproteobacteria	o__Enterobacteriales	f__Enterobacteriaceae	g__Citrobacter	s__Citrobacter_unclassified				B-357
358		c__Gammaproteobacteria	o__Enterobacteriales	f__Enterobacteriaceae	g__Enterobacter	s__Enterobacter_aerogenes				B-358
359		c__Gammaproteobacteria	o__Enterobacteriales	f__Enterobacteriaceae	g__Enterobacter	s__Enterobacter_cloacae				B-359
360		c__Gammaproteobacteria	o__Enterobacteriales	f__Enterobacteriaceae	g__Enterobacteriaceae_noname	s__Enterobacteriaceae_bacterium_9_2_54FAA				B-360
361		c__Gammaproteobacteria	o__Enterobacteriales	f__Enterobacteriaceae	g__Escherichia	s__Escherichia_albertii				B-361
362		c__Gammaproteobacteria	o__Enterobacteriales	f__Enterobacteriaceae	g__Escherichia	s__Escherichia_coli				B-362
363		c__Gammaproteobacteria	o__Enterobacteriales	f__Enterobacteriaceae	g__Escherichia	s__Escherichia_sp_TW09276				B-363
364		c__Gammaproteobacteria	o__Enterobacteriales	f__Enterobacteriaceae	g__Escherichia	s__Escherichia_unclassified				B-364
365		c__Gammaproteobacteria	o__Pasteurellales	f__Pasteurellaceae	g__Haemophilus	s__Haemophilus_haemolyticus				B-365
366		c__Gammaproteobacteria	o__Pasteurellales	f__Pasteurellaceae	g__Haemophilus	s__Haemophilus_influenzae				B-366
367		c__Gammaproteobacteria	o__Pasteurellales	f__Pasteurellaceae	g__Haemophilus	s__Haemophilus_parainfluenzae				B-367
368		c__Gammaproteobacteria	o__Pasteurellales	f__Pasteurellaceae	g__Haemophilus	s__Haemophilus_paraphrohaemolyticus				B-368
369		c__Gammaproteobacteria	o__Pasteurellales	f__Pasteurellaceae	g__Haemophilus	s__Haemophilus_pittmaniae				B-369
370		c__Gammaproteobacteria	o__Pasteurellales	f__Pasteurellaceae	g__Haemophilus	s__Haemophilus_sputorum				B-370
371		c__Gammaproteobacteria	o__Enterobacteriales	f__Enterobacteriaceae	g__Hafnia	s__Hafnia_alvei				B-371
372		c__Gammaproteobacteria	o__Enterobacteriales	f__Enterobacteriaceae	g__Klebsiella	s__Klebsiella_oxytoca				B-372
373		c__Gammaproteobacteria	o__Enterobacteriales	f__Enterobacteriaceae	g__Klebsiella	s__Klebsiella_pneumoniae				B-373
374		c__Gammaproteobacteria	o__Enterobacteriales	f__Enterobacteriaceae	g__Klebsiella	s__Klebsiella_unclassified				B-374
375		c__Gammaproteobacteria	o__Enterobacteriales	f__Enterobacteriaceae	g__Morganella	s__Morganella_morganii				B-375
376		c__Gammaproteobacteria	o__Enterobacteriales	f__Enterobacteriaceae	g__Pantoea	s__Pantoea_ananatis				B-376
377		c__Gammaproteobacteria	o__Enterobacteriales	f__Enterobacteriaceae	g__Pantoea	s__Pantoea_unclassified				B-377
378		c__Gammaproteobacteria	o__Enterobacteriales	f__Enterobacteriaceae	g__Proteus	s__Proteus_mirabilis				B-378
379		c__Gammaproteobacteria	o__Enterobacteriales	f__Enterobacteriaceae	g__Proteus	s__Proteus_penneri				B-379
380		c__Gammaproteobacteria	o__Enterobacteriales	f__Enterobacteriaceae	g__Proteus	s__Proteus_unclassified				B-380
381		c__Gammaproteobacteria	o__Enterobacteriales	f__Enterobacteriaceae	g__Providencia	s__Providencia_unclassified				B-381
382		c__Gammaproteobacteria	o__Pseudomonadales	f__Pseudomonadaceae	g__Pseudomonas	s__Pseudomonas_aeruginosa				B-382
383		c__Gammaproteobacteria	o__Pseudomonadales	f__Pseudomonadaceae	g__Pseudomonas	s__Pseudomonas_mendocina				B-383
384		c__Gammaproteobacteria	o__Pseudomonadales	f__Pseudomonadaceae	g__Pseudomonas	s__Pseudomonas_unclassified				B-384
385		c__Gammaproteobacteria	o__Enterobacteriales	f__Enterobacteriaceae	g__Shigella	s__Shigella_flexneri				B-385
386		c__Gammaproteobacteria	o__Enterobacteriales	f__Enterobacteriaceae	g__Shigella	s__Shigella_sonnei				B-386
387		c__Spirochaetia	o__Spirochaetales	f__Brachyspiraceae	g__Brachyspira	s__Brachyspira_pilosicoli				B-387
388		c__Spirochaetia	o__Spirochaetales	f__Brachyspiraceae	g__Brachyspira	s__Brachyspira_unclassified				B-388
389		c__Spirochaetia	o__Spirochaetales	f__Spirochaetaceae	g__Treponema	s__Treponema_lecithinolyticum				B-389
390		c__Synergistia	o__Synergistales	f__Synergistaceae	g__Fretibacterium	s__Fretibacterium_fastidiosum				B-390
391		c__Synergistia	o__Synergistales	f__Synergistaceae	g__Jonquetella	s__Jonquetella_anthropi				B-391
392		c__Verrucomicrobiae	o__Verrucomicrobiales	f__Verrucomicrobiaceae	g__Akkermansia	s__Akkermansia_muciniphila				B-392
394		c__Bacteroidia	o__Bacteroidales	f__Bacteroidaceae	g__Bacteroides	s__Bacteroides_uniformis				B-394
395		c__Bacteroidia	o__Bacteroidales	f__Bacteroidaceae	g__Bacteroides	s__Bacteroides_vulgatus				B-395
Archaea -	Species
1		k__Archaea	p__Euryarchaeota	c__Methanobacteria	o__Methanobacteriales	f__Methanobacteriaceae	g__Methanobrevibacter	s__Methanobrevibacter_smithii				A-1
2		k__Archaea	p__Euryarchaeota	c__Methanobacteria	o__Methanobacteriales	f__Methanobacteriaceae	g__Methanobrevibacter	s__Methanobrevibacter_unclassified				A-2
VIRUS (Species)
1		Viruses|dsDNA viruses, no RNA stage|Caudovirales|Myoviridae|Ounavirinae|Unclassified|Enterobacteriaphage UAB_Phi87												V-1
2		Viruses|dsDNA viruses, no RNA stage|Caudovirales|Myoviridae|Ounavirinae|Unclassified|Escherichia phage EC6												V-2
3		Viruses|dsDNA viruses, no RNA stage|Caudovirales|Myoviridae|Ounavirinae|Unclassified|Escherichia phage vB_EcoM_AYO145A												V-3
4		Viruses|dsDNA viruses, no RNA stage|Caudovirales|Myoviridae|Ounavirinae|Unclassified|Escherichia phage vB_EcoM-VpaE1												V-4
5		Viruses|dsDNA viruses, no RNA stage|Caudovirales|Myoviridae|Ounavirinae|Unclassified|Escherichia phage wV8												V-5
6		Viruses|dsDNA viruses, no RNA stage|Caudovirales|Myoviridae|Ounavirinae|Unclassified|Salmonella phage vB_SPuM_SP116												V-6
7		Viruses|dsDNA viruses, no RNA stage|Caudovirales|Myoviridae|Peduovirinae|Hp1virus|Haemophilus phage HP1												V-7
8		Viruses|dsDNA viruses, no RNA stage|Caudovirales|Myoviridae|Peduovirinae|Hp1virus|Haemophilus phage HP2												V-8
9		Viruses|dsDNA viruses, no RNA stage|Caudovirales|Myoviridae|Peduovirinae|Hp1virus|Pasteurella phage F108												V-9
10		Viruses|dsDNA viruses, no RNA stage|Caudovirales|Myoviridae|Peduovirinae|P2virus|Enterobacteria phage fiAA91-ss												V-10
11		Viruses|dsDNA viruses, no RNA stage|Caudovirales|Myoviridae|Peduovirinae|P2virus|Enterobacteria phage P4												V-11
12		Viruses|dsDNA viruses, no RNA stage|Caudovirales|Myoviridae|Peduovirinae|P2virus|Enterobacteria phage WPhi												V-12
13		Viruses|dsDNA viruses, no RNA stage|Caudovirales|Myoviridae|Peduovirinae|P2virus|Escherichia phage pro147												V-13
14		Viruses|dsDNA viruses, no RNA stage|Caudovirales|Myoviridae|Peduovirinae|P2virus|Escherichia phage pro483												V-14
15		Viruses|dsDNA viruses, no RNA stage|Caudovirales|Myoviridae|Peduovirinae|P2virus|Escherichia virus 186												V-15
16		Viruses|dsDNA viruses, no RNA stage|Caudovirales|Myoviridae|Peduovirinae|P2virus|Escherichia virus P2												V-16
17		Viruses|dsDNA viruses, no RNA stage|Caudovirales|Myoviridae|Peduovirinae|P2virus|Salmonella phage FSL SP-004												V-17
18		Viruses|dsDNA viruses, no RNA stage|Caudovirales|Myoviridae|Peduovirinae|P2virus|Salmonella phage SEN1												V-18
19		Viruses|dsDNA viruses, no RNA stage|Caudovirales|Myoviridae|Peduovirinae|P2virus|Salmonella phage SEN4												V-19
20		Viruses|dsDNA viruses, no RNA stage|Caudovirales|Myoviridae|Peduovirinae|P2virus|Salmonella virus PsP3												V-20
21		Viruses|dsDNA viruses, no RNA stage|Caudovirales|Myoviridae|Peduovirinae|P2virus|Yersinia phage L-413C												V-21
22		Viruses|dsDNA viruses, no RNA stage|Caudovirales|Myoviridae|Spounavirinae|Kayvirus|Staphylococcus phage Team1												V-22
23		Viruses|dsDNA viruses, no RNA stage|Caudovirales|Myoviridae|Spounavirinae|Tsarbombavirus|Bacillus phage BCP78												V-23
24		Viruses|dsDNA viruses, no RNA stage|Caudovirales|Myoviridae|Spounavirinae|Tsarbombavirus|Bacillus phage TsarBomba												V-24
25		Viruses|dsDNA viruses, no RNA stage|Caudovirales|Myoviridae|Spounavirinae|unclassified Twortlikevirus|Staphylococcus phage vB_SauM_Remus												V-25
26		Viruses|dsDNA viruses, no RNA stage|Caudovirales|Myoviridae|Tevenvirinae|Jd18virus|Klebsiella phage JD18												V-26
27		Viruses|dsDNA viruses, no RNA stage|Caudovirales|Myoviridae|Tevenvirinae|Jd18virus|Klebsiella phage PKO111												V-27
28		Viruses|dsDNA viruses, no RNA stage|Caudovirales|Myoviridae|Tevenvirinae|Kp15virus|Klebsiella phage KP15												V-28
29		Viruses|dsDNA viruses, no RNA stage|Caudovirales|Myoviridae|Tevenvirinae|Kp15virus|Klebsiella phage KP27												V-29
30		Viruses|dsDNA viruses, no RNA stage|Caudovirales|Myoviridae|Tevenvirinae|Kp15virus|Klebsiella phage Matisse												V-30
31		Viruses|dsDNA viruses, no RNA stage|Caudovirales|Myoviridae|Tevenvirinae|Moonvirus|Citrobacter phage Merlin												V-31
32		Viruses|dsDNA viruses, no RNA stage|Caudovirales|Myoviridae|Tevenvirinae|Moonvirus|Citrobacter phage Moon												V-32
33		Viruses|dsDNA viruses, no RNA stage|Caudovirales|Myoviridae|Tevenvirinae|Rb49virus|Enterobacteria phage Phi1												V-33
34		Viruses|dsDNA viruses, no RNA stage|Caudovirales|Myoviridae|Tevenvirinae|S16virus|Salmonella phage STML-198												V-34
35		Viruses|dsDNA viruses, no RNA stage|Caudovirales|Myoviridae|Tevenvirinae|Schizot4virus|Vibrio phage nt-1												V-35
36		Viruses|dsDNA viruses, no RNA stage|Caudovirales|Myoviridae|Tevenvirinae|Schizot4virus|Vibrio phage ValKK3												V-36
37		Viruses|dsDNA viruses, no RNA stage|Caudovirales|Myoviridae|Tevenvirinae|Sp18virus|Escherichia phage vB_EcoM_VR26												V-37
38		Viruses|dsDNA viruses, no RNA stage|Caudovirales|Myoviridae|Tevenvirinae|T4virus|Acinetobacter phage Acj9												V-38
39		Viruses|dsDNA viruses, no RNA stage|Caudovirales|Myoviridae|Tevenvirinae|T4virus|Aeromonas phage phiAS5												V-39
40		Viruses|dsDNA viruses, no RNA stage|Caudovirales|Myoviridae|Tevenvirinae|T4virus|Aeromonas phage PX29												V-40
41		Viruses|dsDNA viruses, no RNA stage|Caudovirales|Myoviridae|Tevenvirinae|T4virus|Aeromonas virus Aeh1												V-41
42		Viruses|dsDNA viruses, no RNA stage|Caudovirales|Myoviridae|Tevenvirinae|T4virus|Citrobacter phage Margaery												V-42
43		Viruses|dsDNA viruses, no RNA stage|Caudovirales|Myoviridae|Tevenvirinae|T4virus|Enterobacteria phage GEC-3S												V-43
44		Viruses|dsDNA viruses, no RNA stage|Caudovirales|Myoviridae|Tevenvirinae|T4virus|Enterobacteria phage RB3												V-44
45		Viruses|dsDNA viruses, no RNA stage|Caudovirales|Myoviridae|Tevenvirinae|T4virus|Escherichia phage slur02												V-45
46		Viruses|dsDNA viruses, no RNA stage|Caudovirales|Myoviridae|Tevenvirinae|T4virus|Escherichia phage slur14												V-46
47		Viruses|dsDNA viruses, no RNA stage|Caudovirales|Myoviridae|Tevenvirinae|T4virus|Prochlorococcus phage P-SSM2												V-47
48		Viruses|dsDNA viruses, no RNA stage|Caudovirales|Myoviridae|Tevenvirinae|T4virus|Proteus phage vB_PmiM_Pm5461												V-48
49		Viruses|dsDNA viruses, no RNA stage|Caudovirales|Myoviridae|Tevenvirinae|T4virus|Salmonella phage STP4-a												V-49
50		Viruses|dsDNA viruses, no RNA stage|Caudovirales|Myoviridae|Tevenvirinae|T4virus|Shigella phage SHBML-50-1												V-50
51		Viruses|dsDNA viruses, no RNA stage|Caudovirales|Myoviridae|Tevenvirinae|T4virus|Shigella phage Shfl2												V-51
52		Viruses|dsDNA viruses, no RNA stage|Caudovirales|Myoviridae|Tevenvirinae|T4virus|Synechococcus phage S-RSM4												V-52
53		Viruses|dsDNA viruses, no RNA stage|Caudovirales|Myoviridae|unassigned Spounavirinae|Unclassified|Enterococcus phage phiEF24C												V-53
54		Viruses|dsDNA viruses, no RNA stage|Caudovirales|Myoviridae|unassigned Spounavirinae|Unclassified|Lactobacillus virus Lb338-1												V-54
55		Viruses|dsDNA viruses, no RNA stage|Caudovirales|Myoviridae|unclassified Spounavirinae|Unclassified|Brochothrix phage A9												V-55
56		Viruses|dsDNA viruses, no RNA stage|Caudovirales|Myoviridae|Unclassified|Biquartavirus|Aeromonas virus 44RR2												V-56
57		Viruses|dsDNA viruses, no RNA stage|Caudovirales|Myoviridae|Unclassified|Bxz1virus|Mycobacterium phage ArcherS7												V-57
58		Viruses|dsDNA viruses, no RNA stage|Caudovirales|Myoviridae|Unclassified|Bxz1virus|Mycobacterium phage Breeniome												V-58
59		Viruses|dsDNA viruses, no RNA stage|Caudovirales|Myoviridae|Unclassified|Bxz1virus|Mycobacterium phage LinStu												V-59
60		Viruses|dsDNA viruses, no RNA stage|Caudovirales|Myoviridae|Unclassified|Cd119virus|Clostridium virus phiC2												V-60
61		Viruses|dsDNA viruses, no RNA stage|Caudovirales|Myoviridae|Unclassified|Cd119virus|Clostridium virus phiCD119												V-61
62		Viruses|dsDNA viruses, no RNA stage|Caudovirales|Myoviridae|Unclassified|Cd119virus|Clostridium virus phiCD27												V-62
63		Viruses|dsDNA viruses, no RNA stage|Caudovirales|Myoviridae|Unclassified|Cp220virus|Campylobacter virus CP21												V-63
64		Viruses|dsDNA viruses, no RNA stage|Caudovirales|Myoviridae|Unclassified|Muvirus|Escherichia virus Mu												V-64
65		Viruses|dsDNA viruses, no RNA stage|Caudovirales|Myoviridae|Unclassified|Muvirus|Shigella phage SfMu												V-65
66		Viruses|dsDNA viruses, no RNA stage|Caudovirales|Myoviridae|Unclassified|P1virus|Escherichia virus P1												V-66
67		Viruses|dsDNA viruses, no RNA stage|Caudovirales|Myoviridae|Unclassified|Phikzvirus|Pseudomonas phage phiKZ												V-67
68		Viruses|dsDNA viruses, no RNA stage|Caudovirales|Myoviridae|Unclassified|Sep1virus|Staphylococcus phage phiIPLA-C1C												V-68
69		Viruses|dsDNA viruses, no RNA stage|Caudovirales|Myoviridae|Unclassified|unclassified Cd119virus|Clostridium phage phiCDHM11												V-69
70		Viruses|dsDNA viruses, no RNA stage|Caudovirales|Myoviridae|Unclassified|unclassified Punalikevirus|Salmonella phage SJ46												V-70
71		Viruses|dsDNA viruses, no RNA stage|Caudovirales|Myoviridae|Unclassified|Unclassified|Aggregatibacter phage S1249												V-71
72		Viruses|dsDNA viruses, no RNA stage|Caudovirales|Myoviridae|Unclassified|Unclassified|Bacillus phage 0305phi8-36												V-72
73		Viruses|dsDNA viruses, no RNA stage|Caudovirales|Myoviridae|Unclassified|Unclassified|Bacillus phage AR9												V-73
74		Viruses|dsDNA viruses, no RNA stage|Caudovirales|Myoviridae|Unclassified|Unclassified|Bacillus phage Bp8p-C												V-74
75		Viruses|dsDNA viruses, no RNA stage|Caudovirales|Myoviridae|Unclassified|Unclassified|Bacillus phage Mater												V-75
76		Viruses|dsDNA viruses, no RNA stage|Caudovirales|Myoviridae|Unclassified|Unclassified|Bacillus phage Moonbeam												V-76
77		Viruses|dsDNA viruses, no RNA stage|Caudovirales|Myoviridae|Unclassified|Unclassified|Bacillus phage phiAGATE												V-77
78		Viruses|dsDNA viruses, no RNA stage|Caudovirales|Myoviridae|Unclassified|Unclassified|Bacillus phage Shbh1												V-78
79		Viruses|dsDNA viruses, no RNA stage|Caudovirales|Myoviridae|Unclassified|Unclassified|Bacillus virus G												V-79
80		Viruses|dsDNA viruses, no RNA stage|Caudovirales|Myoviridae|Unclassified|Unclassified|Clostridium phage CDMH1												V-80
81		Viruses|dsDNA viruses, no RNA stage|Caudovirales|Myoviridae|Unclassified|Unclassified|Clostridium phage c-st												V-81
82		Viruses|dsDNA viruses, no RNA stage|Caudovirales|Myoviridae|Unclassified|Unclassified|Clostridium phage phiCD211												V-82
83		Viruses|dsDNA viruses, no RNA stage|Caudovirales|Myoviridae|Unclassified|Unclassified|Clostridium phage phiCD481-1												V-83
84		Viruses|dsDNA viruses, no RNA stage|Caudovirales|Myoviridae|Unclassified|Unclassified|Clostridium phage phiCD505												V-84
85		Viruses|dsDNA viruses, no RNA stage|Caudovirales|Myoviridae|Unclassified|Unclassified|Clostridium phage phiCD506												V-85
86		Viruses|dsDNA viruses, no RNA stage|Caudovirales|Myoviridae|Unclassified|Unclassified|Clostridium phage phiCDHM13												V-86
87		Viruses|dsDNA viruses, no RNA stage|Caudovirales|Myoviridae|Unclassified|Unclassified|Clostridium phage phiCDHM19												V-87
88		Viruses|dsDNA viruses, no RNA stage|Caudovirales|Myoviridae|Unclassified|Unclassified|Clostridium phage phiMMP01												V-88
89		Viruses|dsDNA viruses, no RNA stage|Caudovirales|Myoviridae|Unclassified|Unclassified|Clostridium phage phiMMP02												V-89
90		Viruses|dsDNA viruses, no RNA stage|Caudovirales|Myoviridae|Unclassified|Unclassified|Clostridium phage phiMMP03												V-90
91		Viruses|dsDNA viruses, no RNA stage|Caudovirales|Myoviridae|Unclassified|Unclassified|Clostridium phage phiMMP04												V-91
92		Viruses|dsDNA viruses, no RNA stage|Caudovirales|Myoviridae|Unclassified|Unclassified|Cronobacter phage CR5												V-92
93		Viruses|dsDNA viruses, no RNA stage|Caudovirales|Myoviridae|Unclassified|Unclassified|Cronobacter phage ENT47670												V-93
94		Viruses|dsDNA viruses, no RNA stage|Caudovirales|Myoviridae|Unclassified|Unclassified|Cronobacter phage S13												V-94
95		Viruses|dsDNA viruses, no RNA stage|Caudovirales|Myoviridae|Unclassified|Unclassified|Cronobacter phage vB_CsaM_GAP32												V-95
96		Viruses|dsDNA viruses, no RNA stage|Caudovirales|Myoviridae|Unclassified|Unclassified|Cyanophage S-RIM32												V-96
97		Viruses|dsDNA viruses, no RNA stage|Caudovirales|Myoviridae|Unclassified|Unclassified|Cyanophage S-RIM50												V-97
98		Viruses|dsDNA viruses, no RNA stage|Caudovirales|Myoviridae|Unclassified|Unclassified|Cyanophage S-TIM5												V-98
99		Viruses|dsDNA viruses, no RNA stage|Caudovirales|Myoviridae|Unclassified|Unclassified|Edwardsiella phage GF-2												V-99
100		Viruses|dsDNA viruses, no RNA stage|Caudovirales|Myoviridae|Unclassified|Unclassified|Edwardsiella phage MSW-3												V-100
101		Viruses|dsDNA viruses, no RNA stage|Caudovirales|Myoviridae|Unclassified|Unclassified|Edwardsiella phage PEi21												V-101
102		Viruses|dsDNA viruses, no RNA stage|Caudovirales|Myoviridae|Unclassified|Unclassified|Enterobacter phage Arya												V-102
103		Viruses|dsDNA viruses, no RNA stage|Caudovirales|Myoviridae|Unclassified|Unclassified|Enterobacteria phage P88												V-103
104		Viruses|dsDNA viruses, no RNA stage|Caudovirales|Myoviridae|Unclassified|Unclassified|Enterobacteria phage phi92												V-104
105		Viruses|dsDNA viruses, no RNA stage|Caudovirales|Myoviridae|Unclassified|Unclassified|Enterobacteria phage phiP27												V-105
106		Viruses|dsDNA viruses, no RNA stage|Caudovirales|Myoviridae|Unclassified|Unclassified|Enterobacteria phage SfI												V-106
107		Viruses|dsDNA viruses, no RNA stage|Caudovirales|Myoviridae|Unclassified|Unclassified|Enterobacteria phage SfV												V-107
108		Viruses|dsDNA viruses, no RNA stage|Caudovirales|Myoviridae|Unclassified|Unclassified|Enterococcus phage ECP3												V-108
109		Viruses|dsDNA viruses, no RNA stage|Caudovirales|Myoviridae|Unclassified|Unclassified|Enterococcus phage EFDG1												V-109
110		Viruses|dsDNA viruses, no RNA stage|Caudovirales|Myoviridae|Unclassified|Unclassified|Enterococcus phage EFLK1												V-110
111		Viruses|dsDNA viruses, no RNA stage|Caudovirales|Myoviridae|Unclassified|Unclassified|Erwinia phage Ea35-70												V-111
112		Viruses|dsDNA viruses, no RNA stage|Caudovirales|Myoviridae|Unclassified|Unclassified|Erwinia phage ENT90												V-112
113		Viruses|dsDNA viruses, no RNA stage|Caudovirales|Myoviridae|Unclassified|Unclassified|Erwinia phage vB_EamM_ChrisDB												V-113
114		Viruses|dsDNA viruses, no RNA stage|Caudovirales|Myoviridae|Unclassified|Unclassified|Erwinia phage vB_EamM_Huxley												V-114
115		Viruses|dsDNA viruses, no RNA stage|Caudovirales|Myoviridae|Unclassified|Unclassified|Erwinia phage vB_EamM_Kwan												V-115
116		Viruses|dsDNA viruses, no RNA stage|Caudovirales|Myoviridae|Unclassified|Unclassified|Escherichia phage Av-05												V-116
117		Viruses|dsDNA viruses, no RNA stage|Caudovirales|Myoviridae|Unclassified|Unclassified|Escherichia phage D108												V-117
118		Viruses|dsDNA viruses, no RNA stage|Caudovirales|Myoviridae|Unclassified|Unclassified|Escherichia phage ECML-117												V-118
119		Viruses|dsDNA viruses, no RNA stage|Caudovirales|Myoviridae|Unclassified|Unclassified|Escherichia phage vB_EcoM_Alf5												V-119
120		Viruses|dsDNA viruses, no RNA stage|Caudovirales|Myoviridae|Unclassified|Unclassified|Escherichia phage vB_EcoM-UFV13												V-120
121		Viruses|dsDNA viruses, no RNA stage|Caudovirales|Myoviridae|Unclassified|Unclassified|Flavobacterium phage FCL-2												V-121
122		Viruses|dsDNA viruses, no RNA stage|Caudovirales|Myoviridae|Unclassified|Unclassified|Haemophilus phage Aaphi23												V-122
123		Viruses|dsDNA viruses, no RNA stage|Caudovirales|Myoviridae|Unclassified|Unclassified|Haemophilus phage SuMu												V-123
124		Viruses|dsDNA viruses, no RNA stage|Caudovirales|Myoviridae|Unclassified|Unclassified|Iodobacteriophage phiPLPE												V-124
125		Viruses|dsDNA viruses, no RNA stage|Caudovirales|Myoviridae|Unclassified|Unclassified|Klebsiella phage vB_KpnM_KpV477												V-125
126		Viruses|dsDNA viruses, no RNA stage|Caudovirales|Myoviridae|Unclassified|Unclassified|Lactobacillus phage KC5a												V-126
127		Viruses|dsDNA viruses, no RNA stage|Caudovirales|Myoviridae|Unclassified|Unclassified|Lactobacillus phage LfeInf												V-127
128		Viruses|dsDNA viruses, no RNA stage|Caudovirales|Myoviridae|Unclassified|Unclassified|Lactobacillus phage phi jlb1												V-128
129		Viruses|dsDNA viruses, no RNA stage|Caudovirales|Myoviridae|Unclassified|Unclassified|Lactobacillus phage phiAQ113												V-129
130		Viruses|dsDNA viruses, no RNA stage|Caudovirales|Myoviridae|Unclassified|Unclassified|Mannheimia phage vB_MhM_3927AP2												V-130
131		Viruses|dsDNA viruses, no RNA stage|Caudovirales|Myoviridae|Unclassified|Unclassified|Morganella phage vB_MmoM_MP1												V-131
132		Viruses|dsDNA viruses, no RNA stage|Caudovirales|Myoviridae|Unclassified|Unclassified|Mycobacterium phage Myrna												V-132
133		Viruses|dsDNA viruses, no RNA stage|Caudovirales|Myoviridae|Unclassified|Unclassified|Mycobacterium phage Tonenili												V-133
134		Viruses|dsDNA viruses, no RNA stage|Caudovirales|Myoviridae|Unclassified|Unclassified|Pectobacterium phage ZF40												V-134
135		Viruses|dsDNA viruses, no RNA stage|Caudovirales|Myoviridae|Unclassified|Unclassified|Pseudomonas phage OBP												V-135
136		Viruses|dsDNA viruses, no RNA stage|Caudovirales|Myoviridae|Unclassified|Unclassified|Pseudomonas phage PaBG												V-136
137		Viruses|dsDNA viruses, no RNA stage|Caudovirales|Myoviridae|Unclassified|Unclassified|Pseudomonas phage phi3												V-137
138		Viruses|dsDNA viruses, no RNA stage|Caudovirales|Myoviridae|Unclassified|Unclassified|Pseudomonas phage PPpW-3												V-138
139		Viruses|dsDNA viruses, no RNA stage|Caudovirales|Myoviridae|Unclassified|Unclassified|Pseudomonas phage VCM												V-139
140		Viruses|dsDNA viruses, no RNA stage|Caudovirales|Myoviridae|Unclassified|Unclassified|Salmonella phage RE-2010												V-140
141		Viruses|dsDNA viruses, no RNA stage|Caudovirales|Myoviridae|Unclassified|Unclassified|Salmonella phage SEN34												V-141
142		Viruses|dsDNA viruses, no RNA stage|Caudovirales|Myoviridae|Unclassified|Unclassified|Salmonella phage SEN5												V-142
143		Viruses|dsDNA viruses, no RNA stage|Caudovirales|Myoviridae|Unclassified|Unclassified|Serratia phage phiMAM1												V-143
144		Viruses|dsDNA viruses, no RNA stage|Caudovirales|Myoviridae|Unclassified|Unclassified|Shewanella sp. phage 1/4												V-144
145		Viruses|dsDNA viruses, no RNA stage|Caudovirales|Myoviridae|Unclassified|Unclassified|Shigella phage SfII												V-145
146		Viruses|dsDNA viruses, no RNA stage|Caudovirales|Myoviridae|Unclassified|Unclassified|Shigella phage SfIV												V-146
147		Viruses|dsDNA viruses, no RNA stage|Caudovirales|Myoviridae|Unclassified|Unclassified|Sphingomonas phage PAU												V-147
148		Viruses|dsDNA viruses, no RNA stage|Caudovirales|Myoviridae|Unclassified|Unclassified|Staphylococcus phage SA1												V-148
149		Viruses|dsDNA viruses, no RNA stage|Caudovirales|Myoviridae|Unclassified|Unclassified|Streptococcus phage EJ-1												V-149
150		Viruses|dsDNA viruses, no RNA stage|Caudovirales|Myoviridae|Unclassified|Unclassified|Synechococcus phage S-IOM18												V-150
151		Viruses|dsDNA viruses, no RNA stage|Caudovirales|Myoviridae|Unclassified|Unclassified|Synechococcus phage S-RIM8 A.HR1												V-151
152		Viruses|dsDNA viruses, no RNA stage|Caudovirales|Myoviridae|Unclassified|Unclassified|Synechococcus phage S-SM1												V-152
153		Viruses|dsDNA viruses, no RNA stage|Caudovirales|Myoviridae|Unclassified|Unclassified|Synechococcus phage S-SM2												V-153
154		Viruses|dsDNA viruses, no RNA stage|Caudovirales|Myoviridae|Unclassified|Unclassified|Synechococcus phage S-SSM7												V-154
155		Viruses|dsDNA viruses, no RNA stage|Caudovirales|Myoviridae|Unclassified|Unclassified|Synechococcus phage S-WAM2												V-155
156		Viruses|dsDNA viruses, no RNA stage|Caudovirales|Myoviridae|Unclassified|Unclassified|Thermus phage TMA												V-156
157		Viruses|dsDNA viruses, no RNA stage|Caudovirales|Myoviridae|Unclassified|Unclassified|Yersinia phage phiR1-37												V-157
158		Viruses|dsDNA viruses, no RNA stage|Caudovirales|Myoviridae|Unclassified|Unclassified|Yersinia phage phiR1-RT												V-158
159		Viruses|dsDNA viruses, no RNA stage|Caudovirales|Podoviridae|Autographivirinae|T7virus|Citrobacter phage SH3												V-159
160		Viruses|dsDNA viruses, no RNA stage|Caudovirales|Podoviridae|Autographivirinae|T7virus|Enterobacteria phage EcoDS1												V-160
161		Viruses|dsDNA viruses, no RNA stage|Caudovirales|Podoviridae|Autographivirinae|T7virus|Enterobacteria phage K1F												V-161
162		Viruses|dsDNA viruses, no RNA stage|Caudovirales|Podoviridae|Autographivirinae|T7virus|Escherichia phage vB_EcoP_GA2A												V-162
163		Viruses|dsDNA viruses, no RNA stage|Caudovirales|Podoviridae|Autographivirinae|T7virus|Vibrio phage N4												V-163
164		Viruses|dsDNA viruses, no RNA stage|Caudovirales|Podoviridae|Picovirinae|Cp1virus|Streptococcus phage Cp-1												V-164
165		Viruses|dsDNA viruses, no RNA stage|Caudovirales|Podoviridae|Sepvirinae|Nona33virus|Enterobacteria phage 933W												V-165
166		Viruses|dsDNA viruses, no RNA stage|Caudovirales|Podoviridae|Sepvirinae|Nona33virus|Escherichia phage Min27												V-166
167		Viruses|dsDNA viruses, no RNA stage|Caudovirales|Podoviridae|Sepvirinae|Nona33virus|Escherichia phage Stx2 II												V-167
168		Viruses|dsDNA viruses, no RNA stage|Caudovirales|Podoviridae|Sepvirinae|Nona33virus|Escherichia phage vB_EcoP_24B												V-168
169		Viruses|dsDNA viruses, no RNA stage|Caudovirales|Podoviridae|Sepvirinae|Pocjvirus|Shigella phage 75/02 Stx												V-169
170		Viruses|dsDNA viruses, no RNA stage|Caudovirales|Podoviridae|Sepvirinae|Pocjvirus|Shigella phage POCJ13												V-170
171		Viruses|dsDNA viruses, no RNA stage|Caudovirales|Podoviridae|Sepvirinae|Tl2011virus|Escherichia phage PA2												V-171
172		Viruses|dsDNA viruses, no RNA stage|Caudovirales|Podoviridae|Sepvirinae|Tl2011virus|Escherichia phage phi191												V-172
173		Viruses|dsDNA viruses, no RNA stage|Caudovirales|Podoviridae|Sepvirinae|Tl2011virus|Escherichia phage TL-2011c												V-173
174		Viruses|dsDNA viruses, no RNA stage|Caudovirales|Podoviridae|Sepvirinae|Tl2011virus|Shigella phage Ss-VASD												V-174
175		Viruses|dsDNA viruses, no RNA stage|Caudovirales|Podoviridae|unassigned Picovirinae|Unclassified|Actinomyces virus Av1												V-175
176		Viruses|dsDNA viruses, no RNA stage|Caudovirales|Podoviridae|unclassified Autographivirinae|Unclassified|Escherichia phage LM33_P1												V-176
177		Viruses|dsDNA viruses, no RNA stage|Caudovirales|Podoviridae|Unclassified|N4virus|Escherichia phage N4												V-177
178		Viruses|dsDNA viruses, no RNA stage|Caudovirales|Podoviridae|Unclassified|P22virus|Enterobacteria phage ST104												V-178
179		Viruses|dsDNA viruses, no RNA stage|Caudovirales|Podoviridae|Unclassified|P22virus|Enterobacteria phage UAB_Phi20												V-179
180		Viruses|dsDNA viruses, no RNA stage|Caudovirales|Podoviridae|Unclassified|P22virus|Salmonella phage epsilon34												V-180
181		Viruses|dsDNA viruses, no RNA stage|Caudovirales|Podoviridae|Unclassified|P22virus|Salmonella phage g341c												V-181
182		Viruses|dsDNA viruses, no RNA stage|Caudovirales|Podoviridae|Unclassified|P22virus|Salmonella phage HK620												V-182
183		Viruses|dsDNA viruses, no RNA stage|Caudovirales|Podoviridae|Unclassified|P22virus|Salmonella phage SE1												V-183
184		Viruses|dsDNA viruses, no RNA stage|Caudovirales|Podoviridae|Unclassified|P22virus|Salmonella phage ST160												V-184
185		Viruses|dsDNA viruses, no RNA stage|Caudovirales|Podoviridae|Unclassified|P22virus|Salmonella phage ST64T												V-185
186		Viruses|dsDNA viruses, no RNA stage|Caudovirales|Podoviridae|Unclassified|P22virus|Salmonella phage vB_SemP_Emek												V-186
187		Viruses|dsDNA viruses, no RNA stage|Caudovirales|Podoviridae|Unclassified|P22virus|Salmonella virus P22												V-187
188		Viruses|dsDNA viruses, no RNA stage|Caudovirales|Podoviridae|Unclassified|P22virus|Shigella phage Sf6												V-188
189		Viruses|dsDNA viruses, no RNA stage|Caudovirales|Podoviridae|Unclassified|unclassified Epsilon15likevirus|Escherichia phage TL-2011b												V-189
190		Viruses|dsDNA viruses, no RNA stage|Caudovirales|Podoviridae|Unclassified|unclassified N4likevirus|Salmonella phage FSL SP-076												V-190
191		Viruses|dsDNA viruses, no RNA stage|Caudovirales|Podoviridae|Unclassified|Unclassified|Delftia phage RG-2014												V-191
192		Viruses|dsDNA viruses, no RNA stage|Caudovirales|Podoviridae|Unclassified|Unclassified|Enterobacter phage Tyrion												V-192
193		Viruses|dsDNA viruses, no RNA stage|Caudovirales|Podoviridae|Unclassified|Unclassified|Enterobacteria phage IME10												V-193
194		Viruses|dsDNA viruses, no RNA stage|Caudovirales|Podoviridae|Unclassified|Unclassified|Enterobacteria phage Sf101												V-194
195		Viruses|dsDNA viruses, no RNA stage|Caudovirales|Podoviridae|Unclassified|Unclassified|Enterobacteria phage VT2phi_272												V-195
196		Viruses|dsDNA viruses, no RNA stage|Caudovirales|Podoviridae|Unclassified|Unclassified|Enterobacteria phage VT2-Sakai												V-196
197		Viruses|dsDNA viruses, no RNA stage|Caudovirales|Podoviridae|Unclassified|Unclassified|Escherichia phage P13374												V-197
198		Viruses|dsDNA viruses, no RNA stage|Caudovirales|Podoviridae|Unclassified|Unclassified|Escherichia phage phiV10												V-198
199		Viruses|dsDNA viruses, no RNA stage|Caudovirales|Podoviridae|Unclassified|Unclassified|Escherichia phage Pollock												V-199
200		Viruses|dsDNA viruses, no RNA stage|Caudovirales|Podoviridae|Unclassified|Unclassified|Escherichia Stx1 converting phage												V-200
201		Viruses|dsDNA viruses, no RNA stage|Caudovirales|Podoviridae|Unclassified|Unclassified|Hamiltonella virus APSE1												V-201
202		Viruses|dsDNA viruses, no RNA stage|Caudovirales|Podoviridae|Unclassified|Unclassified|Pectobacterium phage PP90												V-202
203		Viruses|dsDNA viruses, no RNA stage|Caudovirales|Podoviridae|Unclassified|Unclassified|Salmonella phage 103203_sal5												V-203
204		Viruses|dsDNA viruses, no RNA stage|Caudovirales|Podoviridae|Unclassified|Unclassified|Salmonella phage 118970_sal4												V-204
205		Viruses|dsDNA viruses, no RNA stage|Caudovirales|Podoviridae|Unclassified|Unclassified|Salmonella phage 9NA												V-205
206		Viruses|dsDNA viruses, no RNA stage|Caudovirales|Podoviridae|Unclassified|Unclassified|Salmonella phage epsilon15												V-206
207		Viruses|dsDNA viruses, no RNA stage|Caudovirales|Podoviridae|Unclassified|Unclassified|Salmonella phage SEN22												V-207
208		Viruses|dsDNA viruses, no RNA stage|Caudovirales|Podoviridae|Unclassified|Unclassified|Salmonella phage SPN1S												V-208
209		Viruses|dsDNA viruses, no RNA stage|Caudovirales|Podoviridae|Unclassified|Unclassified|Salmonella phage SPN9CC												V-209
210		Viruses|dsDNA viruses, no RNA stage|Caudovirales|Podoviridae|Unclassified|Unclassified|Streptococcus phage Str-PAP-1												V-210
211		Viruses|dsDNA viruses, no RNA stage|Caudovirales|Podoviridae|Unclassified|Unclassified|Stx2-converting phage 86												V-211
212		Viruses|dsDNA viruses, no RNA stage|Caudovirales|Podoviridae|Unclassified|Unclassified|Vibrio phage phi 1												V-212
213		Viruses|dsDNA viruses, no RNA stage|Caudovirales|Siphoviridae|Guernseyvirinae|Jerseyvirus|Salmonella phage Ent1												V-213
214		Viruses|dsDNA viruses, no RNA stage|Caudovirales|Siphoviridae|Guernseyvirinae|Jerseyvirus|Salmonella phage Jersey												V-214
215		Viruses|dsDNA viruses, no RNA stage|Caudovirales|Siphoviridae|Guernseyvirinae|Jerseyvirus|Salmonella phage L13												V-215
216		Viruses|dsDNA viruses, no RNA stage|Caudovirales|Siphoviridae|Guernseyvirinae|Jerseyvirus|Salmonella phage LSPA1												V-216
217		Viruses|dsDNA viruses, no RNA stage|Caudovirales|Siphoviridae|Guernseyvirinae|Jerseyvirus|Salmonella phage SE2												V-217
218		Viruses|dsDNA viruses, no RNA stage|Caudovirales|Siphoviridae|Guernseyvirinae|Jerseyvirus|Salmonella phage SETP13												V-218
219		Viruses|dsDNA viruses, no RNA stage|Caudovirales|Siphoviridae|Guernseyvirinae|Jerseyvirus|Salmonella phage SETP3												V-219
220		Viruses|dsDNA viruses, no RNA stage|Caudovirales|Siphoviridae|Guernseyvirinae|Jerseyvirus|Salmonella phage SS3e												V-220
221		Viruses|dsDNA viruses, no RNA stage|Caudovirales|Siphoviridae|Guernseyvirinae|K1gvirus|Escherichia phage K1-dep(1)												V-221
222		Viruses|dsDNA viruses, no RNA stage|Caudovirales|Siphoviridae|Guernseyvirinae|K1gvirus|Escherichia phage K1-dep(4)												V-222
223		Viruses|dsDNA viruses, no RNA stage|Caudovirales|Siphoviridae|Tunavirinae|Kp36virus|Klebsiella phage 1513												V-223
224		Viruses|dsDNA viruses, no RNA stage|Caudovirales|Siphoviridae|Tunavirinae|Kp36virus|Klebsiella phage KLPN1												V-224
225		Viruses|dsDNA viruses, no RNA stage|Caudovirales|Siphoviridae|Tunavirinae|Kp36virus|Klebsiella phage KP36												V-225
226		Viruses|dsDNA viruses, no RNA stage|Caudovirales|Siphoviridae|Tunavirinae|Kp36virus|Klebsiella phage PKP126												V-226
227		Viruses|dsDNA viruses, no RNA stage|Caudovirales|Siphoviridae|Tunavirinae|Kp36virus|Klebsiella phage Sushi												V-227
228		Viruses|dsDNA viruses, no RNA stage|Caudovirales|Siphoviridae|Tunavirinae|Rtpvirus|Escherichia phage vB_Eco_ACG-M12												V-228
229		Viruses|dsDNA viruses, no RNA stage|Caudovirales|Siphoviridae|Tunavirinae|T1virus|Escherichia phage ADB-2												V-229
230		Viruses|dsDNA viruses, no RNA stage|Caudovirales|Siphoviridae|Tunavirinae|T1virus|Shigella virus Shfl1												V-230
231		Viruses|dsDNA viruses, no RNA stage|Caudovirales|Siphoviridae|Tunavirinae|Tlsvirus|Citrobacter virus Stevie												V-231
232		Viruses|dsDNA viruses, no RNA stage|Caudovirales|Siphoviridae|Tunavirinae|Tlsvirus|Escherichia virus TLS												V-232
233		Viruses|dsDNA viruses, no RNA stage|Caudovirales|Siphoviridae|Tunavirinae|unclassified Tunalikevirus|Cronobacter virus ESP29491												V-233
234		Viruses|dsDNA viruses, no RNA stage|Caudovirales|Siphoviridae|Unclassified|C2likevirus|Lactococcus phage bIL67												V-234
235		Viruses|dsDNA viruses, no RNA stage|Caudovirales|Siphoviridae|Unclassified|C2virus|Lactococcus phage D4410												V-235
236		Viruses|dsDNA viruses, no RNA stage|Caudovirales|Siphoviridae|Unclassified|C2virus|Lactococcus phage D4412												V-236
237		Viruses|dsDNA viruses, no RNA stage|Caudovirales|Siphoviridae|Unclassified|C2virus|Lactococcus phage M5938												V-237
238		Viruses|dsDNA viruses, no RNA stage|Caudovirales|Siphoviridae|Unclassified|C2virus|Lactococcus phage M6162												V-238
239		Viruses|dsDNA viruses, no RNA stage|Caudovirales|Siphoviridae|Unclassified|C2virus|Lactococcus phage M6165												V-239
240		Viruses|dsDNA viruses, no RNA stage|Caudovirales|Siphoviridae|Unclassified|C2virus|Lactococcus virus c2												V-240
241		Viruses|dsDNA viruses, no RNA stage|Caudovirales|Siphoviridae|Unclassified|Cecivirus|Bacillus virus 250												V-241
242		Viruses|dsDNA viruses, no RNA stage|Caudovirales|Siphoviridae|Unclassified|Cecivirus|Bacillus virus IEBH												V-242
243		Viruses|dsDNA viruses, no RNA stage|Caudovirales|Siphoviridae|Unclassified|Eiauvirus|Edwardsiella phage eiAU-183												V-243
244		Viruses|dsDNA viruses, no RNA stage|Caudovirales|Siphoviridae|Unclassified|Jwxvirus|Achromobacter phage JWX												V-244
245		Viruses|dsDNA viruses, no RNA stage|Caudovirales|Siphoviridae|Unclassified|L5virus|Mycobacterium virus Pukovnik												V-245
246		Viruses|dsDNA viruses, no RNA stage|Caudovirales|Siphoviridae|Unclassified|L5virus|Rhodococcus phage RGL3												V-246
247		Viruses|dsDNA viruses, no RNA stage|Caudovirales|Siphoviridae|Unclassified|Lambdavirus|Escherichia virus HK022												V-247
248		Viruses|dsDNA viruses, no RNA stage|Caudovirales|Siphoviridae|Unclassified|Lambdavirus|Escherichia virus HK97												V-248
249		Viruses|dsDNA viruses, no RNA stage|Caudovirales|Siphoviridae|Unclassified|Lambdavirus|Escherichia virus Lambda												V-249
250		Viruses|dsDNA viruses, no RNA stage|Caudovirales|Siphoviridae|Unclassified|Mudcatvirus|Arthrobacter phage Mudcat												V-250
251		Viruses|dsDNA viruses, no RNA stage|Caudovirales|Siphoviridae|Unclassified|N15virus|Escherichia virus N15												V-251
252		Viruses|dsDNA viruses, no RNA stage|Caudovirales|Siphoviridae|Unclassified|Nonagvirus|Enterobacteria phage 9g												V-252
253		Viruses|dsDNA viruses, no RNA stage|Caudovirales|Siphoviridae|Unclassified|Nonagvirus|Enterobacteria phage JenK1												V-253
254		Viruses|dsDNA viruses, no RNA stage|Caudovirales|Siphoviridae|Unclassified|Nonagvirus|Enterobacteria phage JenP1												V-254
255		Viruses|dsDNA viruses, no RNA stage|Caudovirales|Siphoviridae|Unclassified|Nonagvirus|Enterobacteria phage JenP2												V-255
256		Viruses|dsDNA viruses, no RNA stage|Caudovirales|Siphoviridae|Unclassified|Pa6virus|Propionibacterium phage P105												V-256
257		Viruses|dsDNA viruses, no RNA stage|Caudovirales|Siphoviridae|Unclassified|Pepy6virus|Rhodococcus phage ReqiPepy6												V-257
258		Viruses|dsDNA viruses, no RNA stage|Caudovirales|Siphoviridae|Unclassified|Pepy6virus|Rhodococcus phage ReqiPoco6												V-258
259		Viruses|dsDNA viruses, no RNA stage|Caudovirales|Siphoviridae|Unclassified|Phicbkvirus|Caulobacter virus Rogue												V-259
260		Viruses|dsDNA viruses, no RNA stage|Caudovirales|Siphoviridae|Unclassified|Phietavirus|Staphylococcus virus CNPH82												V-260
261		Viruses|dsDNA viruses, no RNA stage|Caudovirales|Siphoviridae|Unclassified|Phietavirus|Staphylococcus virus EW												V-261
262		Viruses|dsDNA viruses, no RNA stage|Caudovirales|Siphoviridae|Unclassified|Phietavirus|Staphylococcus virus IPLA7												V-262
263		Viruses|dsDNA viruses, no RNA stage|Caudovirales|Siphoviridae|Unclassified|Phietavirus|Staphylococcus virus phiMR25												V-263
264		Viruses|dsDNA viruses, no RNA stage|Caudovirales|Siphoviridae|Unclassified|Phifelvirus|Enterococcus phage phiFL1A												V-264
265		Viruses|dsDNA viruses, no RNA stage|Caudovirales|Siphoviridae|Unclassified|Phifelvirus|Enterococcus phage phiFL2A												V-265
266		Viruses|dsDNA viruses, no RNA stage|Caudovirales|Siphoviridae|Unclassified|Phifelvirus|Enterococcus phage phiFL3A												V-266
267		Viruses|dsDNA viruses, no RNA stage|Caudovirales|Siphoviridae|Unclassified|Phijl1virus|Lactobacillus virus ATCC8014												V-267
268		Viruses|dsDNA viruses, no RNA stage|Caudovirales|Siphoviridae|Unclassified|Phijl1virus|Lactobacillus virus phiJL1												V-268
269		Viruses|dsDNA viruses, no RNA stage|Caudovirales|Siphoviridae|Unclassified|Sap6virus|Enterococcus phage BC611												V-269
270		Viruses|dsDNA viruses, no RNA stage|Caudovirales|Siphoviridae|Unclassified|Sap6virus|Enterococcus phage VD13												V-270
271		Viruses|dsDNA viruses, no RNA stage|Caudovirales|Siphoviridae|Unclassified|Sap6virus|Streptococcus phage SPQS1												V-271
272		Viruses|dsDNA viruses, no RNA stage|Caudovirales|Siphoviridae|Unclassified|Sfi11virus|Streptococcus virus 2972												V-272
273		Viruses|dsDNA viruses, no RNA stage|Caudovirales|Siphoviridae|Unclassified|Sfi11virus|Streptococcus virus 858												V-273
274		Viruses|dsDNA viruses, no RNA stage|Caudovirales|Siphoviridae|Unclassified|Sfi11virus|Streptococcus virus ALQ132												V-274
275		Viruses|dsDNA viruses, no RNA stage|Caudovirales|Siphoviridae|Unclassified|Sfi11virus|Streptococcus virus O1205												V-275
276		Viruses|dsDNA viruses, no RNA stage|Caudovirales|Siphoviridae|Unclassified|Sfi21dt1virus|Streptococcus virus 7201												V-276
277		Viruses|dsDNA viruses, no RNA stage|Caudovirales|Siphoviridae|Unclassified|Sfi21dt1virus|Streptococcus virus DT1												V-277
278		Viruses|dsDNA viruses, no RNA stage|Caudovirales|Siphoviridae|Unclassified|Sfi21dt1virus|Streptococcus virus phiAbc2												V-278
279		Viruses|dsDNA viruses, no RNA stage|Caudovirales|Siphoviridae|Unclassified|Sfi21dt1virus|Streptococcus virus Sfi19												V-279
280		Viruses|dsDNA viruses, no RNA stage|Caudovirales|Siphoviridae|Unclassified|Sfi21dt1virus|Streptococcus virus Sfi21												V-280
281		Viruses|dsDNA viruses, no RNA stage|Caudovirales|Siphoviridae|Unclassified|Sk1virus|Lactococcus virus 712												V-281
282		Viruses|dsDNA viruses, no RNA stage|Caudovirales|Siphoviridae|Unclassified|Sk1virus|Lactococcus virus ASCC191												V-282
283		Viruses|dsDNA viruses, no RNA stage|Caudovirales|Siphoviridae|Unclassified|Sk1virus|Lactococcus virus Bibb29												V-283
284		Viruses|dsDNA viruses, no RNA stage|Caudovirales|Siphoviridae|Unclassified|Sk1virus|Lactococcus virus bIL170												V-284
285		Viruses|dsDNA viruses, no RNA stage|Caudovirales|Siphoviridae|Unclassified|Sk1virus|Lactococcus virus CB13												V-285
286		Viruses|dsDNA viruses, no RNA stage|Caudovirales|Siphoviridae|Unclassified|Sk1virus|Lactococcus virus CB14												V-286
287		Viruses|dsDNA viruses, no RNA stage|Caudovirales|Siphoviridae|Unclassified|Sk1virus|Lactococcus virus jj50												V-287
288		Viruses|dsDNA viruses, no RNA stage|Caudovirales|Siphoviridae|Unclassified|Sk1virus|Lactococcus virus P008												V-288
289		Viruses|dsDNA viruses, no RNA stage|Caudovirales|Siphoviridae|Unclassified|Sk1virus|Lactococcus virus sk1												V-289
290		Viruses|dsDNA viruses, no RNA stage|Caudovirales|Siphoviridae|Unclassified|Sk1virus|Lactococcus virus Sl4												V-290
291		Viruses|dsDNA viruses, no RNA stage|Caudovirales|Siphoviridae|Unclassified|Smoothievirus|Gordonia phage ClubL												V-291
292		Viruses|dsDNA viruses, no RNA stage|Caudovirales|Siphoviridae|Unclassified|T5virus|Escherichia phage slur09												V-292
293		Viruses|dsDNA viruses, no RNA stage|Caudovirales|Siphoviridae|Unclassified|T5virus|Escherichia virus T5												V-293
294		Viruses|dsDNA viruses, no RNA stage|Caudovirales|Siphoviridae|Unclassified|T5virus|Salmonella virus SPC35												V-294
295		Viruses|dsDNA viruses, no RNA stage|Caudovirales|Siphoviridae|Unclassified|Triavirus|Staphylococcus virus 42e												V-295
296		Viruses|dsDNA viruses, no RNA stage|Caudovirales|Siphoviridae|Unclassified|unclassified Spbetalikevirus|Staphylococcus phage SPbeta-like												V-296
297		Viruses|dsDNA viruses, no RNA stage|Caudovirales|Siphoviridae|Unclassified|unclassified T5likevirus|Vibrio phage pVp-1												V-297
298		Viruses|dsDNA viruses, no RNA stage|Caudovirales|Siphoviridae|Unclassified|Unclassified|Bacillus phage BCJA1c												V-298
299		Viruses|dsDNA viruses, no RNA stage|Caudovirales|Siphoviridae|Unclassified|Unclassified|Bacillus phage phIS3501												V-299
300		Viruses|dsDNA viruses, no RNA stage|Caudovirales|Siphoviridae|Unclassified|Unclassified|Bacillus phage vB_BanS-Tsamsa												V-300
301		Viruses|dsDNA viruses, no RNA stage|Caudovirales|Siphoviridae|Unclassified|Unclassified|Bacteroides phage B124-14												V-301
302		Viruses|dsDNA viruses, no RNA stage|Caudovirales|Siphoviridae|Unclassified|Unclassified|Bacteroides phage B40-8												V-302
303		Viruses|dsDNA viruses, no RNA stage|Caudovirales|Siphoviridae|Unclassified|Unclassified|Brochothrix phage NF5												V-303
304		Viruses|dsDNA viruses, no RNA stage|Caudovirales|Siphoviridae|Unclassified|Unclassified|Caulobacter phage CcrColossus												V-304
305		Viruses|dsDNA viruses, no RNA stage|Caudovirales|Siphoviridae|Unclassified|Unclassified|Clostridium phage phiCD111												V-305
306		Viruses|dsDNA viruses, no RNA stage|Caudovirales|Siphoviridae|Unclassified|Unclassified|Clostridium phage phiCD146												V-306
307		Viruses|dsDNA viruses, no RNA stage|Caudovirales|Siphoviridae|Unclassified|Unclassified|Clostridium phage phiCD38-2												V-307
308		Viruses|dsDNA viruses, no RNA stage|Caudovirales|Siphoviridae|Unclassified|Unclassified|Clostridium phage phiCD6356												V-308
309		Viruses|dsDNA viruses, no RNA stage|Caudovirales|Siphoviridae|Unclassified|Unclassified|Clostridium phage phiCP26F												V-309
310		Viruses|dsDNA viruses, no RNA stage|Caudovirales|Siphoviridae|Unclassified|Unclassified|Clostridium phage phiCP39-O												V-310
311		Viruses|dsDNA viruses, no RNA stage|Caudovirales|Siphoviridae|Unclassified|Unclassified|Clostridium phage PhiS63												V-311
312		Viruses|dsDNA viruses, no RNA stage|Caudovirales|Siphoviridae|Unclassified|Unclassified|Clostridium phage phiSM101												V-312
313		Viruses|dsDNA viruses, no RNA stage|Caudovirales|Siphoviridae|Unclassified|Unclassified|Clostridium phage vB_CpeS-CP51												V-313
314		Viruses|dsDNA viruses, no RNA stage|Caudovirales|Siphoviridae|Unclassified|Unclassified|Colwellia phage 9A												V-314
315		Viruses|dsDNA viruses, no RNA stage|Caudovirales|Siphoviridae|Unclassified|Unclassified|Cronobacter phage ENT39118												V-315
316		Viruses|dsDNA viruses, no RNA stage|Caudovirales|Siphoviridae|Unclassified|Unclassified|Cronobacter phage phiES15												V-316
317		Viruses|dsDNA viruses, no RNA stage|Caudovirales|Siphoviridae|Unclassified|Unclassified|Enterobacteria phage BP-4795												V-317
318		Viruses|dsDNA viruses, no RNA stage|Caudovirales|Siphoviridae|Unclassified|Unclassified|Enterobacteria phage cdtI												V-318
319		Viruses|dsDNA viruses, no RNA stage|Caudovirales|Siphoviridae|Unclassified|Unclassified|Enterobacteria phage ES18												V-319
320		Viruses|dsDNA viruses, no RNA stage|Caudovirales|Siphoviridae|Unclassified|Unclassified|Enterobacteria phage HK106												V-320
321		Viruses|dsDNA viruses, no RNA stage|Caudovirales|Siphoviridae|Unclassified|Unclassified|Enterobacteria phage HK140												V-321
322		Viruses|dsDNA viruses, no RNA stage|Caudovirales|Siphoviridae|Unclassified|Unclassified|Enterobacteria phage HK225												V-322
323		Viruses|dsDNA viruses, no RNA stage|Caudovirales|Siphoviridae|Unclassified|Unclassified|Enterobacteria phage HK446												V-323
324		Viruses|dsDNA viruses, no RNA stage|Caudovirales|Siphoviridae|Unclassified|Unclassified|Enterobacteria phage HK542												V-324
325		Viruses|dsDNA viruses, no RNA stage|Caudovirales|Siphoviridae|Unclassified|Unclassified|Enterobacteria phage HK544												V-325
326		Viruses|dsDNA viruses, no RNA stage|Caudovirales|Siphoviridae|Unclassified|Unclassified|Enterobacteria phage HK629												V-326
327		Viruses|dsDNA viruses, no RNA stage|Caudovirales|Siphoviridae|Unclassified|Unclassified|Enterobacteria phage HK630												V-327
328		Viruses|dsDNA viruses, no RNA stage|Caudovirales|Siphoviridae|Unclassified|Unclassified|Enterobacteria phage HK633												V-328
329		Viruses|dsDNA viruses, no RNA stage|Caudovirales|Siphoviridae|Unclassified|Unclassified|Enterobacteria phage mEp043 c-1												V-329
330		Viruses|dsDNA viruses, no RNA stage|Caudovirales|Siphoviridae|Unclassified|Unclassified|Enterobacteria phage mEp235												V-330
331		Viruses|dsDNA viruses, no RNA stage|Caudovirales|Siphoviridae|Unclassified|Unclassified|Enterobacteria phage mEp237												V-331
332		Viruses|dsDNA viruses, no RNA stage|Caudovirales|Siphoviridae|Unclassified|Unclassified|Enterobacteria phage mEp460												V-332
333		Viruses|dsDNA viruses, no RNA stage|Caudovirales|Siphoviridae|Unclassified|Unclassified|Enterobacteria phage mEpX1												V-333
334		Viruses|dsDNA viruses, no RNA stage|Caudovirales|Siphoviridae|Unclassified|Unclassified|Enterobacteria phage mEpX2												V-334
335		Viruses|dsDNA viruses, no RNA stage|Caudovirales|Siphoviridae|Unclassified|Unclassified|Enterobacteria phage phi80												V-335
336		Viruses|dsDNA viruses, no RNA stage|Caudovirales|Siphoviridae|Unclassified|Unclassified|Enterobacteria phage vB_EcoS_NBD2												V-336
337		Viruses|dsDNA viruses, no RNA stage|Caudovirales|Siphoviridae|Unclassified|Unclassified|Enterobacterial phage mEp213												V-337
338		Viruses|dsDNA viruses, no RNA stage|Caudovirales|Siphoviridae|Unclassified|Unclassified|Enterobacterial phage mEp234												V-338
339		Viruses|dsDNA viruses, no RNA stage|Caudovirales|Siphoviridae|Unclassified|Unclassified|Enterobacterial phage mEp390												V-339
340		Viruses|dsDNA viruses, no RNA stage|Caudovirales|Siphoviridae|Unclassified|Unclassified|Enterococcus phage EFAP-1												V-340
341		Viruses|dsDNA viruses, no RNA stage|Caudovirales|Siphoviridae|Unclassified|Unclassified|Enterococcus phage EFC-1												V-341
342		Viruses|dsDNA viruses, no RNA stage|Caudovirales|Siphoviridae|Unclassified|Unclassified|Enterococcus phage IME-EFm1												V-342
343		Viruses|dsDNA viruses, no RNA stage|Caudovirales|Siphoviridae|Unclassified|Unclassified|Enterococcus phage IME-EFm5												V-343
344		Viruses|dsDNA viruses, no RNA stage|Caudovirales|Siphoviridae|Unclassified|Unclassified|Enterococcus phage phiEf11												V-344
345		Viruses|dsDNA viruses, no RNA stage|Caudovirales|Siphoviridae|Unclassified|Unclassified|Enterococcus phage phiFL4A												V-345
346		Viruses|dsDNA viruses, no RNA stage|Caudovirales|Siphoviridae|Unclassified|Unclassified|Enterococcus phage SANTOR1												V-346
347		Viruses|dsDNA viruses, no RNA stage|Caudovirales|Siphoviridae|Unclassified|Unclassified|Enterococcus phage vB_EfaS_IME196												V-347
348		Viruses|dsDNA viruses, no RNA stage|Caudovirales|Siphoviridae|Unclassified|Unclassified|Enterococcus phage vB_EfaS_IME197												V-348
349		Viruses|dsDNA viruses, no RNA stage|Caudovirales|Siphoviridae|Unclassified|Unclassified|Enterococcus phage vB_EfaS_IME198												V-349
350		Viruses|dsDNA viruses, no RNA stage|Caudovirales|Siphoviridae|Unclassified|Unclassified|Erwinia phage phiEaH2												V-350
351		Viruses|dsDNA viruses, no RNA stage|Caudovirales|Siphoviridae|Unclassified|Unclassified|Escherichia phage HK639												V-351
352		Viruses|dsDNA viruses, no RNA stage|Caudovirales|Siphoviridae|Unclassified|Unclassified|Escherichia phage HK75												V-352
353		Viruses|dsDNA viruses, no RNA stage|Caudovirales|Siphoviridae|Unclassified|Unclassified|Gordonia phage Nyceirae												V-353
354		Viruses|dsDNA viruses, no RNA stage|Caudovirales|Siphoviridae|Unclassified|Unclassified|Klebsiella phage phiKO2												V-354
355		Viruses|dsDNA viruses, no RNA stage|Caudovirales|Siphoviridae|Unclassified|Unclassified|Lactobacillus phage A2												V-355
356		Viruses|dsDNA viruses, no RNA stage|Caudovirales|Siphoviridae|Unclassified|Unclassified|Lactobacillus phage CL1												V-356
357		Viruses|dsDNA viruses, no RNA stage|Caudovirales|Siphoviridae|Unclassified|Unclassified|Lactobacillus phage CL2												V-357
358		Viruses|dsDNA viruses, no RNA stage|Caudovirales|Siphoviridae|Unclassified|Unclassified|Lactobacillus phage iA2												V-358
359		Viruses|dsDNA viruses, no RNA stage|Caudovirales|Siphoviridae|Unclassified|Unclassified|Lactobacillus phage iLp1308												V-359
360		Viruses|dsDNA viruses, no RNA stage|Caudovirales|Siphoviridae|Unclassified|Unclassified|Lactobacillus phage iLp84												V-360
361		Viruses|dsDNA viruses, no RNA stage|Caudovirales|Siphoviridae|Unclassified|Unclassified|Lactobacillus phage J-1												V-361
362		Viruses|dsDNA viruses, no RNA stage|Caudovirales|Siphoviridae|Unclassified|Unclassified|Lactobacillus phage JCL1032												V-362
363		Viruses|dsDNA viruses, no RNA stage|Caudovirales|Siphoviridae|Unclassified|Unclassified|Lactobacillus phage Lc-Nu												V-363
364		Viruses|dsDNA viruses, no RNA stage|Caudovirales|Siphoviridae|Unclassified|Unclassified|Lactobacillus phage Ldl1												V-364
365		Viruses|dsDNA viruses, no RNA stage|Caudovirales|Siphoviridae|Unclassified|Unclassified|Lactobacillus phage LF1												V-365
366		Viruses|dsDNA viruses, no RNA stage|Caudovirales|Siphoviridae|Unclassified|Unclassified|Lactobacillus phage LfeSau												V-366
367		Viruses|dsDNA viruses, no RNA stage|Caudovirales|Siphoviridae|Unclassified|Unclassified|Lactobacillus phage Lrm1												V-367
368		Viruses|dsDNA viruses, no RNA stage|Caudovirales|Siphoviridae|Unclassified|Unclassified|Lactobacillus phage Lv-1												V-368
369		Viruses|dsDNA viruses, no RNA stage|Caudovirales|Siphoviridae|Unclassified|Unclassified|Lactobacillus phage phiadh												V-369
370		Viruses|dsDNA viruses, no RNA stage|Caudovirales|Siphoviridae|Unclassified|Unclassified|Lactobacillus phage phiAT3												V-370
371		Viruses|dsDNA viruses, no RNA stage|Caudovirales|Siphoviridae|Unclassified|Unclassified|Lactobacillus phage phig1e												V-371
372		Viruses|dsDNA viruses, no RNA stage|Caudovirales|Siphoviridae|Unclassified|Unclassified|Lactobacillus phage phiJB												V-372
373		Viruses|dsDNA viruses, no RNA stage|Caudovirales|Siphoviridae|Unclassified|Unclassified|Lactobacillus phage phiPYB5												V-373
374		Viruses|dsDNA viruses, no RNA stage|Caudovirales|Siphoviridae|Unclassified|Unclassified|Lactobacillus phage PL-1												V-374
375		Viruses|dsDNA viruses, no RNA stage|Caudovirales|Siphoviridae|Unclassified|Unclassified|Lactobacillus phage PLE2												V-375
376		Viruses|dsDNA viruses, no RNA stage|Caudovirales|Siphoviridae|Unclassified|Unclassified|Lactobacillus phage PLE3												V-376
377		Viruses|dsDNA viruses, no RNA stage|Caudovirales|Siphoviridae|Unclassified|Unclassified|Lactobacillus phage Sha1												V-377
378		Viruses|dsDNA viruses, no RNA stage|Caudovirales|Siphoviridae|Unclassified|Unclassified|Lactobacillus prophage Lj928												V-378
379		Viruses|dsDNA viruses, no RNA stage|Caudovirales|Siphoviridae|Unclassified|Unclassified|Lactobacillus prophage Lj965												V-379
380		Viruses|dsDNA viruses, no RNA stage|Caudovirales|Siphoviridae|Unclassified|Unclassified|Lactococcus phage 28201												V-380
381		Viruses|dsDNA viruses, no RNA stage|Caudovirales|Siphoviridae|Unclassified|Unclassified|Lactococcus phage 340												V-381
382		Viruses|dsDNA viruses, no RNA stage|Caudovirales|Siphoviridae|Unclassified|Unclassified|Lactococcus phage 50101												V-382
383		Viruses|dsDNA viruses, no RNA stage|Caudovirales|Siphoviridae|Unclassified|Unclassified|Lactococcus phage 63301												V-383
384		Viruses|dsDNA viruses, no RNA stage|Caudovirales|Siphoviridae|Unclassified|Unclassified|Lactococcus phage 949												V-384
385		Viruses|dsDNA viruses, no RNA stage|Caudovirales|Siphoviridae|Unclassified|Unclassified|Lactococcus phage 98201												V-385
386		Viruses|dsDNA viruses, no RNA stage|Caudovirales|Siphoviridae|Unclassified|Unclassified|Lactococcus phage bIL285												V-386
387		Viruses|dsDNA viruses, no RNA stage|Caudovirales|Siphoviridae|Unclassified|Unclassified|Lactococcus phage bIL286												V-387
388		Viruses|dsDNA viruses, no RNA stage|Caudovirales|Siphoviridae|Unclassified|Unclassified|Lactococcus phage bIL309												V-388
389		Viruses|dsDNA viruses, no RNA stage|Caudovirales|Siphoviridae|Unclassified|Unclassified|Lactococcus phage bIL310												V-389
390		Viruses|dsDNA viruses, no RNA stage|Caudovirales|Siphoviridae|Unclassified|Unclassified|Lactococcus phage bIL311												V-390
391		Viruses|dsDNA viruses, no RNA stage|Caudovirales|Siphoviridae|Unclassified|Unclassified|Lactococcus phage bIL312												V-391
392		Viruses|dsDNA viruses, no RNA stage|Caudovirales|Siphoviridae|Unclassified|Unclassified|Lactococcus phage BK5-T												V-392
393		Viruses|dsDNA viruses, no RNA stage|Caudovirales|Siphoviridae|Unclassified|Unclassified|Lactococcus phage BM13												V-393
394		Viruses|dsDNA viruses, no RNA stage|Caudovirales|Siphoviridae|Unclassified|Unclassified|Lactococcus phage jm2												V-394
395		Viruses|dsDNA viruses, no RNA stage|Caudovirales|Siphoviridae|Unclassified|Unclassified|Lactococcus phage jm3												V-395
396		Viruses|dsDNA viruses, no RNA stage|Caudovirales|Siphoviridae|Unclassified|Unclassified|Lactococcus phage P087												V-396
397		Viruses|dsDNA viruses, no RNA stage|Caudovirales|Siphoviridae|Unclassified|Unclassified|Lactococcus phage P335 sensu lato												V-397
398		Viruses|dsDNA viruses, no RNA stage|Caudovirales|Siphoviridae|Unclassified|Unclassified|Lactococcus phage P680												V-398
399		Viruses|dsDNA viruses, no RNA stage|Caudovirales|Siphoviridae|Unclassified|Unclassified|Lactococcus phage phi7												V-399
400		Viruses|dsDNA viruses, no RNA stage|Caudovirales|Siphoviridae|Unclassified|Unclassified|Lactococcus phage phiL47												V-400
401		Viruses|dsDNA viruses, no RNA stage|Caudovirales|Siphoviridae|Unclassified|Unclassified|Lactococcus phage phiLC3												V-401
402		Viruses|dsDNA viruses, no RNA stage|Caudovirales|Siphoviridae|Unclassified|Unclassified|Lactococcus phage PLgT-1												V-402
403		Viruses|dsDNA viruses, no RNA stage|Caudovirales|Siphoviridae|Unclassified|Unclassified|Lactococcus phage r1t												V-403
404		Viruses|dsDNA viruses, no RNA stage|Caudovirales|Siphoviridae|Unclassified|Unclassified|Lactococcus phage TP901-1												V-404
405		Viruses|dsDNA viruses, no RNA stage|Caudovirales|Siphoviridae|Unclassified|Unclassified|Lactococcus phage Tuc2009												V-405
406		Viruses|dsDNA viruses, no RNA stage|Caudovirales|Siphoviridae|Unclassified|Unclassified|Lactococcus phage ul36												V-406
407		Viruses|dsDNA viruses, no RNA stage|Caudovirales|Siphoviridae|Unclassified|Unclassified|Lactococcus phage WRP3												V-407
408		Viruses|dsDNA viruses, no RNA stage|Caudovirales|Siphoviridae|Unclassified|Unclassified|Leuconostoc phage 1-A4												V-408
409		Viruses|dsDNA viruses, no RNA stage|Caudovirales|Siphoviridae|Unclassified|Unclassified|Leuconostoc phage phiLN34												V-409
410		Viruses|dsDNA viruses, no RNA stage|Caudovirales|Siphoviridae|Unclassified|Unclassified|Leuconostoc phage phiLNTR2												V-410
411		Viruses|dsDNA viruses, no RNA stage|Caudovirales|Siphoviridae|Unclassified|Unclassified|Leuconostoc phage phiLNTR3												V-411
412		Viruses|dsDNA viruses, no RNA stage|Caudovirales|Siphoviridae|Unclassified|Unclassified|Listeria phage vB_LmoS_188												V-412
413		Viruses|dsDNA viruses, no RNA stage|Caudovirales|Siphoviridae|Unclassified|Unclassified|Mannheimia phage vB_MhS_587AP2												V-413
414		Viruses|dsDNA viruses, no RNA stage|Caudovirales|Siphoviridae|Unclassified|Unclassified|Microbacterium phage Min1												V-414
415		Viruses|dsDNA viruses, no RNA stage|Caudovirales|Siphoviridae|Unclassified|Unclassified|Mycobacterium phage Brocalys												V-415
416		Viruses|dsDNA viruses, no RNA stage|Caudovirales|Siphoviridae|Unclassified|Unclassified|Mycobacterium phage BTCU-1												V-416
417		Viruses|dsDNA viruses, no RNA stage|Caudovirales|Siphoviridae|Unclassified|Unclassified|Mycobacterium phage BuzzLyseyear												V-417
418		Viruses|dsDNA viruses, no RNA stage|Caudovirales|Siphoviridae|Unclassified|Unclassified|Mycobacterium phage Crossroads												V-418
419		Viruses|dsDNA viruses, no RNA stage|Caudovirales|Siphoviridae|Unclassified|Unclassified|Mycobacterium phage Lolly9												V-419
420		Viruses|dsDNA viruses, no RNA stage|Caudovirales|Siphoviridae|Unclassified|Unclassified|Mycobacterium phage PegLeg												V-420
421		Viruses|dsDNA viruses, no RNA stage|Caudovirales|Siphoviridae|Unclassified|Unclassified|Mycobacterium phage SiSi												V-421
422		Viruses|dsDNA viruses, no RNA stage|Caudovirales|Siphoviridae|Unclassified|Unclassified|Mycobacterium phage Snenia												V-422
423		Viruses|dsDNA viruses, no RNA stage|Caudovirales|Siphoviridae|Unclassified|Unclassified|Mycobacterium phage Whirlwind												V-423
424		Viruses|dsDNA viruses, no RNA stage|Caudovirales|Siphoviridae|Unclassified|Unclassified|Mycobacterium phage XFactor												V-424
425		Viruses|dsDNA viruses, no RNA stage|Caudovirales|Siphoviridae|Unclassified|Unclassified|Paenibacillus phage Xenia												V-425
426		Viruses|dsDNA viruses, no RNA stage|Caudovirales|Siphoviridae|Unclassified|Unclassified|Pectobacterium phage My1												V-426
427		Viruses|dsDNA viruses, no RNA stage|Caudovirales|Siphoviridae|Unclassified|Unclassified|Pseudomonas phage JBD44												V-427
428		Viruses|dsDNA viruses, no RNA stage|Caudovirales|Siphoviridae|Unclassified|Unclassified|Pseudomonas phage PaMx42												V-428
429		Viruses|dsDNA viruses, no RNA stage|Caudovirales|Siphoviridae|Unclassified|Unclassified|Pseudomonas phage phi297												V-429
430		Viruses|dsDNA viruses, no RNA stage|Caudovirales|Siphoviridae|Unclassified|Unclassified|Pseudomonas phage PS-1												V-430
431		Viruses|dsDNA viruses, no RNA stage|Caudovirales|Siphoviridae|Unclassified|Unclassified|Pseudomonas phage YMC11/07/P54_PAE_BP												V-431
432		Viruses|dsDNA viruses, no RNA stage|Caudovirales|Siphoviridae|Unclassified|Unclassified|Salmonella phage 36												V-432
433		Viruses|dsDNA viruses, no RNA stage|Caudovirales|Siphoviridae|Unclassified|Unclassified|Salmonella phage BPS11Q3												V-433
434		Viruses|dsDNA viruses, no RNA stage|Caudovirales|Siphoviridae|Unclassified|Unclassified|Salmonella phage IME207												V-434
435		Viruses|dsDNA viruses, no RNA stage|Caudovirales|Siphoviridae|Unclassified|Unclassified|Salmonella phage MA12												V-435
436		Viruses|dsDNA viruses, no RNA stage|Caudovirales|Siphoviridae|Unclassified|Unclassified|Salmonella phage phSE-2												V-436
437		Viruses|dsDNA viruses, no RNA stage|Caudovirales|Siphoviridae|Unclassified|Unclassified|Salmonella phage SETP7												V-437
438		Viruses|dsDNA viruses, no RNA stage|Caudovirales|Siphoviridae|Unclassified|Unclassified|Salmonella phage SPN3UB												V-438
439		Viruses|dsDNA viruses, no RNA stage|Caudovirales|Siphoviridae|Unclassified|Unclassified|Salmonella phage SSU5												V-439
440		Viruses|dsDNA viruses, no RNA stage|Caudovirales|Siphoviridae|Unclassified|Unclassified|Salmonella phage vB_SenS-Ent2												V-440
441		Viruses|dsDNA viruses, no RNA stage|Caudovirales|Siphoviridae|Unclassified|Unclassified|Salmonella phage vB_SenS-Ent3												V-441
442		Viruses|dsDNA viruses, no RNA stage|Caudovirales|Siphoviridae|Unclassified|Unclassified|Salmonella phage vB_SosS_Oslo												V-442
443		Viruses|dsDNA viruses, no RNA stage|Caudovirales|Siphoviridae|Unclassified|Unclassified|Salmonella phage Vi II-E1												V-443
444		Viruses|dsDNA viruses, no RNA stage|Caudovirales|Siphoviridae|Unclassified|Unclassified|Shigella phage pSf-1												V-444
445		Viruses|dsDNA viruses, no RNA stage|Caudovirales|Siphoviridae|Unclassified|Unclassified|Sinorhizobium phage phiLM21												V-445
446		Viruses|dsDNA viruses, no RNA stage|Caudovirales|Siphoviridae|Unclassified|Unclassified|Staphylococcus phage StB20												V-446
447		Viruses|dsDNA viruses, no RNA stage|Caudovirales|Siphoviridae|Unclassified|Unclassified|Staphylococcus phage StB20-like												V-447
448		Viruses|dsDNA viruses, no RNA stage|Caudovirales|Siphoviridae|Unclassified|Unclassified|Streptococcus phage 5093												V-448
449		Viruses|dsDNA viruses, no RNA stage|Caudovirales|Siphoviridae|Unclassified|Unclassified|Streptococcus phage Dp-1												V-449
450		Viruses|dsDNA viruses, no RNA stage|Caudovirales|Siphoviridae|Unclassified|Unclassified|Streptococcus phage MM1												V-450
451		Viruses|dsDNA viruses, no RNA stage|Caudovirales|Siphoviridae|Unclassified|Unclassified|Streptococcus phage PH10												V-451
452		Viruses|dsDNA viruses, no RNA stage|Caudovirales|Siphoviridae|Unclassified|Unclassified|Streptococcus phage PH15												V-452
453		Viruses|dsDNA viruses, no RNA stage|Caudovirales|Siphoviridae|Unclassified|Unclassified|Streptococcus phage phiARI0468-4												V-453
454		Viruses|dsDNA viruses, no RNA stage|Caudovirales|Siphoviridae|Unclassified|Unclassified|Streptococcus phage phiARI0746												V-454
455		Viruses|dsDNA viruses, no RNA stage|Caudovirales|Siphoviridae|Unclassified|Unclassified|Streptococcus phage phiARI0923												V-455
456		Viruses|dsDNA viruses, no RNA stage|Caudovirales|Siphoviridae|Unclassified|Unclassified|Streptococcus phage SM1												V-456
457		Viruses|dsDNA viruses, no RNA stage|Caudovirales|Siphoviridae|Unclassified|Unclassified|Streptococcus phage SMP												V-457
458		Viruses|dsDNA viruses, no RNA stage|Caudovirales|Siphoviridae|Unclassified|Unclassified|Streptococcus phage SpSL1												V-458
459		Viruses|dsDNA viruses, no RNA stage|Caudovirales|Siphoviridae|Unclassified|Unclassified|Streptococcus phage TP-778L												V-459
460		Viruses|dsDNA viruses, no RNA stage|Caudovirales|Siphoviridae|Unclassified|Unclassified|Streptococcus phage TP-J34												V-460
461		Viruses|dsDNA viruses, no RNA stage|Caudovirales|Siphoviridae|Unclassified|Unclassified|Streptococcus phage YMC-2011												V-461
462		Viruses|dsDNA viruses, no RNA stage|Caudovirales|Siphoviridae|Unclassified|Unclassified|Streptococcus virus 9871												V-462
463		Viruses|dsDNA viruses, no RNA stage|Caudovirales|Siphoviridae|Unclassified|Unclassified|Streptococcus virus 9872												V-463
464		Viruses|dsDNA viruses, no RNA stage|Caudovirales|Siphoviridae|Unclassified|Unclassified|Streptococcus virus 9874												V-464
465		Viruses|dsDNA viruses, no RNA stage|Caudovirales|Siphoviridae|Unclassified|Unclassified|Streptomyces phage Zemlya												V-465
466		Viruses|dsDNA viruses, no RNA stage|Caudovirales|Siphoviridae|Unclassified|Unclassified|Stx2-converting phage 1717												V-466
467		Viruses|dsDNA viruses, no RNA stage|Caudovirales|Siphoviridae|Unclassified|Unclassified|Synechococcus phage S-SKS1												V-467
468		Viruses|dsDNA viruses, no RNA stage|Caudovirales|Siphoviridae|Unclassified|Unclassified|Temperate phage phiNIH1.1												V-468
469		Viruses|dsDNA viruses, no RNA stage|Caudovirales|Siphoviridae|Unclassified|Vegasvirus|Paenibacillus phage Vegas												V-469
470		Viruses|dsDNA viruses, no RNA stage|Caudovirales|Siphoviridae|Unclassified|Vendettavirus|Gordonia phage Vendetta												V-470
471		Viruses|dsDNA viruses, no RNA stage|Caudovirales|Unclassified|Unclassified|Unclassified|Prochlorococcus phage Syn1												V-471
472		Viruses|dsDNA viruses, no RNA stage|Caudovirales|Unclassified|Unclassified|Unclassified|Salmonella phage ST64B												V-472
473		Viruses|dsDNA viruses, no RNA stage|Herpesvirales|Alloherpesviridae|Unclassified|Ictalurivirus|Ictalurid herpesvirus 1												V-473
474		Viruses|dsDNA viruses, no RNA stage|Herpesvirales|Herpesviridae|Betaherpesvirinae|Cytomegalovirus|Cercopithecine betaherpesvirus 5												V-474
475		Viruses|dsDNA viruses, no RNA stage|Herpesvirales|Herpesviridae|Gammaherpesvirinae|Macavirus|Ovine gammaherpesvirus 2												V-475
476		Viruses|dsDNA viruses, no RNA stage|Herpesvirales|Herpesviridae|Gammaherpesvirinae|Unclassified|Felis catus gammaherpesvirus 1												V-476
477		Viruses|dsDNA viruses, no RNA stage|unclassified dsDNA viruses|Unclassified|Unclassified|Unclassified|Apis mellifera filamentous virus												V-477
478		Viruses|dsDNA viruses, no RNA stage|unclassified dsDNA viruses|Unclassified|Unclassified|Unclassified|Micromonas pusilla virus 12T												V-478
479		Viruses|dsDNA viruses, no RNA stage|unclassified dsDNA viruses|Unclassified|Unclassified|Unclassified|Pandoravirus dulcis												V-479
480		Viruses|dsDNA viruses, no RNA stage|unclassified dsDNA viruses|Unclassified|Unclassified|Unclassified|Pandoravirus salinus												V-480
481		Viruses|dsDNA viruses, no RNA stage|Unclassified|Adenoviridae|Unclassified|Bat mastadenovirus B|Bat adenovirus 2												V-481
482		Viruses|dsDNA viruses, no RNA stage|Unclassified|Adenoviridae|Unclassified|Bovine mastadenovirus B|Bovine adenovirus 3												V-482
483		Viruses|dsDNA viruses, no RNA stage|Unclassified|Adenoviridae|Unclassified|Human mastadenovirus B|Human adenovirus 35												V-483
484		Viruses|dsDNA viruses, no RNA stage|Unclassified|Adenoviridae|Unclassified|Mastadenovirus|Bat mastadenovirus WIV9												V-484
485		Viruses|dsDNA viruses, no RNA stage|Unclassified|Adenoviridae|Unclassified|Mastadenovirus|Bovine mastadenovirus B												V-485
486		Viruses|dsDNA viruses, no RNA stage|Unclassified|Adenoviridae|Unclassified|Mastadenovirus|Human adenovirus 1												V-486
487		Viruses|dsDNA viruses, no RNA stage|Unclassified|Adenoviridae|Unclassified|Mastadenovirus|Human mastadenovirus A												V-487
488		Viruses|dsDNA viruses, no RNA stage|Unclassified|Adenoviridae|Unclassified|Mastadenovirus|Human mastadenovirus B												V-488
489		Viruses|dsDNA viruses, no RNA stage|Unclassified|Adenoviridae|Unclassified|Mastadenovirus|Human mastadenovirus F												V-489
490		Viruses|dsDNA viruses, no RNA stage|Unclassified|Adenoviridae|Unclassified|Mastadenovirus|Simian adenovirus 1												V-490
491		Viruses|dsDNA viruses, no RNA stage|Unclassified|Adenoviridae|Unclassified|Mastadenovirus|Simian adenovirus 13												V-491
492		Viruses|dsDNA viruses, no RNA stage|Unclassified|Adenoviridae|Unclassified|Mastadenovirus|Simian adenovirus 16												V-492
493		Viruses|dsDNA viruses, no RNA stage|Unclassified|Adenoviridae|Unclassified|Mastadenovirus|Simian adenovirus 19												V-493
494		Viruses|dsDNA viruses, no RNA stage|Unclassified|Adenoviridae|Unclassified|Mastadenovirus|Simian adenovirus 3												V-494
495		Viruses|dsDNA viruses, no RNA stage|Unclassified|Adenoviridae|Unclassified|Mastadenovirus|Simian adenovirus 8												V-495
496		Viruses|dsDNA viruses, no RNA stage|Unclassified|Adenoviridae|Unclassified|Mastadenovirus|Simian adenovirus C												V-496
497		Viruses|dsDNA viruses, no RNA stage|Unclassified|Adenoviridae|Unclassified|Mastadenovirus|Simian adenovirus DM-2014												V-497
498		Viruses|dsDNA viruses, no RNA stage|Unclassified|Adenoviridae|Unclassified|Mastadenovirus|Simian mastadenovirus WIV19												V-498
499		Viruses|dsDNA viruses, no RNA stage|Unclassified|Ampullaviridae|Unclassified|Ampullavirus|Acidianus bottle-shaped virus												V-499
500		Viruses|dsDNA viruses, no RNA stage|Unclassified|Baculoviridae|Unclassified|Alphabaculovirus|Hyphantria cunea nucleopolyhedrovirus												V-500
501		Viruses|dsDNA viruses, no RNA stage|Unclassified|Baculoviridae|Unclassified|unclassified Betabaculovirus|Choristoneura occidentalis granulovirus												V-501
502		Viruses|dsDNA viruses, no RNA stage|Unclassified|Mimiviridae|Unclassified|Cafeteriavirus|Cafeteria roenbergensis virus BV-PW1												V-502
503		Viruses|dsDNA viruses, no RNA stage|Unclassified|Mimiviridae|Unclassified|Mimivirus|Acanthamoeba polyphaga mimivirus												V-503
504		Viruses|dsDNA viruses, no RNA stage|Unclassified|Nimaviridae|Unclassified|Whispovirus|White spot syndrome virus												V-504
505		Viruses|dsDNA viruses, no RNA stage|Unclassified|Nudiviridae|Unclassified|Betanudivirus|Helicoverpa zea nudivirus 2												V-505
506		Viruses|dsDNA viruses, no RNA stage|Unclassified|Phycodnaviridae|Unclassified|Chlorovirus|Acanthocystis turfacea Chlorella virus 1												V-506
507		Viruses|dsDNA viruses, no RNA stage|Unclassified|Phycodnaviridae|Unclassified|Chlorovirus|Paramecium bursaria Chlorella virus 1												V-507
508		Viruses|dsDNA viruses, no RNA stage|Unclassified|Phycodnaviridae|Unclassified|Coccolithovirus|Emiliania huxleyi virus 86												V-508
509		Viruses|dsDNA viruses, no RNA stage|Unclassified|Phycodnaviridae|Unclassified|Phaeovirus|Ectocarpus siliculosus virus 1												V-509
510		Viruses|dsDNA viruses, no RNA stage|Unclassified|Phycodnaviridae|Unclassified|unclassified Chlorovirus|Only Syngen Nebraska virus 5												V-510
511		Viruses|dsDNA viruses, no RNA stage|Unclassified|Phycodnaviridae|Unclassified|unclassified Prasinovirus|Bathycoccus sp. RCC1105 virus BpV1												V-511
512		Viruses|dsDNA viruses, no RNA stage|Unclassified|Phycodnaviridae|Unclassified|unclassified Prymnesiovirus|Phaeocystis globosa virus virophage												V-512
513		Viruses|dsDNA viruses, no RNA stage|Unclassified|Polydnaviridae|Unclassified|Bracovirus|Cotesia congregata bracovirus												V-513
514		Viruses|dsDNA viruses, no RNA stage|Unclassified|Polydnaviridae|Unclassified|Ichnovirus|Glypta fumiferanae ichnovirus												V-514
515		Viruses|dsDNA viruses, no RNA stage|Unclassified|Polydnaviridae|Unclassified|Ichnovirus|Hyposoter fugitivus ichnovirus												V-515
516		Viruses|dsDNA viruses, no RNA stage|Unclassified|Poxviridae|Chordopoxvirinae|Orthopoxvirus|Monkeypox virus Zaire-96-I-16												V-516
517		Viruses|dsDNA viruses, no RNA stage|Unclassified|Poxviridae|Chordopoxvirinae|Orthopoxvirus|Taterapox virus												V-517
518		Viruses|dsDNA viruses, no RNA stage|Unclassified|Poxviridae|Entomopoxvirinae|Betaentomopoxvirus|Choristoneura biennis entomopoxvirus												V-518
519		Viruses|dsDNA viruses, no RNA stage|Unclassified|Poxviridae|Entomopoxvirinae|Unclassified|Melanoplus sanguinipes entomopoxvirus												V-519
520		Viruses|dsDNA viruses, no RNA stage|Unclassified|Poxviridae|unclassified Chordopoxvirinae|Unclassified|BeAn 58058 virus												V-520
521		Viruses|dsDNA viruses, no RNA stage|Unclassified|Poxviridae|unclassified Chordopoxvirinae|Unclassified|Pteropox virus												V-521
522		Viruses|dsDNA viruses, no RNA stage|Unclassified|Poxviridae|unclassified Chordopoxvirinae|Unclassified|Squirrelpox virus Berlin_2015												V-522
523		Viruses|dsDNA viruses, no RNA stage|Unclassified|unclassified Marseilleviridae|Unclassified|Unclassified|Tokyovirus A1												V-523
524		Viruses|dsDNA viruses, no RNA stage|Unclassified|unclassified Mimiviridae|Unclassified|Unclassified|Acanthamoeba polyphaga moumouvirus												V-524
525		Viruses|dsDNA viruses, no RNA stage|Unclassified|unclassified Mimiviridae|Unclassified|Unclassified|Megavirus chiliensis												V-525
526		Viruses|dsDNA viruses, no RNA stage|Unclassified|unclassified Phycodnaviridae|Unclassified|Unclassified|Aureococcus anophagefferens virus												V-526
527		Viruses|dsDNA viruses, no RNA stage|Unclassified|unclassified Phycodnaviridae|Unclassified|Unclassified|Chrysochromulina ericina virus												V-527
528		Viruses|dsDNA viruses, no RNA stage|Unclassified|Unclassified|Unclassified|Unclassified|Clostridium phage phiCT453A												V-528
529		Viruses|dsDNA viruses, no RNA stage|Unclassified|Unclassified|Unclassified|Unclassified|Clostridium phage phiCT9441A												V-529
530		Viruses|dsDNA viruses, no RNA stage|Unclassified|Unclassified|Unclassified|Unclassified|Cyanophage Syn30												V-530
531		Viruses|dsDNA viruses, no RNA stage|Unclassified|Unclassified|Unclassified|Unclassified|Oenococcus phage phi9805												V-531
532		Viruses|dsDNA viruses, no RNA stage|Unclassified|Unclassified|Unclassified|Unclassified|Oenococcus phage phiS11												V-532
533		Viruses|dsDNA viruses, no RNA stage|Unclassified|Unclassified|Unclassified|Unclassified|Oenococcus phage phiS13												V-533
534		Viruses|dsDNA viruses, no RNA stage|Unclassified|Unclassified|Unclassified|Unclassified|Pseudomonas phage vB_PaeP_Tr60_Ab31												V-534
535		Viruses|dsDNA viruses, no RNA stage|Unclassified|Unclassified|Unclassified|Unclassified|Synechococcus phage S-CBP2												V-535
536		Viruses|dsDNA viruses, no RNA stage|Unclassified|Unclassified|Unclassified|Unclassified|Vibrio phage pYD38-A												V-536
537		Viruses|Retro-transcribing viruses|Unclassified|Retroviridae|Orthoretrovirinae|Betaretrovirus|Jaagsiekte sheep retrovirus												V-537
538		Viruses|Retro-transcribing viruses|Unclassified|Retroviridae|Orthoretrovirinae|Gammaretrovirus|Porcine endogenous retrovirus E												V-538
539		Viruses|ssDNA viruses|Unclassified|Inoviridae|Unclassified|Inovirus|Escherichia virus M13												V-539
540		Viruses|ssDNA viruses|Unclassified|Inoviridae|Unclassified|Unclassified|Uncultured phage WW-nAnB strain 3												V-540
541		Viruses|ssDNA viruses|Unclassified|unassigned Inoviridae|Unclassified|Unclassified|Enterobacteria phage If1												V-541
542		Viruses|ssDNA viruses|Unclassified|unclassified Microviridae|Unclassified|Unclassified|Parabacteroides phage YZ-2015a												V-542
543		Viruses|ssDNA viruses|Unclassified|unclassified Microviridae|Unclassified|Unclassified|Parabacteroides phage YZ-2015b												V-543
544		Viruses|ssRNA viruses|Picornavirales|Picornaviridae|Unclassified|Cardiovirus|Encephalomyocarditis virus												V-544
545		Viruses|ssRNA viruses|Unclassified|Astroviridae|Unclassified|unclassified Mamastrovirus|Qinghai Himalayan marmot astrovirus 1												V-545
546		Viruses|ssRNA viruses|Unclassified|Bromoviridae|Unclassified|Cucumovirus|Tomato aspermy virus												V-546
547		Viruses|unclassified bacterial viruses|Unclassified|Unclassified|Unclassified|Unclassified|Enterobacteria phage YYZ-2008												V-547
548		Viruses|unclassified bacterial viruses|Unclassified|Unclassified|Unclassified|Unclassified|Enterococcus phage EF62phi												V-548
549		Viruses|unclassified bacterial viruses|Unclassified|Unclassified|Unclassified|Unclassified|Erwinia phage vB_EamM_Caitlin												V-549
550		Viruses|unclassified bacterial viruses|Unclassified|Unclassified|Unclassified|Unclassified|Flavobacterium phage Fpv2												V-550
551		Viruses|unclassified bacterial viruses|Unclassified|Unclassified|Unclassified|Unclassified|Flavobacterium phage Fpv20												V-551
552		Viruses|unclassified bacterial viruses|Unclassified|Unclassified|Unclassified|Unclassified|Lactobacillus prophage Lj771												V-552
553		Viruses|unclassified bacterial viruses|Unclassified|Unclassified|Unclassified|Unclassified|Propionibacterium phage PFR2												V-553
554		Viruses|unclassified bacterial viruses|Unclassified|Unclassified|Unclassified|Unclassified|Rhodococcus phage REQ3												V-554
555		Viruses|unclassified bacterial viruses|Unclassified|Unclassified|Unclassified|Unclassified|Salmonella phage 118970_sal3												V-555
556		Viruses|unclassified bacterial viruses|Unclassified|Unclassified|Unclassified|Unclassified|Streptococcus phage 20617												V-556
557		Viruses|unclassified bacterial viruses|Unclassified|Unclassified|Unclassified|Unclassified|Streptococcus phage DCC1738												V-557
558		Viruses|unclassified bacterial viruses|Unclassified|Unclassified|Unclassified|Unclassified|Streptococcus phage K13												V-558
559		Viruses|unclassified bacterial viruses|Unclassified|Unclassified|Unclassified|Unclassified|Streptococcus phage phiARI0004												V-559
560		Viruses|unclassified bacterial viruses|Unclassified|Unclassified|Unclassified|Unclassified|Streptococcus phage phiARI0131-1												V-560
561		Viruses|unclassified bacterial viruses|Unclassified|Unclassified|Unclassified|Unclassified|Streptococcus phage phiARI0131-2												V-561
562		Viruses|unclassified bacterial viruses|Unclassified|Unclassified|Unclassified|Unclassified|Streptococcus phage phiARI0462												V-562
563		Viruses|unclassified bacterial viruses|Unclassified|Unclassified|Unclassified|Unclassified|Streptococcus phage phiARI0468-2												V-563
564		Viruses|unclassified bacterial viruses|Unclassified|Unclassified|Unclassified|Unclassified|Streptococcus phage phiBHN167												V-564
565		Viruses|unclassified bacterial viruses|Unclassified|Unclassified|Unclassified|Unclassified|Synechococcus phage S-CAM3												V-565
566		Viruses|unclassified bacterial viruses|Unclassified|Unclassified|Unclassified|Unclassified|Synechococcus phage S-CAM9												V-566
567		Viruses|unclassified bacterial viruses|Unclassified|Unclassified|Unclassified|Unclassified|uncultured crAssphage												V-567
568		Viruses|unclassified viruses|Unclassified|Unclassified|Unclassified|Unclassified|Human smacovirus 1												V-568
569		Viruses|Virus families not assigned to an order|Unclassified|Sphaerolipoviridae|Unclassified|Gammasphaerolipovirus|Thermus virus P23-77												V-569
VIRUS-family-type
1		Viruses|dsDNA viruses, no RNA stage|Caudovirales|Myoviridae|Peduovirinae
2		Viruses|dsDNA viruses, no RNA stage|Caudovirales|Myoviridae|Spounavirinae
3		Viruses|dsDNA viruses, no RNA stage|Caudovirales|Myoviridae|Tevenvirinae
4		Viruses|dsDNA viruses, no RNA stage|Caudovirales|Myoviridae|Unclassified
5		Viruses|dsDNA viruses, no RNA stage|Caudovirales|Myoviridae|unclassified Spounavirinae
6		Viruses|dsDNA viruses, no RNA stage|Caudovirales|Podoviridae|Autographivirinae
7		Viruses|dsDNA viruses, no RNA stage|Caudovirales|Podoviridae|Sepvirinae
8		Viruses|dsDNA viruses, no RNA stage|Caudovirales|Podoviridae|Unclassified
9		Viruses|dsDNA viruses, no RNA stage|Caudovirales|Podoviridae|unclassified Autographivirinae
10		Viruses|dsDNA viruses, no RNA stage|Caudovirales|Siphoviridae|Guernseyvirinae
11		Viruses|dsDNA viruses, no RNA stage|Caudovirales|Siphoviridae|Tunavirinae
12		Viruses|dsDNA viruses, no RNA stage|Caudovirales|Siphoviridae|Unclassified
13		Viruses|dsDNA viruses, no RNA stage|Caudovirales|Unclassified|Unclassified
14		Viruses|dsDNA viruses, no RNA stage|Herpesvirales|Alloherpesviridae|Unclassified
15		Viruses|dsDNA viruses, no RNA stage|Herpesvirales|Herpesviridae|Betaherpesvirinae
16		Viruses|dsDNA viruses, no RNA stage|Herpesvirales|Herpesviridae|Gammaherpesvirinae
17		Viruses|dsDNA viruses, no RNA stage|unclassified dsDNA viruses|Unclassified|Unclassified
18		Viruses|dsDNA viruses, no RNA stage|Unclassified|Adenoviridae|Unclassified
19		Viruses|dsDNA viruses, no RNA stage|Unclassified|Ampullaviridae|Unclassified
20		Viruses|dsDNA viruses, no RNA stage|Unclassified|Baculoviridae|Unclassified
21		Viruses|dsDNA viruses, no RNA stage|Unclassified|Mimiviridae|Unclassified
22		Viruses|dsDNA viruses, no RNA stage|Unclassified|Nimaviridae|Unclassified
23		Viruses|dsDNA viruses, no RNA stage|Unclassified|Phycodnaviridae|Unclassified
24		Viruses|dsDNA viruses, no RNA stage|Unclassified|Polydnaviridae|Unclassified
25		Viruses|dsDNA viruses, no RNA stage|Unclassified|Poxviridae|Chordopoxvirinae
26		Viruses|dsDNA viruses, no RNA stage|Unclassified|Poxviridae|Entomopoxvirinae
27		Viruses|dsDNA viruses, no RNA stage|Unclassified|Poxviridae|unclassified Chordopoxvirinae
28		Viruses|dsDNA viruses, no RNA stage|Unclassified|unclassified Marseilleviridae|Unclassified
29		Viruses|dsDNA viruses, no RNA stage|Unclassified|unclassified Mimiviridae|Unclassified
30		Viruses|dsDNA viruses, no RNA stage|Unclassified|unclassified Phycodnaviridae|Unclassified
31		Viruses|dsDNA viruses, no RNA stage|Unclassified|Unclassified|Unclassified
32		Viruses|ssDNA viruses|Unclassified|Inoviridae|Unclassified
33		Viruses|ssDNA viruses|Unclassified|unassigned Inoviridae|Unclassified
34		Viruses|ssDNA viruses|Unclassified|unclassified Microviridae|Unclassified
35		Viruses|ssRNA viruses|Picornavirales|Picornaviridae|Unclassified
36		Viruses|ssRNA viruses|Unclassified|Bromoviridae|Unclassified
37		Viruses|unclassified bacterial viruses|Unclassified|Unclassified|Unclassified
38		Viruses|unclassified viruses|Unclassified|Unclassified|Unclassified
39		Viruses|Virus families not assigned to an order|Unclassified|Sphaerolipoviridae|Unclassified
40		Viruses|dsDNA viruses, no RNA stage|Caudovirales|Myoviridae|Ounavirinae
41		Viruses|ssRNA viruses|Unclassified|Astroviridae|Unclassified
42		Viruses|dsDNA viruses, no RNA stage|Caudovirales|Myoviridae|unassigned Spounavirinae
43		Viruses|dsDNA viruses, no RNA stage|Caudovirales|Podoviridae|Picovirinae
44		Viruses|dsDNA viruses, no RNA stage|Caudovirales|Podoviridae|unassigned Picovirinae
45		Viruses|dsDNA viruses, no RNA stage|Unclassified|Nudiviridae|Unclassified
46		Viruses|Retro-transcribing viruses|Unclassified|Retroviridae|Orthoretrovirinae
FUNGI (Strain)
1		Fungi |Microsporidia | Chytridiopsida | Enterocytozoonidae | Enterocytozoon | Enterocytozoon bieneusi|Enterocytozoon bieneusi H348													F-1
2		Fungi|Dikarya|Ascomycota|Saccharomycetes|Saccharomycetales|Phaffomycetaceae|Wickerhamomyces |Wickerhamomyces ciferrii													F-2
3		Fungi |Ascomycota|Saccharomycetes|Saccharomycetales|Saccharomycetaceae|Cyberlindnera|C. jadinii|Cyberlindnera jadinii NRRL Y-1542													F-3
4		Ascomycota|Saccharomycetes|Saccharomycetales|Saccharomycetaceae|Saccharomyces|Saccharomyces cerevisiae|Saccharomyces cerevisiae S28													F-4
5		Eukaryota|Ascomycota|Sordariomycetes|Ophiostomatales|Ophiostomataceae|Grosmannia|Grosmannia clavigera|Grosmannia clavigera kw1407													F-5
6		Eukaryota|Basidiomycota|Ustilaginomycetes|Ustilaginales|Ustilaginaceae|Moesziomyces|Moesziomyces antarcticus|Unclassified													F-6
7		Eukaryota|Ascomycota|Eurotiomycetes|Eurotiales|Aspergillaceae|Aspergillus|Aspergillus flavus|Aspergillus flavus NRRL3357													F-7
8		Eukaryota|Ascomycota|Eurotiomycetes|Eurotiales|Aspergillaceae|Aspergillus|Aspergillus niger|Aspergillus niger CBS 513.88													F-8
9		Eukaryota|Basidiomycota|Malasseziomycetes|Malasseziales|Malasseziaceae|Malassezia|Malassezia globosa|Malassezia globosa CBS 7966													F-9
10		Eukaryota|Ascomycota|Eurotiomycetes|Eurotiales|Trichocomaceae|Talaromyces|Talaromyces stipitatus|Talaromyces stipitatus ATCC 10500													F-10
11		Eukaryota|Ascomycota|Saccharomycetes|Saccharomycetales|Metschnikowiaceae|Clavispora|Candida clade|[Candida] auris|Unclassified													F-11
12		Eukaryota|Ascomycota|Sordariomycetes|Sordariales|Sordariaceae|Sordaria|Sordaria macrospora|Sordaria macrospora k-hell													F-12
13		Eukaryota|Ascomycota|Orbiliomycetes|Orbiliales|Orbiliaceae|Arthrobotrys|Arthrobotrys oligospora|Arthrobotrys oligospora ATCC 24927													F-13
14		Eukaryota| Basidiomycota|Agaricomycotina| Agaricomycetes| Agaricomycetidae|Agaricales|Tricholomataceae| Omphalina													F-14

## Sheet: Table S9_MAX-Bacteria
Table S9:	Mean abundance sorting for diagnosis the most prevalent bacterial species in the groups.							Group :	CDM				Group :	CDF					Group :	NONF		Group :		NONM			Group :	UCM			Group :	UCF
								S O R T I N G					S O R T I N G						S O R T I N G				S O R T I N G				S O R T I N G				S O R T I N G
								Bacteria-type		TAXA	Percentage		Bacteria-type		TAXA	Percentage			Bacteria-type	TAXA	Percentage		Bacteria-type	TAXA	Percentage		Bacteria-type	TAXA	Percentage		Bacteria-type	TAXA	Percentage
Bacteria-types with		MAX.	frequency average percentage					B-394	c__Bacteroidiao__Bacteroidalesf__Bacteroidaceaeg__Bacteroidess__Bacteroides_uniformis		8.61788		B-247	c__Clostridiao__Clostridialesf__Ruminococcaceaeg__Faecalibacteriums__Faecalibacterium_prausnitzii		10.1201			B-247	c__Clostridiao__Clostridialesf__Ruminococcaceaeg__Faecalibacteriums__Faecalibacterium_prausnitzii	13.5947		B-247	c__Clostridiao__Clostridialesf__Ruminococcaceaeg__Faecalibacteriums__Faecalibacterium_prausnitzii	10.6477		B-81	c__Bacteroidiao__Bacteroidalesf__Bacteroidaceaeg__Bacteroidess__Bacteroides_stercoris	11.1751		B-247	c__Clostridiao__Clostridialesf__Ruminococcaceaeg__Faecalibacteriums__Faecalibacterium_prausnitzii	12.8078
				in the Group:				B-247	c__Clostridiao__Clostridialesf__Ruminococcaceaeg__Faecalibacteriums__Faecalibacterium_prausnitzii		8.55463		B-81	c__Bacteroidiao__Bacteroidalesf__Bacteroidaceaeg__Bacteroidess__Bacteroides_stercoris		9.97262			B-81	c__Bacteroidiao__Bacteroidalesf__Bacteroidaceaeg__Bacteroidess__Bacteroides_stercoris	8.34744		B-113	c__Bacteroidiao__Bacteroidalesf__Prevotellaceaeg__Prevotellas__Prevotella_copri	8.59429		B-247	c__Clostridiao__Clostridialesf__Ruminococcaceaeg__Faecalibacteriums__Faecalibacterium_prausnitzii	11.1664		B-395	c__Bacteroidiao__Bacteroidalesf__Bacteroidaceaeg__Bacteroidess__Bacteroides_vulgatus	9.81098
	Bacteria-type		Percentage					B-81	c__Bacteroidiao__Bacteroidalesf__Bacteroidaceaeg__Bacteroidess__Bacteroides_stercoris		7.40983		B-395	c__Bacteroidiao__Bacteroidalesf__Bacteroidaceaeg__Bacteroidess__Bacteroides_vulgatus		7.6338			B-277	c__Clostridiao__Clostridialesf__Lachnospiraceaeg__Roseburias__Roseburia_intestinalis	6.37521		B-395	c__Bacteroidiao__Bacteroidalesf__Bacteroidaceaeg__Bacteroidess__Bacteroides_vulgatus	6.64045		B-395	c__Bacteroidiao__Bacteroidalesf__Bacteroidaceaeg__Bacteroidess__Bacteroides_vulgatus	9.6534		B-394	c__Bacteroidiao__Bacteroidalesf__Bacteroidaceaeg__Bacteroidess__Bacteroides_uniformis	7.15439
		B-394	8.61788		CDM			B-66	c__Bacteroidiao__Bacteroidalesf__Bacteroidaceaeg__Bacteroidess__Bacteroides_fragilis		6.81353		B-394	c__Bacteroidiao__Bacteroidalesf__Bacteroidaceaeg__Bacteroidess__Bacteroides_uniformis		7.03202			B-394	c__Bacteroidiao__Bacteroidalesf__Bacteroidaceaeg__Bacteroidess__Bacteroides_uniformis	6.16168		B-394	c__Bacteroidiao__Bacteroidalesf__Bacteroidaceaeg__Bacteroidess__Bacteroides_uniformis	6.58541		B-243	c__Clostridiao__Clostridialesf__Eubacteriaceaeg__Eubacteriums__Eubacterium_rectale	9.45357		B-66	c__Bacteroidiao__Bacteroidalesf__Bacteroidaceaeg__Bacteroidess__Bacteroides_fragilis	5.82409
		B-247	8.55463					B-243	c__Clostridiao__Clostridialesf__Eubacteriaceaeg__Eubacteriums__Eubacterium_rectale		4.49934		B-57	c__Bacteroidiao__Bacteroidalesf__Bacteroidaceaeg__Bacteroidess__Bacteroides_caccae		6.05981			B-395	c__Bacteroidiao__Bacteroidalesf__Bacteroidaceaeg__Bacteroidess__Bacteroides_vulgatus	5.99615		B-292	c__Clostridiao__Clostridialesf__Ruminococcaceaeg__Subdoligranulums__Subdoligranulum_unclassified	5.97386		B-113	c__Bacteroidiao__Bacteroidalesf__Prevotellaceaeg__Prevotellas__Prevotella_copri	8.66816		B-243	c__Clostridiao__Clostridialesf__Eubacteriaceaeg__Eubacteriums__Eubacterium_rectale	5.7754
		B-81	7.40983					B-395	c__Bacteroidiao__Bacteroidalesf__Bacteroidaceaeg__Bacteroidess__Bacteroides_vulgatus		3.9863		B-47	c__Bacteroidiao__Bacteroidalesf__Rikenellaceaeg__Alistipess__Alistipes_putredinis		4.91898			B-113	c__Bacteroidiao__Bacteroidalesf__Prevotellaceaeg__Prevotellas__Prevotella_copri	3.95131		B-47	c__Bacteroidiao__Bacteroidalesf__Rikenellaceaeg__Alistipess__Alistipes_putredinis	4.66436		B-277	c__Clostridiao__Clostridialesf__Lachnospiraceaeg__Roseburias__Roseburia_intestinalis	4.73817		B-81	c__Bacteroidiao__Bacteroidalesf__Bacteroidaceaeg__Bacteroidess__Bacteroides_stercoris	4.92158
								B-72	c__Bacteroidiao__Bacteroidalesf__Bacteroidaceaeg__Bacteroidess__Bacteroides_ovatus		3.05802		B-113	c__Bacteroidiao__Bacteroidalesf__Prevotellaceaeg__Prevotellas__Prevotella_copri		4.70809			B-243	c__Clostridiao__Clostridialesf__Eubacteriaceaeg__Eubacteriums__Eubacterium_rectale	3.85178		B-243	c__Clostridiao__Clostridialesf__Eubacteriaceaeg__Eubacteriums__Eubacterium_rectale	4.28953		B-72	c__Bacteroidiao__Bacteroidalesf__Bacteroidaceaeg__Bacteroidess__Bacteroides_ovatus	4.40647		B-113	c__Bacteroidiao__Bacteroidalesf__Prevotellaceaeg__Prevotellas__Prevotella_copri	4.51128
		B-247	10.1201		CDF			B-292	c__Clostridiao__Clostridialesf__Ruminococcaceaeg__Subdoligranulums__Subdoligranulum_unclassified		2.9358		B-243	c__Clostridiao__Clostridialesf__Eubacteriaceaeg__Eubacteriums__Eubacterium_rectale		4.52514			B-47	c__Bacteroidiao__Bacteroidalesf__Rikenellaceaeg__Alistipess__Alistipes_putredinis	3.4445		B-392	c__Verrucomicrobiaeo__Verrucomicrobialesf__Verrucomicrobiaceaeg__Akkermansias__Akkermansia_muciniphila	3.44008		B-292	c__Clostridiao__Clostridialesf__Ruminococcaceaeg__Subdoligranulums__Subdoligranulum_unclassified	4.31816		B-72	c__Bacteroidiao__Bacteroidalesf__Bacteroidaceaeg__Bacteroidess__Bacteroides_ovatus	3.9639
		B-81	9.97262					B-362	c__Gammaproteobacteriao__Enterobacterialesf__Enterobacteriaceaeg__Escherichias__Escherichia_coli		2.93507		B-72	c__Bacteroidiao__Bacteroidalesf__Bacteroidaceaeg__Bacteroidess__Bacteroides_ovatus		3.79266			B-292	c__Clostridiao__Clostridialesf__Ruminococcaceaeg__Subdoligranulums__Subdoligranulum_unclassified	3.06019		B-69	c__Bacteroidiao__Bacteroidalesf__Bacteroidaceaeg__Bacteroidess__Bacteroides_massiliensis	3.23933		B-394	c__Bacteroidiao__Bacteroidalesf__Bacteroidaceaeg__Bacteroidess__Bacteroides_uniformis	4.29122		B-292	c__Clostridiao__Clostridialesf__Ruminococcaceaeg__Subdoligranulums__Subdoligranulum_unclassified	3.37556
		B-395	7.6338					B-277	c__Clostridiao__Clostridialesf__Lachnospiraceaeg__Roseburias__Roseburia_intestinalis		2.34122		B-292	c__Clostridiao__Clostridialesf__Ruminococcaceaeg__Subdoligranulums__Subdoligranulum_unclassified		3.25019			B-58	c__Bacteroidiao__Bacteroidalesf__Bacteroidaceaeg__Bacteroidess__Bacteroides_cellulosilyticus	3.03948		B-61	c__Bacteroidiao__Bacteroidalesf__Bacteroidaceaeg__Bacteroidess__Bacteroides_dorei	3.13055		B-69	c__Bacteroidiao__Bacteroidalesf__Bacteroidaceaeg__Bacteroidess__Bacteroides_massiliensis	3.43034		B-57	c__Bacteroidiao__Bacteroidalesf__Bacteroidaceaeg__Bacteroidess__Bacteroides_caccae	3.1825
								B-61	c__Bacteroidiao__Bacteroidalesf__Bacteroidaceaeg__Bacteroidess__Bacteroides_dorei		2.14079		B-392	c__Verrucomicrobiaeo__Verrucomicrobialesf__Verrucomicrobiaceaeg__Akkermansias__Akkermansia_muciniphila		3.1675			B-57	c__Bacteroidiao__Bacteroidalesf__Bacteroidaceaeg__Bacteroidess__Bacteroides_caccae	2.43246		B-57	c__Bacteroidiao__Bacteroidalesf__Bacteroidaceaeg__Bacteroidess__Bacteroides_caccae	3.10677		B-99	c__Bacteroidiao__Bacteroidalesf__Porphyromonadaceaeg__Parabacteroidess__Parabacteroides_unclassified	2.07566		B-277	c__Clostridiao__Clostridialesf__Lachnospiraceaeg__Roseburias__Roseburia_intestinalis	2.95745
		B-247	13.5947		NONF			B-329	c__Negativicuteso__Selenomonadalesf__Veillonellaceaeg__Veillonellas__Veillonella_parvula		2.12512		B-96	c__Bacteroidiao__Bacteroidalesf__Porphyromonadaceaeg__Parabacteroidess__Parabacteroides_merdae		2.71614			B-96	c__Bacteroidiao__Bacteroidalesf__Porphyromonadaceaeg__Parabacteroidess__Parabacteroides_merdae	2.178		B-82	c__Bacteroidiao__Bacteroidalesf__Bacteroidaceaeg__Bacteroidess__Bacteroides_thetaiotaomicron	2.86283		B-82	c__Bacteroidiao__Bacteroidalesf__Bacteroidaceaeg__Bacteroidess__Bacteroides_thetaiotaomicron	1.91085		B-62	c__Bacteroidiao__Bacteroidalesf__Bacteroidaceaeg__Bacteroidess__Bacteroides_eggerthii	2.77954
		B-81	8.34744					B-99	c__Bacteroidiao__Bacteroidalesf__Porphyromonadaceaeg__Parabacteroidess__Parabacteroides_unclassified		1.93047		B-66	c__Bacteroidiao__Bacteroidalesf__Bacteroidaceaeg__Bacteroidess__Bacteroides_fragilis		2.38171			B-244	c__Clostridiao__Clostridialesf__Eubacteriaceaeg__Eubacteriums__Eubacterium_siraeum	2.01713		B-81	c__Bacteroidiao__Bacteroidalesf__Bacteroidaceaeg__Bacteroidess__Bacteroides_stercoris	2.75954		B-47	c__Bacteroidiao__Bacteroidalesf__Rikenellaceaeg__Alistipess__Alistipes_putredinis	1.73526		B-96	c__Bacteroidiao__Bacteroidalesf__Porphyromonadaceaeg__Parabacteroidess__Parabacteroides_merdae	2.48846
		B-277	6.37521					B-47	c__Bacteroidiao__Bacteroidalesf__Rikenellaceaeg__Alistipess__Alistipes_putredinis		1.82585		B-82	c__Bacteroidiao__Bacteroidalesf__Bacteroidaceaeg__Bacteroidess__Bacteroides_thetaiotaomicron		1.91895			B-72	c__Bacteroidiao__Bacteroidalesf__Bacteroidaceaeg__Bacteroidess__Bacteroides_ovatus	1.85195		B-96	c__Bacteroidiao__Bacteroidalesf__Porphyromonadaceaeg__Parabacteroidess__Parabacteroides_merdae	2.33042		B-57	c__Bacteroidiao__Bacteroidalesf__Bacteroidaceaeg__Bacteroidess__Bacteroides_caccae	1.69048		B-61	c__Bacteroidiao__Bacteroidalesf__Bacteroidaceaeg__Bacteroidess__Bacteroides_dorei	2.36547
								B-69	c__Bacteroidiao__Bacteroidalesf__Bacteroidaceaeg__Bacteroidess__Bacteroides_massiliensis		1.68003		B-277	c__Clostridiao__Clostridialesf__Lachnospiraceaeg__Roseburias__Roseburia_intestinalis		1.6858			B-282	c__Clostridiao__Clostridialesf__Ruminococcaceaeg__Ruminococcuss__Ruminococcus_bromii	1.79464		B-84	c__Bacteroidiao__Bacteroidalesf__Porphyromonadaceaeg__Barnesiellas__Barnesiella_intestinihominis	1.63697		B-66	c__Bacteroidiao__Bacteroidalesf__Bacteroidaceaeg__Bacteroidess__Bacteroides_fragilis	1.57965		B-64	c__Bacteroidiao__Bacteroidalesf__Bacteroidaceaeg__Bacteroidess__Bacteroides_finegoldii	1.67782
		B-247	10.6477		NONM			B-315	c__Negativicuteso__Selenomonadalesf__Acidaminococcaceaeg__Acidaminococcuss__Acidaminococcus_unclassified		1.66836		B-244	c__Clostridiao__Clostridialesf__Eubacteriaceaeg__Eubacteriums__Eubacterium_siraeum		1.63801			B-62	c__Bacteroidiao__Bacteroidalesf__Bacteroidaceaeg__Bacteroidess__Bacteroides_eggerthii	1.69136		B-79	c__Bacteroidiao__Bacteroidalesf__Bacteroidaceaeg__Bacteroidess__Bacteroides_sp_4_3_47FAA	1.63488		B-317	c__Negativicuteso__Selenomonadalesf__Veillonellaceaeg__Dialisters__Dialister_invisus	1.35366		B-239	c__Clostridiao__Clostridialesf__Eubacteriaceaeg__Eubacteriums__Eubacterium_eligens	1.28111
		B-113	8.59429					B-317	c__Negativicuteso__Selenomonadalesf__Veillonellaceaeg__Dialisters__Dialister_invisus		1.56767		B-317	c__Negativicuteso__Selenomonadalesf__Veillonellaceaeg__Dialisters__Dialister_invisus		1.61115			B-317	c__Negativicuteso__Selenomonadalesf__Veillonellaceaeg__Dialisters__Dialister_invisus	1.53657		B-277	c__Clostridiao__Clostridialesf__Lachnospiraceaeg__Roseburias__Roseburia_intestinalis	1.60239		B-266	c__Clostridiao__Clostridialesf__Oscillospiraceaeg__Oscillibacters__Oscillibacter_unclassified	1.32286		B-47	c__Bacteroidiao__Bacteroidalesf__Rikenellaceaeg__Alistipess__Alistipes_putredinis	1.27017
		B-395	6.64045					B-373	c__Gammaproteobacteriao__Enterobacterialesf__Enterobacteriaceaeg__Klebsiellas__Klebsiella_pneumoniae		1.53516		B-79	c__Bacteroidiao__Bacteroidalesf__Bacteroidaceaeg__Bacteroidess__Bacteroides_sp_4_3_47FAA		1.50674			B-84	c__Bacteroidiao__Bacteroidalesf__Porphyromonadaceaeg__Barnesiellas__Barnesiella_intestinihominis	1.35577		B-72	c__Bacteroidiao__Bacteroidalesf__Bacteroidaceaeg__Bacteroidess__Bacteroides_ovatus	1.53746		B-96	c__Bacteroidiao__Bacteroidalesf__Porphyromonadaceaeg__Parabacteroidess__Parabacteroides_merdae	1.29467		B-69	c__Bacteroidiao__Bacteroidalesf__Bacteroidaceaeg__Bacteroidess__Bacteroides_massiliensis	1.24446
								B-286	c__Clostridiao__Clostridialesf__Lachnospiraceaeg__Blautias__Ruminococcus_gnavus		1.43485		B-93	c__Bacteroidiao__Bacteroidalesf__Porphyromonadaceaeg__Parabacteroidess__Parabacteroides_distasonis		1.46984			B-66	c__Bacteroidiao__Bacteroidalesf__Bacteroidaceaeg__Bacteroidess__Bacteroides_fragilis	1.33743		B-62	c__Bacteroidiao__Bacteroidalesf__Bacteroidaceaeg__Bacteroidess__Bacteroides_eggerthii	1.35205		B-62	c__Bacteroidiao__Bacteroidalesf__Bacteroidaceaeg__Bacteroidess__Bacteroides_eggerthii	0.96805		B-93	c__Bacteroidiao__Bacteroidalesf__Porphyromonadaceaeg__Parabacteroidess__Parabacteroides_distasonis	1.1135
		B-81	11.1751		UCM			B-96	c__Bacteroidiao__Bacteroidalesf__Porphyromonadaceaeg__Parabacteroidess__Parabacteroides_merdae		1.39261		B-58	c__Bacteroidiao__Bacteroidalesf__Bacteroidaceaeg__Bacteroidess__Bacteroides_cellulosilyticus		1.26355			B-82	c__Bacteroidiao__Bacteroidalesf__Bacteroidaceaeg__Bacteroidess__Bacteroides_thetaiotaomicron	1.29911		B-73	c__Bacteroidiao__Bacteroidalesf__Bacteroidaceaeg__Bacteroidess__Bacteroides_plebeius	1.07973		B-93	c__Bacteroidiao__Bacteroidalesf__Porphyromonadaceaeg__Parabacteroidess__Parabacteroides_distasonis	0.796422		B-84	c__Bacteroidiao__Bacteroidalesf__Porphyromonadaceaeg__Barnesiellas__Barnesiella_intestinihominis	0.938173
		B-247	11.1664					B-57	c__Bacteroidiao__Bacteroidalesf__Bacteroidaceaeg__Bacteroidess__Bacteroides_caccae		1.30841		B-362	c__Gammaproteobacteriao__Enterobacterialesf__Enterobacteriaceaeg__Escherichias__Escherichia_coli		1.24624			B-93	c__Bacteroidiao__Bacteroidalesf__Porphyromonadaceaeg__Parabacteroidess__Parabacteroides_distasonis	1.26729		B-205	c__Clostridiao__Clostridialesf__Lachnospiraceaeg__Butyrivibrios__Butyrivibrio_crossotus	1.07717		B-236	c__Clostridiao__Clostridialesf__Lachnospiraceaeg__Doreas__Dorea_longicatena	0.795115		B-266	c__Clostridiao__Clostridialesf__Oscillospiraceaeg__Oscillibacters__Oscillibacter_unclassified	0.912128
		B-395	9.6534					B-79	c__Bacteroidiao__Bacteroidalesf__Bacteroidaceaeg__Bacteroidess__Bacteroides_sp_4_3_47FAA		1.21862		B-62	c__Bacteroidiao__Bacteroidalesf__Bacteroidaceaeg__Bacteroidess__Bacteroides_eggerthii		1.15475			B-46	c__Bacteroidiao__Bacteroidalesf__Rikenellaceaeg__Alistipess__Alistipes_onderdonkii	1.19215		B-46	c__Bacteroidiao__Bacteroidalesf__Rikenellaceaeg__Alistipess__Alistipes_onderdonkii	0.942572		B-290	c__Clostridiao__Clostridialesf__Lachnospiraceaeg__Blautias__Ruminococcus_torques	0.606212		B-99	c__Bacteroidiao__Bacteroidalesf__Porphyromonadaceaeg__Parabacteroidess__Parabacteroides_unclassified	0.895684
								B-58	c__Bacteroidiao__Bacteroidalesf__Bacteroidaceaeg__Bacteroidess__Bacteroides_cellulosilyticus		1.2156		B-77	c__Bacteroidiao__Bacteroidalesf__Bacteroidaceaeg__Bacteroidess__Bacteroides_sp_2_1_22		1.03741			B-88	c__Bacteroidiao__Bacteroidalesf__Porphyromonadaceaeg__Dysgonomonass__Dysgonomonas_mossii	1.09587		B-244	c__Clostridiao__Clostridialesf__Eubacteriaceaeg__Eubacteriums__Eubacterium_siraeum	0.900408		B-337	c__Betaproteobacteriao__Burkholderialesf__Burkholderiales_nonameg__Burkholderiales_nonames__Burkholderiales_bacterium_1_1_47	0.601176		B-58	c__Bacteroidiao__Bacteroidalesf__Bacteroidaceaeg__Bacteroidess__Bacteroides_cellulosilyticus	0.841828
		B-247	12.8078		UCF			B-82	c__Bacteroidiao__Bacteroidalesf__Bacteroidaceaeg__Bacteroidess__Bacteroides_thetaiotaomicron		1.08366		B-84	c__Bacteroidiao__Bacteroidalesf__Porphyromonadaceaeg__Barnesiellas__Barnesiella_intestinihominis		0.97223			B-61	c__Bacteroidiao__Bacteroidalesf__Bacteroidaceaeg__Bacteroidess__Bacteroides_dorei	0.979381		B-49	c__Bacteroidiao__Bacteroidalesf__Rikenellaceaeg__Alistipess__Alistipes_shahii	0.898846		B-362	c__Gammaproteobacteriao__Enterobacterialesf__Enterobacteriaceaeg__Escherichias__Escherichia_coli	0.591876		B-244	c__Clostridiao__Clostridialesf__Eubacteriaceaeg__Eubacteriums__Eubacterium_siraeum	0.837036
		B-395	9.81098					B-46	c__Bacteroidiao__Bacteroidalesf__Rikenellaceaeg__Alistipess__Alistipes_onderdonkii		1.02238		B-266	c__Clostridiao__Clostridialesf__Oscillospiraceaeg__Oscillibacters__Oscillibacter_unclassified		0.918043			B-278	c__Clostridiao__Clostridialesf__Lachnospiraceaeg__Roseburias__Roseburia_inulinivorans	0.953167		B-58	c__Bacteroidiao__Bacteroidalesf__Bacteroidaceaeg__Bacteroidess__Bacteroides_cellulosilyticus	0.857559		B-278	c__Clostridiao__Clostridialesf__Lachnospiraceaeg__Roseburias__Roseburia_inulinivorans	0.556181		B-278	c__Clostridiao__Clostridialesf__Lachnospiraceaeg__Roseburias__Roseburia_inulinivorans	0.763732
		B-394	7.15439					B-392	c__Verrucomicrobiaeo__Verrucomicrobialesf__Verrucomicrobiaceaeg__Akkermansias__Akkermansia_muciniphila		0.982308		B-46	c__Bacteroidiao__Bacteroidalesf__Rikenellaceaeg__Alistipess__Alistipes_onderdonkii		0.88762			B-83	c__Bacteroidiao__Bacteroidalesf__Bacteroidaceaeg__Bacteroidess__Bacteroides_xylanisolvens	0.878064		B-278	c__Clostridiao__Clostridialesf__Lachnospiraceaeg__Roseburias__Roseburia_inulinivorans	0.839232		B-239	c__Clostridiao__Clostridialesf__Eubacteriaceaeg__Eubacteriums__Eubacterium_eligens	0.538776		B-60	c__Bacteroidiao__Bacteroidalesf__Bacteroidaceaeg__Bacteroidess__Bacteroides_coprocola	0.718609
								B-60	c__Bacteroidiao__Bacteroidalesf__Bacteroidaceaeg__Bacteroidess__Bacteroides_coprocola		0.769524		B-61	c__Bacteroidiao__Bacteroidalesf__Bacteroidaceaeg__Bacteroidess__Bacteroides_dorei		0.879345			B-362	c__Gammaproteobacteriao__Enterobacterialesf__Enterobacteriaceaeg__Escherichias__Escherichia_coli	0.844824		B-343	c__Betaproteobacteriao__Burkholderialesf__Sutterellaceaeg__Sutterellas__Sutterella_wadsworthensis	0.746607		B-65	c__Bacteroidiao__Bacteroidalesf__Bacteroidaceaeg__Bacteroidess__Bacteroides_fluxus	0.481436		B-65	c__Bacteroidiao__Bacteroidalesf__Bacteroidaceaeg__Bacteroidess__Bacteroides_fluxus	0.679242
								B-290	c__Clostridiao__Clostridialesf__Lachnospiraceaeg__Blautias__Ruminococcus_torques		0.767675		B-290	c__Clostridiao__Clostridialesf__Lachnospiraceaeg__Blautias__Ruminococcus_torques		0.738223			B-331	c__Negativicuteso__Selenomonadalesf__Veillonellaceaeg__Veillonellas__Veillonella_unclassified	0.698028		B-276	c__Clostridiao__Clostridialesf__Lachnospiraceaeg__Roseburias__Roseburia_hominis	0.691184		B-343	c__Betaproteobacteriao__Burkholderialesf__Sutterellaceaeg__Sutterellas__Sutterella_wadsworthensis	0.465483		B-80	c__Bacteroidiao__Bacteroidalesf__Bacteroidaceaeg__Bacteroidess__Bacteroides_sp_9_1_42FAA	0.626596
								B-93	c__Bacteroidiao__Bacteroidalesf__Porphyromonadaceaeg__Parabacteroidess__Parabacteroides_distasonis		0.765857		B-16	c__Actinobacteriao__Bifidobacterialesf__Bifidobacteriaceaeg__Bifidobacteriums__Bifidobacterium_longum		0.502783			B-52	c__Bacteroidiao__Bacteroidalesf__Rikenellaceaeg__Alistipess__Alistipes_unclassified	0.666293		B-317	c__Negativicuteso__Selenomonadalesf__Veillonellaceaeg__Dialisters__Dialister_invisus	0.65103		B-46	c__Bacteroidiao__Bacteroidalesf__Rikenellaceaeg__Alistipess__Alistipes_onderdonkii	0.445166		B-82	c__Bacteroidiao__Bacteroidalesf__Bacteroidaceaeg__Bacteroidess__Bacteroides_thetaiotaomicron	0.623952
								B-343	c__Betaproteobacteriao__Burkholderialesf__Sutterellaceaeg__Sutterellas__Sutterella_wadsworthensis		0.714623		B-213	c__Clostridiao__Clostridialesf__Clostridiaceaeg__Clostridiums__Clostridium_bolteae		0.473247			B-64	c__Bacteroidiao__Bacteroidalesf__Bacteroidaceaeg__Bacteroidess__Bacteroides_finegoldii	0.624472		B-239	c__Clostridiao__Clostridialesf__Eubacteriaceaeg__Eubacteriums__Eubacterium_eligens	0.633937		B-322	c__Negativicuteso__Selenomonadalesf__Veillonellaceaeg__Megamonass__Megamonas_unclassified	0.377453		B-46	c__Bacteroidiao__Bacteroidalesf__Rikenellaceaeg__Alistipess__Alistipes_onderdonkii	0.563419
								B-76	c__Bacteroidiao__Bacteroidalesf__Bacteroidaceaeg__Bacteroidess__Bacteroides_sp_1_1_6		0.710908		B-91	c__Bacteroidiao__Bacteroidalesf__Porphyromonadaceaeg__Odoribacters__Odoribacter_splanchnicus		0.381841			B-44	c__Bacteroidiao__Bacteroidalesf__Rikenellaceaeg__Alistipess__Alistipes_finegoldii	0.597106		B-91	c__Bacteroidiao__Bacteroidalesf__Porphyromonadaceaeg__Odoribacters__Odoribacter_splanchnicus	0.629963		B-91	c__Bacteroidiao__Bacteroidalesf__Porphyromonadaceaeg__Odoribacters__Odoribacter_splanchnicus	0.357326		B-290	c__Clostridiao__Clostridialesf__Lachnospiraceaeg__Blautias__Ruminococcus_torques	0.533651
								B-271	c__Clostridiao__Clostridialesf__Peptostreptococcaceaeg__Peptostreptococcaceae_nonames__Peptostreptococcaceae_noname_unclassified		0.704984		B-344	c__Deltaproteobacteriao__Desulfovibrionalesf__Desulfovibrionaceaeg__Bilophilas__Bilophila_unclassified		0.35499			B-367	c__Gammaproteobacteriao__Pasteurellalesf__Pasteurellaceaeg__Haemophiluss__Haemophilus_parainfluenzae	0.592325		B-290	c__Clostridiao__Clostridialesf__Lachnospiraceaeg__Blautias__Ruminococcus_torques	0.561635		B-83	c__Bacteroidiao__Bacteroidalesf__Bacteroidaceaeg__Bacteroidess__Bacteroides_xylanisolvens	0.349708		B-362	c__Gammaproteobacteriao__Enterobacterialesf__Enterobacteriaceaeg__Escherichias__Escherichia_coli	0.503526
								B-213	c__Clostridiao__Clostridialesf__Clostridiaceaeg__Clostridiums__Clostridium_bolteae		0.678055		B-63	c__Bacteroidiao__Bacteroidalesf__Bacteroidaceaeg__Bacteroidess__Bacteroides_faecis		0.336157			B-290	c__Clostridiao__Clostridialesf__Lachnospiraceaeg__Blautias__Ruminococcus_torques	0.556801		B-93	c__Bacteroidiao__Bacteroidalesf__Porphyromonadaceaeg__Parabacteroidess__Parabacteroides_distasonis	0.528162		B-74	c__Bacteroidiao__Bacteroidalesf__Bacteroidaceaeg__Bacteroidess__Bacteroides_salyersiae	0.346145		B-213	c__Clostridiao__Clostridialesf__Clostridiaceaeg__Clostridiums__Clostridium_bolteae	0.44134
								B-83	c__Bacteroidiao__Bacteroidalesf__Bacteroidaceaeg__Bacteroidess__Bacteroides_xylanisolvens		0.6534		B-239	c__Clostridiao__Clostridialesf__Eubacteriaceaeg__Eubacteriums__Eubacterium_eligens		0.318726			B-87	c__Bacteroidiao__Bacteroidalesf__Porphyromonadaceaeg__Dysgonomonass__Dysgonomonas_gadei	0.549264		B-101	c__Bacteroidiao__Bacteroidalesf__Prevotellaceaeg__Paraprevotellas__Paraprevotella_unclassified	0.523016		B-64	c__Bacteroidiao__Bacteroidalesf__Bacteroidaceaeg__Bacteroidess__Bacteroides_finegoldii	0.319478		B-392	c__Verrucomicrobiaeo__Verrucomicrobialesf__Verrucomicrobiaceaeg__Akkermansias__Akkermansia_muciniphila	0.42213
								B-144	c__Bacillio__Lactobacillalesf__Lactobacillaceaeg__Lactobacilluss__Lactobacillus_acidophilus		0.613291		B-83	c__Bacteroidiao__Bacteroidalesf__Bacteroidaceaeg__Bacteroidess__Bacteroides_xylanisolvens		0.318007			B-286	c__Clostridiao__Clostridialesf__Lachnospiraceaeg__Blautias__Ruminococcus_gnavus	0.535516		B-66	c__Bacteroidiao__Bacteroidalesf__Bacteroidaceaeg__Bacteroidess__Bacteroides_fragilis	0.51359		B-49	c__Bacteroidiao__Bacteroidalesf__Rikenellaceaeg__Alistipess__Alistipes_shahii	0.315001		B-63	c__Bacteroidiao__Bacteroidalesf__Bacteroidaceaeg__Bacteroidess__Bacteroides_faecis	0.401687
								B-113	c__Bacteroidiao__Bacteroidalesf__Prevotellaceaeg__Prevotellas__Prevotella_copri		0.608735		B-89	c__Bacteroidiao__Bacteroidalesf__Porphyromonadaceaeg__Dysgonomonass__Dysgonomonas_unclassified		0.308261			B-69	c__Bacteroidiao__Bacteroidalesf__Bacteroidaceaeg__Bacteroidess__Bacteroides_massiliensis	0.534851		B-234	c__Clostridiao__Clostridialesf__Lachnospiraceaeg__Coprococcuss__Coprococcus_sp_ART55_1	0.506303		B-230	c__Clostridiao__Clostridialesf__Clostridiaceaeg__Clostridiums__Clostridium_symbiosum	0.239314		B-287	c__Clostridiao__Clostridialesf__Ruminococcaceaeg__Ruminococcuss__Ruminococcus_lactaris	0.376528
								B-91	c__Bacteroidiao__Bacteroidalesf__Porphyromonadaceaeg__Odoribacters__Odoribacter_splanchnicus		0.58115		B-227	c__Clostridiao__Clostridialesf__Clostridiaceaeg__Clostridiums__Clostridium_sp_KLE_1755		0.294851			B-392	c__Verrucomicrobiaeo__Verrucomicrobialesf__Verrucomicrobiaceaeg__Akkermansias__Akkermansia_muciniphila	0.52168		B-64	c__Bacteroidiao__Bacteroidalesf__Bacteroidaceaeg__Bacteroidess__Bacteroides_finegoldii	0.499656		B-16	c__Actinobacteriao__Bifidobacterialesf__Bifidobacteriaceaeg__Bifidobacteriums__Bifidobacterium_longum	0.230193		B-44	c__Bacteroidiao__Bacteroidalesf__Rikenellaceaeg__Alistipess__Alistipes_finegoldii	0.329842
								B-378	c__Gammaproteobacteriao__Enterobacterialesf__Enterobacteriaceaeg__Proteuss__Proteus_mirabilis		0.562882		B-331	c__Negativicuteso__Selenomonadalesf__Veillonellaceaeg__Veillonellas__Veillonella_unclassified		0.286353			B-49	c__Bacteroidiao__Bacteroidalesf__Rikenellaceaeg__Alistipess__Alistipes_shahii	0.501256		B-83	c__Bacteroidiao__Bacteroidalesf__Bacteroidaceaeg__Bacteroidess__Bacteroides_xylanisolvens	0.446083		B-288	c__Clostridiao__Clostridialesf__Lachnospiraceaeg__Blautias__Ruminococcus_obeum	0.229603		B-367	c__Gammaproteobacteriao__Pasteurellalesf__Pasteurellaceaeg__Haemophiluss__Haemophilus_parainfluenzae	0.327022
								B-278	c__Clostridiao__Clostridialesf__Lachnospiraceaeg__Roseburias__Roseburia_inulinivorans		0.557089		B-276	c__Clostridiao__Clostridialesf__Lachnospiraceaeg__Roseburias__Roseburia_hominis		0.263634			B-16	c__Actinobacteriao__Bifidobacterialesf__Bifidobacteriaceaeg__Bifidobacteriums__Bifidobacterium_longum	0.492801		B-63	c__Bacteroidiao__Bacteroidalesf__Bacteroidaceaeg__Bacteroidess__Bacteroides_faecis	0.409229		B-232	c__Clostridiao__Clostridialesf__Lachnospiraceaeg__Coprococcuss__Coprococcus_comes	0.208792		B-317	c__Negativicuteso__Selenomonadalesf__Veillonellaceaeg__Dialisters__Dialister_invisus	0.319941
								B-331	c__Negativicuteso__Selenomonadalesf__Veillonellaceaeg__Veillonellas__Veillonella_unclassified		0.543472		B-254	c__Clostridiao__Clostridialesf__Lachnospiraceaeg__Lachnospiraceae_nonames__Lachnospiraceae_bacterium_3_1_46FAA		0.261473			B-51	c__Bacteroidiao__Bacteroidalesf__Rikenellaceaeg__Alistipess__Alistipes_sp_HGB5	0.47448		B-266	c__Clostridiao__Clostridialesf__Oscillospiraceaeg__Oscillibacters__Oscillibacter_unclassified	0.386844		B-101	c__Bacteroidiao__Bacteroidalesf__Prevotellaceaeg__Paraprevotellas__Paraprevotella_unclassified	0.202973		B-91	c__Bacteroidiao__Bacteroidalesf__Porphyromonadaceaeg__Odoribacters__Odoribacter_splanchnicus	0.319151
								B-63	c__Bacteroidiao__Bacteroidalesf__Bacteroidaceaeg__Bacteroidess__Bacteroides_faecis		0.503209		B-240	c__Clostridiao__Clostridialesf__Eubacteriaceaeg__Eubacteriums__Eubacterium_hallii		0.254654			B-74	c__Bacteroidiao__Bacteroidalesf__Bacteroidaceaeg__Bacteroidess__Bacteroides_salyersiae	0.425524		B-282	c__Clostridiao__Clostridialesf__Ruminococcaceaeg__Ruminococcuss__Ruminococcus_bromii	0.385697		B-12	c__Actinobacteriao__Bifidobacterialesf__Bifidobacteriaceaeg__Bifidobacteriums__Bifidobacterium_bifidum	0.201145		B-216	c__Clostridiao__Clostridialesf__Clostridiaceaeg__Clostridiums__Clostridium_clostridioforme	0.31317
								B-84	c__Bacteroidiao__Bacteroidalesf__Porphyromonadaceaeg__Barnesiellas__Barnesiella_intestinihominis		0.474311		B-87	c__Bacteroidiao__Bacteroidalesf__Porphyromonadaceaeg__Dysgonomonass__Dysgonomonas_gadei		0.245837			B-326	c__Negativicuteso__Selenomonadalesf__Acidaminococcaceaeg__Phascolarctobacteriums__Phascolarctobacterium_succinatutens	0.405848		B-9	c__Actinobacteriao__Bifidobacterialesf__Bifidobacteriaceaeg__Bifidobacteriums__Bifidobacterium_adolescentis	0.370689		B-84	c__Bacteroidiao__Bacteroidalesf__Porphyromonadaceaeg__Barnesiellas__Barnesiella_intestinihominis	0.200307		B-344	c__Deltaproteobacteriao__Desulfovibrionalesf__Desulfovibrionaceaeg__Bilophilas__Bilophila_unclassified	0.291549
								B-239	c__Clostridiao__Clostridialesf__Eubacteriaceaeg__Eubacteriums__Eubacterium_eligens		0.466236		B-278	c__Clostridiao__Clostridialesf__Lachnospiraceaeg__Roseburias__Roseburia_inulinivorans		0.242087			B-99	c__Bacteroidiao__Bacteroidalesf__Porphyromonadaceaeg__Parabacteroidess__Parabacteroides_unclassified	0.393817		B-94	c__Bacteroidiao__Bacteroidalesf__Porphyromonadaceaeg__Parabacteroidess__Parabacteroides_goldsteinii	0.352579		B-289	c__Clostridiao__Clostridialesf__Ruminococcaceaeg__Ruminococcuss__Ruminococcus_sp_5_1_39BFAA	0.197481		B-288	c__Clostridiao__Clostridialesf__Lachnospiraceaeg__Blautias__Ruminococcus_obeum	0.238734
								B-333	c__Fusobacteriiao__Fusobacterialesf__Fusobacteriaceaeg__Fusobacteriums__Fusobacterium_nucleatum		0.444624		B-282	c__Clostridiao__Clostridialesf__Ruminococcaceaeg__Ruminococcuss__Ruminococcus_bromii		0.205233			B-91	c__Bacteroidiao__Bacteroidalesf__Porphyromonadaceaeg__Odoribacters__Odoribacter_splanchnicus	0.3854		B-44	c__Bacteroidiao__Bacteroidalesf__Rikenellaceaeg__Alistipess__Alistipes_finegoldii	0.340897		B-279	c__Clostridiao__Clostridialesf__Lachnospiraceaeg__Roseburias__Roseburia_unclassified	0.188442		B-331	c__Negativicuteso__Selenomonadalesf__Veillonellaceaeg__Veillonellas__Veillonella_unclassified	0.238643
								B-266	c__Clostridiao__Clostridialesf__Oscillospiraceaeg__Oscillibacters__Oscillibacter_unclassified		0.415899		B-230	c__Clostridiao__Clostridialesf__Clostridiaceaeg__Clostridiums__Clostridium_symbiosum		0.204059			B-343	c__Betaproteobacteriao__Burkholderialesf__Sutterellaceaeg__Sutterellas__Sutterella_wadsworthensis	0.359729		B-254	c__Clostridiao__Clostridialesf__Lachnospiraceaeg__Lachnospiraceae_nonames__Lachnospiraceae_bacterium_3_1_46FAA	0.324815		B-342	c__Betaproteobacteriao__Burkholderialesf__Sutterellaceaeg__Parasutterellas__Parasutterella_excrementihominis	0.185527		B-236	c__Clostridiao__Clostridialesf__Lachnospiraceaeg__Doreas__Dorea_longicatena	0.234501
								B-44	c__Bacteroidiao__Bacteroidalesf__Rikenellaceaeg__Alistipess__Alistipes_finegoldii		0.412479		B-286	c__Clostridiao__Clostridialesf__Lachnospiraceaeg__Blautias__Ruminococcus_gnavus		0.197557			B-55	c__Bacteroidiao__Bacteroidalesf__Bacteroidales_nonameg__Bacteroidales_nonames__Bacteroidales_bacterium_ph8	0.358531		B-283	c__Clostridiao__Clostridialesf__Ruminococcaceaeg__Ruminococcuss__Ruminococcus_callidus	0.312899		B-9	c__Actinobacteriao__Bifidobacterialesf__Bifidobacteriaceaeg__Bifidobacteriums__Bifidobacterium_adolescentis	0.183096		B-300	c__Erysipelotrichiao__Erysipelotrichalesf__Erysipelotrichaceaeg__Coprobacilluss__Coprobacillus_unclassified	0.224146
								B-16	c__Actinobacteriao__Bifidobacterialesf__Bifidobacteriaceaeg__Bifidobacteriums__Bifidobacterium_longum		0.392604		B-367	c__Gammaproteobacteriao__Pasteurellalesf__Pasteurellaceaeg__Haemophiluss__Haemophilus_parainfluenzae		0.191018			B-344	c__Deltaproteobacteriao__Desulfovibrionalesf__Desulfovibrionaceaeg__Bilophilas__Bilophila_unclassified	0.347602		B-246	c__Clostridiao__Clostridialesf__Eubacteriaceaeg__Eubacteriums__Eubacterium_ventriosum	0.307004		B-213	c__Clostridiao__Clostridialesf__Clostridiaceaeg__Clostridiums__Clostridium_bolteae	0.169502		B-221	c__Clostridiao__Clostridialesf__Clostridiaceaeg__Clostridiums__Clostridium_leptum	0.211336
								B-219	c__Clostridiao__Clostridialesf__Clostridiaceaeg__Clostridiums__Clostridium_hathewayi		0.384281		B-101	c__Bacteroidiao__Bacteroidalesf__Prevotellaceaeg__Paraprevotellas__Paraprevotella_unclassified		0.190827			B-266	c__Clostridiao__Clostridialesf__Oscillospiraceaeg__Oscillibacters__Oscillibacter_unclassified	0.342674		B-367	c__Gammaproteobacteriao__Pasteurellalesf__Pasteurellaceaeg__Haemophiluss__Haemophilus_parainfluenzae	0.286518		B-63	c__Bacteroidiao__Bacteroidalesf__Bacteroidaceaeg__Bacteroidess__Bacteroides_faecis	0.165693		B-246	c__Clostridiao__Clostridialesf__Eubacteriaceaeg__Eubacteriums__Eubacterium_ventriosum	0.202645
								B-52	c__Bacteroidiao__Bacteroidalesf__Rikenellaceaeg__Alistipess__Alistipes_unclassified		0.352655		B-260	c__Clostridiao__Clostridialesf__Lachnospiraceaeg__Lachnospiraceae_nonames__Lachnospiraceae_bacterium_7_1_58FAA		0.173754			B-230	c__Clostridiao__Clostridialesf__Clostridiaceaeg__Clostridiums__Clostridium_symbiosum	0.318091		B-77	c__Bacteroidiao__Bacteroidalesf__Bacteroidaceaeg__Bacteroidess__Bacteroides_sp_2_1_22	0.27873		B-21	c__Actinobacteriao__Coriobacterialesf__Coriobacteriaceaeg__Collinsellas__Collinsella_aerofaciens	0.161135		B-240	c__Clostridiao__Clostridialesf__Eubacteriaceaeg__Eubacteriums__Eubacterium_hallii	0.193371
								B-9	c__Actinobacteriao__Bifidobacterialesf__Bifidobacteriaceaeg__Bifidobacteriums__Bifidobacterium_adolescentis		0.327383		B-343	c__Betaproteobacteriao__Burkholderialesf__Sutterellaceaeg__Sutterellas__Sutterella_wadsworthensis		0.160819			B-221	c__Clostridiao__Clostridialesf__Clostridiaceaeg__Clostridiums__Clostridium_leptum	0.307152		B-331	c__Negativicuteso__Selenomonadalesf__Veillonellaceaeg__Veillonellas__Veillonella_unclassified	0.249257		B-187	c__Bacillio__Lactobacillalesf__Streptococcaceaeg__Streptococcuss__Streptococcus_thermophilus	0.157911		B-227	c__Clostridiao__Clostridialesf__Clostridiaceaeg__Clostridiums__Clostridium_sp_KLE_1755	0.187171
								B-367	c__Gammaproteobacteriao__Pasteurellalesf__Pasteurellaceaeg__Haemophiluss__Haemophilus_parainfluenzae		0.318338		B-265	c__Clostridiao__Clostridialesf__Oscillospiraceaeg__Oscillibacters__Oscillibacter_sp_KLE_1745		0.15876			B-9	c__Actinobacteriao__Bifidobacterialesf__Bifidobacteriaceaeg__Bifidobacteriums__Bifidobacterium_adolescentis	0.305259		B-236	c__Clostridiao__Clostridialesf__Lachnospiraceaeg__Doreas__Dorea_longicatena	0.229808		B-44	c__Bacteroidiao__Bacteroidalesf__Rikenellaceaeg__Alistipess__Alistipes_finegoldii	0.152589		B-286	c__Clostridiao__Clostridialesf__Lachnospiraceaeg__Blautias__Ruminococcus_gnavus	0.180738
								B-314	c__Negativicuteso__Selenomonadalesf__Acidaminococcaceaeg__Acidaminococcuss__Acidaminococcus_intestini		0.315532		B-196	c__Clostridiao__Clostridialesf__Lachnospiraceaeg__Anaerostipess__Anaerostipes_hadrus		0.155514			B-276	c__Clostridiao__Clostridialesf__Lachnospiraceaeg__Roseburias__Roseburia_hominis	0.28607		B-347	c__Deltaproteobacteriao__Desulfovibrionalesf__Desulfovibrionaceaeg__Desulfovibrios__Desulfovibrio_piger	0.215813		B-22	c__Actinobacteriao__Coriobacterialesf__Coriobacteriaceaeg__Collinsellas__Collinsella_intestinalis	0.145942		B-289	c__Clostridiao__Clostridialesf__Ruminococcaceaeg__Ruminococcuss__Ruminococcus_sp_5_1_39BFAA	0.175898
								B-15	c__Actinobacteriao__Bifidobacterialesf__Bifidobacteriaceaeg__Bifidobacteriums__Bifidobacterium_dentium		0.263108		B-222	c__Clostridiao__Clostridialesf__Clostridiaceaeg__Clostridiums__Clostridium_nexile		0.153029			B-287	c__Clostridiao__Clostridialesf__Ruminococcaceaeg__Ruminococcuss__Ruminococcus_lactaris	0.271682		B-362	c__Gammaproteobacteriao__Enterobacterialesf__Enterobacteriaceaeg__Escherichias__Escherichia_coli	0.207168		B-61	c__Bacteroidiao__Bacteroidalesf__Bacteroidaceaeg__Bacteroidess__Bacteroides_dorei	0.133768		B-222	c__Clostridiao__Clostridialesf__Clostridiaceaeg__Clostridiums__Clostridium_nexile	0.170709
								B-147	c__Bacillio__Lactobacillalesf__Lactobacillaceaeg__Lactobacilluss__Lactobacillus_crispatus		0.262374		B-49	c__Bacteroidiao__Bacteroidalesf__Rikenellaceaeg__Alistipess__Alistipes_shahii		0.152633			B-315	c__Negativicuteso__Selenomonadalesf__Acidaminococcaceaeg__Acidaminococcuss__Acidaminococcus_unclassified	0.229976		B-60	c__Bacteroidiao__Bacteroidalesf__Bacteroidaceaeg__Bacteroidess__Bacteroides_coprocola	0.201083		B-235	c__Clostridiao__Clostridialesf__Lachnospiraceaeg__Doreas__Dorea_formicigenerans	0.13293		B-276	c__Clostridiao__Clostridialesf__Lachnospiraceaeg__Roseburias__Roseburia_hominis	0.16541
								B-216	c__Clostridiao__Clostridialesf__Clostridiaceaeg__Clostridiums__Clostridium_clostridioforme		0.25938		B-288	c__Clostridiao__Clostridialesf__Lachnospiraceaeg__Blautias__Ruminococcus_obeum		0.152568			B-329	c__Negativicuteso__Selenomonadalesf__Veillonellaceaeg__Veillonellas__Veillonella_parvula	0.228122		B-279	c__Clostridiao__Clostridialesf__Lachnospiraceaeg__Roseburias__Roseburia_unclassified	0.201056		B-304	c__Erysipelotrichiao__Erysipelotrichalesf__Erysipelotrichaceaeg__Erysipelotrichaceae_nonames__Erysipelotrichaceae_bacterium_5_2_54FAA	0.130966		B-315	c__Negativicuteso__Selenomonadalesf__Acidaminococcaceaeg__Acidaminococcuss__Acidaminococcus_unclassified	0.162763
								B-49	c__Bacteroidiao__Bacteroidalesf__Rikenellaceaeg__Alistipess__Alistipes_shahii		0.253778		B-364	c__Gammaproteobacteriao__Enterobacterialesf__Enterobacteriaceaeg__Escherichias__Escherichia_unclassified		0.141393			B-236	c__Clostridiao__Clostridialesf__Lachnospiraceaeg__Doreas__Dorea_longicatena	0.206071		B-289	c__Clostridiao__Clostridialesf__Ruminococcaceaeg__Ruminococcuss__Ruminococcus_sp_5_1_39BFAA	0.197734		B-276	c__Clostridiao__Clostridialesf__Lachnospiraceaeg__Roseburias__Roseburia_hominis	0.128706		B-234	c__Clostridiao__Clostridialesf__Lachnospiraceaeg__Coprococcuss__Coprococcus_sp_ART55_1	0.157572
								B-356	c__Gammaproteobacteriao__Enterobacterialesf__Enterobacteriaceaeg__Citrobacters__Citrobacter_freundii		0.249052		B-44	c__Bacteroidiao__Bacteroidalesf__Rikenellaceaeg__Alistipess__Alistipes_finegoldii		0.126212			B-213	c__Clostridiao__Clostridialesf__Clostridiaceaeg__Clostridiums__Clostridium_bolteae	0.183471		B-233	c__Clostridiao__Clostridialesf__Lachnospiraceaeg__Coprococcuss__Coprococcus_eutactus	0.185696		B-286	c__Clostridiao__Clostridialesf__Lachnospiraceaeg__Blautias__Ruminococcus_gnavus	0.123274		B-52	c__Bacteroidiao__Bacteroidalesf__Rikenellaceaeg__Alistipess__Alistipes_unclassified	0.156903
								B-375	c__Gammaproteobacteriao__Enterobacterialesf__Enterobacteriaceaeg__Morganellas__Morganella_morganii		0.243172		B-261	c__Clostridiao__Clostridialesf__Lachnospiraceaeg__Lachnospiraceae_nonames__Lachnospiraceae_bacterium_8_1_57FAA		0.121348			B-239	c__Clostridiao__Clostridialesf__Eubacteriaceaeg__Eubacteriums__Eubacterium_eligens	0.17545		B-99	c__Bacteroidiao__Bacteroidalesf__Porphyromonadaceaeg__Parabacteroidess__Parabacteroides_unclassified	0.185263		B-367	c__Gammaproteobacteriao__Pasteurellalesf__Pasteurellaceaeg__Haemophiluss__Haemophilus_parainfluenzae	0.118424		B-68	c__Bacteroidiao__Bacteroidalesf__Bacteroidaceaeg__Bacteroidess__Bacteroides_intestinalis	0.156382
								B-75	c__Bacteroidiao__Bacteroidalesf__Bacteroidaceaeg__Bacteroidess__Bacteroides_sp_1_1_30		0.243138		B-236	c__Clostridiao__Clostridialesf__Lachnospiraceaeg__Doreas__Dorea_longicatena		0.121009			B-245	c__Clostridiao__Clostridialesf__Eubacteriaceaeg__Eubacteriums__Eubacterium_sp_3_1_31	0.162697		B-74	c__Bacteroidiao__Bacteroidalesf__Bacteroidaceaeg__Bacteroidess__Bacteroides_salyersiae	0.174801		B-249	c__Clostridiao__Clostridialesf__Clostridiales_nonameg__Flavonifractors__Flavonifractor_plautii	0.110021		B-77	c__Bacteroidiao__Bacteroidalesf__Bacteroidaceaeg__Bacteroidess__Bacteroides_sp_2_1_22	0.153874
								B-215	c__Clostridiao__Clostridialesf__Clostridiaceaeg__Clostridiums__Clostridium_citroniae		0.228308		B-232	c__Clostridiao__Clostridialesf__Lachnospiraceaeg__Coprococcuss__Coprococcus_comes		0.11613			B-219	c__Clostridiao__Clostridialesf__Clostridiaceaeg__Clostridiums__Clostridium_hathewayi	0.160399		B-98	c__Bacteroidiao__Bacteroidalesf__Porphyromonadaceaeg__Parabacteroidess__Parabacteroides_sp_D13	0.174395		B-70	c__Bacteroidiao__Bacteroidalesf__Bacteroidaceaeg__Bacteroidess__Bacteroides_nordii	0.105128		B-337	c__Betaproteobacteriao__Burkholderialesf__Burkholderiales_nonameg__Burkholderiales_nonames__Burkholderiales_bacterium_1_1_47	0.151432
								B-328	c__Negativicuteso__Selenomonadalesf__Veillonellaceaeg__Veillonellas__Veillonella_dispar		0.219404		B-55	c__Bacteroidiao__Bacteroidalesf__Bacteroidales_nonameg__Bacteroidales_nonames__Bacteroidales_bacterium_ph8		0.115374			B-246	c__Clostridiao__Clostridialesf__Eubacteriaceaeg__Eubacteriums__Eubacterium_ventriosum	0.154777		B-344	c__Deltaproteobacteriao__Desulfovibrionalesf__Desulfovibrionaceaeg__Bilophilas__Bilophila_unclassified	0.162753		B-73	c__Bacteroidiao__Bacteroidalesf__Bacteroidaceaeg__Bacteroidess__Bacteroides_plebeius	0.104776		B-83	c__Bacteroidiao__Bacteroidalesf__Bacteroidaceaeg__Bacteroidess__Bacteroides_xylanisolvens	0.142979
								B-342	c__Betaproteobacteriao__Burkholderialesf__Sutterellaceaeg__Parasutterellas__Parasutterella_excrementihominis		0.195703		B-235	c__Clostridiao__Clostridialesf__Lachnospiraceaeg__Doreas__Dorea_formicigenerans		0.113794			B-337	c__Betaproteobacteriao__Burkholderialesf__Burkholderiales_nonameg__Burkholderiales_nonames__Burkholderiales_bacterium_1_1_47	0.154263		B-68	c__Bacteroidiao__Bacteroidalesf__Bacteroidaceaeg__Bacteroidess__Bacteroides_intestinalis	0.161564		B-280	c__Clostridiao__Clostridialesf__Ruminococcaceaeg__Ruminococcaceae_nonames__Ruminococcaceae_bacterium_D16	0.100414		B-249	c__Clostridiao__Clostridialesf__Clostridiales_nonameg__Flavonifractors__Flavonifractor_plautii	0.138996
								B-254	c__Clostridiao__Clostridialesf__Lachnospiraceaeg__Lachnospiraceae_nonames__Lachnospiraceae_bacterium_3_1_46FAA		0.193628		B-219	c__Clostridiao__Clostridialesf__Clostridiaceaeg__Clostridiums__Clostridium_hathewayi		0.112647			B-249	c__Clostridiao__Clostridialesf__Clostridiales_nonameg__Flavonifractors__Flavonifractor_plautii	0.146398		B-100	c__Bacteroidiao__Bacteroidalesf__Prevotellaceaeg__Paraprevotellas__Paraprevotella_clara	0.16058		B-287	c__Clostridiao__Clostridialesf__Ruminococcaceaeg__Ruminococcuss__Ruminococcus_lactaris	0.0948802		B-21	c__Actinobacteriao__Coriobacterialesf__Coriobacteriaceaeg__Collinsellas__Collinsella_aerofaciens	0.134407
								B-64	c__Bacteroidiao__Bacteroidalesf__Bacteroidaceaeg__Bacteroidess__Bacteroides_finegoldii		0.1864		B-342	c__Betaproteobacteriao__Burkholderialesf__Sutterellaceaeg__Parasutterellas__Parasutterella_excrementihominis		0.11007			B-77	c__Bacteroidiao__Bacteroidalesf__Bacteroidaceaeg__Bacteroidess__Bacteroides_sp_2_1_22	0.137676		B-232	c__Clostridiao__Clostridialesf__Lachnospiraceaeg__Coprococcuss__Coprococcus_comes	0.148555		B-392	c__Verrucomicrobiaeo__Verrucomicrobialesf__Verrucomicrobiaceaeg__Akkermansias__Akkermansia_muciniphila	0.0932721		B-16	c__Actinobacteriao__Bifidobacterialesf__Bifidobacteriaceaeg__Bifidobacteriums__Bifidobacterium_longum	0.133302
								B-282	c__Clostridiao__Clostridialesf__Ruminococcaceaeg__Ruminococcuss__Ruminococcus_bromii		0.179174		B-280	c__Clostridiao__Clostridialesf__Ruminococcaceaeg__Ruminococcaceae_nonames__Ruminococcaceae_bacterium_D16		0.106522			B-378	c__Gammaproteobacteriao__Enterobacterialesf__Enterobacteriaceaeg__Proteuss__Proteus_mirabilis	0.135988		B-240	c__Clostridiao__Clostridialesf__Eubacteriaceaeg__Eubacteriums__Eubacterium_hallii	0.148554		B-260	c__Clostridiao__Clostridialesf__Lachnospiraceaeg__Lachnospiraceae_nonames__Lachnospiraceae_bacterium_7_1_58FAA	0.0919063		B-282	c__Clostridiao__Clostridialesf__Ruminococcaceaeg__Ruminococcuss__Ruminococcus_bromii	0.12735
								B-249	c__Clostridiao__Clostridialesf__Clostridiales_nonameg__Flavonifractors__Flavonifractor_plautii		0.175167		B-249	c__Clostridiao__Clostridialesf__Clostridiales_nonameg__Flavonifractors__Flavonifractor_plautii		0.105115			B-222	c__Clostridiao__Clostridialesf__Clostridiaceaeg__Clostridiums__Clostridium_nexile	0.12566		B-78	c__Bacteroidiao__Bacteroidalesf__Bacteroidaceaeg__Bacteroidess__Bacteroides_sp_3_2_5	0.145145		B-321	c__Negativicuteso__Selenomonadalesf__Veillonellaceaeg__Megamonass__Megamonas_rupellensis	0.0889378		B-230	c__Clostridiao__Clostridialesf__Clostridiaceaeg__Clostridiums__Clostridium_symbiosum	0.11763
								B-279	c__Clostridiao__Clostridialesf__Lachnospiraceaeg__Roseburias__Roseburia_unclassified		0.172217		B-221	c__Clostridiao__Clostridialesf__Clostridiaceaeg__Clostridiums__Clostridium_leptum		0.101164			B-346	c__Deltaproteobacteriao__Desulfovibrionalesf__Desulfovibrionaceaeg__Desulfovibrios__Desulfovibrio_desulfuricans	0.124481		B-55	c__Bacteroidiao__Bacteroidalesf__Bacteroidales_nonameg__Bacteroidales_nonames__Bacteroidales_bacterium_ph8	0.143277		B-254	c__Clostridiao__Clostridialesf__Lachnospiraceaeg__Lachnospiraceae_nonames__Lachnospiraceae_bacterium_3_1_46FAA	0.0779921		B-260	c__Clostridiao__Clostridialesf__Lachnospiraceaeg__Lachnospiraceae_nonames__Lachnospiraceae_bacterium_7_1_58FAA	0.11682
								B-111	c__Bacteroidiao__Bacteroidalesf__Prevotellaceaeg__Prevotellas__Prevotella_buccae		0.169207		B-67	c__Bacteroidiao__Bacteroidalesf__Bacteroidaceaeg__Bacteroidess__Bacteroides_gallinarum		0.0924803			B-101	c__Bacteroidiao__Bacteroidalesf__Prevotellaceaeg__Paraprevotellas__Paraprevotella_unclassified	0.124345		B-341	c__Betaproteobacteriao__Burkholderialesf__Oxalobacteraceaeg__Oxalobacters__Oxalobacter_formigenes	0.142777		B-240	c__Clostridiao__Clostridialesf__Eubacteriaceaeg__Eubacteriums__Eubacterium_hallii	0.076423		B-49	c__Bacteroidiao__Bacteroidalesf__Rikenellaceaeg__Alistipess__Alistipes_shahii	0.116127
								B-337	c__Betaproteobacteriao__Burkholderialesf__Burkholderiales_nonameg__Burkholderiales_nonames__Burkholderiales_bacterium_1_1_47		0.157569		B-242	c__Clostridiao__Clostridialesf__Eubacteriaceaeg__Eubacteriums__Eubacterium_ramulus		0.0892878			B-197	c__Clostridiao__Clostridialesf__Lachnospiraceaeg__Anaerostipess__Anaerostipes_unclassified	0.121946		B-288	c__Clostridiao__Clostridialesf__Lachnospiraceaeg__Blautias__Ruminococcus_obeum	0.129102		B-363	c__Gammaproteobacteriao__Enterobacterialesf__Enterobacteriaceaeg__Escherichias__Escherichia_sp_TW09276	0.0760106		B-264	c__Clostridiao__Clostridialesf__Oscillospiraceaeg__Oscillibacters__Oscillibacter_sp_KLE_1728	0.11611
								B-246	c__Clostridiao__Clostridialesf__Eubacteriaceaeg__Eubacteriums__Eubacterium_ventriosum		0.15557		B-9	c__Actinobacteriao__Bifidobacterialesf__Bifidobacteriaceaeg__Bifidobacteriums__Bifidobacterium_adolescentis		0.0886819			B-324	c__Negativicuteso__Selenomonadalesf__Veillonellaceaeg__Megasphaeras__Megasphaera_unclassified	0.116971		B-228	c__Clostridiao__Clostridialesf__Clostridiaceaeg__Clostridiums__Clostridium_sp_L2_50	0.119022		B-77	c__Bacteroidiao__Bacteroidalesf__Bacteroidaceaeg__Bacteroidess__Bacteroides_sp_2_1_22	0.074352		B-219	c__Clostridiao__Clostridialesf__Clostridiaceaeg__Clostridiums__Clostridium_hathewayi	0.110764
								B-101	c__Bacteroidiao__Bacteroidalesf__Prevotellaceaeg__Paraprevotellas__Paraprevotella_unclassified		0.143087		B-329	c__Negativicuteso__Selenomonadalesf__Veillonellaceaeg__Veillonellas__Veillonella_parvula		0.0858896			B-216	c__Clostridiao__Clostridialesf__Clostridiaceaeg__Clostridiums__Clostridium_clostridioforme	0.111415		B-90	c__Bacteroidiao__Bacteroidalesf__Porphyromonadaceaeg__Odoribacters__Odoribacter_laneus	0.117139		B-258	c__Clostridiao__Clostridialesf__Lachnospiraceaeg__Lachnospiraceae_nonames__Lachnospiraceae_bacterium_5_1_63FAA	0.0651841		B-9	c__Actinobacteriao__Bifidobacterialesf__Bifidobacteriaceaeg__Bifidobacteriums__Bifidobacterium_adolescentis	0.0968903
								B-232	c__Clostridiao__Clostridialesf__Lachnospiraceaeg__Coprococcuss__Coprococcus_comes		0.137011		B-279	c__Clostridiao__Clostridialesf__Lachnospiraceaeg__Roseburias__Roseburia_unclassified		0.0823726			B-328	c__Negativicuteso__Selenomonadalesf__Veillonellaceaeg__Veillonellas__Veillonella_dispar	0.110853		B-221	c__Clostridiao__Clostridialesf__Clostridiaceaeg__Clostridiums__Clostridium_leptum	0.112396		B-331	c__Negativicuteso__Selenomonadalesf__Veillonellaceaeg__Veillonellas__Veillonella_unclassified	0.0646169		B-254	c__Clostridiao__Clostridialesf__Lachnospiraceaeg__Lachnospiraceae_nonames__Lachnospiraceae_bacterium_3_1_46FAA	0.0962195
								B-45	c__Bacteroidiao__Bacteroidalesf__Rikenellaceaeg__Alistipess__Alistipes_indistinctus		0.136769		B-264	c__Clostridiao__Clostridialesf__Oscillospiraceaeg__Oscillibacters__Oscillibacter_sp_KLE_1728		0.0789404			B-342	c__Betaproteobacteriao__Burkholderialesf__Sutterellaceaeg__Parasutterellas__Parasutterella_excrementihominis	0.109085		B-235	c__Clostridiao__Clostridialesf__Lachnospiraceaeg__Doreas__Dorea_formicigenerans	0.110415		B-196	c__Clostridiao__Clostridialesf__Lachnospiraceaeg__Anaerostipess__Anaerostipes_hadrus	0.0641318		B-261	c__Clostridiao__Clostridialesf__Lachnospiraceaeg__Lachnospiraceae_nonames__Lachnospiraceae_bacterium_8_1_57FAA	0.0950271
								B-324	c__Negativicuteso__Selenomonadalesf__Veillonellaceaeg__Megasphaeras__Megasphaera_unclassified		0.131742		B-86	c__Bacteroidiao__Bacteroidalesf__Porphyromonadaceaeg__Coprobacters__Coprobacter_fastidiosus		0.0691459			B-323	c__Negativicuteso__Selenomonadalesf__Veillonellaceaeg__Megasphaeras__Megasphaera_micronuciformis	0.100524		B-95	c__Bacteroidiao__Bacteroidalesf__Porphyromonadaceaeg__Parabacteroidess__Parabacteroides_johnsonii	0.109403		B-364	c__Gammaproteobacteriao__Enterobacterialesf__Enterobacteriaceaeg__Escherichias__Escherichia_unclassified	0.0567631		B-329	c__Negativicuteso__Selenomonadalesf__Veillonellaceaeg__Veillonellas__Veillonella_parvula	0.0800036
								B-77	c__Bacteroidiao__Bacteroidalesf__Bacteroidaceaeg__Bacteroidess__Bacteroides_sp_2_1_22		0.129745		B-253	c__Clostridiao__Clostridialesf__Lachnospiraceaeg__Lachnospiraceae_nonames__Lachnospiraceae_bacterium_2_1_58FAA		0.0672559			B-254	c__Clostridiao__Clostridialesf__Lachnospiraceaeg__Lachnospiraceae_nonames__Lachnospiraceae_bacterium_3_1_46FAA	0.10019		B-287	c__Clostridiao__Clostridialesf__Ruminococcaceaeg__Ruminococcuss__Ruminococcus_lactaris	0.109222		B-100	c__Bacteroidiao__Bacteroidalesf__Prevotellaceaeg__Paraprevotellas__Paraprevotella_clara	0.0553797		B-291	c__Clostridiao__Clostridialesf__Ruminococcaceaeg__Subdoligranulums__Subdoligranulum_sp_4_3_54A2FAA	0.0778362
								B-372	c__Gammaproteobacteriao__Enterobacterialesf__Enterobacteriaceaeg__Klebsiellas__Klebsiella_oxytoca		0.129485		B-212	c__Clostridiao__Clostridialesf__Peptostreptococcaceaeg__Peptostreptococcaceae_nonames__Clostridium_bartlettii		0.0661946			B-94	c__Bacteroidiao__Bacteroidalesf__Porphyromonadaceaeg__Parabacteroidess__Parabacteroides_goldsteinii	0.092147		B-21	c__Actinobacteriao__Coriobacterialesf__Coriobacteriaceaeg__Collinsellas__Collinsella_aerofaciens	0.106112		B-94	c__Bacteroidiao__Bacteroidalesf__Porphyromonadaceaeg__Parabacteroidess__Parabacteroides_goldsteinii	0.0541496		B-235	c__Clostridiao__Clostridialesf__Lachnospiraceaeg__Doreas__Dorea_formicigenerans	0.0778187
								B-288	c__Clostridiao__Clostridialesf__Lachnospiraceaeg__Blautias__Ruminococcus_obeum		0.126941		B-100	c__Bacteroidiao__Bacteroidalesf__Prevotellaceaeg__Paraprevotellas__Paraprevotella_clara		0.062666			B-235	c__Clostridiao__Clostridialesf__Lachnospiraceaeg__Doreas__Dorea_formicigenerans	0.077603		B-213	c__Clostridiao__Clostridialesf__Clostridiaceaeg__Clostridiums__Clostridium_bolteae	0.103326		B-344	c__Deltaproteobacteriao__Desulfovibrionalesf__Desulfovibrionaceaeg__Bilophilas__Bilophila_unclassified	0.0519932		B-369	c__Gammaproteobacteriao__Pasteurellalesf__Pasteurellaceaeg__Haemophiluss__Haemophilus_pittmaniae	0.0746374
								B-345	c__Deltaproteobacteriao__Desulfovibrionalesf__Desulfovibrionaceaeg__Bilophilas__Bilophila_wadsworthia		0.120409		B-198	c__Clostridiao__Clostridialesf__Ruminococcaceaeg__Anaerotruncuss__Anaerotruncus_colihominis		0.0618396			B-279	c__Clostridiao__Clostridialesf__Lachnospiraceaeg__Roseburias__Roseburia_unclassified	0.0732893		B-56	c__Bacteroidiao__Bacteroidalesf__Bacteroidaceaeg__Bacteroidess__Bacteroides_barnesiae	0.103319		B-327	c__Negativicuteso__Selenomonadalesf__Veillonellaceaeg__Veillonellas__Veillonella_atypica	0.0485181		B-322	c__Negativicuteso__Selenomonadalesf__Veillonellaceaeg__Megamonass__Megamonas_unclassified	0.0713966
								B-62	c__Bacteroidiao__Bacteroidalesf__Bacteroidaceaeg__Bacteroidess__Bacteroides_eggerthii		0.120129		B-216	c__Clostridiao__Clostridialesf__Clostridiaceaeg__Clostridiums__Clostridium_clostridioforme		0.0589565			B-240	c__Clostridiao__Clostridialesf__Eubacteriaceaeg__Eubacteriums__Eubacterium_hallii	0.0688068		B-16	c__Actinobacteriao__Bifidobacterialesf__Bifidobacteriaceaeg__Bifidobacteriums__Bifidobacterium_longum	0.0982781		B-58	c__Bacteroidiao__Bacteroidalesf__Bacteroidaceaeg__Bacteroidess__Bacteroides_cellulosilyticus	0.0478518		B-79	c__Bacteroidiao__Bacteroidalesf__Bacteroidaceaeg__Bacteroidess__Bacteroides_sp_4_3_47FAA	0.0707986
								B-276	c__Clostridiao__Clostridialesf__Lachnospiraceaeg__Roseburias__Roseburia_hominis		0.118299		B-255	c__Clostridiao__Clostridialesf__Lachnospiraceaeg__Lachnospiraceae_nonames__Lachnospiraceae_bacterium_3_1_57FAA_CT1		0.0581412			B-12	c__Actinobacteriao__Bifidobacterialesf__Bifidobacteriaceaeg__Bifidobacteriums__Bifidobacterium_bifidum	0.0679755		B-231	c__Clostridiao__Clostridialesf__Lachnospiraceaeg__Coprococcuss__Coprococcus_catus	0.0855708		B-261	c__Clostridiao__Clostridialesf__Lachnospiraceaeg__Lachnospiraceae_nonames__Lachnospiraceae_bacterium_8_1_57FAA	0.047689		B-250	c__Clostridiao__Clostridialesf__Lachnospiraceaeg__Lachnospiraceae_nonames__Lachnospiraceae_bacterium_1_1_57FAA	0.0703871
								B-236	c__Clostridiao__Clostridialesf__Lachnospiraceaeg__Doreas__Dorea_longicatena		0.113591		B-95	c__Bacteroidiao__Bacteroidalesf__Porphyromonadaceaeg__Parabacteroidess__Parabacteroides_johnsonii		0.055012			B-63	c__Bacteroidiao__Bacteroidalesf__Bacteroidaceaeg__Bacteroidess__Bacteroides_faecis	0.0648825		B-200	c__Clostridiao__Clostridialesf__Clostridiales_nonameg__Clostridiales_nonames__Bacteroides_pectinophilus	0.0852233		B-329	c__Negativicuteso__Selenomonadalesf__Veillonellaceaeg__Veillonellas__Veillonella_parvula	0.0464503		B-265	c__Clostridiao__Clostridialesf__Oscillospiraceaeg__Oscillibacters__Oscillibacter_sp_KLE_1745	0.0696334
								B-344	c__Deltaproteobacteriao__Desulfovibrionalesf__Desulfovibrionaceaeg__Bilophilas__Bilophila_unclassified		0.11302		B-21	c__Actinobacteriao__Coriobacterialesf__Coriobacteriaceaeg__Collinsellas__Collinsella_aerofaciens		0.0548772			B-234	c__Clostridiao__Clostridialesf__Lachnospiraceaeg__Coprococcuss__Coprococcus_sp_ART55_1	0.0640559		B-329	c__Negativicuteso__Selenomonadalesf__Veillonellaceaeg__Veillonellas__Veillonella_parvula	0.0756985		B-211	c__Clostridiao__Clostridialesf__Clostridiaceaeg__Clostridiums__Clostridium_asparagiforme	0.0455984		B-279	c__Clostridiao__Clostridialesf__Lachnospiraceaeg__Roseburias__Roseburia_unclassified	0.060626
								B-221	c__Clostridiao__Clostridialesf__Clostridiaceaeg__Clostridiums__Clostridium_leptum		0.111688		B-70	c__Bacteroidiao__Bacteroidalesf__Bacteroidaceaeg__Bacteroidess__Bacteroides_nordii		0.0542579			B-50	c__Bacteroidiao__Bacteroidalesf__Rikenellaceaeg__Alistipess__Alistipes_sp_AP11	0.0610301		B-12	c__Actinobacteriao__Bifidobacterialesf__Bifidobacteriaceaeg__Bifidobacteriums__Bifidobacterium_bifidum	0.0693733		B-185	c__Bacillio__Lactobacillalesf__Streptococcaceaeg__Streptococcuss__Streptococcus_salivarius	0.0429438		B-258	c__Clostridiao__Clostridialesf__Lachnospiraceaeg__Lachnospiraceae_nonames__Lachnospiraceae_bacterium_5_1_63FAA	0.0602458
								B-289	c__Clostridiao__Clostridialesf__Ruminococcaceaeg__Ruminococcuss__Ruminococcus_sp_5_1_39BFAA		0.106902		B-258	c__Clostridiao__Clostridialesf__Lachnospiraceaeg__Lachnospiraceae_nonames__Lachnospiraceae_bacterium_5_1_63FAA		0.0534708			B-264	c__Clostridiao__Clostridialesf__Oscillospiraceaeg__Oscillibacters__Oscillibacter_sp_KLE_1728	0.0602838		B-326	c__Negativicuteso__Selenomonadalesf__Acidaminococcaceaeg__Phascolarctobacteriums__Phascolarctobacterium_succinatutens	0.0651681		B-320	c__Negativicuteso__Selenomonadalesf__Veillonellaceaeg__Megamonass__Megamonas_hypermegale	0.042725		B-232	c__Clostridiao__Clostridialesf__Lachnospiraceaeg__Coprococcuss__Coprococcus_comes	0.0573614
								B-240	c__Clostridiao__Clostridialesf__Eubacteriaceaeg__Eubacteriums__Eubacterium_hallii		0.102165		B-337	c__Betaproteobacteriao__Burkholderialesf__Burkholderiales_nonameg__Burkholderiales_nonames__Burkholderiales_bacterium_1_1_47		0.0460214			B-288	c__Clostridiao__Clostridialesf__Lachnospiraceaeg__Blautias__Ruminococcus_obeum	0.0563299		B-264	c__Clostridiao__Clostridialesf__Oscillospiraceaeg__Oscillibacters__Oscillibacter_sp_KLE_1728	0.0626966		B-222	c__Clostridiao__Clostridialesf__Clostridiaceaeg__Clostridiums__Clostridium_nexile	0.0422354		B-245	c__Clostridiao__Clostridialesf__Eubacteriaceaeg__Eubacteriums__Eubacterium_sp_3_1_31	0.054761
								B-287	c__Clostridiao__Clostridialesf__Ruminococcaceaeg__Ruminococcuss__Ruminococcus_lactaris		0.0978526		B-12	c__Actinobacteriao__Bifidobacterialesf__Bifidobacteriaceaeg__Bifidobacteriums__Bifidobacterium_bifidum		0.0458696			B-314	c__Negativicuteso__Selenomonadalesf__Acidaminococcaceaeg__Acidaminococcuss__Acidaminococcus_intestini	0.0530193		B-242	c__Clostridiao__Clostridialesf__Eubacteriaceaeg__Eubacteriums__Eubacterium_ramulus	0.0608432		B-182	c__Bacillio__Lactobacillalesf__Streptococcaceaeg__Streptococcuss__Streptococcus_parasanguinis	0.0421562		B-343	c__Betaproteobacteriao__Burkholderialesf__Sutterellaceaeg__Sutterellas__Sutterella_wadsworthensis	0.0540563
								B-235	c__Clostridiao__Clostridialesf__Lachnospiraceaeg__Doreas__Dorea_formicigenerans		0.0925548		B-99	c__Bacteroidiao__Bacteroidalesf__Porphyromonadaceaeg__Parabacteroidess__Parabacteroides_unclassified		0.0447545			B-364	c__Gammaproteobacteriao__Enterobacterialesf__Enterobacteriaceaeg__Escherichias__Escherichia_unclassified	0.0515497		B-265	c__Clostridiao__Clostridialesf__Oscillospiraceaeg__Oscillibacters__Oscillibacter_sp_KLE_1745	0.0581805		B-221	c__Clostridiao__Clostridialesf__Clostridiaceaeg__Clostridiums__Clostridium_leptum	0.0397154		B-212	c__Clostridiao__Clostridialesf__Peptostreptococcaceaeg__Peptostreptococcaceae_nonames__Clostridium_bartlettii	0.0486782
								B-21	c__Actinobacteriao__Coriobacterialesf__Coriobacteriaceaeg__Collinsellas__Collinsella_aerofaciens		0.0905276		B-246	c__Clostridiao__Clostridialesf__Eubacteriaceaeg__Eubacteriums__Eubacterium_ventriosum		0.0415539			B-198	c__Clostridiao__Clostridialesf__Ruminococcaceaeg__Anaerotruncuss__Anaerotruncus_colihominis	0.0508995		B-250	c__Clostridiao__Clostridialesf__Lachnospiraceaeg__Lachnospiraceae_nonames__Lachnospiraceae_bacterium_1_1_57FAA	0.0568627		B-237	c__Clostridiao__Clostridialesf__Lachnospiraceaeg__Doreas__Dorea_unclassified	0.0395161		B-242	c__Clostridiao__Clostridialesf__Eubacteriaceaeg__Eubacteriums__Eubacterium_ramulus	0.0485583
								B-59	c__Bacteroidiao__Bacteroidalesf__Bacteroidaceaeg__Bacteroidess__Bacteroides_clarus		0.0899416		B-309	c__Erysipelotrichiao__Erysipelotrichalesf__Erysipelotrichaceaeg__Holdemanias__Holdemania_filiformis		0.0414794			B-187	c__Bacillio__Lactobacillalesf__Streptococcaceaeg__Streptococcuss__Streptococcus_thermophilus	0.0504323		B-76	c__Bacteroidiao__Bacteroidalesf__Bacteroidaceaeg__Bacteroidess__Bacteroides_sp_1_1_6	0.0534833		B-246	c__Clostridiao__Clostridialesf__Eubacteriaceaeg__Eubacteriums__Eubacterium_ventriosum	0.0353198		B-196	c__Clostridiao__Clostridialesf__Lachnospiraceaeg__Anaerostipess__Anaerostipes_hadrus	0.047195
								B-264	c__Clostridiao__Clostridialesf__Oscillospiraceaeg__Oscillibacters__Oscillibacter_sp_KLE_1728		0.088081		B-250	c__Clostridiao__Clostridialesf__Lachnospiraceaeg__Lachnospiraceae_nonames__Lachnospiraceae_bacterium_1_1_57FAA		0.0412748			B-250	c__Clostridiao__Clostridialesf__Lachnospiraceaeg__Lachnospiraceae_nonames__Lachnospiraceae_bacterium_1_1_57FAA	0.0503993		B-219	c__Clostridiao__Clostridialesf__Clostridiaceaeg__Clostridiums__Clostridium_hathewayi	0.0520149		B-79	c__Bacteroidiao__Bacteroidalesf__Bacteroidaceaeg__Bacteroidess__Bacteroides_sp_4_3_47FAA	0.0332362		B-211	c__Clostridiao__Clostridialesf__Clostridiaceaeg__Clostridiums__Clostridium_asparagiforme	0.0463661
								B-280	c__Clostridiao__Clostridialesf__Ruminococcaceaeg__Ruminococcaceae_nonames__Ruminococcaceae_bacterium_D16		0.0861097		B-345	c__Deltaproteobacteriao__Desulfovibrionalesf__Desulfovibrionaceaeg__Bilophilas__Bilophila_wadsworthia		0.0372856			B-260	c__Clostridiao__Clostridialesf__Lachnospiraceaeg__Lachnospiraceae_nonames__Lachnospiraceae_bacterium_7_1_58FAA	0.0491709		B-337	c__Betaproteobacteriao__Burkholderialesf__Burkholderiales_nonameg__Burkholderiales_nonames__Burkholderiales_bacterium_1_1_47	0.0504402		B-14	c__Actinobacteriao__Bifidobacterialesf__Bifidobacteriaceaeg__Bifidobacteriums__Bifidobacterium_catenulatum	0.0302578		B-296	c__Erysipelotrichiao__Erysipelotrichalesf__Erysipelotrichaceaeg__Erysipelotrichaceae_nonames__Clostridium_ramosum	0.0451081
								B-230	c__Clostridiao__Clostridialesf__Clostridiaceaeg__Clostridiums__Clostridium_symbiosum		0.0781475		B-209	c__Clostridiao__Clostridialesf__Clostridiales_nonameg__Clostridiales_nonames__Clostridiales_bacterium_1_7_47FAA		0.0363396			B-21	c__Actinobacteriao__Coriobacterialesf__Coriobacteriaceaeg__Collinsellas__Collinsella_aerofaciens	0.0489326		B-261	c__Clostridiao__Clostridialesf__Lachnospiraceaeg__Lachnospiraceae_nonames__Lachnospiraceae_bacterium_8_1_57FAA	0.0447059		B-319	c__Negativicuteso__Selenomonadalesf__Veillonellaceaeg__Megamonass__Megamonas_funiformis	0.030215		B-86	c__Bacteroidiao__Bacteroidalesf__Porphyromonadaceaeg__Coprobacters__Coprobacter_fastidiosus	0.0440739
								B-55	c__Bacteroidiao__Bacteroidalesf__Bacteroidales_nonameg__Bacteroidales_nonames__Bacteroidales_bacterium_ph8		0.0775181		B-71	c__Bacteroidiao__Bacteroidalesf__Bacteroidaceaeg__Bacteroidess__Bacteroides_oleiciplenus		0.0360513			B-13	c__Actinobacteriao__Bifidobacterialesf__Bifidobacteriaceaeg__Bifidobacteriums__Bifidobacterium_breve	0.0472903		B-249	c__Clostridiao__Clostridialesf__Clostridiales_nonameg__Flavonifractors__Flavonifractor_plautii	0.0419324		B-208	c__Clostridiao__Clostridialesf__Clostridiaceaeg__Clostridiaceae_nonames__Clostridiaceae_bacterium_JC118	0.0289576		B-204	c__Clostridiao__Clostridialesf__Clostridiaceaeg__Butyricicoccuss__Butyricicoccus_pullicaecorum	0.0412417
								B-364	c__Gammaproteobacteriao__Enterobacterialesf__Enterobacteriaceaeg__Escherichias__Escherichia_unclassified		0.0772189		B-68	c__Bacteroidiao__Bacteroidalesf__Bacteroidaceaeg__Bacteroidess__Bacteroides_intestinalis		0.0328446			B-345	c__Deltaproteobacteriao__Desulfovibrionalesf__Desulfovibrionaceaeg__Bilophilas__Bilophila_wadsworthia	0.0471371		B-372	c__Gammaproteobacteriao__Enterobacterialesf__Enterobacteriaceaeg__Klebsiellas__Klebsiella_oxytoca	0.0413055		B-300	c__Erysipelotrichiao__Erysipelotrichalesf__Erysipelotrichaceaeg__Coprobacilluss__Coprobacillus_unclassified	0.0288886		B-225	c__Clostridiao__Clostridialesf__Clostridiaceaeg__Clostridiums__Clostridium_sp_ATCC_BAA_442	0.0409512
								B-242	c__Clostridiao__Clostridialesf__Eubacteriaceaeg__Eubacteriums__Eubacterium_ramulus		0.0758793		B-283	c__Clostridiao__Clostridialesf__Ruminococcaceaeg__Ruminococcuss__Ruminococcus_callidus		0.0306958			B-294	c__Erysipelotrichiao__Erysipelotrichalesf__Erysipelotrichaceaeg__Catenibacteriums__Catenibacterium_mitsuokai	0.0467623		B-45	c__Bacteroidiao__Bacteroidalesf__Rikenellaceaeg__Alistipess__Alistipes_indistinctus	0.0384616		B-330	c__Negativicuteso__Selenomonadalesf__Veillonellaceaeg__Veillonellas__Veillonella_ratti	0.0285804		B-342	c__Betaproteobacteriao__Burkholderialesf__Sutterellaceaeg__Parasutterellas__Parasutterella_excrementihominis	0.03985
								B-98	c__Bacteroidiao__Bacteroidalesf__Porphyromonadaceaeg__Parabacteroidess__Parabacteroides_sp_D13		0.0758544		B-310	c__Erysipelotrichiao__Erysipelotrichalesf__Erysipelotrichaceaeg__Holdemanias__Holdemania_unclassified		0.0300293			B-309	c__Erysipelotrichiao__Erysipelotrichalesf__Erysipelotrichaceaeg__Holdemanias__Holdemania_filiformis	0.0465546		B-260	c__Clostridiao__Clostridialesf__Lachnospiraceaeg__Lachnospiraceae_nonames__Lachnospiraceae_bacterium_7_1_58FAA	0.0375025		B-309	c__Erysipelotrichiao__Erysipelotrichalesf__Erysipelotrichaceaeg__Holdemanias__Holdemania_filiformis	0.027596		B-95	c__Bacteroidiao__Bacteroidalesf__Porphyromonadaceaeg__Parabacteroidess__Parabacteroides_johnsonii	0.0395508
								B-250	c__Clostridiao__Clostridialesf__Lachnospiraceaeg__Lachnospiraceae_nonames__Lachnospiraceae_bacterium_1_1_57FAA		0.0705711		B-45	c__Bacteroidiao__Bacteroidalesf__Rikenellaceaeg__Alistipess__Alistipes_indistinctus		0.0286478			B-280	c__Clostridiao__Clostridialesf__Ruminococcaceaeg__Ruminococcaceae_nonames__Ruminococcaceae_bacterium_D16	0.0437711		B-373	c__Gammaproteobacteriao__Enterobacterialesf__Enterobacteriaceaeg__Klebsiellas__Klebsiella_pneumoniae	0.0369523		B-50	c__Bacteroidiao__Bacteroidalesf__Rikenellaceaeg__Alistipess__Alistipes_sp_AP11	0.0272893		B-14	c__Actinobacteriao__Bifidobacterialesf__Bifidobacteriaceaeg__Bifidobacteriums__Bifidobacterium_catenulatum	0.0390275
								B-182	c__Bacillio__Lactobacillalesf__Streptococcaceaeg__Streptococcuss__Streptococcus_parasanguinis		0.0679691		B-378	c__Gammaproteobacteriao__Enterobacterialesf__Enterobacteriaceaeg__Proteuss__Proteus_mirabilis		0.0268722			B-300	c__Erysipelotrichiao__Erysipelotrichalesf__Erysipelotrichaceaeg__Coprobacilluss__Coprobacillus_unclassified	0.0426313		B-225	c__Clostridiao__Clostridialesf__Clostridiaceaeg__Clostridiums__Clostridium_sp_ATCC_BAA_442	0.0364533		B-231	c__Clostridiao__Clostridialesf__Lachnospiraceaeg__Coprococcuss__Coprococcus_catus	0.0242849		B-76	c__Bacteroidiao__Bacteroidalesf__Bacteroidaceaeg__Bacteroidess__Bacteroides_sp_1_1_6	0.0388461
								B-209	c__Clostridiao__Clostridialesf__Clostridiales_nonameg__Clostridiales_nonames__Clostridiales_bacterium_1_7_47FAA		0.0653585		B-373	c__Gammaproteobacteriao__Enterobacterialesf__Enterobacteriaceaeg__Klebsiellas__Klebsiella_pneumoniae		0.026452			B-297	c__Erysipelotrichiao__Erysipelotrichalesf__Erysipelotrichaceaeg__Erysipelotrichaceae_nonames__Clostridium_spiroforme	0.0424659		B-286	c__Clostridiao__Clostridialesf__Lachnospiraceaeg__Blautias__Ruminococcus_gnavus	0.0356211		B-209	c__Clostridiao__Clostridialesf__Clostridiales_nonameg__Clostridiales_nonames__Clostridiales_bacterium_1_7_47FAA	0.0240012		B-101	c__Bacteroidiao__Bacteroidalesf__Prevotellaceaeg__Paraprevotellas__Paraprevotella_unclassified	0.0384175
								B-265	c__Clostridiao__Clostridialesf__Oscillospiraceaeg__Oscillibacters__Oscillibacter_sp_KLE_1745		0.0651362		B-185	c__Bacillio__Lactobacillalesf__Streptococcaceaeg__Streptococcuss__Streptococcus_salivarius		0.0254773			B-70	c__Bacteroidiao__Bacteroidalesf__Bacteroidaceaeg__Bacteroidess__Bacteroides_nordii	0.0421318		B-306	c__Erysipelotrichiao__Erysipelotrichalesf__Erysipelotrichaceaeg__Erysipelotrichaceae_nonames__Eubacterium_biforme	0.034782		B-271	c__Clostridiao__Clostridialesf__Peptostreptococcaceaeg__Peptostreptococcaceae_nonames__Peptostreptococcaceae_noname_unclassified	0.0232069		B-364	c__Gammaproteobacteriao__Enterobacterialesf__Enterobacteriaceaeg__Escherichias__Escherichia_unclassified	0.0382982
								B-12	c__Actinobacteriao__Bifidobacterialesf__Bifidobacteriaceaeg__Bifidobacteriums__Bifidobacterium_bifidum		0.0643265		B-297	c__Erysipelotrichiao__Erysipelotrichalesf__Erysipelotrichaceaeg__Erysipelotrichaceae_nonames__Clostridium_spiroforme		0.0251487			B-100	c__Bacteroidiao__Bacteroidalesf__Prevotellaceaeg__Paraprevotellas__Paraprevotella_clara	0.0406567		B-258	c__Clostridiao__Clostridialesf__Lachnospiraceaeg__Lachnospiraceae_nonames__Lachnospiraceae_bacterium_5_1_63FAA	0.0342283		B-324	c__Negativicuteso__Selenomonadalesf__Veillonellaceaeg__Megasphaeras__Megasphaera_unclassified	0.0229224		B-197	c__Clostridiao__Clostridialesf__Lachnospiraceaeg__Anaerostipess__Anaerostipes_unclassified	0.0376121
								B-134	c__Bacillio__Lactobacillalesf__Enterococcaceaeg__Enterococcuss__Enterococcus_faecium		0.0641034		B-211	c__Clostridiao__Clostridialesf__Clostridiaceaeg__Clostridiums__Clostridium_asparagiforme		0.0250901			B-95	c__Bacteroidiao__Bacteroidalesf__Porphyromonadaceaeg__Parabacteroidess__Parabacteroides_johnsonii	0.0397782		B-50	c__Bacteroidiao__Bacteroidalesf__Rikenellaceaeg__Alistipess__Alistipes_sp_AP11	0.0340178		B-242	c__Clostridiao__Clostridialesf__Eubacteriaceaeg__Eubacteriums__Eubacterium_ramulus	0.0205184		B-328	c__Negativicuteso__Selenomonadalesf__Veillonellaceaeg__Veillonellas__Veillonella_dispar	0.0360687
								B-296	c__Erysipelotrichiao__Erysipelotrichalesf__Erysipelotrichaceaeg__Erysipelotrichaceae_nonames__Clostridium_ramosum		0.0586179		B-291	c__Clostridiao__Clostridialesf__Ruminococcaceaeg__Subdoligranulums__Subdoligranulum_sp_4_3_54A2FAA		0.0246447			B-212	c__Clostridiao__Clostridialesf__Peptostreptococcaceaeg__Peptostreptococcaceae_nonames__Clostridium_bartlettii	0.0363254		B-222	c__Clostridiao__Clostridialesf__Clostridiaceaeg__Clostridiums__Clostridium_nexile	0.0329755		B-102	c__Bacteroidiao__Bacteroidalesf__Prevotellaceaeg__Paraprevotellas__Paraprevotella_xylaniphila	0.0195924		B-345	c__Deltaproteobacteriao__Desulfovibrionalesf__Desulfovibrionaceaeg__Bilophilas__Bilophila_wadsworthia	0.035969
								B-259	c__Clostridiao__Clostridialesf__Lachnospiraceaeg__Lachnospiraceae_nonames__Lachnospiraceae_bacterium_6_1_63FAA		0.0582086		B-328	c__Negativicuteso__Selenomonadalesf__Veillonellaceaeg__Veillonellas__Veillonella_dispar		0.0237845			B-255	c__Clostridiao__Clostridialesf__Lachnospiraceaeg__Lachnospiraceae_nonames__Lachnospiraceae_bacterium_3_1_57FAA_CT1	0.0344979		B-322	c__Negativicuteso__Selenomonadalesf__Veillonellaceaeg__Megamonass__Megamonas_unclassified	0.032438		B-17	c__Actinobacteriao__Bifidobacterialesf__Bifidobacteriaceaeg__Bifidobacteriums__Bifidobacterium_pseudocatenulatum	0.0193984		B-280	c__Clostridiao__Clostridialesf__Ruminococcaceaeg__Ruminococcaceae_nonames__Ruminococcaceae_bacterium_D16	0.0355546
								B-294	c__Erysipelotrichiao__Erysipelotrichalesf__Erysipelotrichaceaeg__Catenibacteriums__Catenibacterium_mitsuokai		0.0562614		B-327	c__Negativicuteso__Selenomonadalesf__Veillonellaceaeg__Veillonellas__Veillonella_atypica		0.0235347			B-209	c__Clostridiao__Clostridialesf__Clostridiales_nonameg__Clostridiales_nonames__Clostridiales_bacterium_1_7_47FAA	0.0337164		B-196	c__Clostridiao__Clostridialesf__Lachnospiraceaeg__Anaerostipess__Anaerostipes_hadrus	0.0315218		B-283	c__Clostridiao__Clostridialesf__Ruminococcaceaeg__Ruminococcuss__Ruminococcus_callidus	0.0191919		B-327	c__Negativicuteso__Selenomonadalesf__Veillonellaceaeg__Veillonellas__Veillonella_atypica	0.0354163
								B-212	c__Clostridiao__Clostridialesf__Peptostreptococcaceaeg__Peptostreptococcaceae_nonames__Clostridium_bartlettii		0.0548429		B-231	c__Clostridiao__Clostridialesf__Lachnospiraceaeg__Coprococcuss__Coprococcus_catus		0.0211421			B-265	c__Clostridiao__Clostridialesf__Oscillospiraceaeg__Oscillibacters__Oscillibacter_sp_KLE_1745	0.0322699		B-280	c__Clostridiao__Clostridialesf__Ruminococcaceaeg__Ruminococcaceae_nonames__Ruminococcaceae_bacterium_D16	0.0304673		B-10	c__Actinobacteriao__Bifidobacterialesf__Bifidobacteriaceaeg__Bifidobacteriums__Bifidobacterium_animalis	0.014517		B-203	c__Clostridiao__Clostridialesf__Lachnospiraceaeg__Blautias__Blautia_producta	0.0352078
								B-335	c__Fusobacteriiao__Fusobacterialesf__Fusobacteriaceaeg__Fusobacteriums__Fusobacterium_ulcerans		0.0526357		B-29	c__Actinobacteriao__Coriobacterialesf__Coriobacteriaceaeg__Eggerthellas__Eggerthella_unclassified		0.0203328			B-232	c__Clostridiao__Clostridialesf__Lachnospiraceaeg__Coprococcuss__Coprococcus_comes	0.0322341		B-324	c__Negativicuteso__Selenomonadalesf__Veillonellaceaeg__Megasphaeras__Megasphaera_unclassified	0.0304516		B-265	c__Clostridiao__Clostridialesf__Oscillospiraceaeg__Oscillibacters__Oscillibacter_sp_KLE_1745	0.0139825		B-253	c__Clostridiao__Clostridialesf__Lachnospiraceaeg__Lachnospiraceae_nonames__Lachnospiraceae_bacterium_2_1_58FAA	0.0342062
								B-100	c__Bacteroidiao__Bacteroidalesf__Prevotellaceaeg__Paraprevotellas__Paraprevotella_clara		0.0522044		B-14	c__Actinobacteriao__Bifidobacterialesf__Bifidobacteriaceaeg__Bifidobacteriums__Bifidobacterium_catenulatum		0.0195538			B-185	c__Bacillio__Lactobacillalesf__Streptococcaceaeg__Streptococcuss__Streptococcus_salivarius	0.0313499		B-284	c__Clostridiao__Clostridialesf__Ruminococcaceaeg__Ruminococcuss__Ruminococcus_champanellensis	0.0288647		B-216	c__Clostridiao__Clostridialesf__Clostridiaceaeg__Clostridiums__Clostridium_clostridioforme	0.0136737		B-314	c__Negativicuteso__Selenomonadalesf__Acidaminococcaceaeg__Acidaminococcuss__Acidaminococcus_intestini	0.0340261
								B-225	c__Clostridiao__Clostridialesf__Clostridiaceaeg__Clostridiums__Clostridium_sp_ATCC_BAA_442		0.0519209		B-64	c__Bacteroidiao__Bacteroidalesf__Bacteroidaceaeg__Bacteroidess__Bacteroides_finegoldii		0.0169985			B-289	c__Clostridiao__Clostridialesf__Ruminococcaceaeg__Ruminococcuss__Ruminococcus_sp_5_1_39BFAA	0.0294303		B-185	c__Bacillio__Lactobacillalesf__Streptococcaceaeg__Streptococcuss__Streptococcus_salivarius	0.0268583		B-55	c__Bacteroidiao__Bacteroidalesf__Bacteroidales_nonameg__Bacteroidales_nonames__Bacteroidales_bacterium_ph8	0.013662		B-102	c__Bacteroidiao__Bacteroidalesf__Prevotellaceaeg__Paraprevotellas__Paraprevotella_xylaniphila	0.0335789
								B-261	c__Clostridiao__Clostridialesf__Lachnospiraceaeg__Lachnospiraceae_nonames__Lachnospiraceae_bacterium_8_1_57FAA		0.0514658		B-215	c__Clostridiao__Clostridialesf__Clostridiaceaeg__Clostridiums__Clostridium_citroniae		0.0166913			B-182	c__Bacillio__Lactobacillalesf__Streptococcaceaeg__Streptococcuss__Streptococcus_parasanguinis	0.029348		B-342	c__Betaproteobacteriao__Burkholderialesf__Sutterellaceaeg__Parasutterellas__Parasutterella_excrementihominis	0.0262371		B-105	c__Bacteroidiao__Bacteroidalesf__Porphyromonadaceaeg__Porphyromonass__Porphyromonas_endodontalis	0.0125286		B-12	c__Actinobacteriao__Bifidobacterialesf__Bifidobacteriaceaeg__Bifidobacteriums__Bifidobacterium_bifidum	0.0326282
								B-260	c__Clostridiao__Clostridialesf__Lachnospiraceaeg__Lachnospiraceae_nonames__Lachnospiraceae_bacterium_7_1_58FAA		0.0497656		B-182	c__Bacillio__Lactobacillalesf__Streptococcaceaeg__Streptococcuss__Streptococcus_parasanguinis		0.0165975			B-45	c__Bacteroidiao__Bacteroidalesf__Rikenellaceaeg__Alistipess__Alistipes_indistinctus	0.0275916		B-255	c__Clostridiao__Clostridialesf__Lachnospiraceaeg__Lachnospiraceae_nonames__Lachnospiraceae_bacterium_3_1_57FAA_CT1	0.024231		B-29	c__Actinobacteriao__Coriobacterialesf__Coriobacteriaceaeg__Eggerthellas__Eggerthella_unclassified	0.0122952		B-272	c__Clostridiao__Clostridialesf__Peptostreptococcaceaeg__Peptostreptococcuss__Peptostreptococcus_anaerobius	0.0283337
								B-74	c__Bacteroidiao__Bacteroidalesf__Bacteroidaceaeg__Bacteroidess__Bacteroides_salyersiae		0.0494183		B-74	c__Bacteroidiao__Bacteroidalesf__Bacteroidaceaeg__Bacteroidess__Bacteroides_salyersiae		0.0161928			B-207	c__Clostridiao__Clostridialesf__Lachnospiraceaeg__Cellulosilyticums__Cellulosilyticum_lentocellum	0.0275227		B-48	c__Bacteroidiao__Bacteroidalesf__Rikenellaceaeg__Alistipess__Alistipes_senegalensis	0.0229076		B-253	c__Clostridiao__Clostridialesf__Lachnospiraceaeg__Lachnospiraceae_nonames__Lachnospiraceae_bacterium_2_1_58FAA	0.0111473		B-74	c__Bacteroidiao__Bacteroidalesf__Bacteroidaceaeg__Bacteroidess__Bacteroides_salyersiae	0.0274988
								B-185	c__Bacillio__Lactobacillalesf__Streptococcaceaeg__Streptococcuss__Streptococcus_salivarius		0.0484918		B-245	c__Clostridiao__Clostridialesf__Eubacteriaceaeg__Eubacteriums__Eubacterium_sp_3_1_31		0.0161915			B-17	c__Actinobacteriao__Bifidobacterialesf__Bifidobacteriaceaeg__Bifidobacteriums__Bifidobacterium_pseudocatenulatum	0.0267358		B-309	c__Erysipelotrichiao__Erysipelotrichalesf__Erysipelotrichaceaeg__Holdemanias__Holdemania_filiformis	0.0217235		B-212	c__Clostridiao__Clostridialesf__Peptostreptococcaceaeg__Peptostreptococcaceae_nonames__Clostridium_bartlettii	0.0106733		B-361	c__Gammaproteobacteriao__Enterobacterialesf__Enterobacteriaceaeg__Escherichias__Escherichia_albertii	0.0272453
								B-50	c__Bacteroidiao__Bacteroidalesf__Rikenellaceaeg__Alistipess__Alistipes_sp_AP11		0.0474297		B-357	c__Gammaproteobacteriao__Enterobacterialesf__Enterobacteriaceaeg__Citrobacters__Citrobacter_unclassified		0.0159583			B-258	c__Clostridiao__Clostridialesf__Lachnospiraceaeg__Lachnospiraceae_nonames__Lachnospiraceae_bacterium_5_1_63FAA	0.0258008		B-327	c__Negativicuteso__Selenomonadalesf__Veillonellaceaeg__Veillonellas__Veillonella_atypica	0.0214735		B-373	c__Gammaproteobacteriao__Enterobacterialesf__Enterobacteriaceaeg__Klebsiellas__Klebsiella_pneumoniae	0.00995768		B-231	c__Clostridiao__Clostridialesf__Lachnospiraceaeg__Coprococcuss__Coprococcus_catus	0.0269893
								B-10	c__Actinobacteriao__Bifidobacterialesf__Bifidobacteriaceaeg__Bifidobacteriums__Bifidobacterium_animalis		0.045948		B-237	c__Clostridiao__Clostridialesf__Lachnospiraceaeg__Doreas__Dorea_unclassified		0.0150689			B-291	c__Clostridiao__Clostridialesf__Ruminococcaceaeg__Subdoligranulums__Subdoligranulum_sp_4_3_54A2FAA	0.0241034		B-199	c__Clostridiao__Clostridialesf__Ruminococcaceaeg__Anaerotruncuss__Anaerotruncus_unclassified	0.0186152		B-250	c__Clostridiao__Clostridialesf__Lachnospiraceaeg__Lachnospiraceae_nonames__Lachnospiraceae_bacterium_1_1_57FAA	0.00944705		B-251	c__Clostridiao__Clostridialesf__Lachnospiraceaeg__Lachnospiraceae_nonames__Lachnospiraceae_bacterium_1_4_56FAA	0.0248688
								B-13	c__Actinobacteriao__Bifidobacterialesf__Bifidobacteriaceaeg__Bifidobacteriums__Bifidobacterium_breve		0.0459418		B-311	c__Erysipelotrichiao__Erysipelotrichalesf__Erysipelotrichaceaeg__Solobacteriums__Solobacterium_moorei		0.0150674			B-237	c__Clostridiao__Clostridialesf__Lachnospiraceaeg__Doreas__Dorea_unclassified	0.022302		B-320	c__Negativicuteso__Selenomonadalesf__Veillonellaceaeg__Megamonass__Megamonas_hypermegale	0.0167542		B-245	c__Clostridiao__Clostridialesf__Eubacteriaceaeg__Eubacteriums__Eubacterium_sp_3_1_31	0.00899375		B-100	c__Bacteroidiao__Bacteroidalesf__Prevotellaceaeg__Paraprevotellas__Paraprevotella_clara	0.0247009
								B-222	c__Clostridiao__Clostridialesf__Clostridiaceaeg__Clostridiums__Clostridium_nexile		0.0393004		B-287	c__Clostridiao__Clostridialesf__Ruminococcaceaeg__Ruminococcuss__Ruminococcus_lactaris		0.0144586			B-302	c__Erysipelotrichiao__Erysipelotrichalesf__Erysipelotrichaceaeg__Erysipelotrichaceae_nonames__Erysipelotrichaceae_bacterium_21_3	0.0218415		B-102	c__Bacteroidiao__Bacteroidalesf__Prevotellaceaeg__Paraprevotellas__Paraprevotella_xylaniphila	0.0149974		B-48	c__Bacteroidiao__Bacteroidalesf__Rikenellaceaeg__Alistipess__Alistipes_senegalensis	0.00828553		B-237	c__Clostridiao__Clostridialesf__Lachnospiraceaeg__Doreas__Dorea_unclassified	0.0222147
								B-258	c__Clostridiao__Clostridialesf__Lachnospiraceaeg__Lachnospiraceae_nonames__Lachnospiraceae_bacterium_5_1_63FAA		0.0372819		B-115	c__Bacteroidiao__Bacteroidalesf__Prevotellaceaeg__Prevotellas__Prevotella_disiens		0.0141316			B-121	c__Bacteroidiao__Bacteroidalesf__Prevotellaceaeg__Prevotellas__Prevotella_timonensis	0.0215315		B-182	c__Bacillio__Lactobacillalesf__Streptococcaceaeg__Streptococcuss__Streptococcus_parasanguinis	0.014854		B-45	c__Bacteroidiao__Bacteroidalesf__Rikenellaceaeg__Alistipess__Alistipes_indistinctus	0.00826333		B-209	c__Clostridiao__Clostridialesf__Clostridiales_nonameg__Clostridiales_nonames__Clostridiales_bacterium_1_7_47FAA	0.0220205
								B-244	c__Clostridiao__Clostridialesf__Eubacteriaceaeg__Eubacteriums__Eubacterium_siraeum		0.0363229		B-17	c__Actinobacteriao__Bifidobacterialesf__Bifidobacteriaceaeg__Bifidobacteriums__Bifidobacterium_pseudocatenulatum		0.0138548			B-271	c__Clostridiao__Clostridialesf__Peptostreptococcaceaeg__Peptostreptococcaceae_nonames__Peptostreptococcaceae_noname_unclassified	0.0212396		B-86	c__Bacteroidiao__Bacteroidalesf__Porphyromonadaceaeg__Coprobacters__Coprobacter_fastidiosus	0.0146787		B-204	c__Clostridiao__Clostridialesf__Clostridiaceaeg__Butyricicoccuss__Butyricicoccus_pullicaecorum	0.00759731		B-320	c__Negativicuteso__Selenomonadalesf__Veillonellaceaeg__Megamonass__Megamonas_hypermegale	0.0219348
								B-95	c__Bacteroidiao__Bacteroidalesf__Porphyromonadaceaeg__Parabacteroidess__Parabacteroides_johnsonii		0.03621		B-94	c__Bacteroidiao__Bacteroidalesf__Porphyromonadaceaeg__Parabacteroidess__Parabacteroides_goldsteinii		0.0136514			B-196	c__Clostridiao__Clostridialesf__Lachnospiraceaeg__Anaerostipess__Anaerostipes_hadrus	0.0198832		B-121	c__Bacteroidiao__Bacteroidalesf__Prevotellaceaeg__Prevotellas__Prevotella_timonensis	0.0144712		B-257	c__Clostridiao__Clostridialesf__Lachnospiraceaeg__Lachnospiraceae_nonames__Lachnospiraceae_bacterium_5_1_57FAA	0.00641131		B-319	c__Negativicuteso__Selenomonadalesf__Veillonellaceaeg__Megamonass__Megamonas_funiformis	0.0214511
								B-136	c__Bacillio__Lactobacillalesf__Enterococcaceaeg__Enterococcuss__Enterococcus_hirae		0.0348861		B-202	c__Clostridiao__Clostridialesf__Lachnospiraceaeg__Blautias__Blautia_hydrogenotrophica		0.0117809			B-359	c__Gammaproteobacteriao__Enterobacterialesf__Enterobacteriaceaeg__Enterobacters__Enterobacter_cloacae	0.0196471		B-328	c__Negativicuteso__Selenomonadalesf__Veillonellaceaeg__Veillonellas__Veillonella_dispar	0.0142458		B-86	c__Bacteroidiao__Bacteroidalesf__Porphyromonadaceaeg__Coprobacters__Coprobacter_fastidiosus	0.00601176		B-70	c__Bacteroidiao__Bacteroidalesf__Bacteroidaceaeg__Bacteroidess__Bacteroides_nordii	0.0209813
								B-327	c__Negativicuteso__Selenomonadalesf__Veillonellaceaeg__Veillonellas__Veillonella_atypica		0.0339042		B-208	c__Clostridiao__Clostridialesf__Clostridiaceaeg__Clostridiaceae_nonames__Clostridiaceae_bacterium_JC118		0.0117655			B-199	c__Clostridiao__Clostridialesf__Ruminococcaceaeg__Anaerotruncuss__Anaerotruncus_unclassified	0.0191629		B-291	c__Clostridiao__Clostridialesf__Ruminococcaceaeg__Subdoligranulums__Subdoligranulum_sp_4_3_54A2FAA	0.0137874		B-328	c__Negativicuteso__Selenomonadalesf__Veillonellaceaeg__Veillonellas__Veillonella_dispar	0.00529187		B-271	c__Clostridiao__Clostridialesf__Peptostreptococcaceaeg__Peptostreptococcaceae_nonames__Peptostreptococcaceae_noname_unclassified	0.0198694
								B-283	c__Clostridiao__Clostridialesf__Ruminococcaceaeg__Ruminococcuss__Ruminococcus_callidus		0.0333969		B-301	c__Erysipelotrichiao__Erysipelotrichalesf__Erysipelotrichaceaeg__Erysipelotrichaceae_nonames__Erysipelotrichaceae_bacterium_2_2_44A		0.0116602			B-283	c__Clostridiao__Clostridialesf__Ruminococcaceaeg__Ruminococcuss__Ruminococcus_callidus	0.0186502		B-364	c__Gammaproteobacteriao__Enterobacterialesf__Enterobacteriaceaeg__Escherichias__Escherichia_unclassified	0.0122232		B-333	c__Fusobacteriiao__Fusobacterialesf__Fusobacteriaceaeg__Fusobacteriums__Fusobacterium_nucleatum	0.00528003		B-255	c__Clostridiao__Clostridialesf__Lachnospiraceaeg__Lachnospiraceae_nonames__Lachnospiraceae_bacterium_3_1_57FAA_CT1	0.0194187
								B-73	c__Bacteroidiao__Bacteroidalesf__Bacteroidaceaeg__Bacteroidess__Bacteroides_plebeius		0.0312329		B-289	c__Clostridiao__Clostridialesf__Ruminococcaceaeg__Ruminococcuss__Ruminococcus_sp_5_1_39BFAA		0.01016			B-322	c__Negativicuteso__Selenomonadalesf__Veillonellaceaeg__Megamonass__Megamonas_unclassified	0.0167907		B-298	c__Erysipelotrichiao__Erysipelotrichalesf__Erysipelotrichaceaeg__Coprobacilluss__Coprobacillus_sp_29_1	0.0121077		B-219	c__Clostridiao__Clostridialesf__Clostridiaceaeg__Clostridiums__Clostridium_hathewayi	0.00496518		B-103	c__Bacteroidiao__Bacteroidalesf__Porphyromonadaceaeg__Porphyromonass__Porphyromonas_asaccharolytica	0.0187471
								B-237	c__Clostridiao__Clostridialesf__Lachnospiraceaeg__Doreas__Dorea_unclassified		0.0288853		B-300	c__Erysipelotrichiao__Erysipelotrichalesf__Erysipelotrichaceaeg__Coprobacilluss__Coprobacillus_unclassified		0.00991326			B-308	c__Erysipelotrichiao__Erysipelotrichalesf__Erysipelotrichaceaeg__Erysipelotrichaceae_nonames__Eubacterium_dolichum	0.0164092		B-345	c__Deltaproteobacteriao__Desulfovibrionalesf__Desulfovibrionaceaeg__Bilophilas__Bilophila_wadsworthia	0.0119652		B-15	c__Actinobacteriao__Bifidobacterialesf__Bifidobacteriaceaeg__Bifidobacteriums__Bifidobacterium_dentium	0.00482901		B-198	c__Clostridiao__Clostridialesf__Ruminococcaceaeg__Anaerotruncuss__Anaerotruncus_colihominis	0.0181266
								B-137	c__Bacillio__Lactobacillalesf__Enterococcaceaeg__Enterococcuss__Enterococcus_mundtii		0.0268123		B-275	c__Clostridiao__Clostridialesf__Clostridiales_nonameg__Pseudoflavonifractors__Pseudoflavonifractor_capillosus		0.0079208			B-208	c__Clostridiao__Clostridialesf__Clostridiaceaeg__Clostridiaceae_nonames__Clostridiaceae_bacterium_JC118	0.0154445		B-212	c__Clostridiao__Clostridialesf__Peptostreptococcaceaeg__Peptostreptococcaceae_nonames__Clostridium_bartlettii	0.0117417		B-390	c__Synergistiao__Synergistalesf__Synergistaceaeg__Fretibacteriums__Fretibacterium_fastidiosum	0.00424518		B-71	c__Bacteroidiao__Bacteroidalesf__Bacteroidaceaeg__Bacteroidess__Bacteroides_oleiciplenus	0.0170328
								B-245	c__Clostridiao__Clostridialesf__Eubacteriaceaeg__Eubacteriums__Eubacterium_sp_3_1_31		0.0264312		B-92	c__Bacteroidiao__Bacteroidalesf__Porphyromonadaceaeg__Odoribacters__Odoribacter_unclassified		0.00790418			B-261	c__Clostridiao__Clostridialesf__Lachnospiraceaeg__Lachnospiraceae_nonames__Lachnospiraceae_bacterium_8_1_57FAA	0.014689		B-315	c__Negativicuteso__Selenomonadalesf__Acidaminococcaceaeg__Acidaminococcuss__Acidaminococcus_unclassified	0.0115035		B-374	c__Gammaproteobacteriao__Enterobacterialesf__Enterobacteriaceaeg__Klebsiellas__Klebsiella_unclassified	0.00417831		B-51	c__Bacteroidiao__Bacteroidalesf__Rikenellaceaeg__Alistipess__Alistipes_sp_HGB5	0.0168774
								B-330	c__Negativicuteso__Selenomonadalesf__Veillonellaceaeg__Veillonellas__Veillonella_ratti		0.026328		B-333	c__Fusobacteriiao__Fusobacterialesf__Fusobacteriaceaeg__Fusobacteriums__Fusobacterium_nucleatum		0.00788258			B-327	c__Negativicuteso__Selenomonadalesf__Veillonellaceaeg__Veillonellas__Veillonella_atypica	0.0139246		B-237	c__Clostridiao__Clostridialesf__Lachnospiraceaeg__Doreas__Dorea_unclassified	0.0112815		B-244	c__Clostridiao__Clostridialesf__Eubacteriaceaeg__Eubacteriums__Eubacterium_siraeum	0.00396248		B-283	c__Clostridiao__Clostridialesf__Ruminococcaceaeg__Ruminococcuss__Ruminococcus_callidus	0.0164764
								B-253	c__Clostridiao__Clostridialesf__Lachnospiraceaeg__Lachnospiraceae_nonames__Lachnospiraceae_bacterium_2_1_58FAA		0.0260923		B-34	c__Actinobacteriao__Actinomycetalesf__Propionibacteriaceaeg__Propionibacteriums__Propionibacterium_acnes		0.00787052			B-296	c__Erysipelotrichiao__Erysipelotrichalesf__Erysipelotrichaceaeg__Erysipelotrichaceae_nonames__Clostridium_ramosum	0.0137179		B-271	c__Clostridiao__Clostridialesf__Peptostreptococcaceaeg__Peptostreptococcaceae_nonames__Peptostreptococcaceae_noname_unclassified	0.0108493		B-180	c__Bacillio__Lactobacillalesf__Streptococcaceaeg__Streptococcuss__Streptococcus_mitis_oralis_pneumoniae	0.0039566		B-73	c__Bacteroidiao__Bacteroidalesf__Bacteroidaceaeg__Bacteroidess__Bacteroides_plebeius	0.0164288
								B-6	c__Actinobacteriao__Actinomycetalesf__Actinomycetaceaeg__Actinomycess__Actinomyces_urogenitalis		0.0260215		B-187	c__Bacillio__Lactobacillalesf__Streptococcaceaeg__Streptococcuss__Streptococcus_thermophilus		0.00767909			B-211	c__Clostridiao__Clostridialesf__Clostridiaceaeg__Clostridiums__Clostridium_asparagiforme	0.0122668		B-92	c__Bacteroidiao__Bacteroidalesf__Porphyromonadaceaeg__Odoribacters__Odoribacter_unclassified	0.0101434		B-389	c__Spirochaetiao__Spirochaetalesf__Spirochaetaceaeg__Treponemas__Treponema_lecithinolyticum	0.00383663		B-187	c__Bacillio__Lactobacillalesf__Streptococcaceaeg__Streptococcuss__Streptococcus_thermophilus	0.0161353
								B-196	c__Clostridiao__Clostridialesf__Lachnospiraceaeg__Anaerostipess__Anaerostipes_hadrus		0.0259472		B-199	c__Clostridiao__Clostridialesf__Ruminococcaceaeg__Anaerotruncuss__Anaerotruncus_unclassified		0.0075613			B-252	c__Clostridiao__Clostridialesf__Lachnospiraceaeg__Lachnospiraceae_nonames__Lachnospiraceae_bacterium_2_1_46FAA	0.012043		B-209	c__Clostridiao__Clostridialesf__Clostridiales_nonameg__Clostridiales_nonames__Clostridiales_bacterium_1_7_47FAA	0.0100305		B-92	c__Bacteroidiao__Bacteroidalesf__Porphyromonadaceaeg__Odoribacters__Odoribacter_unclassified	0.00363624		B-22	c__Actinobacteriao__Coriobacterialesf__Coriobacteriaceaeg__Collinsellas__Collinsella_intestinalis	0.0153995
								B-357	c__Gammaproteobacteriao__Enterobacterialesf__Enterobacteriaceaeg__Citrobacters__Citrobacter_unclassified		0.0251415		B-271	c__Clostridiao__Clostridialesf__Peptostreptococcaceaeg__Peptostreptococcaceae_nonames__Peptostreptococcaceae_noname_unclassified		0.00752031			B-320	c__Negativicuteso__Selenomonadalesf__Veillonellaceaeg__Megamonass__Megamonas_hypermegale	0.0111451		B-52	c__Bacteroidiao__Bacteroidalesf__Rikenellaceaeg__Alistipess__Alistipes_unclassified	0.00981443		B-275	c__Clostridiao__Clostridialesf__Clostridiales_nonameg__Pseudoflavonifractors__Pseudoflavonifractor_capillosus	0.00357885		B-378	c__Gammaproteobacteriao__Enterobacterialesf__Enterobacteriaceaeg__Proteuss__Proteus_mirabilis	0.015066
								B-97	c__Bacteroidiao__Bacteroidalesf__Porphyromonadaceaeg__Parabacteroidess__Parabacteroides_sp_20_3		0.0249551		B-315	c__Negativicuteso__Selenomonadalesf__Acidaminococcaceaeg__Acidaminococcuss__Acidaminococcus_unclassified		0.00721565			B-34	c__Actinobacteriao__Actinomycetalesf__Propionibacteriaceaeg__Propionibacteriums__Propionibacterium_acnes	0.0107523		B-17	c__Actinobacteriao__Bifidobacterialesf__Bifidobacteriaceaeg__Bifidobacteriums__Bifidobacterium_pseudocatenulatum	0.00945889		B-52	c__Bacteroidiao__Bacteroidalesf__Rikenellaceaeg__Alistipess__Alistipes_unclassified	0.00341834		B-259	c__Clostridiao__Clostridialesf__Lachnospiraceaeg__Lachnospiraceae_nonames__Lachnospiraceae_bacterium_6_1_63FAA	0.015008
								B-51	c__Bacteroidiao__Bacteroidalesf__Rikenellaceaeg__Alistipess__Alistipes_sp_HGB5		0.0241865		B-251	c__Clostridiao__Clostridialesf__Lachnospiraceaeg__Lachnospiraceae_nonames__Lachnospiraceae_bacterium_1_4_56FAA		0.00698482			B-215	c__Clostridiao__Clostridialesf__Clostridiaceaeg__Clostridiums__Clostridium_citroniae	0.0104451		B-198	c__Clostridiao__Clostridialesf__Ruminococcaceaeg__Anaerotruncuss__Anaerotruncus_colihominis	0.00905908		B-296	c__Erysipelotrichiao__Erysipelotrichalesf__Erysipelotrichaceaeg__Erysipelotrichaceae_nonames__Clostridium_ramosum	0.00332121		B-359	c__Gammaproteobacteriao__Enterobacterialesf__Enterobacteriaceaeg__Enterobacters__Enterobacter_cloacae	0.0149231
								B-387	c__Spirochaetiao__Spirochaetalesf__Brachyspiraceaeg__Brachyspiras__Brachyspira_pilosicoli		0.0241426		B-305	c__Erysipelotrichiao__Erysipelotrichalesf__Erysipelotrichaceaeg__Erysipelotrichaceae_nonames__Erysipelotrichaceae_bacterium_6_1_45		0.00653602			B-233	c__Clostridiao__Clostridialesf__Lachnospiraceaeg__Coprococcuss__Coprococcus_eutactus	0.00977676		B-299	c__Erysipelotrichiao__Erysipelotrichalesf__Erysipelotrichaceaeg__Coprobacilluss__Coprobacillus_sp_D6	0.00879839		B-199	c__Clostridiao__Clostridialesf__Ruminococcaceaeg__Anaerotruncuss__Anaerotruncus_unclassified	0.00299154		B-309	c__Erysipelotrichiao__Erysipelotrichalesf__Erysipelotrichaceaeg__Holdemanias__Holdemania_filiformis	0.0140428
								B-151	c__Bacillio__Lactobacillalesf__Lactobacillaceaeg__Lactobacilluss__Lactobacillus_gasseri		0.023379		B-15	c__Actinobacteriao__Bifidobacterialesf__Bifidobacteriaceaeg__Bifidobacteriums__Bifidobacterium_dentium		0.00616907			B-231	c__Clostridiao__Clostridialesf__Lachnospiraceaeg__Coprococcuss__Coprococcus_catus	0.00935004		B-70	c__Bacteroidiao__Bacteroidalesf__Bacteroidaceaeg__Bacteroidess__Bacteroides_nordii	0.00783765		B-224	c__Clostridiao__Clostridialesf__Clostridiaceaeg__Clostridiums__Clostridium_scindens	0.00294068		B-208	c__Clostridiao__Clostridialesf__Clostridiaceaeg__Clostridiaceae_nonames__Clostridiaceae_bacterium_JC118	0.0140121
								B-300	c__Erysipelotrichiao__Erysipelotrichalesf__Erysipelotrichaceaeg__Coprobacilluss__Coprobacillus_unclassified		0.0217855		B-298	c__Erysipelotrichiao__Erysipelotrichalesf__Erysipelotrichaceaeg__Coprobacilluss__Coprobacillus_sp_29_1		0.00574952			B-151	c__Bacillio__Lactobacillalesf__Lactobacillaceaeg__Lactobacilluss__Lactobacillus_gasseri	0.00861265		B-230	c__Clostridiao__Clostridialesf__Clostridiaceaeg__Clostridiums__Clostridium_symbiosum	0.00733744		B-197	c__Clostridiao__Clostridialesf__Lachnospiraceaeg__Anaerostipess__Anaerostipes_unclassified	0.00254692		B-185	c__Bacillio__Lactobacillalesf__Streptococcaceaeg__Streptococcuss__Streptococcus_salivarius	0.013003
								B-309	c__Erysipelotrichiao__Erysipelotrichalesf__Erysipelotrichaceaeg__Holdemanias__Holdemania_filiformis		0.0214125		B-203	c__Clostridiao__Clostridialesf__Lachnospiraceaeg__Blautias__Blautia_producta		0.00560538			B-253	c__Clostridiao__Clostridialesf__Lachnospiraceaeg__Lachnospiraceae_nonames__Lachnospiraceae_bacterium_2_1_58FAA	0.00847974		B-346	c__Deltaproteobacteriao__Desulfovibrionalesf__Desulfovibrionaceaeg__Desulfovibrios__Desulfovibrio_desulfuricans	0.00698269		B-121	c__Bacteroidiao__Bacteroidalesf__Prevotellaceaeg__Prevotellas__Prevotella_timonensis	0.00235955		B-29	c__Actinobacteriao__Coriobacterialesf__Coriobacteriaceaeg__Eggerthellas__Eggerthella_unclassified	0.0123919
								B-68	c__Bacteroidiao__Bacteroidalesf__Bacteroidaceaeg__Bacteroidess__Bacteroides_intestinalis		0.0213827		B-346	c__Deltaproteobacteriao__Desulfovibrionalesf__Desulfovibrionaceaeg__Desulfovibrios__Desulfovibrio_desulfuricans		0.00508778			B-372	c__Gammaproteobacteriao__Enterobacterialesf__Enterobacteriaceaeg__Klebsiellas__Klebsiella_oxytoca	0.00761783		B-110	c__Bacteroidiao__Bacteroidalesf__Prevotellaceaeg__Prevotellas__Prevotella_bivia	0.00619198		B-357	c__Gammaproteobacteriao__Enterobacterialesf__Enterobacteriaceaeg__Citrobacters__Citrobacter_unclassified	0.00230135		B-94	c__Bacteroidiao__Bacteroidalesf__Porphyromonadaceaeg__Parabacteroidess__Parabacteroides_goldsteinii	0.0123103
								B-197	c__Clostridiao__Clostridialesf__Lachnospiraceaeg__Anaerostipess__Anaerostipes_unclassified		0.0212401		B-197	c__Clostridiao__Clostridialesf__Lachnospiraceaeg__Anaerostipess__Anaerostipes_unclassified		0.00502588			B-48	c__Bacteroidiao__Bacteroidalesf__Rikenellaceaeg__Alistipess__Alistipes_senegalensis	0.00758671		B-216	c__Clostridiao__Clostridialesf__Clostridiaceaeg__Clostridiums__Clostridium_clostridioforme	0.00609829		B-194	c__Clostridiao__Clostridialesf__Eubacteriaceaeg__Anaerofustiss__Anaerofustis_stercorihominis	0.00202519		B-115	c__Bacteroidiao__Bacteroidalesf__Prevotellaceaeg__Prevotellas__Prevotella_disiens	0.0116054
								B-17	c__Actinobacteriao__Bifidobacterialesf__Bifidobacteriaceaeg__Bifidobacteriums__Bifidobacterium_pseudocatenulatum		0.0208292		B-10	c__Actinobacteriao__Bifidobacterialesf__Bifidobacteriaceaeg__Bifidobacteriums__Bifidobacterium_animalis		0.00493278			B-112	c__Bacteroidiao__Bacteroidalesf__Prevotellaceaeg__Prevotellas__Prevotella_buccalis	0.00705529		B-187	c__Bacillio__Lactobacillalesf__Streptococcaceaeg__Streptococcuss__Streptococcus_thermophilus	0.00608546		B-238	c__Clostridiao__Clostridialesf__Eubacteriaceaeg__Eubacteriums__Eubacterium_brachy	0.00163652		B-182	c__Bacillio__Lactobacillalesf__Streptococcaceaeg__Streptococcuss__Streptococcus_parasanguinis	0.011031
								B-227	c__Clostridiao__Clostridialesf__Clostridiaceaeg__Clostridiums__Clostridium_sp_KLE_1755		0.0203484		B-50	c__Bacteroidiao__Bacteroidalesf__Rikenellaceaeg__Alistipess__Alistipes_sp_AP11		0.00484333			B-356	c__Gammaproteobacteriao__Enterobacterialesf__Enterobacteriaceaeg__Citrobacters__Citrobacter_freundii	0.00621125		B-112	c__Bacteroidiao__Bacteroidalesf__Prevotellaceaeg__Prevotellas__Prevotella_buccalis	0.00529781		B-255	c__Clostridiao__Clostridialesf__Lachnospiraceaeg__Lachnospiraceae_nonames__Lachnospiraceae_bacterium_3_1_57FAA_CT1	0.00154192		B-356	c__Gammaproteobacteriao__Enterobacterialesf__Enterobacteriaceaeg__Citrobacters__Citrobacter_freundii	0.00945754
								B-298	c__Erysipelotrichiao__Erysipelotrichalesf__Erysipelotrichaceaeg__Coprobacilluss__Coprobacillus_sp_29_1		0.0199265		B-372	c__Gammaproteobacteriao__Enterobacterialesf__Enterobacteriaceaeg__Klebsiellas__Klebsiella_oxytoca		0.00470748			B-102	c__Bacteroidiao__Bacteroidalesf__Prevotellaceaeg__Paraprevotellas__Paraprevotella_xylaniphila	0.00570376		B-253	c__Clostridiao__Clostridialesf__Lachnospiraceaeg__Lachnospiraceae_nonames__Lachnospiraceae_bacterium_2_1_58FAA	0.00519504		B-308	c__Erysipelotrichiao__Erysipelotrichalesf__Erysipelotrichaceaeg__Erysipelotrichaceae_nonames__Eubacterium_dolichum	0.00153459		B-269	c__Clostridiao__Clostridialesf__Clostridiales_Family_XI_Incertae_Sedisg__Peptoniphiluss__Peptoniphilus_harei	0.00925912
								B-22	c__Actinobacteriao__Coriobacterialesf__Coriobacteriaceaeg__Collinsellas__Collinsella_intestinalis		0.0198921		B-272	c__Clostridiao__Clostridialesf__Peptostreptococcaceaeg__Peptostreptococcuss__Peptostreptococcus_anaerobius		0.00439908			B-7	c__Actinobacteriao__Coriobacterialesf__Coriobacteriaceaeg__Adlercreutzias__Adlercreutzia_equolifaciens	0.00558639		B-7	c__Actinobacteriao__Coriobacterialesf__Coriobacteriaceaeg__Adlercreutzias__Adlercreutzia_equolifaciens	0.00504053		B-384	c__Gammaproteobacteriao__Pseudomonadalesf__Pseudomonadaceaeg__Pseudomonass__Pseudomonas_unclassified	0.00148018		B-214	c__Clostridiao__Clostridialesf__Clostridiaceaeg__Clostridiums__Clostridium_butyricum	0.00860722
								B-86	c__Bacteroidiao__Bacteroidalesf__Porphyromonadaceaeg__Coprobacters__Coprobacter_fastidiosus		0.0189035		B-257	c__Clostridiao__Clostridialesf__Lachnospiraceaeg__Lachnospiraceae_nonames__Lachnospiraceae_bacterium_5_1_57FAA		0.00420546			B-203	c__Clostridiao__Clostridialesf__Lachnospiraceaeg__Blautias__Blautia_producta	0.0053281		B-211	c__Clostridiao__Clostridialesf__Clostridiaceaeg__Clostridiums__Clostridium_asparagiforme	0.00502551		B-345	c__Deltaproteobacteriao__Desulfovibrionalesf__Desulfovibrionaceaeg__Bilophilas__Bilophila_wadsworthia	0.00142271		B-373	c__Gammaproteobacteriao__Enterobacterialesf__Enterobacteriaceaeg__Klebsiellas__Klebsiella_pneumoniae	0.00837264
								B-217	c__Clostridiao__Clostridialesf__Peptostreptococcaceaeg__Peptostreptococcaceae_nonames__Clostridium_difficile		0.0166792		B-313	c__Erysipelotrichiao__Erysipelotrichalesf__Erysipelotrichaceaeg__Turicibacters__Turicibacter_unclassified		0.00412017			B-24	c__Actinobacteriao__Coriobacterialesf__Coriobacteriaceaeg__Collinsellas__Collinsella_tanakaei	0.00530032		B-310	c__Erysipelotrichiao__Erysipelotrichalesf__Erysipelotrichaceaeg__Holdemanias__Holdemania_unclassified	0.00425645		B-306	c__Erysipelotrichiao__Erysipelotrichalesf__Erysipelotrichaceaeg__Erysipelotrichaceae_nonames__Eubacterium_biforme	0.00136202		B-48	c__Bacteroidiao__Bacteroidalesf__Rikenellaceaeg__Alistipess__Alistipes_senegalensis	0.00815
								B-346	c__Deltaproteobacteriao__Desulfovibrionalesf__Desulfovibrionaceaeg__Desulfovibrios__Desulfovibrio_desulfuricans		0.0165211		B-273	c__Clostridiao__Clostridialesf__Peptostreptococcaceaeg__Peptostreptococcuss__Peptostreptococcus_stomatis		0.00408094			B-15	c__Actinobacteriao__Bifidobacterialesf__Bifidobacteriaceaeg__Bifidobacteriums__Bifidobacterium_dentium	0.00520796		B-106	c__Bacteroidiao__Bacteroidalesf__Porphyromonadaceaeg__Porphyromonass__Porphyromonas_somerae	0.00409041		B-154	c__Bacillio__Lactobacillalesf__Lactobacillaceaeg__Lactobacilluss__Lactobacillus_plantarum	0.00130876		B-193	c__Clostridiao__Clostridialesf__Clostridiales_Family_XI_Incertae_Sedisg__Anaerococcuss__Anaerococcus_vaginalis	0.00785475
								B-198	c__Clostridiao__Clostridialesf__Ruminococcaceaeg__Anaerotruncuss__Anaerotruncus_colihominis		0.0151344		B-53	c__Bacteroidiao__Bacteroidalesf__Prevotellaceaeg__Alloprevotellas__Alloprevotella_tannerae		0.00385233			B-242	c__Clostridiao__Clostridialesf__Eubacteriaceaeg__Eubacteriums__Eubacterium_ramulus	0.00504794		B-307	c__Erysipelotrichiao__Erysipelotrichalesf__Erysipelotrichaceaeg__Erysipelotrichaceae_nonames__Eubacterium_cylindroides	0.0037998		B-163	c__Bacillio__Lactobacillalesf__Streptococcaceaeg__Lactococcuss__Lactococcus_lactis	0.00119152		B-215	c__Clostridiao__Clostridialesf__Clostridiaceaeg__Clostridiums__Clostridium_citroniae	0.00728921
								B-231	c__Clostridiao__Clostridialesf__Lachnospiraceaeg__Coprococcuss__Coprococcus_catus		0.0150103		B-341	c__Betaproteobacteriao__Burkholderialesf__Oxalobacteraceaeg__Oxalobacters__Oxalobacter_formigenes		0.003701			B-29	c__Actinobacteriao__Coriobacterialesf__Coriobacteriaceaeg__Eggerthellas__Eggerthella_unclassified	0.00425995		B-332	c__Fusobacteriiao__Fusobacterialesf__Fusobacteriaceaeg__Fusobacteriums__Fusobacterium_mortiferum	0.00378613		B-7	c__Actinobacteriao__Coriobacterialesf__Coriobacteriaceaeg__Adlercreutzias__Adlercreutzia_equolifaciens	0.0011777		B-310	c__Erysipelotrichiao__Erysipelotrichalesf__Erysipelotrichaceaeg__Holdemanias__Holdemania_unclassified	0.00702872
								B-133	c__Bacillio__Lactobacillalesf__Enterococcaceaeg__Enterococcuss__Enterococcus_faecalis		0.0141476		B-347	c__Deltaproteobacteriao__Desulfovibrionalesf__Desulfovibrionaceaeg__Desulfovibrios__Desulfovibrio_piger		0.00315381			B-275	c__Clostridiao__Clostridialesf__Clostridiales_nonameg__Pseudoflavonifractors__Pseudoflavonifractor_capillosus	0.00400973		B-29	c__Actinobacteriao__Coriobacterialesf__Coriobacteriaceaeg__Eggerthellas__Eggerthella_unclassified	0.00345758		B-37	c__Actinobacteriao__Actinomycetalesf__Micrococcaceaeg__Rothias__Rothia_mucilaginosa	0.00117136		B-67	c__Bacteroidiao__Bacteroidalesf__Bacteroidaceaeg__Bacteroidess__Bacteroides_gallinarum	0.00658434
								B-187	c__Bacillio__Lactobacillalesf__Streptococcaceaeg__Streptococcuss__Streptococcus_thermophilus		0.0134375		B-103	c__Bacteroidiao__Bacteroidalesf__Porphyromonadaceaeg__Porphyromonass__Porphyromonas_asaccharolytica		0.00289583			B-257	c__Clostridiao__Clostridialesf__Lachnospiraceaeg__Lachnospiraceae_nonames__Lachnospiraceae_bacterium_5_1_57FAA	0.00399448		B-275	c__Clostridiao__Clostridialesf__Clostridiales_nonameg__Pseudoflavonifractors__Pseudoflavonifractor_capillosus	0.00337543		B-282	c__Clostridiao__Clostridialesf__Ruminococcaceaeg__Ruminococcuss__Ruminococcus_bromii	0.00111369		B-55	c__Bacteroidiao__Bacteroidalesf__Bacteroidales_nonameg__Bacteroidales_nonames__Bacteroidales_bacterium_ph8	0.00645053
								B-251	c__Clostridiao__Clostridialesf__Lachnospiraceaeg__Lachnospiraceae_nonames__Lachnospiraceae_bacterium_1_4_56FAA		0.0131432		B-269	c__Clostridiao__Clostridialesf__Clostridiales_Family_XI_Incertae_Sedisg__Peptoniphiluss__Peptoniphilus_harei		0.00289259			B-224	c__Clostridiao__Clostridialesf__Clostridiaceaeg__Clostridiums__Clostridium_scindens	0.00391645		B-103	c__Bacteroidiao__Bacteroidalesf__Porphyromonadaceaeg__Porphyromonass__Porphyromonas_asaccharolytica	0.00276489		B-314	c__Negativicuteso__Selenomonadalesf__Acidaminococcaceaeg__Acidaminococcuss__Acidaminococcus_intestini	0.00109106		B-17	c__Actinobacteriao__Bifidobacterialesf__Bifidobacteriaceaeg__Bifidobacteriums__Bifidobacterium_pseudocatenulatum	0.00635597
								B-130	c__Bacillio__Lactobacillalesf__Enterococcaceaeg__Enterococcuss__Enterococcus_casseliflavus		0.0128075		B-102	c__Bacteroidiao__Bacteroidalesf__Prevotellaceaeg__Paraprevotellas__Paraprevotella_xylaniphila		0.00266604			B-310	c__Erysipelotrichiao__Erysipelotrichalesf__Erysipelotrichaceaeg__Holdemanias__Holdemania_unclassified	0.00362782		B-359	c__Gammaproteobacteriao__Enterobacterialesf__Enterobacteriaceaeg__Enterobacters__Enterobacter_cloacae	0.00274805		B-369	c__Gammaproteobacteriao__Pasteurellalesf__Pasteurellaceaeg__Haemophiluss__Haemophilus_pittmaniae	0.00106827		B-7	c__Actinobacteriao__Coriobacterialesf__Coriobacteriaceaeg__Adlercreutzias__Adlercreutzia_equolifaciens	0.00590779
								B-291	c__Clostridiao__Clostridialesf__Ruminococcaceaeg__Subdoligranulums__Subdoligranulum_sp_4_3_54A2FAA		0.0119837		B-268	c__Clostridiao__Clostridialesf__Clostridiales_Family_XI_Incertae_Sedisg__Parvimonass__Parvimonas_unclassified		0.0025839			B-301	c__Erysipelotrichiao__Erysipelotrichalesf__Erysipelotrichaceaeg__Erysipelotrichaceae_nonames__Erysipelotrichaceae_bacterium_2_2_44A	0.00353123		B-15	c__Actinobacteriao__Bifidobacterialesf__Bifidobacteriaceaeg__Bifidobacteriums__Bifidobacterium_dentium	0.00241971		B-120	c__Bacteroidiao__Bacteroidalesf__Prevotellaceaeg__Prevotellas__Prevotella_stercorea	0.00105471		B-382	c__Gammaproteobacteriao__Pseudomonadalesf__Pseudomonadaceaeg__Pseudomonass__Pseudomonas_aeruginosa	0.00588217
								B-135	c__Bacillio__Lactobacillalesf__Enterococcaceaeg__Enterococcuss__Enterococcus_gallinarum		0.0117916		B-173	c__Bacillio__Lactobacillalesf__Streptococcaceaeg__Streptococcuss__Streptococcus_australis		0.00254519			B-115	c__Bacteroidiao__Bacteroidalesf__Prevotellaceaeg__Prevotellas__Prevotella_disiens	0.00343693		B-215	c__Clostridiao__Clostridialesf__Clostridiaceaeg__Clostridiums__Clostridium_citroniae	0.00241774		B-202	c__Clostridiao__Clostridialesf__Lachnospiraceaeg__Blautias__Blautia_hydrogenotrophica	0.00105448		B-45	c__Bacteroidiao__Bacteroidalesf__Rikenellaceaeg__Alistipess__Alistipes_indistinctus	0.00580896
								B-255	c__Clostridiao__Clostridialesf__Lachnospiraceaeg__Lachnospiraceae_nonames__Lachnospiraceae_bacterium_3_1_57FAA_CT1		0.0116885		B-28	c__Actinobacteriao__Coriobacterialesf__Coriobacteriaceaeg__Eggerthellas__Eggerthella_lenta		0.00237898			B-374	c__Gammaproteobacteriao__Enterobacterialesf__Enterobacteriaceaeg__Klebsiellas__Klebsiella_unclassified	0.0034295		B-305	c__Erysipelotrichiao__Erysipelotrichalesf__Erysipelotrichaceaeg__Erysipelotrichaceae_nonames__Erysipelotrichaceae_bacterium_6_1_45	0.00234775		B-251	c__Clostridiao__Clostridialesf__Lachnospiraceaeg__Lachnospiraceae_nonames__Lachnospiraceae_bacterium_1_4_56FAA	0.000952575		B-110	c__Bacteroidiao__Bacteroidalesf__Prevotellaceaeg__Prevotellas__Prevotella_bivia	0.00579066
								B-211	c__Clostridiao__Clostridialesf__Clostridiaceaeg__Clostridiums__Clostridium_asparagiforme		0.0102674		B-353	c__Gammaproteobacteriao__Pasteurellalesf__Pasteurellaceaeg__Actinobacilluss__Actinobacillus_unclassified		0.00218731			B-321	c__Negativicuteso__Selenomonadalesf__Veillonellaceaeg__Megamonass__Megamonas_rupellensis	0.00299908		B-325	c__Negativicuteso__Selenomonadalesf__Veillonellaceaeg__Mitsuokellas__Mitsuokella_unclassified	0.00234054		B-198	c__Clostridiao__Clostridialesf__Ruminococcaceaeg__Anaerotruncuss__Anaerotruncus_colihominis	0.0009425		B-298	c__Erysipelotrichiao__Erysipelotrichalesf__Erysipelotrichaceaeg__Coprobacilluss__Coprobacillus_sp_29_1	0.00561658
								B-341	c__Betaproteobacteriao__Burkholderialesf__Oxalobacteraceaeg__Oxalobacters__Oxalobacter_formigenes		0.0099958		B-7	c__Actinobacteriao__Coriobacterialesf__Coriobacteriaceaeg__Adlercreutzias__Adlercreutzia_equolifaciens		0.00190088			B-106	c__Bacteroidiao__Bacteroidalesf__Porphyromonadaceaeg__Porphyromonass__Porphyromonas_somerae	0.00288283		B-272	c__Clostridiao__Clostridialesf__Peptostreptococcaceaeg__Peptostreptococcuss__Peptostreptococcus_anaerobius	0.00228502		B-325	c__Negativicuteso__Selenomonadalesf__Veillonellaceaeg__Mitsuokellas__Mitsuokella_unclassified	0.000903077		B-192	c__Clostridiao__Clostridialesf__Clostridiales_Family_XI_Incertae_Sedisg__Anaerococcuss__Anaerococcus_obesiensis	0.00560769
								B-179	c__Bacillio__Lactobacillalesf__Streptococcaceaeg__Streptococcuss__Streptococcus_lutetiensis		0.00984024		B-377	c__Gammaproteobacteriao__Enterobacterialesf__Enterobacteriaceaeg__Pantoeas__Pantoea_unclassified		0.00181411			B-92	c__Bacteroidiao__Bacteroidalesf__Porphyromonadaceaeg__Odoribacters__Odoribacter_unclassified	0.00238104		B-71	c__Bacteroidiao__Bacteroidalesf__Bacteroidaceaeg__Bacteroidess__Bacteroides_oleiciplenus	0.00191271		B-164	c__Bacillio__Lactobacillalesf__Lactobacillaceaeg__Pediococcuss__Pediococcus_acidilactici	0.000773269		B-257	c__Clostridiao__Clostridialesf__Lachnospiraceaeg__Lachnospiraceae_nonames__Lachnospiraceae_bacterium_5_1_57FAA	0.00530402
								B-11	c__Actinobacteriao__Bifidobacterialesf__Bifidobacteriaceaeg__Bifidobacteriums__Bifidobacterium_asteroides		0.0098334		B-324	c__Negativicuteso__Selenomonadalesf__Veillonellaceaeg__Megasphaeras__Megasphaera_unclassified		0.00169326			B-110	c__Bacteroidiao__Bacteroidalesf__Prevotellaceaeg__Prevotellas__Prevotella_bivia	0.00228036		B-107	c__Bacteroidiao__Bacteroidalesf__Porphyromonadaceaeg__Porphyromonass__Porphyromonas_uenonis	0.00184958		B-356	c__Gammaproteobacteriao__Enterobacterialesf__Enterobacteriaceaeg__Citrobacters__Citrobacter_freundii	0.000748462		B-107	c__Bacteroidiao__Bacteroidalesf__Porphyromonadaceaeg__Porphyromonass__Porphyromonas_uenonis	0.00501926
								B-48	c__Bacteroidiao__Bacteroidalesf__Rikenellaceaeg__Alistipess__Alistipes_senegalensis		0.00958199		B-359	c__Gammaproteobacteriao__Enterobacterialesf__Enterobacteriaceaeg__Enterobacters__Enterobacter_cloacae		0.00157116			B-25	c__Actinobacteriao__Coriobacterialesf__Coriobacteriaceaeg__Collinsellas__Collinsella_unclassified	0.0022426		B-251	c__Clostridiao__Clostridialesf__Lachnospiraceaeg__Lachnospiraceae_nonames__Lachnospiraceae_bacterium_1_4_56FAA	0.00174561		B-259	c__Clostridiao__Clostridialesf__Lachnospiraceaeg__Lachnospiraceae_nonames__Lachnospiraceae_bacterium_6_1_63FAA	0.000732885		B-305	c__Erysipelotrichiao__Erysipelotrichalesf__Erysipelotrichaceaeg__Erysipelotrichaceae_nonames__Erysipelotrichaceae_bacterium_6_1_45	0.00482987
								B-145	c__Bacillio__Lactobacillalesf__Lactobacillaceaeg__Lactobacilluss__Lactobacillus_animalis		0.00955455		B-374	c__Gammaproteobacteriao__Enterobacterialesf__Enterobacteriaceaeg__Klebsiellas__Klebsiella_unclassified		0.00151355			B-103	c__Bacteroidiao__Bacteroidalesf__Porphyromonadaceaeg__Porphyromonass__Porphyromonas_asaccharolytica	0.0021774		B-26	c__Actinobacteriao__Coriobacterialesf__Coriobacteriaceaeg__Coriobacteriaceae_nonames__Coriobacteriaceae_bacterium_phI	0.00166226		B-151	c__Bacillio__Lactobacillalesf__Lactobacillaceaeg__Lactobacilluss__Lactobacillus_gasseri	0.000732692		B-321	c__Negativicuteso__Selenomonadalesf__Veillonellaceaeg__Megamonass__Megamonas_rupellensis	0.00477938
								B-102	c__Bacteroidiao__Bacteroidalesf__Prevotellaceaeg__Paraprevotellas__Paraprevotella_xylaniphila		0.00891342		B-375	c__Gammaproteobacteriao__Enterobacterialesf__Enterobacteriaceaeg__Morganellas__Morganella_morganii		0.00144778			B-281	c__Clostridiao__Clostridialesf__Ruminococcaceaeg__Ruminococcuss__Ruminococcus_albus	0.00209599		B-224	c__Clostridiao__Clostridialesf__Clostridiaceaeg__Clostridiums__Clostridium_scindens	0.00162436		B-203	c__Clostridiao__Clostridialesf__Lachnospiraceaeg__Blautias__Blautia_producta	0.000680467		B-275	c__Clostridiao__Clostridialesf__Clostridiales_nonameg__Pseudoflavonifractors__Pseudoflavonifractor_capillosus	0.00475956
								B-94	c__Bacteroidiao__Bacteroidalesf__Porphyromonadaceaeg__Parabacteroidess__Parabacteroides_goldsteinii		0.00830327		B-37	c__Actinobacteriao__Actinomycetalesf__Micrococcaceaeg__Rothias__Rothia_mucilaginosa		0.00137457			B-373	c__Gammaproteobacteriao__Enterobacterialesf__Enterobacteriaceaeg__Klebsiellas__Klebsiella_pneumoniae	0.00196533		B-333	c__Fusobacteriiao__Fusobacterialesf__Fusobacteriaceaeg__Fusobacteriums__Fusobacterium_nucleatum	0.00154765		B-326	c__Negativicuteso__Selenomonadalesf__Acidaminococcaceaeg__Phascolarctobacteriums__Phascolarctobacterium_succinatutens	0.000638846		B-92	c__Bacteroidiao__Bacteroidalesf__Porphyromonadaceaeg__Odoribacters__Odoribacter_unclassified	0.00464539
								B-374	c__Gammaproteobacteriao__Enterobacterialesf__Enterobacteriaceaeg__Klebsiellas__Klebsiella_unclassified		0.0078399		B-110	c__Bacteroidiao__Bacteroidalesf__Prevotellaceaeg__Prevotellas__Prevotella_bivia		0.00133852			B-107	c__Bacteroidiao__Bacteroidalesf__Porphyromonadaceaeg__Porphyromonass__Porphyromonas_uenonis	0.00186934		B-14	c__Actinobacteriao__Bifidobacterialesf__Bifidobacteriaceaeg__Bifidobacteriums__Bifidobacterium_catenulatum	0.00152713		B-215	c__Clostridiao__Clostridialesf__Clostridiaceaeg__Clostridiums__Clostridium_citroniae	0.000637421		B-10	c__Actinobacteriao__Bifidobacterialesf__Bifidobacteriaceaeg__Bifidobacteriums__Bifidobacterium_animalis	0.00463706
								B-115	c__Bacteroidiao__Bacteroidalesf__Prevotellaceaeg__Prevotellas__Prevotella_disiens		0.00772402		B-142	c__Bacillio__Lactobacillalesf__Carnobacteriaceaeg__Granulicatellas__Granulicatella_elegans		0.00133782			B-195	c__Clostridiao__Clostridialesf__Lachnospiraceaeg__Anaerostipess__Anaerostipes_caccae	0.00161104		B-172	c__Bacillio__Lactobacillalesf__Streptococcaceaeg__Streptococcuss__Streptococcus_anginosus	0.00148542		B-13	c__Actinobacteriao__Bifidobacterialesf__Bifidobacteriaceaeg__Bifidobacteriums__Bifidobacterium_breve	0.000572115		B-202	c__Clostridiao__Clostridialesf__Lachnospiraceaeg__Blautias__Blautia_hydrogenotrophica	0.00449534
								B-146	c__Bacillio__Lactobacillalesf__Lactobacillaceaeg__Lactobacilluss__Lactobacillus_casei_paracasei		0.00743327		B-304	c__Erysipelotrichiao__Erysipelotrichalesf__Erysipelotrichaceaeg__Erysipelotrichaceae_nonames__Erysipelotrichaceae_bacterium_5_2_54FAA		0.00131481			B-202	c__Clostridiao__Clostridialesf__Lachnospiraceaeg__Blautias__Blautia_hydrogenotrophica	0.0015421		B-281	c__Clostridiao__Clostridialesf__Ruminococcaceaeg__Ruminococcuss__Ruminococcus_albus	0.00136439		B-377	c__Gammaproteobacteriao__Enterobacterialesf__Enterobacteriaceaeg__Pantoeas__Pantoea_unclassified	0.0004875		B-199	c__Clostridiao__Clostridialesf__Ruminococcaceaeg__Anaerotruncuss__Anaerotruncus_unclassified	0.00406446
								B-199	c__Clostridiao__Clostridialesf__Ruminococcaceaeg__Anaerotruncuss__Anaerotruncus_unclassified		0.00717639		B-143	c__Bacillio__Lactobacillalesf__Carnobacteriaceaeg__Granulicatellas__Granulicatella_unclassified		0.00126277			B-384	c__Gammaproteobacteriao__Pseudomonadalesf__Pseudomonadaceaeg__Pseudomonass__Pseudomonas_unclassified	0.00149987		B-173	c__Bacillio__Lactobacillalesf__Streptococcaceaeg__Streptococcuss__Streptococcus_australis	0.00135651		B-310	c__Erysipelotrichiao__Erysipelotrichalesf__Erysipelotrichaceaeg__Holdemanias__Holdemania_unclassified	0.000471799		B-295	c__Erysipelotrichiao__Erysipelotrichalesf__Erysipelotrichaceaeg__Erysipelotrichaceae_nonames__Clostridium_innocuum	0.00401262
								B-34	c__Actinobacteriao__Actinomycetalesf__Propionibacteriaceaeg__Propionibacteriums__Propionibacterium_acnes		0.00697924		B-384	c__Gammaproteobacteriao__Pseudomonadalesf__Pseudomonadaceaeg__Pseudomonass__Pseudomonas_unclassified		0.00123207			B-353	c__Gammaproteobacteriao__Pasteurellalesf__Pasteurellaceaeg__Actinobacilluss__Actinobacillus_unclassified	0.00132946		B-115	c__Bacteroidiao__Bacteroidalesf__Prevotellaceaeg__Prevotellas__Prevotella_disiens	0.00110871		B-359	c__Gammaproteobacteriao__Enterobacterialesf__Enterobacteriaceaeg__Enterobacters__Enterobacter_cloacae	0.000466346		B-346	c__Deltaproteobacteriao__Desulfovibrionalesf__Desulfovibrionaceaeg__Desulfovibrios__Desulfovibrio_desulfuricans	0.00364435
								B-129	c__Bacillio__Lactobacillalesf__Enterococcaceaeg__Enterococcuss__Enterococcus_avium		0.0066706		B-296	c__Erysipelotrichiao__Erysipelotrichalesf__Erysipelotrichaceaeg__Erysipelotrichaceae_nonames__Clostridium_ramosum		0.00118606			B-357	c__Gammaproteobacteriao__Enterobacterialesf__Enterobacteriaceaeg__Citrobacters__Citrobacter_unclassified	0.00132248		B-301	c__Erysipelotrichiao__Erysipelotrichalesf__Erysipelotrichaceaeg__Erysipelotrichaceae_nonames__Erysipelotrichaceae_bacterium_2_2_44A	0.00092581		B-346	c__Deltaproteobacteriao__Desulfovibrionalesf__Desulfovibrionaceaeg__Desulfovibrios__Desulfovibrio_desulfuricans	0.000417787		B-25	c__Actinobacteriao__Coriobacterialesf__Coriobacteriaceaeg__Collinsellas__Collinsella_unclassified	0.00363789
								B-112	c__Bacteroidiao__Bacteroidalesf__Prevotellaceaeg__Prevotellas__Prevotella_buccalis		0.00570976		B-23	c__Actinobacteriao__Coriobacterialesf__Coriobacteriaceaeg__Collinsellas__Collinsella_stercoris		0.00116245			B-305	c__Erysipelotrichiao__Erysipelotrichalesf__Erysipelotrichaceaeg__Erysipelotrichaceae_nonames__Erysipelotrichaceae_bacterium_6_1_45	0.0013219		B-208	c__Clostridiao__Clostridialesf__Clostridiaceaeg__Clostridiaceae_nonames__Clostridiaceae_bacterium_JC118	0.000917851		B-34	c__Actinobacteriao__Actinomycetalesf__Propionibacteriaceaeg__Propionibacteriums__Propionibacterium_acnes	0.000414426		B-178	c__Bacillio__Lactobacillalesf__Streptococcaceaeg__Streptococcuss__Streptococcus_intermedius	0.00328893
								B-29	c__Actinobacteriao__Coriobacterialesf__Coriobacteriaceaeg__Eggerthellas__Eggerthella_unclassified		0.0055607		B-270	c__Clostridiao__Clostridialesf__Clostridiales_Family_XI_Incertae_Sedisg__Peptoniphiluss__Peptoniphilus_lacrimalis		0.00110037			B-350	c__Epsilonproteobacteriao__Campylobacteralesf__Campylobacteraceaeg__Campylobacters__Campylobacter_hominis	0.00119366		B-206	c__Clostridiao__Clostridialesf__Lachnospiraceaeg__Butyrivibrios__Butyrivibrio_unclassified	0.00086245		B-165	c__Bacillio__Lactobacillalesf__Lactobacillaceaeg__Pediococcuss__Pediococcus_lolii	0.000413462		B-333	c__Fusobacteriiao__Fusobacterialesf__Fusobacteriaceaeg__Fusobacteriums__Fusobacterium_nucleatum	0.00324497
								B-128	c__Bacillio__Lactobacillalesf__Enterococcaceaeg__Enterococcuss__Enterococcus_asini		0.00541061		B-210	c__Clostridiao__Clostridialesf__Clostridiales_Family_XI_Incertae_Sedisg__Clostridiales_Family_XI_Incertae_Sedis_nonames__Clostridiales_bacterium_BV3C26		0.0010113			B-130	c__Bacillio__Lactobacillalesf__Enterococcaceaeg__Enterococcuss__Enterococcus_casseliflavus	0.00117903		B-257	c__Clostridiao__Clostridialesf__Lachnospiraceaeg__Lachnospiraceae_nonames__Lachnospiraceae_bacterium_5_1_57FAA	0.000835451		B-188	c__Bacillio__Lactobacillalesf__Streptococcaceaeg__Streptococcuss__Streptococcus_vestibularis	0.000409689		B-301	c__Erysipelotrichiao__Erysipelotrichalesf__Erysipelotrichaceaeg__Erysipelotrichaceae_nonames__Erysipelotrichaceae_bacterium_2_2_44A	0.00322826
								B-234	c__Clostridiao__Clostridialesf__Lachnospiraceaeg__Coprococcuss__Coprococcus_sp_ART55_1		0.00537591		B-104	c__Bacteroidiao__Bacteroidalesf__Porphyromonadaceaeg__Porphyromonass__Porphyromonas_bennonis		0.000962222			B-348	c__Epsilonproteobacteriao__Campylobacteralesf__Campylobacteraceaeg__Campylobacters__Campylobacter_concisus	0.00102443		B-353	c__Gammaproteobacteriao__Pasteurellalesf__Pasteurellaceaeg__Actinobacilluss__Actinobacillus_unclassified	0.000789472		B-323	c__Negativicuteso__Selenomonadalesf__Veillonellaceaeg__Megasphaeras__Megasphaera_micronuciformis	0.000386181		B-50	c__Bacteroidiao__Bacteroidalesf__Rikenellaceaeg__Alistipess__Alistipes_sp_AP11	0.00309105
								B-25	c__Actinobacteriao__Coriobacterialesf__Coriobacteriaceaeg__Collinsellas__Collinsella_unclassified		0.00471201		B-314	c__Negativicuteso__Selenomonadalesf__Acidaminococcaceaeg__Acidaminococcuss__Acidaminococcus_intestini		0.000948333			B-295	c__Erysipelotrichiao__Erysipelotrichalesf__Erysipelotrichaceaeg__Erysipelotrichaceae_nonames__Clostridium_innocuum	0.000962621		B-202	c__Clostridiao__Clostridialesf__Lachnospiraceaeg__Blautias__Blautia_hydrogenotrophica	0.000739655		B-28	c__Actinobacteriao__Coriobacterialesf__Coriobacteriaceaeg__Eggerthellas__Eggerthella_lenta	0.000366731		B-226	c__Clostridiao__Clostridialesf__Clostridiaceaeg__Clostridiums__Clostridium_sp_D5	0.00259105
								B-70	c__Bacteroidiao__Bacteroidalesf__Bacteroidaceaeg__Bacteroidess__Bacteroides_nordii		0.00414459		B-146	c__Bacillio__Lactobacillalesf__Lactobacillaceaeg__Lactobacilluss__Lactobacillus_casei_paracasei		0.000900185			B-262	c__Clostridiao__Clostridialesf__Lachnospiraceaeg__Lachnospiraceae_nonames__Lachnospiraceae_bacterium_9_1_43BFAA	0.000950068		B-350	c__Epsilonproteobacteriao__Campylobacteralesf__Campylobacteraceaeg__Campylobacters__Campylobacter_hominis	0.000586667		B-336	c__Betaproteobacteriao__Burkholderialesf__Burkholderiaceaeg__Burkholderias__Burkholderia_unclassified	0.000360962		B-355	c__Gammaproteobacteriao__Pasteurellalesf__Pasteurellaceaeg__Aggregatibacters__Aggregatibacter_unclassified	0.00245171
								B-262	c__Clostridiao__Clostridialesf__Lachnospiraceaeg__Lachnospiraceae_nonames__Lachnospiraceae_bacterium_9_1_43BFAA		0.0040565		B-302	c__Erysipelotrichiao__Erysipelotrichalesf__Erysipelotrichaceaeg__Erysipelotrichaceae_nonames__Erysipelotrichaceae_bacterium_21_3		0.000685051			B-306	c__Erysipelotrichiao__Erysipelotrichalesf__Erysipelotrichaceaeg__Erysipelotrichaceae_nonames__Eubacterium_biforme	0.000936214		B-321	c__Negativicuteso__Selenomonadalesf__Veillonellaceaeg__Megamonass__Megamonas_rupellensis	0.000537487		B-150	c__Bacillio__Lactobacillalesf__Lactobacillaceaeg__Lactobacilluss__Lactobacillus_fermentum	0.000320156		B-304	c__Erysipelotrichiao__Erysipelotrichalesf__Erysipelotrichaceaeg__Erysipelotrichaceae_nonames__Erysipelotrichaceae_bacterium_5_2_54FAA	0.00238062
								B-323	c__Negativicuteso__Selenomonadalesf__Veillonellaceaeg__Megasphaeras__Megasphaera_micronuciformis		0.0039963		B-48	c__Bacteroidiao__Bacteroidalesf__Rikenellaceaeg__Alistipess__Alistipes_senegalensis		0.0006691			B-179	c__Bacillio__Lactobacillalesf__Streptococcaceaeg__Streptococcuss__Streptococcus_lutetiensis	0.000920915		B-336	c__Betaproteobacteriao__Burkholderialesf__Burkholderiaceaeg__Burkholderias__Burkholderia_unclassified	0.000497849		B-143	c__Bacillio__Lactobacillalesf__Carnobacteriaceaeg__Granulicatellas__Granulicatella_unclassified	0.000292719		B-354	c__Gammaproteobacteriao__Pasteurellalesf__Pasteurellaceaeg__Aggregatibacters__Aggregatibacter_segnis	0.0023792
								B-295	c__Erysipelotrichiao__Erysipelotrichalesf__Erysipelotrichaceaeg__Erysipelotrichaceae_nonames__Clostridium_innocuum		0.00390473		B-356	c__Gammaproteobacteriao__Enterobacterialesf__Enterobacteriaceaeg__Citrobacters__Citrobacter_freundii		0.000665741			B-30	c__Actinobacteriao__Bifidobacterialesf__Bifidobacteriaceaeg__Gardnerellas__Gardnerella_vaginalis	0.00090696		B-318	c__Negativicuteso__Selenomonadalesf__Veillonellaceaeg__Dialisters__Dialister_micraerophilus	0.000479574		B-262	c__Clostridiao__Clostridialesf__Lachnospiraceaeg__Lachnospiraceae_nonames__Lachnospiraceae_bacterium_9_1_43BFAA	0.000285064		B-134	c__Bacillio__Lactobacillalesf__Enterococcaceaeg__Enterococcuss__Enterococcus_faecium	0.00229144
								B-42	c__Actinobacteriao__Actinomycetalesf__Actinomycetaceaeg__Varibaculums__Varibaculum_cambriense		0.00374808		B-59	c__Bacteroidiao__Bacteroidalesf__Bacteroidaceaeg__Bacteroidess__Bacteroides_clarus		0.000620403			B-347	c__Deltaproteobacteriao__Desulfovibrionalesf__Desulfovibrionaceaeg__Desulfovibrios__Desulfovibrio_piger	0.000851376		B-313	c__Erysipelotrichiao__Erysipelotrichalesf__Erysipelotrichaceaeg__Turicibacters__Turicibacter_unclassified	0.000419646		B-148	c__Bacillio__Lactobacillalesf__Lactobacillaceaeg__Lactobacilluss__Lactobacillus_curvatus	0.000243904		B-23	c__Actinobacteriao__Coriobacterialesf__Coriobacteriaceaeg__Collinsellas__Collinsella_stercoris	0.00213906
								B-316	c__Negativicuteso__Selenomonadalesf__Veillonellaceaeg__Anaeroglobuss__Anaeroglobus_geminatus		0.00371705		B-181	c__Bacillio__Lactobacillalesf__Streptococcaceaeg__Streptococcuss__Streptococcus_mutans		0.000618108			B-59	c__Bacteroidiao__Bacteroidalesf__Bacteroidaceaeg__Bacteroidess__Bacteroides_clarus	0.000816867		B-171	c__Bacillio__Lactobacillalesf__Streptococcaceaeg__Streptococcuss__Streptococcus_agalactiae	0.000413562		B-347	c__Deltaproteobacteriao__Desulfovibrionalesf__Desulfovibrionaceaeg__Desulfovibrios__Desulfovibrio_piger	0.000183675		B-24	c__Actinobacteriao__Coriobacterialesf__Coriobacteriaceaeg__Collinsellas__Collinsella_tanakaei	0.00191724
								B-223	c__Clostridiao__Clostridialesf__Clostridiaceaeg__Clostridiums__Clostridium_perfringens		0.00369077		B-188	c__Bacillio__Lactobacillalesf__Streptococcaceaeg__Streptococcuss__Streptococcus_vestibularis		0.000601984			B-272	c__Clostridiao__Clostridialesf__Peptostreptococcaceaeg__Peptostreptococcuss__Peptostreptococcus_anaerobius	0.00078662		B-177	c__Bacillio__Lactobacillalesf__Streptococcaceaeg__Streptococcuss__Streptococcus_infantis	0.00039942		B-112	c__Bacteroidiao__Bacteroidalesf__Prevotellaceaeg__Prevotellas__Prevotella_buccalis	0.00017771		B-223	c__Clostridiao__Clostridialesf__Clostridiaceaeg__Clostridiums__Clostridium_perfringens	0.001602
								B-204	c__Clostridiao__Clostridialesf__Clostridiaceaeg__Butyricicoccuss__Butyricicoccus_pullicaecorum		0.00344682		B-318	c__Negativicuteso__Selenomonadalesf__Veillonellaceaeg__Dialisters__Dialister_micraerophilus		0.00059871			B-23	c__Actinobacteriao__Coriobacterialesf__Coriobacteriaceaeg__Collinsellas__Collinsella_stercoris	0.000763827		B-59	c__Bacteroidiao__Bacteroidalesf__Bacteroidaceaeg__Bacteroidess__Bacteroides_clarus	0.00039923		B-281	c__Clostridiao__Clostridialesf__Ruminococcaceaeg__Ruminococcuss__Ruminococcus_albus	0.000175399		B-224	c__Clostridiao__Clostridialesf__Clostridiaceaeg__Clostridiums__Clostridium_scindens	0.00159166
								B-359	c__Gammaproteobacteriao__Enterobacterialesf__Enterobacteriaceaeg__Enterobacters__Enterobacter_cloacae		0.00328057		B-157	c__Bacillio__Lactobacillalesf__Lactobacillaceaeg__Lactobacilluss__Lactobacillus_ruminis		0.000593644			B-5	c__Actinobacteriao__Actinomycetalesf__Actinomycetaceaeg__Actinomycess__Actinomyces_turicensis	0.000724366		B-285	c__Clostridiao__Clostridialesf__Ruminococcaceaeg__Ruminococcuss__Ruminococcus_flavefaciens	0.000367595		B-122	c__Flavobacteriiao__Flavobacterialesf__Flavobacteriaceaeg__Cellulophagas__Cellulophaga_unclassified	0.0001575		B-325	c__Negativicuteso__Selenomonadalesf__Veillonellaceaeg__Mitsuokellas__Mitsuokella_unclassified	0.00145185
								B-173	c__Bacillio__Lactobacillalesf__Streptococcaceaeg__Streptococcuss__Streptococcus_australis		0.00327455		B-149	c__Bacillio__Lactobacillalesf__Lactobacillaceaeg__Lactobacilluss__Lactobacillus_delbrueckii		0.000575789			B-251	c__Clostridiao__Clostridialesf__Lachnospiraceaeg__Lachnospiraceae_nonames__Lachnospiraceae_bacterium_1_4_56FAA	0.000664791		B-22	c__Actinobacteriao__Coriobacterialesf__Coriobacteriaceaeg__Collinsellas__Collinsella_intestinalis	0.000365484		B-178	c__Bacillio__Lactobacillalesf__Streptococcaceaeg__Streptococcuss__Streptococcus_intermedius	0.000156346		B-88	c__Bacteroidiao__Bacteroidalesf__Porphyromonadaceaeg__Dysgonomonass__Dysgonomonas_mossii	0.00141829
								B-8	c__Actinobacteriao__Bifidobacterialesf__Bifidobacteriaceaeg__Alloscardovias__Alloscardovia_omnicolens		0.00317445		B-140	c__Bacillio__Bacillalesf__Bacillales_nonameg__Gemellas__Gemella_morbillorum		0.000562963			B-108	c__Bacteroidiao__Bacteroidalesf__Prevotellaceaeg__Prevotellas__Prevotella_amnii	0.000637606		B-374	c__Gammaproteobacteriao__Enterobacterialesf__Enterobacteriaceaeg__Klebsiellas__Klebsiella_unclassified	0.000327832		B-301	c__Erysipelotrichiao__Erysipelotrichalesf__Erysipelotrichaceaeg__Erysipelotrichaceae_nonames__Erysipelotrichaceae_bacterium_2_2_44A	0.000152115		B-34	c__Actinobacteriao__Actinomycetalesf__Propionibacteriaceaeg__Propionibacteriums__Propionibacterium_acnes	0.00139093
								B-384	c__Gammaproteobacteriao__Pseudomonadalesf__Pseudomonadaceaeg__Pseudomonass__Pseudomonas_unclassified		0.0031119		B-267	c__Clostridiao__Clostridialesf__Clostridiales_Family_XI_Incertae_Sedisg__Parvimonass__Parvimonas_micra		0.000560185			B-173	c__Bacillio__Lactobacillalesf__Streptococcaceaeg__Streptococcuss__Streptococcus_australis	0.000620141		B-104	c__Bacteroidiao__Bacteroidalesf__Porphyromonadaceaeg__Porphyromonass__Porphyromonas_bennonis	0.000304624		B-155	c__Bacillio__Lactobacillalesf__Lactobacillaceaeg__Lactobacilluss__Lactobacillus_reuteri	0.000139231		B-302	c__Erysipelotrichiao__Erysipelotrichalesf__Erysipelotrichaceaeg__Erysipelotrichaceae_nonames__Erysipelotrichaceae_bacterium_21_3	0.00137519
								B-208	c__Clostridiao__Clostridialesf__Clostridiaceaeg__Clostridiaceae_nonames__Clostridiaceae_bacterium_JC118		0.00294924		B-354	c__Gammaproteobacteriao__Pasteurellalesf__Pasteurellaceaeg__Aggregatibacters__Aggregatibacter_segnis		0.000530422			B-313	c__Erysipelotrichiao__Erysipelotrichalesf__Erysipelotrichaceaeg__Turicibacters__Turicibacter_unclassified	0.000600995		B-37	c__Actinobacteriao__Actinomycetalesf__Micrococcaceaeg__Rothias__Rothia_mucilaginosa	0.000284084		B-124	c__Deinococcio__Deinococcalesf__Deinococcaceaeg__Deinococcuss__Deinococcus_unclassified	0.00011		B-195	c__Clostridiao__Clostridialesf__Lachnospiraceaeg__Anaerostipess__Anaerostipes_caccae	0.00130791
								B-121	c__Bacteroidiao__Bacteroidalesf__Prevotellaceaeg__Prevotellas__Prevotella_timonensis		0.00286073		B-295	c__Erysipelotrichiao__Erysipelotrichalesf__Erysipelotrichaceaeg__Erysipelotrichaceae_nonames__Clostridium_innocuum		0.000527257			B-325	c__Negativicuteso__Selenomonadalesf__Veillonellaceaeg__Mitsuokellas__Mitsuokella_unclassified	0.000562694		B-293	c__Clostridiao__Clostridialesf__Ruminococcaceaeg__Subdoligranulums__Subdoligranulum_variabile	0.000266237		B-149	c__Bacillio__Lactobacillalesf__Lactobacillaceaeg__Lactobacilluss__Lactobacillus_delbrueckii	0.000107128		B-104	c__Bacteroidiao__Bacteroidalesf__Porphyromonadaceaeg__Porphyromonass__Porphyromonas_bennonis	0.00113566
								B-106	c__Bacteroidiao__Bacteroidalesf__Porphyromonadaceaeg__Porphyromonass__Porphyromonas_somerae		0.00257355		B-281	c__Clostridiao__Clostridialesf__Ruminococcaceaeg__Ruminococcuss__Ruminococcus_albus		0.000518333			B-375	c__Gammaproteobacteriao__Enterobacterialesf__Enterobacteriaceaeg__Morganellas__Morganella_morganii	0.00055559		B-295	c__Erysipelotrichiao__Erysipelotrichalesf__Erysipelotrichaceaeg__Erysipelotrichaceae_nonames__Clostridium_innocuum	0.000250753		B-305	c__Erysipelotrichiao__Erysipelotrichalesf__Erysipelotrichaceaeg__Erysipelotrichaceae_nonames__Erysipelotrichaceae_bacterium_6_1_45	0.000107115		B-5	c__Actinobacteriao__Actinomycetalesf__Actinomycetaceaeg__Actinomycess__Actinomyces_turicensis	0.00111355
								B-306	c__Erysipelotrichiao__Erysipelotrichalesf__Erysipelotrichaceaeg__Erysipelotrichaceae_nonames__Eubacterium_biforme		0.00255545		B-151	c__Bacillio__Lactobacillalesf__Lactobacillaceaeg__Lactobacilluss__Lactobacillus_gasseri		0.000509685			B-163	c__Bacillio__Lactobacillalesf__Streptococcaceaeg__Lactococcuss__Lactococcus_lactis	0.000500995		B-85	c__Bacteroidiao__Bacteroidalesf__Porphyromonadaceaeg__Butyricimonass__Butyricimonas_synergistica	0.000223396		B-378	c__Gammaproteobacteriao__Enterobacterialesf__Enterobacteriaceaeg__Proteuss__Proteus_mirabilis	8.69231e-05		B-341	c__Betaproteobacteriao__Burkholderialesf__Oxalobacteraceaeg__Oxalobacters__Oxalobacter_formigenes	0.00107359
								B-377	c__Gammaproteobacteriao__Enterobacterialesf__Enterobacteriaceaeg__Pantoeas__Pantoea_unclassified		0.00235476		B-180	c__Bacillio__Lactobacillalesf__Streptococcaceaeg__Streptococcuss__Streptococcus_mitis_oralis_pneumoniae		0.000506181			B-135	c__Bacillio__Lactobacillalesf__Enterococcaceaeg__Enterococcuss__Enterococcus_gallinarum	0.000481473		B-302	c__Erysipelotrichiao__Erysipelotrichalesf__Erysipelotrichaceaeg__Erysipelotrichaceae_nonames__Erysipelotrichaceae_bacterium_21_3	0.000216262		B-315	c__Negativicuteso__Selenomonadalesf__Acidaminococcaceaeg__Acidaminococcuss__Acidaminococcus_unclassified	8.33847e-05		B-374	c__Gammaproteobacteriao__Enterobacterialesf__Enterobacteriaceaeg__Klebsiellas__Klebsiella_unclassified	0.00107264
								B-175	c__Bacillio__Lactobacillalesf__Streptococcaceaeg__Streptococcuss__Streptococcus_gordonii		0.00234884		B-118	c__Bacteroidiao__Bacteroidalesf__Prevotellaceaeg__Prevotellas__Prevotella_oralis		0.000498217			B-153	c__Bacillio__Lactobacillalesf__Lactobacillaceaeg__Lactobacilluss__Lactobacillus_oris	0.000460183		B-340	c__Betaproteobacteriao__Neisserialesf__Neisseriaceaeg__Neisserias__Neisseria_unclassified	0.000215802		B-177	c__Bacillio__Lactobacillalesf__Streptococcaceaeg__Streptococcuss__Streptococcus_infantis	7.69231e-05		B-375	c__Gammaproteobacteriao__Enterobacterialesf__Enterobacteriaceaeg__Morganellas__Morganella_morganii	0.00107173
								B-203	c__Clostridiao__Clostridialesf__Lachnospiraceaeg__Blautias__Blautia_producta		0.00234699		B-303	c__Erysipelotrichiao__Erysipelotrichalesf__Erysipelotrichaceaeg__Erysipelotrichaceae_nonames__Erysipelotrichaceae_bacterium_3_1_53		0.000497786			B-319	c__Negativicuteso__Selenomonadalesf__Veillonellaceaeg__Megamonass__Megamonas_funiformis	0.000449186		B-351	c__Epsilonproteobacteriao__Campylobacteralesf__Campylobacteraceaeg__Campylobacters__Campylobacter_ureolyticus	0.000200542		B-104	c__Bacteroidiao__Bacteroidalesf__Porphyromonadaceaeg__Porphyromonass__Porphyromonas_bennonis	7.59693e-05		B-308	c__Erysipelotrichiao__Erysipelotrichalesf__Erysipelotrichaceaeg__Erysipelotrichaceae_nonames__Eubacterium_dolichum	0.00100382
								B-201	c__Clostridiao__Clostridialesf__Lachnospiraceaeg__Blautias__Blautia_hansenii		0.00234029		B-262	c__Clostridiao__Clostridialesf__Lachnospiraceaeg__Lachnospiraceae_nonames__Lachnospiraceae_bacterium_9_1_43BFAA		0.000484507			B-385	c__Gammaproteobacteriao__Enterobacterialesf__Enterobacteriaceaeg__Shigellas__Shigella_flexneri	0.00043507		B-4	c__Actinobacteriao__Actinomycetalesf__Actinomycetaceaeg__Actinomycess__Actinomyces_graevenitzii	0.000185699		B-144	c__Bacillio__Lactobacillalesf__Lactobacillaceaeg__Lactobacilluss__Lactobacillus_acidophilus	6.38535e-05		B-384	c__Gammaproteobacteriao__Pseudomonadalesf__Pseudomonadaceaeg__Pseudomonass__Pseudomonas_unclassified	0.000999868
								B-156	c__Bacillio__Lactobacillalesf__Lactobacillaceaeg__Lactobacilluss__Lactobacillus_rhamnosus		0.00231863		B-238	c__Clostridiao__Clostridialesf__Eubacteriaceaeg__Eubacteriums__Eubacterium_brachy		0.000465154			B-263	c__Clostridiao__Clostridialesf__Lachnospiraceaeg__Marvinbryantias__Marvinbryantia_formatexigens	0.000397185		B-109	c__Bacteroidiao__Bacteroidalesf__Prevotellaceaeg__Prevotellas__Prevotella_bergensis	0.000170648		B-302	c__Erysipelotrichiao__Erysipelotrichalesf__Erysipelotrichaceaeg__Erysipelotrichaceae_nonames__Erysipelotrichaceae_bacterium_21_3	4.25e-05		B-386	c__Gammaproteobacteriao__Enterobacterialesf__Enterobacteriaceaeg__Shigellas__Shigella_sonnei	0.000859079
								B-257	c__Clostridiao__Clostridialesf__Lachnospiraceaeg__Lachnospiraceae_nonames__Lachnospiraceae_bacterium_5_1_57FAA		0.00214609		B-121	c__Bacteroidiao__Bacteroidalesf__Prevotellaceaeg__Prevotellas__Prevotella_timonensis		0.000461481			B-377	c__Gammaproteobacteriao__Enterobacterialesf__Enterobacteriaceaeg__Pantoeas__Pantoea_unclassified	0.000358556		B-270	c__Clostridiao__Clostridialesf__Clostridiales_Family_XI_Incertae_Sedisg__Peptoniphiluss__Peptoniphilus_lacrimalis	0.000156345		B-217	c__Clostridiao__Clostridialesf__Peptostreptococcaceaeg__Peptostreptococcaceae_nonames__Clostridium_difficile	3.38462e-05		B-357	c__Gammaproteobacteriao__Enterobacterialesf__Enterobacteriaceaeg__Citrobacters__Citrobacter_unclassified	0.000785984
								B-188	c__Bacillio__Lactobacillalesf__Streptococcaceaeg__Streptococcuss__Streptococcus_vestibularis		0.00213743		B-368	c__Gammaproteobacteriao__Pasteurellalesf__Pasteurellaceaeg__Haemophiluss__Haemophilus_paraphrohaemolyticus		0.00042114			B-146	c__Bacillio__Lactobacillalesf__Lactobacillaceaeg__Lactobacilluss__Lactobacillus_casei_paracasei	0.00032338		B-111	c__Bacteroidiao__Bacteroidalesf__Prevotellaceaeg__Prevotellas__Prevotella_buccae	0.000138172		B-380	c__Gammaproteobacteriao__Enterobacterialesf__Enterobacteriaceaeg__Proteuss__Proteus_unclassified	3.23077e-05		B-31	c__Actinobacteriao__Coriobacterialesf__Coriobacteriaceaeg__Gordonibacters__Gordonibacter_pamelaeae	0.000770147
								B-132	c__Bacillio__Lactobacillalesf__Enterococcaceaeg__Enterococcuss__Enterococcus_durans		0.00208955		B-312	c__Erysipelotrichiao__Erysipelotrichalesf__Erysipelotrichaceaeg__Turicibacters__Turicibacter_sanguinis		0.00040038			B-248	c__Clostridiao__Clostridialesf__Clostridiales_Family_XI_Incertae_Sedisg__Finegoldias__Finegoldia_magna	0.000316914		B-248	c__Clostridiao__Clostridialesf__Clostridiales_Family_XI_Incertae_Sedisg__Finegoldias__Finegoldia_magna	0.000130108		B-130	c__Bacillio__Lactobacillalesf__Enterococcaceaeg__Enterococcuss__Enterococcus_casseliflavus	1.34615e-05		B-169	c__Bacillio__Bacillalesf__Staphylococcaceaeg__Staphylococcuss__Staphylococcus_epidermidis	0.000765332
								B-229	c__Clostridiao__Clostridialesf__Clostridiaceaeg__Clostridiums__Clostridium_sporogenes		0.00205509		B-274	c__Clostridiao__Clostridialesf__Peptostreptococcaceaeg__Peptostreptococcuss__Peptostreptococcus_unclassified		0.000393524			B-188	c__Bacillio__Lactobacillalesf__Streptococcaceaeg__Streptococcuss__Streptococcus_vestibularis	0.000305251		B-146	c__Bacillio__Lactobacillalesf__Lactobacillaceaeg__Lactobacilluss__Lactobacillus_casei_paracasei	0.000108387		B-38	c__Actinobacteriao__Actinomycetalesf__Micrococcaceaeg__Rothias__Rothia_unclassified	1.30769e-05		B-42	c__Actinobacteriao__Actinomycetalesf__Actinomycetaceaeg__Varibaculums__Varibaculum_cambriense	0.000761039
								B-167	c__Bacillio__Lactobacillalesf__Lactobacillaceaeg__Pediococcuss__Pediococcus_unclassified		0.00185509		B-114	c__Bacteroidiao__Bacteroidalesf__Prevotellaceaeg__Prevotellas__Prevotella_denticola		0.000368333			B-241	c__Clostridiao__Clostridialesf__Eubacteriaceaeg__Eubacteriums__Eubacterium_limosum	0.000300976		B-122	c__Flavobacteriiao__Flavobacterialesf__Flavobacteriaceaeg__Cellulophagas__Cellulophaga_unclassified	0.000104528		B-1	c__Acidobacteriiao__Acidobacterialesf__Acidobacteriaceaeg__Granulicellas__Granulicella_unclassified	0		B-248	c__Clostridiao__Clostridialesf__Clostridiales_Family_XI_Incertae_Sedisg__Finegoldias__Finegoldia_magna	0.000726718
								B-24	c__Actinobacteriao__Coriobacterialesf__Coriobacteriaceaeg__Collinsellas__Collinsella_tanakaei		0.00179374		B-365	c__Gammaproteobacteriao__Pasteurellalesf__Pasteurellaceaeg__Haemophiluss__Haemophilus_haemolyticus		0.0003649			B-193	c__Clostridiao__Clostridialesf__Clostridiales_Family_XI_Incertae_Sedisg__Anaerococcuss__Anaerococcus_vaginalis	0.000290294		B-25	c__Actinobacteriao__Coriobacterialesf__Coriobacteriaceaeg__Collinsellas__Collinsella_unclassified	0.000103877		B-2	c__Actinobacteriao__Actinomycetalesf__Actinomycetaceaeg__Actinobaculums__Actinobaculum_schaalii	0		B-377	c__Gammaproteobacteriao__Enterobacterialesf__Enterobacteriaceaeg__Pantoeas__Pantoea_unclassified	0.000713158
								B-164	c__Bacillio__Lactobacillalesf__Lactobacillaceaeg__Pediococcuss__Pediococcus_acidilactici		0.00173709		B-383	c__Gammaproteobacteriao__Pseudomonadalesf__Pseudomonadaceaeg__Pseudomonass__Pseudomonas_mendocina		0.00031482			B-391	c__Synergistiao__Synergistalesf__Synergistaceaeg__Jonquetellas__Jonquetella_anthropi	0.000271831		B-300	c__Erysipelotrichiao__Erysipelotrichalesf__Erysipelotrichaceaeg__Coprobacilluss__Coprobacillus_unclassified	0.000100968		B-3	c__Actinobacteriao__Actinomycetalesf__Actinomycetaceaeg__Actinobaculums__Actinobaculum_unclassified	0		B-353	c__Gammaproteobacteriao__Pasteurellalesf__Pasteurellaceaeg__Actinobacilluss__Actinobacillus_unclassified	0.000673378
								B-224	c__Clostridiao__Clostridialesf__Clostridiaceaeg__Clostridiums__Clostridium_scindens		0.00168468		B-380	c__Gammaproteobacteriao__Enterobacterialesf__Enterobacteriaceaeg__Proteuss__Proteus_unclassified		0.000314445			B-37	c__Actinobacteriao__Actinomycetalesf__Micrococcaceaeg__Rothias__Rothia_mucilaginosa	0.000266042		B-175	c__Bacillio__Lactobacillalesf__Streptococcaceaeg__Streptococcuss__Streptococcus_gordonii	8.82571e-05		B-4	c__Actinobacteriao__Actinomycetalesf__Actinomycetaceaeg__Actinomycess__Actinomyces_graevenitzii	0		B-217	c__Clostridiao__Clostridialesf__Peptostreptococcaceaeg__Peptostreptococcaceae_nonames__Clostridium_difficile	0.000631504
								B-302	c__Erysipelotrichiao__Erysipelotrichalesf__Erysipelotrichaceaeg__Erysipelotrichaceae_nonames__Erysipelotrichaceae_bacterium_21_3		0.00163226		B-195	c__Clostridiao__Clostridialesf__Lachnospiraceaeg__Anaerostipess__Anaerostipes_caccae		0.000296481			B-355	c__Gammaproteobacteriao__Pasteurellalesf__Pasteurellaceaeg__Aggregatibacters__Aggregatibacter_unclassified	0.00025968		B-28	c__Actinobacteriao__Coriobacterialesf__Coriobacteriaceaeg__Eggerthellas__Eggerthella_lenta	8.73118e-05		B-5	c__Actinobacteriao__Actinomycetalesf__Actinomycetaceaeg__Actinomycess__Actinomyces_turicensis	0		B-163	c__Bacillio__Lactobacillalesf__Streptococcaceaeg__Lactococcuss__Lactococcus_lactis	0.000600317
								B-305	c__Erysipelotrichiao__Erysipelotrichalesf__Erysipelotrichaceaeg__Erysipelotrichaceae_nonames__Erysipelotrichaceae_bacterium_6_1_45		0.00158161		B-163	c__Bacillio__Lactobacillalesf__Streptococcaceaeg__Lactococcuss__Lactococcus_lactis		0.000286503			B-176	c__Bacillio__Lactobacillalesf__Streptococcaceaeg__Streptococcuss__Streptococcus_infantarius	0.000256082		B-27	c__Actinobacteriao__Actinomycetalesf__Corynebacteriaceaeg__Corynebacteriums__Corynebacterium_accolens	8.21505e-05		B-6	c__Actinobacteriao__Actinomycetalesf__Actinomycetaceaeg__Actinomycess__Actinomyces_urogenitalis	0		B-352	c__Gammaproteobacteriao__Pseudomonadalesf__Moraxellaceaeg__Acinetobacters__Acinetobacter_lwoffii	0.000549129
								B-386	c__Gammaproteobacteriao__Enterobacterialesf__Enterobacteriaceaeg__Shigellas__Shigella_sonnei		0.00155664		B-224	c__Clostridiao__Clostridialesf__Clostridiaceaeg__Clostridiums__Clostridium_scindens		0.000258704			B-10	c__Actinobacteriao__Bifidobacterialesf__Bifidobacteriaceaeg__Bifidobacteriums__Bifidobacterium_animalis	0.000249577		B-348	c__Epsilonproteobacteriao__Campylobacteralesf__Campylobacteraceaeg__Campylobacters__Campylobacter_concisus	8.16663e-05		B-8	c__Actinobacteriao__Bifidobacterialesf__Bifidobacteriaceaeg__Alloscardovias__Alloscardovia_omnicolens	0		B-281	c__Clostridiao__Clostridialesf__Ruminococcaceaeg__Ruminococcuss__Ruminococcus_albus	0.000487999
								B-202	c__Clostridiao__Clostridialesf__Lachnospiraceaeg__Blautias__Blautia_hydrogenotrophica		0.00151218		B-69	c__Bacteroidiao__Bacteroidalesf__Bacteroidaceaeg__Bacteroidess__Bacteroides_massiliensis		0.000242972			B-124	c__Deinococcio__Deinococcalesf__Deinococcaceaeg__Deinococcuss__Deinococcus_unclassified	0.000247619		B-188	c__Bacillio__Lactobacillalesf__Streptococcaceaeg__Streptococcuss__Streptococcus_vestibularis	7.75499e-05		B-11	c__Actinobacteriao__Bifidobacterialesf__Bifidobacteriaceaeg__Bifidobacteriums__Bifidobacterium_asteroides	0		B-13	c__Actinobacteriao__Bifidobacterialesf__Bifidobacteriaceaeg__Bifidobacteriums__Bifidobacterium_breve	0.000487433
								B-301	c__Erysipelotrichiao__Erysipelotrichalesf__Erysipelotrichaceaeg__Erysipelotrichaceae_nonames__Erysipelotrichaceae_bacterium_2_2_44A		0.00128468		B-379	c__Gammaproteobacteriao__Enterobacterialesf__Enterobacteriaceaeg__Proteuss__Proteus_penneri		0.000231112			B-380	c__Gammaproteobacteriao__Enterobacterialesf__Enterobacteriaceaeg__Proteuss__Proteus_unclassified	0.00024164		B-31	c__Actinobacteriao__Coriobacterialesf__Coriobacteriaceaeg__Gordonibacters__Gordonibacter_pamelaeae	7.46237e-05		B-18	c__Actinobacteriao__Bifidobacterialesf__Bifidobacteriaceaeg__Bifidobacteriums__Bifidobacterium_pseudolongum	0		B-112	c__Bacteroidiao__Bacteroidalesf__Prevotellaceaeg__Prevotellas__Prevotella_buccalis	0.000441053
								B-143	c__Bacillio__Lactobacillalesf__Carnobacteriaceaeg__Granulicatellas__Granulicatella_unclassified		0.00125072		B-105	c__Bacteroidiao__Bacteroidalesf__Porphyromonadaceaeg__Porphyromonass__Porphyromonas_endodontalis		0.000205813			B-40	c__Actinobacteriao__Bifidobacterialesf__Bifidobacteriaceaeg__Scardovias__Scardovia_wiggsiae	0.000217676		B-41	c__Actinobacteriao__Coriobacterialesf__Coriobacteriaceaeg__Slackias__Slackia_piriformis	7.35484e-05		B-19	c__Actinobacteriao__Actinomycetalesf__Dermabacteraceaeg__Brachybacteriums__Brachybacterium_unclassified	0		B-336	c__Betaproteobacteriao__Burkholderialesf__Burkholderiaceaeg__Burkholderias__Burkholderia_unclassified	0.0004375
								B-275	c__Clostridiao__Clostridialesf__Clostridiales_nonameg__Pseudoflavonifractors__Pseudoflavonifractor_capillosus		0.00113864		B-385	c__Gammaproteobacteriao__Enterobacterialesf__Enterobacteriaceaeg__Shigellas__Shigella_flexneri		0.000189074			B-104	c__Bacteroidiao__Bacteroidalesf__Porphyromonadaceaeg__Porphyromonass__Porphyromonas_bennonis	0.000214519		B-124	c__Deinococcio__Deinococcalesf__Deinococcaceaeg__Deinococcuss__Deinococcus_unclassified	7.32403e-05		B-20	c__Actinobacteriao__Actinomycetalesf__Brevibacteriaceaeg__Brevibacteriums__Brevibacterium_mcbrellneri	0		B-206	c__Clostridiao__Clostridialesf__Lachnospiraceaeg__Butyrivibrios__Butyrivibrio_unclassified	0.000433947
								B-180	c__Bacillio__Lactobacillalesf__Streptococcaceaeg__Streptococcuss__Streptococcus_mitis_oralis_pneumoniae		0.00113504		B-371	c__Gammaproteobacteriao__Enterobacterialesf__Enterobacteriaceaeg__Hafnias__Hafnia_alvei		0.000187555			B-156	c__Bacillio__Lactobacillalesf__Lactobacillaceaeg__Lactobacilluss__Lactobacillus_rhamnosus	0.000207491		B-338	c__Betaproteobacteriao__Burkholderialesf__Comamonadaceaeg__Comamonass__Comamonas_unclassified	7.2287e-05		B-23	c__Actinobacteriao__Coriobacterialesf__Coriobacteriaceaeg__Collinsellas__Collinsella_stercoris	0		B-350	c__Epsilonproteobacteriao__Campylobacteralesf__Campylobacteraceaeg__Campylobacters__Campylobacter_hominis	0.000421711
								B-141	c__Bacillio__Lactobacillalesf__Carnobacteriaceaeg__Granulicatellas__Granulicatella_adiacens		0.0011211		B-201	c__Clostridiao__Clostridialesf__Lachnospiraceaeg__Blautias__Blautia_hansenii		0.000149093			B-333	c__Fusobacteriiao__Fusobacterialesf__Fusobacteriaceaeg__Fusobacteriums__Fusobacterium_nucleatum	0.000197465		B-89	c__Bacteroidiao__Bacteroidalesf__Porphyromonadaceaeg__Dysgonomonass__Dysgonomonas_unclassified	4.66667e-05		B-24	c__Actinobacteriao__Coriobacterialesf__Coriobacteriaceaeg__Collinsellas__Collinsella_tanakaei	0		B-201	c__Clostridiao__Clostridialesf__Lachnospiraceaeg__Blautias__Blautia_hansenii	0.00040632
								B-150	c__Bacillio__Lactobacillalesf__Lactobacillaceaeg__Lactobacilluss__Lactobacillus_fermentum		0.00111984		B-141	c__Bacillio__Lactobacillalesf__Carnobacteriaceaeg__Granulicatellas__Granulicatella_adiacens		0.000130388			B-206	c__Clostridiao__Clostridialesf__Lachnospiraceaeg__Butyrivibrios__Butyrivibrio_unclassified	0.000190704		B-269	c__Clostridiao__Clostridialesf__Clostridiales_Family_XI_Incertae_Sedisg__Peptoniphiluss__Peptoniphilus_harei	4.60215e-05		B-25	c__Actinobacteriao__Coriobacterialesf__Coriobacteriaceaeg__Collinsellas__Collinsella_unclassified	0		B-89	c__Bacteroidiao__Bacteroidalesf__Porphyromonadaceaeg__Dysgonomonass__Dysgonomonas_unclassified	0.000324079
								B-340	c__Betaproteobacteriao__Neisserialesf__Neisseriaceaeg__Neisserias__Neisseria_unclassified		0.00101688		B-366	c__Gammaproteobacteriao__Pasteurellalesf__Pasteurellaceaeg__Haemophiluss__Haemophilus_influenzae		0.000124706			B-341	c__Betaproteobacteriao__Burkholderialesf__Oxalobacteraceaeg__Oxalobacters__Oxalobacter_formigenes	0.000188897		B-361	c__Gammaproteobacteriao__Enterobacterialesf__Enterobacteriaceaeg__Escherichias__Escherichia_albertii	4.5914e-05		B-26	c__Actinobacteriao__Coriobacterialesf__Coriobacteriaceaeg__Coriobacteriaceae_nonames__Coriobacteriaceae_bacterium_phI	0		B-124	c__Deinococcio__Deinococcalesf__Deinococcaceaeg__Deinococcuss__Deinococcus_unclassified	0.000290309
								B-281	c__Clostridiao__Clostridialesf__Ruminococcaceaeg__Ruminococcuss__Ruminococcus_albus		0.00100799		B-190	c__Bacillio__Lactobacillalesf__Leuconostocaceaeg__Weissellas__Weissella_confusa		0.000122778			B-143	c__Bacillio__Lactobacillalesf__Carnobacteriaceaeg__Granulicatellas__Granulicatella_unclassified	0.00018398		B-5	c__Actinobacteriao__Actinomycetalesf__Actinomycetaceaeg__Actinomycess__Actinomyces_turicensis	3.89263e-05		B-27	c__Actinobacteriao__Actinomycetalesf__Corynebacteriaceaeg__Corynebacteriums__Corynebacterium_accolens	0		B-143	c__Bacillio__Lactobacillalesf__Carnobacteriaceaeg__Granulicatellas__Granulicatella_unclassified	0.000280001
								B-104	c__Bacteroidiao__Bacteroidalesf__Porphyromonadaceaeg__Porphyromonass__Porphyromonas_bennonis		0.000978298		B-325	c__Negativicuteso__Selenomonadalesf__Veillonellaceaeg__Mitsuokellas__Mitsuokella_unclassified		0.000114815			B-180	c__Bacillio__Lactobacillalesf__Streptococcaceaeg__Streptococcuss__Streptococcus_mitis_oralis_pneumoniae	0.000180644		B-180	c__Bacillio__Lactobacillalesf__Streptococcaceaeg__Streptococcuss__Streptococcus_mitis_oralis_pneumoniae	3.32258e-05		B-30	c__Actinobacteriao__Bifidobacterialesf__Bifidobacteriaceaeg__Gardnerellas__Gardnerella_vaginalis	0		B-334	c__Fusobacteriiao__Fusobacterialesf__Fusobacteriaceaeg__Fusobacteriums__Fusobacterium_periodonticum	0.000269605
								B-186	c__Bacillio__Lactobacillalesf__Streptococcaceaeg__Streptococcuss__Streptococcus_sanguinis		0.000935404		B-256	c__Clostridiao__Clostridialesf__Lachnospiraceaeg__Lachnospiraceae_nonames__Lachnospiraceae_bacterium_4_1_37FAA		0.000102235			B-150	c__Bacillio__Lactobacillalesf__Lactobacillaceaeg__Lactobacilluss__Lactobacillus_fermentum	0.00017726		B-323	c__Negativicuteso__Selenomonadalesf__Veillonellaceaeg__Megasphaeras__Megasphaera_micronuciformis	1.91398e-05		B-31	c__Actinobacteriao__Coriobacterialesf__Coriobacteriaceaeg__Gordonibacters__Gordonibacter_pamelaeae	0		B-32	c__Actinobacteriao__Actinomycetalesf__Micrococcaceaeg__Kocurias__Kocuria_unclassified	0.000250549
								B-312	c__Erysipelotrichiao__Erysipelotrichalesf__Erysipelotrichaceaeg__Turicibacters__Turicibacter_sanguinis		0.000925818		B-194	c__Clostridiao__Clostridialesf__Eubacteriaceaeg__Anaerofustiss__Anaerofustis_stercorihominis		9.13044e-05			B-38	c__Actinobacteriao__Actinomycetalesf__Micrococcaceaeg__Rothias__Rothia_unclassified	0.000156076		B-138	c__Bacillio__Lactobacillalesf__Aerococcaceaeg__Facklamias__Facklamia_unclassified	1.45161e-05		B-32	c__Actinobacteriao__Actinomycetalesf__Micrococcaceaeg__Kocurias__Kocuria_unclassified	0		B-210	c__Clostridiao__Clostridialesf__Clostridiales_Family_XI_Incertae_Sedisg__Clostridiales_Family_XI_Incertae_Sedis_nonames__Clostridiales_bacterium_BV3C26	0.000246496
								B-310	c__Erysipelotrichiao__Erysipelotrichalesf__Erysipelotrichaceaeg__Holdemanias__Holdemania_unclassified		0.000908615		B-112	c__Bacteroidiao__Bacteroidalesf__Prevotellaceaeg__Prevotellas__Prevotella_buccalis		8.37037e-05			B-285	c__Clostridiao__Clostridialesf__Ruminococcaceaeg__Ruminococcuss__Ruminococcus_flavefaciens	0.000154109		B-358	c__Gammaproteobacteriao__Enterobacterialesf__Enterobacteriaceaeg__Enterobacters__Enterobacter_aerogenes	1.43013e-05		B-33	c__Actinobacteriao__Actinomycetalesf__Micrococcaceaeg__Micrococcuss__Micrococcus_luteus	0		B-135	c__Bacillio__Lactobacillalesf__Enterococcaceaeg__Enterococcuss__Enterococcus_gallinarum	0.000244676
								B-67	c__Bacteroidiao__Bacteroidalesf__Bacteroidaceaeg__Bacteroidess__Bacteroides_gallinarum		0.000862545		B-186	c__Bacillio__Lactobacillalesf__Streptococcaceaeg__Streptococcuss__Streptococcus_sanguinis		7.13383e-05			B-217	c__Clostridiao__Clostridialesf__Peptostreptococcaceaeg__Peptostreptococcaceae_nonames__Clostridium_difficile	0.000148268		B-143	c__Bacillio__Lactobacillalesf__Carnobacteriaceaeg__Granulicatellas__Granulicatella_unclassified	1.3871e-05		B-35	c__Actinobacteriao__Actinomycetalesf__Propionibacteriaceaeg__Propionibacteriums__Propionibacterium_granulosum	0		B-18	c__Actinobacteriao__Bifidobacterialesf__Bifidobacteriaceaeg__Bifidobacteriums__Bifidobacterium_pseudolongum	0.00023034
								B-191	c__Bacillio__Lactobacillalesf__Leuconostocaceaeg__Weissellas__Weissella_unclassified		0.000861998		B-204	c__Clostridiao__Clostridialesf__Clostridiaceaeg__Butyricicoccuss__Butyricicoccus_pullicaecorum		5.91328e-05			B-259	c__Clostridiao__Clostridialesf__Lachnospiraceaeg__Lachnospiraceae_nonames__Lachnospiraceae_bacterium_6_1_63FAA	0.000145493		B-312	c__Erysipelotrichiao__Erysipelotrichalesf__Erysipelotrichaceaeg__Turicibacters__Turicibacter_sanguinis	7.54175e-06		B-36	c__Actinobacteriao__Actinomycetalesf__Micrococcaceaeg__Rothias__Rothia_dentocariosa	0		B-160	c__Bacillio__Lactobacillalesf__Lactobacillaceaeg__Lactobacilluss__Lactobacillus_sanfranciscensis	0.000223421
								B-163	c__Bacillio__Lactobacillalesf__Streptococcaceaeg__Lactococcuss__Lactococcus_lactis		0.000829176		B-31	c__Actinobacteriao__Coriobacterialesf__Coriobacteriaceaeg__Gordonibacters__Gordonibacter_pamelaeae		5.88889e-05			B-22	c__Actinobacteriao__Coriobacterialesf__Coriobacteriaceaeg__Collinsellas__Collinsella_intestinalis	0.000140732		B-186	c__Bacillio__Lactobacillalesf__Streptococcaceaeg__Streptococcuss__Streptococcus_sanguinis	7.08236e-06		B-39	c__Actinobacteriao__Bifidobacterialesf__Bifidobacteriaceaeg__Scardovias__Scardovia_unclassified	0		B-358	c__Gammaproteobacteriao__Enterobacterialesf__Enterobacteriaceaeg__Enterobacters__Enterobacter_aerogenes	0.000219342
								B-158	c__Bacillio__Lactobacillalesf__Lactobacillaceaeg__Lactobacilluss__Lactobacillus_sakei		0.000753091		B-351	c__Epsilonproteobacteriao__Campylobacteralesf__Campylobacteraceaeg__Campylobacters__Campylobacter_ureolyticus		4.92609e-05			B-177	c__Bacillio__Lactobacillalesf__Streptococcaceaeg__Streptococcuss__Streptococcus_infantis	0.000137213		B-163	c__Bacillio__Lactobacillalesf__Streptococcaceaeg__Lactococcuss__Lactococcus_lactis	6.77419e-06		B-40	c__Actinobacteriao__Bifidobacterialesf__Bifidobacteriaceaeg__Scardovias__Scardovia_wiggsiae	0		B-270	c__Clostridiao__Clostridialesf__Clostridiales_Family_XI_Incertae_Sedisg__Peptoniphiluss__Peptoniphilus_lacrimalis	0.000210446
								B-161	c__Bacillio__Lactobacillalesf__Lactobacillaceaeg__Lactobacilluss__Lactobacillus_vaginalis		0.000652903		B-322	c__Negativicuteso__Selenomonadalesf__Veillonellaceaeg__Megamonass__Megamonas_unclassified		4.42593e-05			B-181	c__Bacillio__Lactobacillalesf__Streptococcaceaeg__Streptococcuss__Streptococcus_mutans	0.000124971		B-34	c__Actinobacteriao__Actinomycetalesf__Propionibacteriaceaeg__Propionibacteriums__Propionibacterium_acnes	3.76344e-06		B-41	c__Actinobacteriao__Coriobacterialesf__Coriobacteriaceaeg__Slackias__Slackia_piriformis	0		B-188	c__Bacillio__Lactobacillalesf__Streptococcaceaeg__Streptococcuss__Streptococcus_vestibularis	0.000185789
								B-117	c__Bacteroidiao__Bacteroidalesf__Prevotellaceaeg__Prevotellas__Prevotella_nigrescens		0.000643818		B-13	c__Actinobacteriao__Bifidobacterialesf__Bifidobacteriaceaeg__Bifidobacteriums__Bifidobacterium_breve		4.35185e-05			B-172	c__Bacillio__Lactobacillalesf__Streptococcaceaeg__Streptococcuss__Streptococcus_anginosus	0.000119477		B-1	c__Acidobacteriiao__Acidobacterialesf__Acidobacteriaceaeg__Granulicellas__Granulicella_unclassified	0		B-42	c__Actinobacteriao__Actinomycetalesf__Actinomycetaceaeg__Varibaculums__Varibaculum_cambriense	0		B-348	c__Epsilonproteobacteriao__Campylobacteralesf__Campylobacteraceaeg__Campylobacters__Campylobacter_concisus	0.00018334
								B-303	c__Erysipelotrichiao__Erysipelotrichalesf__Erysipelotrichaceaeg__Erysipelotrichaceae_nonames__Erysipelotrichaceae_bacterium_3_1_53		0.000537292		B-360	c__Gammaproteobacteriao__Enterobacterialesf__Enterobacteriaceaeg__Enterobacteriaceae_nonames__Enterobacteriaceae_bacterium_9_2_54FAA		4.02168e-05			B-122	c__Flavobacteriiao__Flavobacterialesf__Flavobacteriaceaeg__Cellulophagas__Cellulophaga_unclassified	0.000112113		B-2	c__Actinobacteriao__Actinomycetalesf__Actinomycetaceaeg__Actinobaculums__Actinobaculum_schaalii	0		B-43	c__Bacteroidetes_nonameo__Bacteroidetes_nonamef__Bacteroidetes_nonameg__Bacteroidetes_nonames__Bacteroidetes_oral_taxon_274	0		B-385	c__Gammaproteobacteriao__Enterobacterialesf__Enterobacteriaceaeg__Shigellas__Shigella_flexneri	0.000180921
								B-37	c__Actinobacteriao__Actinomycetalesf__Micrococcaceaeg__Rothias__Rothia_mucilaginosa		0.000515577		B-40	c__Actinobacteriao__Bifidobacterialesf__Bifidobacteriaceaeg__Scardovias__Scardovia_wiggsiae		3.7624e-05			B-175	c__Bacillio__Lactobacillalesf__Streptococcaceaeg__Streptococcuss__Streptococcus_gordonii	0.00010031		B-3	c__Actinobacteriao__Actinomycetalesf__Actinomycetaceaeg__Actinobaculums__Actinobaculum_unclassified	0		B-51	c__Bacteroidiao__Bacteroidalesf__Rikenellaceaeg__Alistipess__Alistipes_sp_HGB5	0		B-2	c__Actinobacteriao__Actinomycetalesf__Actinomycetaceaeg__Actinobaculums__Actinobaculum_schaalii	0.000177988
								B-39	c__Actinobacteriao__Bifidobacterialesf__Bifidobacteriaceaeg__Scardovias__Scardovia_unclassified		0.000515273		B-119	c__Bacteroidiao__Bacteroidalesf__Prevotellaceaeg__Prevotellas__Prevotella_oris		3.68519e-05			B-201	c__Clostridiao__Clostridialesf__Lachnospiraceaeg__Blautias__Blautia_hansenii	6.83111e-05		B-6	c__Actinobacteriao__Actinomycetalesf__Actinomycetaceaeg__Actinomycess__Actinomyces_urogenitalis	0		B-53	c__Bacteroidiao__Bacteroidalesf__Prevotellaceaeg__Alloprevotellas__Alloprevotella_tannerae	0		B-340	c__Betaproteobacteriao__Neisserialesf__Neisseriaceaeg__Neisserias__Neisseria_unclassified	0.000176711
								B-92	c__Bacteroidiao__Bacteroidalesf__Porphyromonadaceaeg__Odoribacters__Odoribacter_unclassified		0.000508727		B-259	c__Clostridiao__Clostridialesf__Lachnospiraceaeg__Lachnospiraceae_nonames__Lachnospiraceae_bacterium_6_1_63FAA		3.61161e-05			B-28	c__Actinobacteriao__Coriobacterialesf__Coriobacteriaceaeg__Eggerthellas__Eggerthella_lenta	6.40845e-05		B-8	c__Actinobacteriao__Bifidobacterialesf__Bifidobacteriaceaeg__Alloscardovias__Alloscardovia_omnicolens	0		B-54	c__Bacteroidiao__Bacteroidalesf__Prevotellaceaeg__Alloprevotellas__Alloprevotella_unclassified	0		B-37	c__Actinobacteriao__Actinomycetalesf__Micrococcaceaeg__Rothias__Rothia_mucilaginosa	0.000164211
								B-383	c__Gammaproteobacteriao__Pseudomonadalesf__Pseudomonadaceaeg__Pseudomonass__Pseudomonas_mendocina		0.000503541		B-355	c__Gammaproteobacteriao__Pasteurellalesf__Pasteurellaceaeg__Aggregatibacters__Aggregatibacter_unclassified		3.38889e-05			B-354	c__Gammaproteobacteriao__Pasteurellalesf__Pasteurellaceaeg__Aggregatibacters__Aggregatibacter_segnis	5.9506e-05		B-10	c__Actinobacteriao__Bifidobacterialesf__Bifidobacteriaceaeg__Bifidobacteriums__Bifidobacterium_animalis	0		B-56	c__Bacteroidiao__Bacteroidalesf__Bacteroidaceaeg__Bacteroidess__Bacteroides_barnesiae	0		B-126	c__Bacillio__Lactobacillalesf__Aerococcaceaeg__Aerococcuss__Aerococcus_viridans	0.000147384
								B-353	c__Gammaproteobacteriao__Pasteurellalesf__Pasteurellaceaeg__Actinobacilluss__Actinobacillus_unclassified		0.000484573		B-370	c__Gammaproteobacteriao__Pasteurellalesf__Pasteurellaceaeg__Haemophiluss__Haemophilus_sputorum		2.14426e-05			B-376	c__Gammaproteobacteriao__Enterobacterialesf__Enterobacteriaceaeg__Pantoeas__Pantoea_ananatis	4.87324e-05		B-11	c__Actinobacteriao__Bifidobacterialesf__Bifidobacteriaceaeg__Bifidobacteriums__Bifidobacterium_asteroides	0		B-59	c__Bacteroidiao__Bacteroidalesf__Bacteroidaceaeg__Bacteroidess__Bacteroides_clarus	0		B-146	c__Bacillio__Lactobacillalesf__Lactobacillaceaeg__Lactobacilluss__Lactobacillus_casei_paracasei	0.000145237
								B-214	c__Clostridiao__Clostridialesf__Clostridiaceaeg__Clostridiums__Clostridium_butyricum		0.000471		B-308	c__Erysipelotrichiao__Erysipelotrichalesf__Erysipelotrichaceaeg__Erysipelotrichaceae_nonames__Eubacterium_dolichum		1.57414e-05			B-36	c__Actinobacteriao__Actinomycetalesf__Micrococcaceaeg__Rothias__Rothia_dentocariosa	4.32537e-05		B-13	c__Actinobacteriao__Bifidobacterialesf__Bifidobacteriaceaeg__Bifidobacteriums__Bifidobacterium_breve	0		B-60	c__Bacteroidiao__Bacteroidalesf__Bacteroidaceaeg__Bacteroidess__Bacteroides_coprocola	0		B-35	c__Actinobacteriao__Actinomycetalesf__Propionibacteriaceaeg__Propionibacteriums__Propionibacterium_granulosum	0.000111974
								B-103	c__Bacteroidiao__Bacteroidalesf__Porphyromonadaceaeg__Porphyromonass__Porphyromonas_asaccharolytica		0.000464612		B-1	c__Acidobacteriiao__Acidobacterialesf__Acidobacteriaceaeg__Granulicellas__Granulicella_unclassified		0			B-303	c__Erysipelotrichiao__Erysipelotrichalesf__Erysipelotrichaceaeg__Erysipelotrichaceae_nonames__Erysipelotrichaceae_bacterium_3_1_53	4.32394e-05		B-18	c__Actinobacteriao__Bifidobacterialesf__Bifidobacteriaceaeg__Bifidobacteriums__Bifidobacterium_pseudolongum	0		B-67	c__Bacteroidiao__Bacteroidalesf__Bacteroidaceaeg__Bacteroidess__Bacteroides_gallinarum	0		B-162	c__Bacillio__Lactobacillalesf__Streptococcaceaeg__Lactococcuss__Lactococcus_garvieae	0.000111447
								B-325	c__Negativicuteso__Selenomonadalesf__Veillonellaceaeg__Mitsuokellas__Mitsuokella_unclassified		0.000453456		B-2	c__Actinobacteriao__Actinomycetalesf__Actinomycetaceaeg__Actinobaculums__Actinobaculum_schaalii		0			B-312	c__Erysipelotrichiao__Erysipelotrichalesf__Erysipelotrichaceaeg__Turicibacters__Turicibacter_sanguinis	4.08451e-05		B-19	c__Actinobacteriao__Actinomycetalesf__Dermabacteraceaeg__Brachybacteriums__Brachybacterium_unclassified	0		B-68	c__Bacteroidiao__Bacteroidalesf__Bacteroidaceaeg__Bacteroidess__Bacteroides_intestinalis	0		B-28	c__Actinobacteriao__Coriobacterialesf__Coriobacteriaceaeg__Eggerthellas__Eggerthella_lenta	0.000108953
								B-218	c__Clostridiao__Clostridialesf__Peptostreptococcaceaeg__Peptostreptococcaceae_nonames__Clostridium_glycolicum		0.000408182		B-3	c__Actinobacteriao__Actinomycetalesf__Actinomycetaceaeg__Actinobaculums__Actinobaculum_unclassified		0			B-41	c__Actinobacteriao__Coriobacterialesf__Coriobacteriaceaeg__Slackias__Slackia_piriformis	3.97195e-05		B-20	c__Actinobacteriao__Actinomycetalesf__Brevibacteriaceaeg__Brevibacteriums__Brevibacterium_mcbrellneri	0		B-71	c__Bacteroidiao__Bacteroidalesf__Bacteroidaceaeg__Bacteroidess__Bacteroides_oleiciplenus	0		B-122	c__Flavobacteriiao__Flavobacterialesf__Flavobacteriaceaeg__Cellulophagas__Cellulophaga_unclassified	0.000105132
								B-313	c__Erysipelotrichiao__Erysipelotrichalesf__Erysipelotrichaceaeg__Turicibacters__Turicibacter_unclassified		0.000374818		B-4	c__Actinobacteriao__Actinomycetalesf__Actinomycetaceaeg__Actinomycess__Actinomyces_graevenitzii		0			B-186	c__Bacillio__Lactobacillalesf__Streptococcaceaeg__Streptococcuss__Streptococcus_sanguinis	3.80282e-05		B-23	c__Actinobacteriao__Coriobacterialesf__Coriobacteriaceaeg__Collinsellas__Collinsella_stercoris	0		B-75	c__Bacteroidiao__Bacteroidalesf__Bacteroidaceaeg__Bacteroidess__Bacteroides_sp_1_1_30	0		B-330	c__Negativicuteso__Selenomonadalesf__Veillonellaceaeg__Veillonellas__Veillonella_ratti	0.0001025
								B-349	c__Epsilonproteobacteriao__Campylobacteralesf__Campylobacteraceaeg__Campylobacters__Campylobacter_gracilis		0.000358636		B-5	c__Actinobacteriao__Actinomycetalesf__Actinomycetaceaeg__Actinomycess__Actinomyces_turicensis		0			B-220	c__Clostridiao__Clostridialesf__Clostridiaceaeg__Clostridiums__Clostridium_hylemonae	2.56338e-05		B-24	c__Actinobacteriao__Coriobacterialesf__Coriobacteriaceaeg__Collinsellas__Collinsella_tanakaei	0		B-76	c__Bacteroidiao__Bacteroidalesf__Bacteroidaceaeg__Bacteroidess__Bacteroides_sp_1_1_6	0		B-183	c__Bacillio__Lactobacillalesf__Streptococcaceaeg__Streptococcuss__Streptococcus_peroris	9.0811e-05
								B-125	c__Bacillio__Lactobacillalesf__Aerococcaceaeg__Abiotrophias__Abiotrophia_defectiva		0.000341414		B-6	c__Actinobacteriao__Actinomycetalesf__Actinomycetaceaeg__Actinomycess__Actinomyces_urogenitalis		0			B-89	c__Bacteroidiao__Bacteroidalesf__Porphyromonadaceaeg__Dysgonomonass__Dysgonomonas_unclassified	2.22654e-05		B-30	c__Actinobacteriao__Bifidobacterialesf__Bifidobacteriaceaeg__Gardnerellas__Gardnerella_vaginalis	0		B-78	c__Bacteroidiao__Bacteroidalesf__Bacteroidaceaeg__Bacteroidess__Bacteroides_sp_3_2_5	0		B-150	c__Bacillio__Lactobacillalesf__Lactobacillaceaeg__Lactobacilluss__Lactobacillus_fermentum	8.51316e-05
								B-154	c__Bacillio__Lactobacillalesf__Lactobacillaceaeg__Lactobacilluss__Lactobacillus_plantarum		0.000339909		B-8	c__Actinobacteriao__Bifidobacterialesf__Bifidobacteriaceaeg__Alloscardovias__Alloscardovia_omnicolens		0			B-304	c__Erysipelotrichiao__Erysipelotrichalesf__Erysipelotrichaceaeg__Erysipelotrichaceae_nonames__Erysipelotrichaceae_bacterium_5_2_54FAA	1.78873e-05		B-32	c__Actinobacteriao__Actinomycetalesf__Micrococcaceaeg__Kocurias__Kocuria_unclassified	0		B-80	c__Bacteroidiao__Bacteroidalesf__Bacteroidaceaeg__Bacteroidess__Bacteroides_sp_9_1_42FAA	0		B-33	c__Actinobacteriao__Actinomycetalesf__Micrococcaceaeg__Micrococcuss__Micrococcus_luteus	7.61842e-05
								B-379	c__Gammaproteobacteriao__Enterobacterialesf__Enterobacteriaceaeg__Proteuss__Proteus_penneri		0.000338641		B-11	c__Actinobacteriao__Bifidobacterialesf__Bifidobacteriaceaeg__Bifidobacteriums__Bifidobacterium_asteroides		0			B-109	c__Bacteroidiao__Bacteroidalesf__Prevotellaceaeg__Prevotellas__Prevotella_bergensis	1.64789e-05		B-33	c__Actinobacteriao__Actinomycetalesf__Micrococcaceaeg__Micrococcuss__Micrococcus_luteus	0		B-85	c__Bacteroidiao__Bacteroidalesf__Porphyromonadaceaeg__Butyricimonass__Butyricimonas_synergistica	0		B-3	c__Actinobacteriao__Actinomycetalesf__Actinomycetaceaeg__Actinobaculums__Actinobaculum_unclassified	7.2898e-05
								B-14	c__Actinobacteriao__Bifidobacterialesf__Bifidobacteriaceaeg__Bifidobacteriums__Bifidobacterium_catenulatum		0.000335091		B-18	c__Actinobacteriao__Bifidobacterialesf__Bifidobacteriaceaeg__Bifidobacteriums__Bifidobacterium_pseudolongum		0			B-145	c__Bacillio__Lactobacillalesf__Lactobacillaceaeg__Lactobacilluss__Lactobacillus_animalis	6.48073e-06		B-35	c__Actinobacteriao__Actinomycetalesf__Propionibacteriaceaeg__Propionibacteriums__Propionibacterium_granulosum	0		B-87	c__Bacteroidiao__Bacteroidalesf__Porphyromonadaceaeg__Dysgonomonass__Dysgonomonas_gadei	0		B-177	c__Bacillio__Lactobacillalesf__Streptococcaceaeg__Streptococcuss__Streptococcus_infantis	6.96218e-05
								B-177	c__Bacillio__Lactobacillalesf__Streptococcaceaeg__Streptococcuss__Streptococcus_infantis		0.000334645		B-19	c__Actinobacteriao__Actinomycetalesf__Dermabacteraceaeg__Brachybacteriums__Brachybacterium_unclassified		0			B-268	c__Clostridiao__Clostridialesf__Clostridiales_Family_XI_Incertae_Sedisg__Parvimonass__Parvimonas_unclassified	5.35211e-06		B-36	c__Actinobacteriao__Actinomycetalesf__Micrococcaceaeg__Rothias__Rothia_dentocariosa	0		B-88	c__Bacteroidiao__Bacteroidalesf__Porphyromonadaceaeg__Dysgonomonass__Dysgonomonas_mossii	0		B-180	c__Bacillio__Lactobacillalesf__Streptococcaceaeg__Streptococcuss__Streptococcus_mitis_oralis_pneumoniae	6.7516e-05
								B-347	c__Deltaproteobacteriao__Desulfovibrionalesf__Desulfovibrionaceaeg__Desulfovibrios__Desulfovibrio_piger		0.000330182		B-20	c__Actinobacteriao__Actinomycetalesf__Brevibacteriaceaeg__Brevibacteriums__Brevibacterium_mcbrellneri		0			B-1	c__Acidobacteriiao__Acidobacterialesf__Acidobacteriaceaeg__Granulicellas__Granulicella_unclassified	0		B-38	c__Actinobacteriao__Actinomycetalesf__Micrococcaceaeg__Rothias__Rothia_unclassified	0		B-89	c__Bacteroidiao__Bacteroidalesf__Porphyromonadaceaeg__Dysgonomonass__Dysgonomonas_unclassified	0		B-54	c__Bacteroidiao__Bacteroidalesf__Prevotellaceaeg__Alloprevotellas__Alloprevotella_unclassified	6.71053e-05
								B-195	c__Clostridiao__Clostridialesf__Lachnospiraceaeg__Anaerostipess__Anaerostipes_caccae		0.000322906		B-22	c__Actinobacteriao__Coriobacterialesf__Coriobacteriaceaeg__Collinsellas__Collinsella_intestinalis		0			B-2	c__Actinobacteriao__Actinomycetalesf__Actinomycetaceaeg__Actinobaculums__Actinobaculum_schaalii	0		B-39	c__Actinobacteriao__Bifidobacterialesf__Bifidobacteriaceaeg__Scardovias__Scardovia_unclassified	0		B-90	c__Bacteroidiao__Bacteroidalesf__Porphyromonadaceaeg__Odoribacters__Odoribacter_laneus	0		B-120	c__Bacteroidiao__Bacteroidalesf__Prevotellaceaeg__Prevotellas__Prevotella_stercorea	6.17105e-05
								B-380	c__Gammaproteobacteriao__Enterobacterialesf__Enterobacteriaceaeg__Proteuss__Proteus_unclassified		0.000295902		B-24	c__Actinobacteriao__Coriobacterialesf__Coriobacteriaceaeg__Collinsellas__Collinsella_tanakaei		0			B-3	c__Actinobacteriao__Actinomycetalesf__Actinomycetaceaeg__Actinobaculums__Actinobaculum_unclassified	0		B-40	c__Actinobacteriao__Bifidobacterialesf__Bifidobacteriaceaeg__Scardovias__Scardovia_wiggsiae	0		B-95	c__Bacteroidiao__Bacteroidalesf__Porphyromonadaceaeg__Parabacteroidess__Parabacteroides_johnsonii	0		B-121	c__Bacteroidiao__Bacteroidalesf__Prevotellaceaeg__Prevotellas__Prevotella_timonensis	5.76e-05
								B-332	c__Fusobacteriiao__Fusobacterialesf__Fusobacteriaceaeg__Fusobacteriums__Fusobacterium_mortiferum		0.000281364		B-25	c__Actinobacteriao__Coriobacterialesf__Coriobacteriaceaeg__Collinsellas__Collinsella_unclassified		0			B-4	c__Actinobacteriao__Actinomycetalesf__Actinomycetaceaeg__Actinomycess__Actinomyces_graevenitzii	0		B-42	c__Actinobacteriao__Actinomycetalesf__Actinomycetaceaeg__Varibaculums__Varibaculum_cambriense	0		B-97	c__Bacteroidiao__Bacteroidalesf__Porphyromonadaceaeg__Parabacteroidess__Parabacteroides_sp_20_3	0		B-59	c__Bacteroidiao__Bacteroidalesf__Bacteroidaceaeg__Bacteroidess__Bacteroides_clarus	5.01369e-05
								B-189	c__Bacillio__Lactobacillalesf__Leuconostocaceaeg__Weissellas__Weissella_cibaria		0.000279802		B-26	c__Actinobacteriao__Coriobacterialesf__Coriobacteriaceaeg__Coriobacteriaceae_nonames__Coriobacteriaceae_bacterium_phI		0			B-6	c__Actinobacteriao__Actinomycetalesf__Actinomycetaceaeg__Actinomycess__Actinomyces_urogenitalis	0		B-43	c__Bacteroidetes_nonameo__Bacteroidetes_nonamef__Bacteroidetes_nonameg__Bacteroidetes_nonames__Bacteroidetes_oral_taxon_274	0		B-98	c__Bacteroidiao__Bacteroidalesf__Porphyromonadaceaeg__Parabacteroidess__Parabacteroides_sp_D13	0		B-313	c__Erysipelotrichiao__Erysipelotrichalesf__Erysipelotrichaceaeg__Turicibacters__Turicibacter_unclassified	5e-05
								B-28	c__Actinobacteriao__Coriobacterialesf__Coriobacteriaceaeg__Eggerthellas__Eggerthella_lenta		0.000256455		B-27	c__Actinobacteriao__Actinomycetalesf__Corynebacteriaceaeg__Corynebacteriums__Corynebacterium_accolens		0			B-8	c__Actinobacteriao__Bifidobacterialesf__Bifidobacteriaceaeg__Alloscardovias__Alloscardovia_omnicolens	0		B-51	c__Bacteroidiao__Bacteroidalesf__Rikenellaceaeg__Alistipess__Alistipes_sp_HGB5	0		B-103	c__Bacteroidiao__Bacteroidalesf__Porphyromonadaceaeg__Porphyromonass__Porphyromonas_asaccharolytica	0		B-190	c__Bacillio__Lactobacillalesf__Leuconostocaceaeg__Weissellas__Weissella_confusa	4.88158e-05
								B-304	c__Erysipelotrichiao__Erysipelotrichalesf__Erysipelotrichaceaeg__Erysipelotrichaceae_nonames__Erysipelotrichaceae_bacterium_5_2_54FAA		0.000236818		B-30	c__Actinobacteriao__Bifidobacterialesf__Bifidobacteriaceaeg__Gardnerellas__Gardnerella_vaginalis		0			B-11	c__Actinobacteriao__Bifidobacterialesf__Bifidobacteriaceaeg__Bifidobacteriums__Bifidobacterium_asteroides	0		B-53	c__Bacteroidiao__Bacteroidalesf__Prevotellaceaeg__Alloprevotellas__Alloprevotella_tannerae	0		B-106	c__Bacteroidiao__Bacteroidalesf__Porphyromonadaceaeg__Porphyromonass__Porphyromonas_somerae	0		B-285	c__Clostridiao__Clostridialesf__Ruminococcaceaeg__Ruminococcuss__Ruminococcus_flavefaciens	3.1063e-05
								B-285	c__Clostridiao__Clostridialesf__Ruminococcaceaeg__Ruminococcuss__Ruminococcus_flavefaciens		0.000236373		B-32	c__Actinobacteriao__Actinomycetalesf__Micrococcaceaeg__Kocurias__Kocuria_unclassified		0			B-14	c__Actinobacteriao__Bifidobacterialesf__Bifidobacteriaceaeg__Bifidobacteriums__Bifidobacterium_catenulatum	0		B-54	c__Bacteroidiao__Bacteroidalesf__Prevotellaceaeg__Alloprevotellas__Alloprevotella_unclassified	0		B-107	c__Bacteroidiao__Bacteroidalesf__Porphyromonadaceaeg__Porphyromonass__Porphyromonas_uenonis	0		B-41	c__Actinobacteriao__Coriobacterialesf__Coriobacteriaceaeg__Slackias__Slackia_piriformis	2.68481e-05
								B-322	c__Negativicuteso__Selenomonadalesf__Veillonellaceaeg__Megamonass__Megamonas_unclassified		0.000235003		B-33	c__Actinobacteriao__Actinomycetalesf__Micrococcaceaeg__Micrococcuss__Micrococcus_luteus		0			B-18	c__Actinobacteriao__Bifidobacterialesf__Bifidobacteriaceaeg__Bifidobacteriums__Bifidobacterium_pseudolongum	0		B-65	c__Bacteroidiao__Bacteroidalesf__Bacteroidaceaeg__Bacteroidess__Bacteroides_fluxus	0		B-108	c__Bacteroidiao__Bacteroidalesf__Prevotellaceaeg__Prevotellas__Prevotella_amnii	0		B-274	c__Clostridiao__Clostridialesf__Peptostreptococcaceaeg__Peptostreptococcuss__Peptostreptococcus_unclassified	2.68437e-05
								B-40	c__Actinobacteriao__Bifidobacterialesf__Bifidobacteriaceaeg__Scardovias__Scardovia_wiggsiae		0.000221636		B-35	c__Actinobacteriao__Actinomycetalesf__Propionibacteriaceaeg__Propionibacteriums__Propionibacterium_granulosum		0			B-19	c__Actinobacteriao__Actinomycetalesf__Dermabacteraceaeg__Brachybacteriums__Brachybacterium_unclassified	0		B-67	c__Bacteroidiao__Bacteroidalesf__Bacteroidaceaeg__Bacteroidess__Bacteroides_gallinarum	0		B-109	c__Bacteroidiao__Bacteroidalesf__Prevotellaceaeg__Prevotellas__Prevotella_bergensis	0		B-262	c__Clostridiao__Clostridialesf__Lachnospiraceaeg__Lachnospiraceae_nonames__Lachnospiraceae_bacterium_9_1_43BFAA	2.56579e-05
								B-388	c__Spirochaetiao__Spirochaetalesf__Brachyspiraceaeg__Brachyspiras__Brachyspira_unclassified		0.000208636		B-36	c__Actinobacteriao__Actinomycetalesf__Micrococcaceaeg__Rothias__Rothia_dentocariosa		0			B-20	c__Actinobacteriao__Actinomycetalesf__Brevibacteriaceaeg__Brevibacteriums__Brevibacterium_mcbrellneri	0		B-75	c__Bacteroidiao__Bacteroidalesf__Bacteroidaceaeg__Bacteroidess__Bacteroides_sp_1_1_30	0		B-110	c__Bacteroidiao__Bacteroidalesf__Prevotellaceaeg__Prevotellas__Prevotella_bivia	0		B-19	c__Actinobacteriao__Actinomycetalesf__Dermabacteraceaeg__Brachybacteriums__Brachybacterium_unclassified	2.03966e-05
								B-348	c__Epsilonproteobacteriao__Campylobacteralesf__Campylobacteraceaeg__Campylobacters__Campylobacter_concisus		0.000207706		B-38	c__Actinobacteriao__Actinomycetalesf__Micrococcaceaeg__Rothias__Rothia_unclassified		0			B-26	c__Actinobacteriao__Coriobacterialesf__Coriobacteriaceaeg__Coriobacteriaceae_nonames__Coriobacteriaceae_bacterium_phI	0		B-80	c__Bacteroidiao__Bacteroidalesf__Bacteroidaceaeg__Bacteroidess__Bacteroides_sp_9_1_42FAA	0		B-111	c__Bacteroidiao__Bacteroidalesf__Prevotellaceaeg__Prevotellas__Prevotella_buccae	0		B-218	c__Clostridiao__Clostridialesf__Peptostreptococcaceaeg__Peptostreptococcaceae_nonames__Clostridium_glycolicum	6.58084e-06
								B-43	c__Bacteroidetes_nonameo__Bacteroidetes_nonamef__Bacteroidetes_nonameg__Bacteroidetes_nonames__Bacteroidetes_oral_taxon_274		0.000205818		B-39	c__Actinobacteriao__Bifidobacterialesf__Bifidobacteriaceaeg__Scardovias__Scardovia_unclassified		0			B-27	c__Actinobacteriao__Actinomycetalesf__Corynebacteriaceaeg__Corynebacteriums__Corynebacterium_accolens	0		B-87	c__Bacteroidiao__Bacteroidalesf__Porphyromonadaceaeg__Dysgonomonass__Dysgonomonas_gadei	0		B-114	c__Bacteroidiao__Bacteroidalesf__Prevotellaceaeg__Prevotellas__Prevotella_denticola	0		B-268	c__Clostridiao__Clostridialesf__Clostridiales_Family_XI_Incertae_Sedisg__Parvimonass__Parvimonas_unclassified	5.26346e-06
								B-159	c__Bacillio__Lactobacillalesf__Lactobacillaceaeg__Lactobacilluss__Lactobacillus_salivarius		0.000204814		B-41	c__Actinobacteriao__Coriobacterialesf__Coriobacteriaceaeg__Slackias__Slackia_piriformis		0			B-31	c__Actinobacteriao__Coriobacterialesf__Coriobacteriaceaeg__Gordonibacters__Gordonibacter_pamelaeae	0		B-88	c__Bacteroidiao__Bacteroidalesf__Porphyromonadaceaeg__Dysgonomonass__Dysgonomonas_mossii	0		B-115	c__Bacteroidiao__Bacteroidalesf__Prevotellaceaeg__Prevotellas__Prevotella_disiens	0		B-109	c__Bacteroidiao__Bacteroidalesf__Prevotellaceaeg__Prevotellas__Prevotella_bergensis	3.94737e-06
								B-71	c__Bacteroidiao__Bacteroidalesf__Bacteroidaceaeg__Bacteroidess__Bacteroides_oleiciplenus		0.000199637		B-42	c__Actinobacteriao__Actinomycetalesf__Actinomycetaceaeg__Varibaculums__Varibaculum_cambriense		0			B-32	c__Actinobacteriao__Actinomycetalesf__Micrococcaceaeg__Kocurias__Kocuria_unclassified	0		B-97	c__Bacteroidiao__Bacteroidalesf__Porphyromonadaceaeg__Parabacteroidess__Parabacteroides_sp_20_3	0		B-116	c__Bacteroidiao__Bacteroidalesf__Prevotellaceaeg__Prevotellas__Prevotella_melaninogenica	0		B-1	c__Acidobacteriiao__Acidobacterialesf__Acidobacteriaceaeg__Granulicellas__Granulicella_unclassified	0
								B-256	c__Clostridiao__Clostridialesf__Lachnospiraceaeg__Lachnospiraceae_nonames__Lachnospiraceae_bacterium_4_1_37FAA		0.000187558		B-43	c__Bacteroidetes_nonameo__Bacteroidetes_nonamef__Bacteroidetes_nonameg__Bacteroidetes_nonames__Bacteroidetes_oral_taxon_274		0			B-33	c__Actinobacteriao__Actinomycetalesf__Micrococcaceaeg__Micrococcuss__Micrococcus_luteus	0		B-105	c__Bacteroidiao__Bacteroidalesf__Porphyromonadaceaeg__Porphyromonass__Porphyromonas_endodontalis	0		B-117	c__Bacteroidiao__Bacteroidalesf__Prevotellaceaeg__Prevotellas__Prevotella_nigrescens	0		B-4	c__Actinobacteriao__Actinomycetalesf__Actinomycetaceaeg__Actinomycess__Actinomyces_graevenitzii	0
								B-381	c__Gammaproteobacteriao__Enterobacterialesf__Enterobacteriaceaeg__Providencias__Providencia_unclassified		0.000181158		B-51	c__Bacteroidiao__Bacteroidalesf__Rikenellaceaeg__Alistipess__Alistipes_sp_HGB5		0			B-35	c__Actinobacteriao__Actinomycetalesf__Propionibacteriaceaeg__Propionibacteriums__Propionibacterium_granulosum	0		B-108	c__Bacteroidiao__Bacteroidalesf__Prevotellaceaeg__Prevotellas__Prevotella_amnii	0		B-118	c__Bacteroidiao__Bacteroidalesf__Prevotellaceaeg__Prevotellas__Prevotella_oralis	0		B-6	c__Actinobacteriao__Actinomycetalesf__Actinomycetaceaeg__Actinomycess__Actinomyces_urogenitalis	0
								B-23	c__Actinobacteriao__Coriobacterialesf__Coriobacteriaceaeg__Collinsellas__Collinsella_stercoris		0.000176401		B-52	c__Bacteroidiao__Bacteroidalesf__Rikenellaceaeg__Alistipess__Alistipes_unclassified		0			B-39	c__Actinobacteriao__Bifidobacterialesf__Bifidobacteriaceaeg__Scardovias__Scardovia_unclassified	0		B-114	c__Bacteroidiao__Bacteroidalesf__Prevotellaceaeg__Prevotellas__Prevotella_denticola	0		B-119	c__Bacteroidiao__Bacteroidalesf__Prevotellaceaeg__Prevotellas__Prevotella_oris	0		B-8	c__Actinobacteriao__Bifidobacterialesf__Bifidobacteriaceaeg__Alloscardovias__Alloscardovia_omnicolens	0
								B-139	c__Bacillio__Bacillalesf__Bacillales_nonameg__Gemellas__Gemella_haemolysans		0.00017423		B-54	c__Bacteroidiao__Bacteroidalesf__Prevotellaceaeg__Alloprevotellas__Alloprevotella_unclassified		0			B-42	c__Actinobacteriao__Actinomycetalesf__Actinomycetaceaeg__Varibaculums__Varibaculum_cambriense	0		B-116	c__Bacteroidiao__Bacteroidalesf__Prevotellaceaeg__Prevotellas__Prevotella_melaninogenica	0		B-123	c__Sphingobacteriiao__Sphingobacterialesf__Sphingobacteriaceaeg__Pedobacters__Pedobacter_unclassified	0		B-11	c__Actinobacteriao__Bifidobacterialesf__Bifidobacteriaceaeg__Bifidobacteriums__Bifidobacterium_asteroides	0
								B-26	c__Actinobacteriao__Coriobacterialesf__Coriobacteriaceaeg__Coriobacteriaceae_nonames__Coriobacteriaceae_bacterium_phI		0.000170181		B-56	c__Bacteroidiao__Bacteroidalesf__Bacteroidaceaeg__Bacteroidess__Bacteroides_barnesiae		0			B-43	c__Bacteroidetes_nonameo__Bacteroidetes_nonamef__Bacteroidetes_nonameg__Bacteroidetes_nonames__Bacteroidetes_oral_taxon_274	0		B-117	c__Bacteroidiao__Bacteroidalesf__Prevotellaceaeg__Prevotellas__Prevotella_nigrescens	0		B-125	c__Bacillio__Lactobacillalesf__Aerococcaceaeg__Abiotrophias__Abiotrophia_defectiva	0		B-15	c__Actinobacteriao__Bifidobacterialesf__Bifidobacteriaceaeg__Bifidobacteriums__Bifidobacterium_dentium	0
								B-336	c__Betaproteobacteriao__Burkholderialesf__Burkholderiaceaeg__Burkholderias__Burkholderia_unclassified		0.000159273		B-60	c__Bacteroidiao__Bacteroidalesf__Bacteroidaceaeg__Bacteroidess__Bacteroides_coprocola		0			B-53	c__Bacteroidiao__Bacteroidalesf__Prevotellaceaeg__Alloprevotellas__Alloprevotella_tannerae	0		B-118	c__Bacteroidiao__Bacteroidalesf__Prevotellaceaeg__Prevotellas__Prevotella_oralis	0		B-126	c__Bacillio__Lactobacillalesf__Aerococcaceaeg__Aerococcuss__Aerococcus_viridans	0		B-20	c__Actinobacteriao__Actinomycetalesf__Brevibacteriaceaeg__Brevibacteriums__Brevibacterium_mcbrellneri	0
								B-272	c__Clostridiao__Clostridialesf__Peptostreptococcaceaeg__Peptostreptococcuss__Peptostreptococcus_anaerobius		0.000147636		B-65	c__Bacteroidiao__Bacteroidalesf__Bacteroidaceaeg__Bacteroidess__Bacteroides_fluxus		0			B-54	c__Bacteroidiao__Bacteroidalesf__Prevotellaceaeg__Alloprevotellas__Alloprevotella_unclassified	0		B-119	c__Bacteroidiao__Bacteroidalesf__Prevotellaceaeg__Prevotellas__Prevotella_oris	0		B-127	c__Bacillio__Bacillalesf__Bacillaceaeg__Bacilluss__Bacillus_licheniformis	0		B-26	c__Actinobacteriao__Coriobacterialesf__Coriobacteriaceaeg__Coriobacteriaceae_nonames__Coriobacteriaceae_bacterium_phI	0
								B-174	c__Bacillio__Lactobacillalesf__Streptococcaceaeg__Streptococcuss__Streptococcus_cristatus		0.000141579		B-73	c__Bacteroidiao__Bacteroidalesf__Bacteroidaceaeg__Bacteroidess__Bacteroides_plebeius		0			B-56	c__Bacteroidiao__Bacteroidalesf__Bacteroidaceaeg__Bacteroidess__Bacteroides_barnesiae	0		B-120	c__Bacteroidiao__Bacteroidalesf__Prevotellaceaeg__Prevotellas__Prevotella_stercorea	0		B-128	c__Bacillio__Lactobacillalesf__Enterococcaceaeg__Enterococcuss__Enterococcus_asini	0		B-27	c__Actinobacteriao__Actinomycetalesf__Corynebacteriaceaeg__Corynebacteriums__Corynebacterium_accolens	0
								B-123	c__Sphingobacteriiao__Sphingobacterialesf__Sphingobacteriaceaeg__Pedobacters__Pedobacter_unclassified		0.000109012		B-75	c__Bacteroidiao__Bacteroidalesf__Bacteroidaceaeg__Bacteroidess__Bacteroides_sp_1_1_30		0			B-60	c__Bacteroidiao__Bacteroidalesf__Bacteroidaceaeg__Bacteroidess__Bacteroides_coprocola	0		B-123	c__Sphingobacteriiao__Sphingobacterialesf__Sphingobacteriaceaeg__Pedobacters__Pedobacter_unclassified	0		B-129	c__Bacillio__Lactobacillalesf__Enterococcaceaeg__Enterococcuss__Enterococcus_avium	0		B-30	c__Actinobacteriao__Bifidobacterialesf__Bifidobacteriaceaeg__Gardnerellas__Gardnerella_vaginalis	0
								B-355	c__Gammaproteobacteriao__Pasteurellalesf__Pasteurellaceaeg__Aggregatibacters__Aggregatibacter_unclassified		0.000104743		B-76	c__Bacteroidiao__Bacteroidalesf__Bacteroidaceaeg__Bacteroidess__Bacteroides_sp_1_1_6		0			B-65	c__Bacteroidiao__Bacteroidalesf__Bacteroidaceaeg__Bacteroidess__Bacteroides_fluxus	0		B-125	c__Bacillio__Lactobacillalesf__Aerococcaceaeg__Abiotrophias__Abiotrophia_defectiva	0		B-131	c__Bacillio__Lactobacillalesf__Enterococcaceaeg__Enterococcuss__Enterococcus_dispar	0		B-36	c__Actinobacteriao__Actinomycetalesf__Micrococcaceaeg__Rothias__Rothia_dentocariosa	0
								B-1	c__Acidobacteriiao__Acidobacterialesf__Acidobacteriaceaeg__Granulicellas__Granulicella_unclassified		0.000103091		B-78	c__Bacteroidiao__Bacteroidalesf__Bacteroidaceaeg__Bacteroidess__Bacteroides_sp_3_2_5		0			B-67	c__Bacteroidiao__Bacteroidalesf__Bacteroidaceaeg__Bacteroidess__Bacteroides_gallinarum	0		B-126	c__Bacillio__Lactobacillalesf__Aerococcaceaeg__Aerococcuss__Aerococcus_viridans	0		B-132	c__Bacillio__Lactobacillalesf__Enterococcaceaeg__Enterococcuss__Enterococcus_durans	0		B-38	c__Actinobacteriao__Actinomycetalesf__Micrococcaceaeg__Rothias__Rothia_unclassified	0
								B-170	c__Bacillio__Bacillalesf__Staphylococcaceaeg__Staphylococcuss__Staphylococcus_hominis		8.52399e-05		B-80	c__Bacteroidiao__Bacteroidalesf__Bacteroidaceaeg__Bacteroidess__Bacteroides_sp_9_1_42FAA		0			B-68	c__Bacteroidiao__Bacteroidalesf__Bacteroidaceaeg__Bacteroidess__Bacteroides_intestinalis	0		B-127	c__Bacillio__Bacillalesf__Bacillaceaeg__Bacilluss__Bacillus_licheniformis	0		B-133	c__Bacillio__Lactobacillalesf__Enterococcaceaeg__Enterococcuss__Enterococcus_faecalis	0		B-39	c__Actinobacteriao__Bifidobacterialesf__Bifidobacteriaceaeg__Scardovias__Scardovia_unclassified	0
								B-168	c__Bacillio__Bacillalesf__Staphylococcaceaeg__Staphylococcuss__Staphylococcus_aureus		8.23027e-05		B-85	c__Bacteroidiao__Bacteroidalesf__Porphyromonadaceaeg__Butyricimonass__Butyricimonas_synergistica		0			B-71	c__Bacteroidiao__Bacteroidalesf__Bacteroidaceaeg__Bacteroidess__Bacteroides_oleiciplenus	0		B-128	c__Bacillio__Lactobacillalesf__Enterococcaceaeg__Enterococcuss__Enterococcus_asini	0		B-134	c__Bacillio__Lactobacillalesf__Enterococcaceaeg__Enterococcuss__Enterococcus_faecium	0		B-40	c__Actinobacteriao__Bifidobacterialesf__Bifidobacteriaceaeg__Scardovias__Scardovia_wiggsiae	0
								B-152	c__Bacillio__Lactobacillalesf__Lactobacillaceaeg__Lactobacilluss__Lactobacillus_mucosae		8.12727e-05		B-88	c__Bacteroidiao__Bacteroidalesf__Porphyromonadaceaeg__Dysgonomonass__Dysgonomonas_mossii		0			B-73	c__Bacteroidiao__Bacteroidalesf__Bacteroidaceaeg__Bacteroidess__Bacteroides_plebeius	0		B-129	c__Bacillio__Lactobacillalesf__Enterococcaceaeg__Enterococcuss__Enterococcus_avium	0		B-135	c__Bacillio__Lactobacillalesf__Enterococcaceaeg__Enterococcuss__Enterococcus_gallinarum	0		B-43	c__Bacteroidetes_nonameo__Bacteroidetes_nonamef__Bacteroidetes_nonameg__Bacteroidetes_nonames__Bacteroidetes_oral_taxon_274	0
								B-365	c__Gammaproteobacteriao__Pasteurellalesf__Pasteurellaceaeg__Haemophiluss__Haemophilus_haemolyticus		7.99715e-05		B-90	c__Bacteroidiao__Bacteroidalesf__Porphyromonadaceaeg__Odoribacters__Odoribacter_laneus		0			B-75	c__Bacteroidiao__Bacteroidalesf__Bacteroidaceaeg__Bacteroidess__Bacteroides_sp_1_1_30	0		B-130	c__Bacillio__Lactobacillalesf__Enterococcaceaeg__Enterococcuss__Enterococcus_casseliflavus	0		B-136	c__Bacillio__Lactobacillalesf__Enterococcaceaeg__Enterococcuss__Enterococcus_hirae	0		B-53	c__Bacteroidiao__Bacteroidalesf__Prevotellaceaeg__Alloprevotellas__Alloprevotella_tannerae	0
								B-370	c__Gammaproteobacteriao__Pasteurellalesf__Pasteurellaceaeg__Haemophiluss__Haemophilus_sputorum		7.51824e-05		B-97	c__Bacteroidiao__Bacteroidalesf__Porphyromonadaceaeg__Parabacteroidess__Parabacteroides_sp_20_3		0			B-76	c__Bacteroidiao__Bacteroidalesf__Bacteroidaceaeg__Bacteroidess__Bacteroides_sp_1_1_6	0		B-131	c__Bacillio__Lactobacillalesf__Enterococcaceaeg__Enterococcuss__Enterococcus_dispar	0		B-137	c__Bacillio__Lactobacillalesf__Enterococcaceaeg__Enterococcuss__Enterococcus_mundtii	0		B-56	c__Bacteroidiao__Bacteroidalesf__Bacteroidaceaeg__Bacteroidess__Bacteroides_barnesiae	0
								B-7	c__Actinobacteriao__Coriobacterialesf__Coriobacteriaceaeg__Adlercreutzias__Adlercreutzia_equolifaciens		7.50995e-05		B-98	c__Bacteroidiao__Bacteroidalesf__Porphyromonadaceaeg__Parabacteroidess__Parabacteroides_sp_D13		0			B-78	c__Bacteroidiao__Bacteroidalesf__Bacteroidaceaeg__Bacteroidess__Bacteroides_sp_3_2_5	0		B-132	c__Bacillio__Lactobacillalesf__Enterococcaceaeg__Enterococcuss__Enterococcus_durans	0		B-138	c__Bacillio__Lactobacillalesf__Aerococcaceaeg__Facklamias__Facklamia_unclassified	0		B-75	c__Bacteroidiao__Bacteroidalesf__Bacteroidaceaeg__Bacteroidess__Bacteroides_sp_1_1_30	0
								B-206	c__Clostridiao__Clostridialesf__Lachnospiraceaeg__Butyrivibrios__Butyrivibrio_unclassified		7.24859e-05		B-106	c__Bacteroidiao__Bacteroidalesf__Porphyromonadaceaeg__Porphyromonass__Porphyromonas_somerae		0			B-79	c__Bacteroidiao__Bacteroidalesf__Bacteroidaceaeg__Bacteroidess__Bacteroides_sp_4_3_47FAA	0		B-133	c__Bacillio__Lactobacillalesf__Enterococcaceaeg__Enterococcuss__Enterococcus_faecalis	0		B-139	c__Bacillio__Bacillalesf__Bacillales_nonameg__Gemellas__Gemella_haemolysans	0		B-78	c__Bacteroidiao__Bacteroidalesf__Bacteroidaceaeg__Bacteroidess__Bacteroides_sp_3_2_5	0
								B-176	c__Bacillio__Lactobacillalesf__Streptococcaceaeg__Streptococcuss__Streptococcus_infantarius		7.24545e-05		B-107	c__Bacteroidiao__Bacteroidalesf__Porphyromonadaceaeg__Porphyromonass__Porphyromonas_uenonis		0			B-80	c__Bacteroidiao__Bacteroidalesf__Bacteroidaceaeg__Bacteroidess__Bacteroides_sp_9_1_42FAA	0		B-134	c__Bacillio__Lactobacillalesf__Enterococcaceaeg__Enterococcuss__Enterococcus_faecium	0		B-140	c__Bacillio__Bacillalesf__Bacillales_nonameg__Gemellas__Gemella_morbillorum	0		B-85	c__Bacteroidiao__Bacteroidalesf__Porphyromonadaceaeg__Butyricimonass__Butyricimonas_synergistica	0
								B-38	c__Actinobacteriao__Actinomycetalesf__Micrococcaceaeg__Rothias__Rothia_unclassified		6.10197e-05		B-108	c__Bacteroidiao__Bacteroidalesf__Prevotellaceaeg__Prevotellas__Prevotella_amnii		0			B-85	c__Bacteroidiao__Bacteroidalesf__Porphyromonadaceaeg__Butyricimonass__Butyricimonas_synergistica	0		B-135	c__Bacillio__Lactobacillalesf__Enterococcaceaeg__Enterococcuss__Enterococcus_gallinarum	0		B-141	c__Bacillio__Lactobacillalesf__Carnobacteriaceaeg__Granulicatellas__Granulicatella_adiacens	0		B-87	c__Bacteroidiao__Bacteroidalesf__Porphyromonadaceaeg__Dysgonomonass__Dysgonomonas_gadei	0
								B-107	c__Bacteroidiao__Bacteroidalesf__Porphyromonadaceaeg__Porphyromonass__Porphyromonas_uenonis		5.15532e-05		B-109	c__Bacteroidiao__Bacteroidalesf__Prevotellaceaeg__Prevotellas__Prevotella_bergensis		0			B-86	c__Bacteroidiao__Bacteroidalesf__Porphyromonadaceaeg__Coprobacters__Coprobacter_fastidiosus	0		B-136	c__Bacillio__Lactobacillalesf__Enterococcaceaeg__Enterococcuss__Enterococcus_hirae	0		B-142	c__Bacillio__Lactobacillalesf__Carnobacteriaceaeg__Granulicatellas__Granulicatella_elegans	0		B-90	c__Bacteroidiao__Bacteroidalesf__Porphyromonadaceaeg__Odoribacters__Odoribacter_laneus	0
								B-131	c__Bacillio__Lactobacillalesf__Enterococcaceaeg__Enterococcuss__Enterococcus_dispar		4.57273e-05		B-111	c__Bacteroidiao__Bacteroidalesf__Prevotellaceaeg__Prevotellas__Prevotella_buccae		0			B-90	c__Bacteroidiao__Bacteroidalesf__Porphyromonadaceaeg__Odoribacters__Odoribacter_laneus	0		B-137	c__Bacillio__Lactobacillalesf__Enterococcaceaeg__Enterococcuss__Enterococcus_mundtii	0		B-145	c__Bacillio__Lactobacillalesf__Lactobacillaceaeg__Lactobacilluss__Lactobacillus_animalis	0		B-97	c__Bacteroidiao__Bacteroidalesf__Porphyromonadaceaeg__Parabacteroidess__Parabacteroides_sp_20_3	0
								B-181	c__Bacillio__Lactobacillalesf__Streptococcaceaeg__Streptococcuss__Streptococcus_mutans		3.91445e-05		B-116	c__Bacteroidiao__Bacteroidalesf__Prevotellaceaeg__Prevotellas__Prevotella_melaninogenica		0			B-97	c__Bacteroidiao__Bacteroidalesf__Porphyromonadaceaeg__Parabacteroidess__Parabacteroides_sp_20_3	0		B-139	c__Bacillio__Bacillalesf__Bacillales_nonameg__Gemellas__Gemella_haemolysans	0		B-146	c__Bacillio__Lactobacillalesf__Lactobacillaceaeg__Lactobacilluss__Lactobacillus_casei_paracasei	0		B-98	c__Bacteroidiao__Bacteroidalesf__Porphyromonadaceaeg__Parabacteroidess__Parabacteroides_sp_D13	0
								B-160	c__Bacillio__Lactobacillalesf__Lactobacillaceaeg__Lactobacilluss__Lactobacillus_sanfranciscensis		3.82727e-05		B-117	c__Bacteroidiao__Bacteroidalesf__Prevotellaceaeg__Prevotellas__Prevotella_nigrescens		0			B-98	c__Bacteroidiao__Bacteroidalesf__Porphyromonadaceaeg__Parabacteroidess__Parabacteroides_sp_D13	0		B-140	c__Bacillio__Bacillalesf__Bacillales_nonameg__Gemellas__Gemella_morbillorum	0		B-147	c__Bacillio__Lactobacillalesf__Lactobacillaceaeg__Lactobacilluss__Lactobacillus_crispatus	0		B-105	c__Bacteroidiao__Bacteroidalesf__Porphyromonadaceaeg__Porphyromonass__Porphyromonas_endodontalis	0
								B-166	c__Bacillio__Lactobacillalesf__Lactobacillaceaeg__Pediococcuss__Pediococcus_pentosaceus		3.7e-05		B-120	c__Bacteroidiao__Bacteroidalesf__Prevotellaceaeg__Prevotellas__Prevotella_stercorea		0			B-105	c__Bacteroidiao__Bacteroidalesf__Porphyromonadaceaeg__Porphyromonass__Porphyromonas_endodontalis	0		B-141	c__Bacillio__Lactobacillalesf__Carnobacteriaceaeg__Granulicatellas__Granulicatella_adiacens	0		B-152	c__Bacillio__Lactobacillalesf__Lactobacillaceaeg__Lactobacilluss__Lactobacillus_mucosae	0		B-106	c__Bacteroidiao__Bacteroidalesf__Porphyromonadaceaeg__Porphyromonass__Porphyromonas_somerae	0
								B-116	c__Bacteroidiao__Bacteroidalesf__Prevotellaceaeg__Prevotellas__Prevotella_melaninogenica		3.18186e-05		B-122	c__Flavobacteriiao__Flavobacterialesf__Flavobacteriaceaeg__Cellulophagas__Cellulophaga_unclassified		0			B-111	c__Bacteroidiao__Bacteroidalesf__Prevotellaceaeg__Prevotellas__Prevotella_buccae	0		B-142	c__Bacillio__Lactobacillalesf__Carnobacteriaceaeg__Granulicatellas__Granulicatella_elegans	0		B-153	c__Bacillio__Lactobacillalesf__Lactobacillaceaeg__Lactobacilluss__Lactobacillus_oris	0		B-108	c__Bacteroidiao__Bacteroidalesf__Prevotellaceaeg__Prevotellas__Prevotella_amnii	0
								B-311	c__Erysipelotrichiao__Erysipelotrichalesf__Erysipelotrichaceaeg__Solobacteriums__Solobacterium_moorei		3.09671e-05		B-123	c__Sphingobacteriiao__Sphingobacterialesf__Sphingobacteriaceaeg__Pedobacters__Pedobacter_unclassified		0			B-114	c__Bacteroidiao__Bacteroidalesf__Prevotellaceaeg__Prevotellas__Prevotella_denticola	0		B-144	c__Bacillio__Lactobacillalesf__Lactobacillaceaeg__Lactobacilluss__Lactobacillus_acidophilus	0		B-156	c__Bacillio__Lactobacillalesf__Lactobacillaceaeg__Lactobacilluss__Lactobacillus_rhamnosus	0		B-111	c__Bacteroidiao__Bacteroidalesf__Prevotellaceaeg__Prevotellas__Prevotella_buccae	0
								B-194	c__Clostridiao__Clostridialesf__Eubacteriaceaeg__Anaerofustiss__Anaerofustis_stercorihominis		3.00909e-05		B-124	c__Deinococcio__Deinococcalesf__Deinococcaceaeg__Deinococcuss__Deinococcus_unclassified		0			B-116	c__Bacteroidiao__Bacteroidalesf__Prevotellaceaeg__Prevotellas__Prevotella_melaninogenica	0		B-145	c__Bacillio__Lactobacillalesf__Lactobacillaceaeg__Lactobacilluss__Lactobacillus_animalis	0		B-157	c__Bacillio__Lactobacillalesf__Lactobacillaceaeg__Lactobacilluss__Lactobacillus_ruminis	0		B-114	c__Bacteroidiao__Bacteroidalesf__Prevotellaceaeg__Prevotellas__Prevotella_denticola	0
								B-334	c__Fusobacteriiao__Fusobacterialesf__Fusobacteriaceaeg__Fusobacteriums__Fusobacterium_periodonticum		2.96173e-05		B-125	c__Bacillio__Lactobacillalesf__Aerococcaceaeg__Abiotrophias__Abiotrophia_defectiva		0			B-117	c__Bacteroidiao__Bacteroidalesf__Prevotellaceaeg__Prevotellas__Prevotella_nigrescens	0		B-147	c__Bacillio__Lactobacillalesf__Lactobacillaceaeg__Lactobacilluss__Lactobacillus_crispatus	0		B-158	c__Bacillio__Lactobacillalesf__Lactobacillaceaeg__Lactobacilluss__Lactobacillus_sakei	0		B-116	c__Bacteroidiao__Bacteroidalesf__Prevotellaceaeg__Prevotellas__Prevotella_melaninogenica	0
								B-124	c__Deinococcio__Deinococcalesf__Deinococcaceaeg__Deinococcuss__Deinococcus_unclassified		2.9e-05		B-126	c__Bacillio__Lactobacillalesf__Aerococcaceaeg__Aerococcuss__Aerococcus_viridans		0			B-118	c__Bacteroidiao__Bacteroidalesf__Prevotellaceaeg__Prevotellas__Prevotella_oralis	0		B-148	c__Bacillio__Lactobacillalesf__Lactobacillaceaeg__Lactobacilluss__Lactobacillus_curvatus	0		B-159	c__Bacillio__Lactobacillalesf__Lactobacillaceaeg__Lactobacilluss__Lactobacillus_salivarius	0		B-117	c__Bacteroidiao__Bacteroidalesf__Prevotellaceaeg__Prevotellas__Prevotella_nigrescens	0
								B-184	c__Bacillio__Lactobacillalesf__Streptococcaceaeg__Streptococcuss__Streptococcus_pseudopneumoniae		2.78182e-05		B-127	c__Bacillio__Bacillalesf__Bacillaceaeg__Bacilluss__Bacillus_licheniformis		0			B-119	c__Bacteroidiao__Bacteroidalesf__Prevotellaceaeg__Prevotellas__Prevotella_oris	0		B-149	c__Bacillio__Lactobacillalesf__Lactobacillaceaeg__Lactobacilluss__Lactobacillus_delbrueckii	0		B-160	c__Bacillio__Lactobacillalesf__Lactobacillaceaeg__Lactobacilluss__Lactobacillus_sanfranciscensis	0		B-118	c__Bacteroidiao__Bacteroidalesf__Prevotellaceaeg__Prevotellas__Prevotella_oralis	0
								B-172	c__Bacillio__Lactobacillalesf__Streptococcaceaeg__Streptococcuss__Streptococcus_anginosus		2.76395e-05		B-128	c__Bacillio__Lactobacillalesf__Enterococcaceaeg__Enterococcuss__Enterococcus_asini		0			B-120	c__Bacteroidiao__Bacteroidalesf__Prevotellaceaeg__Prevotellas__Prevotella_stercorea	0		B-150	c__Bacillio__Lactobacillalesf__Lactobacillaceaeg__Lactobacilluss__Lactobacillus_fermentum	0		B-161	c__Bacillio__Lactobacillalesf__Lactobacillaceaeg__Lactobacilluss__Lactobacillus_vaginalis	0		B-119	c__Bacteroidiao__Bacteroidalesf__Prevotellaceaeg__Prevotellas__Prevotella_oris	0
								B-339	c__Betaproteobacteriao__Neisserialesf__Neisseriaceaeg__Kingellas__Kingella_unclassified		2.64277e-05		B-129	c__Bacillio__Lactobacillalesf__Enterococcaceaeg__Enterococcuss__Enterococcus_avium		0			B-123	c__Sphingobacteriiao__Sphingobacterialesf__Sphingobacteriaceaeg__Pedobacters__Pedobacter_unclassified	0		B-151	c__Bacillio__Lactobacillalesf__Lactobacillaceaeg__Lactobacilluss__Lactobacillus_gasseri	0		B-162	c__Bacillio__Lactobacillalesf__Streptococcaceaeg__Lactococcuss__Lactococcus_garvieae	0		B-123	c__Sphingobacteriiao__Sphingobacterialesf__Sphingobacteriaceaeg__Pedobacters__Pedobacter_unclassified	0
								B-248	c__Clostridiao__Clostridialesf__Clostridiales_Family_XI_Incertae_Sedisg__Finegoldias__Finegoldia_magna		2.54545e-05		B-130	c__Bacillio__Lactobacillalesf__Enterococcaceaeg__Enterococcuss__Enterococcus_casseliflavus		0			B-125	c__Bacillio__Lactobacillalesf__Aerococcaceaeg__Abiotrophias__Abiotrophia_defectiva	0		B-152	c__Bacillio__Lactobacillalesf__Lactobacillaceaeg__Lactobacilluss__Lactobacillus_mucosae	0		B-166	c__Bacillio__Lactobacillalesf__Lactobacillaceaeg__Pediococcuss__Pediococcus_pentosaceus	0		B-125	c__Bacillio__Lactobacillalesf__Aerococcaceaeg__Abiotrophias__Abiotrophia_defectiva	0
								B-326	c__Negativicuteso__Selenomonadalesf__Acidaminococcaceaeg__Phascolarctobacteriums__Phascolarctobacterium_succinatutens		2.25455e-05		B-131	c__Bacillio__Lactobacillalesf__Enterococcaceaeg__Enterococcuss__Enterococcus_dispar		0			B-126	c__Bacillio__Lactobacillalesf__Aerococcaceaeg__Aerococcuss__Aerococcus_viridans	0		B-153	c__Bacillio__Lactobacillalesf__Lactobacillaceaeg__Lactobacilluss__Lactobacillus_oris	0		B-167	c__Bacillio__Lactobacillalesf__Lactobacillaceaeg__Pediococcuss__Pediococcus_unclassified	0		B-127	c__Bacillio__Bacillalesf__Bacillaceaeg__Bacilluss__Bacillus_licheniformis	0
								B-127	c__Bacillio__Bacillalesf__Bacillaceaeg__Bacilluss__Bacillus_licheniformis		1.93636e-05		B-132	c__Bacillio__Lactobacillalesf__Enterococcaceaeg__Enterococcuss__Enterococcus_durans		0			B-127	c__Bacillio__Bacillalesf__Bacillaceaeg__Bacilluss__Bacillus_licheniformis	0		B-154	c__Bacillio__Lactobacillalesf__Lactobacillaceaeg__Lactobacilluss__Lactobacillus_plantarum	0		B-168	c__Bacillio__Bacillalesf__Staphylococcaceaeg__Staphylococcuss__Staphylococcus_aureus	0		B-128	c__Bacillio__Lactobacillalesf__Enterococcaceaeg__Enterococcuss__Enterococcus_asini	0
								B-354	c__Gammaproteobacteriao__Pasteurellalesf__Pasteurellaceaeg__Aggregatibacters__Aggregatibacter_segnis		1.63523e-05		B-133	c__Bacillio__Lactobacillalesf__Enterococcaceaeg__Enterococcuss__Enterococcus_faecalis		0			B-128	c__Bacillio__Lactobacillalesf__Enterococcaceaeg__Enterococcuss__Enterococcus_asini	0		B-155	c__Bacillio__Lactobacillalesf__Lactobacillaceaeg__Lactobacilluss__Lactobacillus_reuteri	0		B-169	c__Bacillio__Bacillalesf__Staphylococcaceaeg__Staphylococcuss__Staphylococcus_epidermidis	0		B-129	c__Bacillio__Lactobacillalesf__Enterococcaceaeg__Enterococcuss__Enterococcus_avium	0
								B-165	c__Bacillio__Lactobacillalesf__Lactobacillaceaeg__Pediococcuss__Pediococcus_lolii		1.15455e-05		B-134	c__Bacillio__Lactobacillalesf__Enterococcaceaeg__Enterococcuss__Enterococcus_faecium		0			B-129	c__Bacillio__Lactobacillalesf__Enterococcaceaeg__Enterococcuss__Enterococcus_avium	0		B-156	c__Bacillio__Lactobacillalesf__Lactobacillaceaeg__Lactobacilluss__Lactobacillus_rhamnosus	0		B-170	c__Bacillio__Bacillalesf__Staphylococcaceaeg__Staphylococcuss__Staphylococcus_hominis	0		B-130	c__Bacillio__Lactobacillalesf__Enterococcaceaeg__Enterococcuss__Enterococcus_casseliflavus	0
								B-193	c__Clostridiao__Clostridialesf__Clostridiales_Family_XI_Incertae_Sedisg__Anaerococcuss__Anaerococcus_vaginalis		9.54789e-06		B-135	c__Bacillio__Lactobacillalesf__Enterococcaceaeg__Enterococcuss__Enterococcus_gallinarum		0			B-131	c__Bacillio__Lactobacillalesf__Enterococcaceaeg__Enterococcuss__Enterococcus_dispar	0		B-157	c__Bacillio__Lactobacillalesf__Lactobacillaceaeg__Lactobacilluss__Lactobacillus_ruminis	0		B-171	c__Bacillio__Lactobacillalesf__Streptococcaceaeg__Streptococcuss__Streptococcus_agalactiae	0		B-131	c__Bacillio__Lactobacillalesf__Enterococcaceaeg__Enterococcuss__Enterococcus_dispar	0
								B-118	c__Bacteroidiao__Bacteroidalesf__Prevotellaceaeg__Prevotellas__Prevotella_oralis		9.27273e-06		B-136	c__Bacillio__Lactobacillalesf__Enterococcaceaeg__Enterococcuss__Enterococcus_hirae		0			B-132	c__Bacillio__Lactobacillalesf__Enterococcaceaeg__Enterococcuss__Enterococcus_durans	0		B-158	c__Bacillio__Lactobacillalesf__Lactobacillaceaeg__Lactobacilluss__Lactobacillus_sakei	0		B-172	c__Bacillio__Lactobacillalesf__Streptococcaceaeg__Streptococcuss__Streptococcus_anginosus	0		B-132	c__Bacillio__Lactobacillalesf__Enterococcaceaeg__Enterococcuss__Enterococcus_durans	0
								B-178	c__Bacillio__Lactobacillalesf__Streptococcaceaeg__Streptococcuss__Streptococcus_intermedius		7.86953e-06		B-137	c__Bacillio__Lactobacillalesf__Enterococcaceaeg__Enterococcuss__Enterococcus_mundtii		0			B-133	c__Bacillio__Lactobacillalesf__Enterococcaceaeg__Enterococcuss__Enterococcus_faecalis	0		B-159	c__Bacillio__Lactobacillalesf__Lactobacillaceaeg__Lactobacilluss__Lactobacillus_salivarius	0		B-173	c__Bacillio__Lactobacillalesf__Streptococcaceaeg__Streptococcuss__Streptococcus_australis	0		B-133	c__Bacillio__Lactobacillalesf__Enterococcaceaeg__Enterococcuss__Enterococcus_faecalis	0
								B-114	c__Bacteroidiao__Bacteroidalesf__Prevotellaceaeg__Prevotellas__Prevotella_denticola		7.64408e-06		B-138	c__Bacillio__Lactobacillalesf__Aerococcaceaeg__Facklamias__Facklamia_unclassified		0			B-134	c__Bacillio__Lactobacillalesf__Enterococcaceaeg__Enterococcuss__Enterococcus_faecium	0		B-160	c__Bacillio__Lactobacillalesf__Lactobacillaceaeg__Lactobacilluss__Lactobacillus_sanfranciscensis	0		B-174	c__Bacillio__Lactobacillalesf__Streptococcaceaeg__Streptococcuss__Streptococcus_cristatus	0		B-136	c__Bacillio__Lactobacillalesf__Enterococcaceaeg__Enterococcuss__Enterococcus_hirae	0
								B-351	c__Epsilonproteobacteriao__Campylobacteralesf__Campylobacteraceaeg__Campylobacters__Campylobacter_ureolyticus		6.27273e-06		B-139	c__Bacillio__Bacillalesf__Bacillales_nonameg__Gemellas__Gemella_haemolysans		0			B-136	c__Bacillio__Lactobacillalesf__Enterococcaceaeg__Enterococcuss__Enterococcus_hirae	0		B-161	c__Bacillio__Lactobacillalesf__Lactobacillaceaeg__Lactobacilluss__Lactobacillus_vaginalis	0		B-175	c__Bacillio__Lactobacillalesf__Streptococcaceaeg__Streptococcuss__Streptococcus_gordonii	0		B-137	c__Bacillio__Lactobacillalesf__Enterococcaceaeg__Enterococcuss__Enterococcus_mundtii	0
								B-85	c__Bacteroidiao__Bacteroidalesf__Porphyromonadaceaeg__Butyricimonass__Butyricimonas_synergistica		5.45455e-06		B-144	c__Bacillio__Lactobacillalesf__Lactobacillaceaeg__Lactobacilluss__Lactobacillus_acidophilus		0			B-137	c__Bacillio__Lactobacillalesf__Enterococcaceaeg__Enterococcuss__Enterococcus_mundtii	0		B-162	c__Bacillio__Lactobacillalesf__Streptococcaceaeg__Lactococcuss__Lactococcus_garvieae	0		B-176	c__Bacillio__Lactobacillalesf__Streptococcaceaeg__Streptococcuss__Streptococcus_infantarius	0		B-138	c__Bacillio__Lactobacillalesf__Aerococcaceaeg__Facklamias__Facklamia_unclassified	0
								B-252	c__Clostridiao__Clostridialesf__Lachnospiraceaeg__Lachnospiraceae_nonames__Lachnospiraceae_bacterium_2_1_46FAA		5.00196e-06		B-145	c__Bacillio__Lactobacillalesf__Lactobacillaceaeg__Lactobacilluss__Lactobacillus_animalis		0			B-138	c__Bacillio__Lactobacillalesf__Aerococcaceaeg__Facklamias__Facklamia_unclassified	0		B-164	c__Bacillio__Lactobacillalesf__Lactobacillaceaeg__Pediococcuss__Pediococcus_acidilactici	0		B-179	c__Bacillio__Lactobacillalesf__Streptococcaceaeg__Streptococcuss__Streptococcus_lutetiensis	0		B-139	c__Bacillio__Bacillalesf__Bacillales_nonameg__Gemellas__Gemella_haemolysans	0
								B-20	c__Actinobacteriao__Actinomycetalesf__Brevibacteriaceaeg__Brevibacteriums__Brevibacterium_mcbrellneri		1.36364e-06		B-147	c__Bacillio__Lactobacillalesf__Lactobacillaceaeg__Lactobacilluss__Lactobacillus_crispatus		0			B-139	c__Bacillio__Bacillalesf__Bacillales_nonameg__Gemellas__Gemella_haemolysans	0		B-165	c__Bacillio__Lactobacillalesf__Lactobacillaceaeg__Pediococcuss__Pediococcus_lolii	0		B-181	c__Bacillio__Lactobacillalesf__Streptococcaceaeg__Streptococcuss__Streptococcus_mutans	0		B-140	c__Bacillio__Bacillalesf__Bacillales_nonameg__Gemellas__Gemella_morbillorum	0
								B-2	c__Actinobacteriao__Actinomycetalesf__Actinomycetaceaeg__Actinobaculums__Actinobaculum_schaalii		0		B-148	c__Bacillio__Lactobacillalesf__Lactobacillaceaeg__Lactobacilluss__Lactobacillus_curvatus		0			B-140	c__Bacillio__Bacillalesf__Bacillales_nonameg__Gemellas__Gemella_morbillorum	0		B-166	c__Bacillio__Lactobacillalesf__Lactobacillaceaeg__Pediococcuss__Pediococcus_pentosaceus	0		B-183	c__Bacillio__Lactobacillalesf__Streptococcaceaeg__Streptococcuss__Streptococcus_peroris	0		B-141	c__Bacillio__Lactobacillalesf__Carnobacteriaceaeg__Granulicatellas__Granulicatella_adiacens	0
								B-3	c__Actinobacteriao__Actinomycetalesf__Actinomycetaceaeg__Actinobaculums__Actinobaculum_unclassified		0		B-150	c__Bacillio__Lactobacillalesf__Lactobacillaceaeg__Lactobacilluss__Lactobacillus_fermentum		0			B-141	c__Bacillio__Lactobacillalesf__Carnobacteriaceaeg__Granulicatellas__Granulicatella_adiacens	0		B-167	c__Bacillio__Lactobacillalesf__Lactobacillaceaeg__Pediococcuss__Pediococcus_unclassified	0		B-184	c__Bacillio__Lactobacillalesf__Streptococcaceaeg__Streptococcuss__Streptococcus_pseudopneumoniae	0		B-142	c__Bacillio__Lactobacillalesf__Carnobacteriaceaeg__Granulicatellas__Granulicatella_elegans	0
								B-4	c__Actinobacteriao__Actinomycetalesf__Actinomycetaceaeg__Actinomycess__Actinomyces_graevenitzii		0		B-152	c__Bacillio__Lactobacillalesf__Lactobacillaceaeg__Lactobacilluss__Lactobacillus_mucosae		0			B-142	c__Bacillio__Lactobacillalesf__Carnobacteriaceaeg__Granulicatellas__Granulicatella_elegans	0		B-168	c__Bacillio__Bacillalesf__Staphylococcaceaeg__Staphylococcuss__Staphylococcus_aureus	0		B-186	c__Bacillio__Lactobacillalesf__Streptococcaceaeg__Streptococcuss__Streptococcus_sanguinis	0		B-144	c__Bacillio__Lactobacillalesf__Lactobacillaceaeg__Lactobacilluss__Lactobacillus_acidophilus	0
								B-5	c__Actinobacteriao__Actinomycetalesf__Actinomycetaceaeg__Actinomycess__Actinomyces_turicensis		0		B-153	c__Bacillio__Lactobacillalesf__Lactobacillaceaeg__Lactobacilluss__Lactobacillus_oris		0			B-144	c__Bacillio__Lactobacillalesf__Lactobacillaceaeg__Lactobacilluss__Lactobacillus_acidophilus	0		B-169	c__Bacillio__Bacillalesf__Staphylococcaceaeg__Staphylococcuss__Staphylococcus_epidermidis	0		B-189	c__Bacillio__Lactobacillalesf__Leuconostocaceaeg__Weissellas__Weissella_cibaria	0		B-145	c__Bacillio__Lactobacillalesf__Lactobacillaceaeg__Lactobacilluss__Lactobacillus_animalis	0
								B-18	c__Actinobacteriao__Bifidobacterialesf__Bifidobacteriaceaeg__Bifidobacteriums__Bifidobacterium_pseudolongum		0		B-154	c__Bacillio__Lactobacillalesf__Lactobacillaceaeg__Lactobacilluss__Lactobacillus_plantarum		0			B-147	c__Bacillio__Lactobacillalesf__Lactobacillaceaeg__Lactobacilluss__Lactobacillus_crispatus	0		B-170	c__Bacillio__Bacillalesf__Staphylococcaceaeg__Staphylococcuss__Staphylococcus_hominis	0		B-190	c__Bacillio__Lactobacillalesf__Leuconostocaceaeg__Weissellas__Weissella_confusa	0		B-147	c__Bacillio__Lactobacillalesf__Lactobacillaceaeg__Lactobacilluss__Lactobacillus_crispatus	0
								B-19	c__Actinobacteriao__Actinomycetalesf__Dermabacteraceaeg__Brachybacteriums__Brachybacterium_unclassified		0		B-155	c__Bacillio__Lactobacillalesf__Lactobacillaceaeg__Lactobacilluss__Lactobacillus_reuteri		0			B-148	c__Bacillio__Lactobacillalesf__Lactobacillaceaeg__Lactobacilluss__Lactobacillus_curvatus	0		B-174	c__Bacillio__Lactobacillalesf__Streptococcaceaeg__Streptococcuss__Streptococcus_cristatus	0		B-191	c__Bacillio__Lactobacillalesf__Leuconostocaceaeg__Weissellas__Weissella_unclassified	0		B-148	c__Bacillio__Lactobacillalesf__Lactobacillaceaeg__Lactobacilluss__Lactobacillus_curvatus	0
								B-27	c__Actinobacteriao__Actinomycetalesf__Corynebacteriaceaeg__Corynebacteriums__Corynebacterium_accolens		0		B-156	c__Bacillio__Lactobacillalesf__Lactobacillaceaeg__Lactobacilluss__Lactobacillus_rhamnosus		0			B-149	c__Bacillio__Lactobacillalesf__Lactobacillaceaeg__Lactobacilluss__Lactobacillus_delbrueckii	0		B-176	c__Bacillio__Lactobacillalesf__Streptococcaceaeg__Streptococcuss__Streptococcus_infantarius	0		B-192	c__Clostridiao__Clostridialesf__Clostridiales_Family_XI_Incertae_Sedisg__Anaerococcuss__Anaerococcus_obesiensis	0		B-149	c__Bacillio__Lactobacillalesf__Lactobacillaceaeg__Lactobacilluss__Lactobacillus_delbrueckii	0
								B-30	c__Actinobacteriao__Bifidobacterialesf__Bifidobacteriaceaeg__Gardnerellas__Gardnerella_vaginalis		0		B-158	c__Bacillio__Lactobacillalesf__Lactobacillaceaeg__Lactobacilluss__Lactobacillus_sakei		0			B-152	c__Bacillio__Lactobacillalesf__Lactobacillaceaeg__Lactobacilluss__Lactobacillus_mucosae	0		B-178	c__Bacillio__Lactobacillalesf__Streptococcaceaeg__Streptococcuss__Streptococcus_intermedius	0		B-193	c__Clostridiao__Clostridialesf__Clostridiales_Family_XI_Incertae_Sedisg__Anaerococcuss__Anaerococcus_vaginalis	0		B-151	c__Bacillio__Lactobacillalesf__Lactobacillaceaeg__Lactobacilluss__Lactobacillus_gasseri	0
								B-31	c__Actinobacteriao__Coriobacterialesf__Coriobacteriaceaeg__Gordonibacters__Gordonibacter_pamelaeae		0		B-159	c__Bacillio__Lactobacillalesf__Lactobacillaceaeg__Lactobacilluss__Lactobacillus_salivarius		0			B-154	c__Bacillio__Lactobacillalesf__Lactobacillaceaeg__Lactobacilluss__Lactobacillus_plantarum	0		B-179	c__Bacillio__Lactobacillalesf__Streptococcaceaeg__Streptococcuss__Streptococcus_lutetiensis	0		B-195	c__Clostridiao__Clostridialesf__Lachnospiraceaeg__Anaerostipess__Anaerostipes_caccae	0		B-152	c__Bacillio__Lactobacillalesf__Lactobacillaceaeg__Lactobacilluss__Lactobacillus_mucosae	0
								B-32	c__Actinobacteriao__Actinomycetalesf__Micrococcaceaeg__Kocurias__Kocuria_unclassified		0		B-160	c__Bacillio__Lactobacillalesf__Lactobacillaceaeg__Lactobacilluss__Lactobacillus_sanfranciscensis		0			B-155	c__Bacillio__Lactobacillalesf__Lactobacillaceaeg__Lactobacilluss__Lactobacillus_reuteri	0		B-181	c__Bacillio__Lactobacillalesf__Streptococcaceaeg__Streptococcuss__Streptococcus_mutans	0		B-200	c__Clostridiao__Clostridialesf__Clostridiales_nonameg__Clostridiales_nonames__Bacteroides_pectinophilus	0		B-153	c__Bacillio__Lactobacillalesf__Lactobacillaceaeg__Lactobacilluss__Lactobacillus_oris	0
								B-33	c__Actinobacteriao__Actinomycetalesf__Micrococcaceaeg__Micrococcuss__Micrococcus_luteus		0		B-161	c__Bacillio__Lactobacillalesf__Lactobacillaceaeg__Lactobacilluss__Lactobacillus_vaginalis		0			B-157	c__Bacillio__Lactobacillalesf__Lactobacillaceaeg__Lactobacilluss__Lactobacillus_ruminis	0		B-183	c__Bacillio__Lactobacillalesf__Streptococcaceaeg__Streptococcuss__Streptococcus_peroris	0		B-201	c__Clostridiao__Clostridialesf__Lachnospiraceaeg__Blautias__Blautia_hansenii	0		B-154	c__Bacillio__Lactobacillalesf__Lactobacillaceaeg__Lactobacilluss__Lactobacillus_plantarum	0
								B-35	c__Actinobacteriao__Actinomycetalesf__Propionibacteriaceaeg__Propionibacteriums__Propionibacterium_granulosum		0		B-162	c__Bacillio__Lactobacillalesf__Streptococcaceaeg__Lactococcuss__Lactococcus_garvieae		0			B-158	c__Bacillio__Lactobacillalesf__Lactobacillaceaeg__Lactobacilluss__Lactobacillus_sakei	0		B-184	c__Bacillio__Lactobacillalesf__Streptococcaceaeg__Streptococcuss__Streptococcus_pseudopneumoniae	0		B-205	c__Clostridiao__Clostridialesf__Lachnospiraceaeg__Butyrivibrios__Butyrivibrio_crossotus	0		B-155	c__Bacillio__Lactobacillalesf__Lactobacillaceaeg__Lactobacilluss__Lactobacillus_reuteri	0
								B-36	c__Actinobacteriao__Actinomycetalesf__Micrococcaceaeg__Rothias__Rothia_dentocariosa		0		B-164	c__Bacillio__Lactobacillalesf__Lactobacillaceaeg__Pediococcuss__Pediococcus_acidilactici		0			B-159	c__Bacillio__Lactobacillalesf__Lactobacillaceaeg__Lactobacilluss__Lactobacillus_salivarius	0		B-189	c__Bacillio__Lactobacillalesf__Leuconostocaceaeg__Weissellas__Weissella_cibaria	0		B-206	c__Clostridiao__Clostridialesf__Lachnospiraceaeg__Butyrivibrios__Butyrivibrio_unclassified	0		B-156	c__Bacillio__Lactobacillalesf__Lactobacillaceaeg__Lactobacilluss__Lactobacillus_rhamnosus	0
								B-41	c__Actinobacteriao__Coriobacterialesf__Coriobacteriaceaeg__Slackias__Slackia_piriformis		0		B-165	c__Bacillio__Lactobacillalesf__Lactobacillaceaeg__Pediococcuss__Pediococcus_lolii		0			B-160	c__Bacillio__Lactobacillalesf__Lactobacillaceaeg__Lactobacilluss__Lactobacillus_sanfranciscensis	0		B-190	c__Bacillio__Lactobacillalesf__Leuconostocaceaeg__Weissellas__Weissella_confusa	0		B-207	c__Clostridiao__Clostridialesf__Lachnospiraceaeg__Cellulosilyticums__Cellulosilyticum_lentocellum	0		B-157	c__Bacillio__Lactobacillalesf__Lactobacillaceaeg__Lactobacilluss__Lactobacillus_ruminis	0
								B-53	c__Bacteroidiao__Bacteroidalesf__Prevotellaceaeg__Alloprevotellas__Alloprevotella_tannerae		0		B-166	c__Bacillio__Lactobacillalesf__Lactobacillaceaeg__Pediococcuss__Pediococcus_pentosaceus		0			B-161	c__Bacillio__Lactobacillalesf__Lactobacillaceaeg__Lactobacilluss__Lactobacillus_vaginalis	0		B-191	c__Bacillio__Lactobacillalesf__Leuconostocaceaeg__Weissellas__Weissella_unclassified	0		B-210	c__Clostridiao__Clostridialesf__Clostridiales_Family_XI_Incertae_Sedisg__Clostridiales_Family_XI_Incertae_Sedis_nonames__Clostridiales_bacterium_BV3C26	0		B-158	c__Bacillio__Lactobacillalesf__Lactobacillaceaeg__Lactobacilluss__Lactobacillus_sakei	0
								B-54	c__Bacteroidiao__Bacteroidalesf__Prevotellaceaeg__Alloprevotellas__Alloprevotella_unclassified		0		B-167	c__Bacillio__Lactobacillalesf__Lactobacillaceaeg__Pediococcuss__Pediococcus_unclassified		0			B-162	c__Bacillio__Lactobacillalesf__Streptococcaceaeg__Lactococcuss__Lactococcus_garvieae	0		B-192	c__Clostridiao__Clostridialesf__Clostridiales_Family_XI_Incertae_Sedisg__Anaerococcuss__Anaerococcus_obesiensis	0		B-214	c__Clostridiao__Clostridialesf__Clostridiaceaeg__Clostridiums__Clostridium_butyricum	0		B-159	c__Bacillio__Lactobacillalesf__Lactobacillaceaeg__Lactobacilluss__Lactobacillus_salivarius	0
								B-56	c__Bacteroidiao__Bacteroidalesf__Bacteroidaceaeg__Bacteroidess__Bacteroides_barnesiae		0		B-168	c__Bacillio__Bacillalesf__Staphylococcaceaeg__Staphylococcuss__Staphylococcus_aureus		0			B-164	c__Bacillio__Lactobacillalesf__Lactobacillaceaeg__Pediococcuss__Pediococcus_acidilactici	0		B-193	c__Clostridiao__Clostridialesf__Clostridiales_Family_XI_Incertae_Sedisg__Anaerococcuss__Anaerococcus_vaginalis	0		B-218	c__Clostridiao__Clostridialesf__Peptostreptococcaceaeg__Peptostreptococcaceae_nonames__Clostridium_glycolicum	0		B-161	c__Bacillio__Lactobacillalesf__Lactobacillaceaeg__Lactobacilluss__Lactobacillus_vaginalis	0
								B-65	c__Bacteroidiao__Bacteroidalesf__Bacteroidaceaeg__Bacteroidess__Bacteroides_fluxus		0		B-169	c__Bacillio__Bacillalesf__Staphylococcaceaeg__Staphylococcuss__Staphylococcus_epidermidis		0			B-165	c__Bacillio__Lactobacillalesf__Lactobacillaceaeg__Pediococcuss__Pediococcus_lolii	0		B-194	c__Clostridiao__Clostridialesf__Eubacteriaceaeg__Anaerofustiss__Anaerofustis_stercorihominis	0		B-220	c__Clostridiao__Clostridialesf__Clostridiaceaeg__Clostridiums__Clostridium_hylemonae	0		B-164	c__Bacillio__Lactobacillalesf__Lactobacillaceaeg__Pediococcuss__Pediococcus_acidilactici	0
								B-78	c__Bacteroidiao__Bacteroidalesf__Bacteroidaceaeg__Bacteroidess__Bacteroides_sp_3_2_5		0		B-170	c__Bacillio__Bacillalesf__Staphylococcaceaeg__Staphylococcuss__Staphylococcus_hominis		0			B-166	c__Bacillio__Lactobacillalesf__Lactobacillaceaeg__Pediococcuss__Pediococcus_pentosaceus	0		B-195	c__Clostridiao__Clostridialesf__Lachnospiraceaeg__Anaerostipess__Anaerostipes_caccae	0		B-223	c__Clostridiao__Clostridialesf__Clostridiaceaeg__Clostridiums__Clostridium_perfringens	0		B-165	c__Bacillio__Lactobacillalesf__Lactobacillaceaeg__Pediococcuss__Pediococcus_lolii	0
								B-80	c__Bacteroidiao__Bacteroidalesf__Bacteroidaceaeg__Bacteroidess__Bacteroides_sp_9_1_42FAA		0		B-171	c__Bacillio__Lactobacillalesf__Streptococcaceaeg__Streptococcuss__Streptococcus_agalactiae		0			B-167	c__Bacillio__Lactobacillalesf__Lactobacillaceaeg__Pediococcuss__Pediococcus_unclassified	0		B-197	c__Clostridiao__Clostridialesf__Lachnospiraceaeg__Anaerostipess__Anaerostipes_unclassified	0		B-225	c__Clostridiao__Clostridialesf__Clostridiaceaeg__Clostridiums__Clostridium_sp_ATCC_BAA_442	0		B-166	c__Bacillio__Lactobacillalesf__Lactobacillaceaeg__Pediococcuss__Pediococcus_pentosaceus	0
								B-87	c__Bacteroidiao__Bacteroidalesf__Porphyromonadaceaeg__Dysgonomonass__Dysgonomonas_gadei		0		B-172	c__Bacillio__Lactobacillalesf__Streptococcaceaeg__Streptococcuss__Streptococcus_anginosus		0			B-168	c__Bacillio__Bacillalesf__Staphylococcaceaeg__Staphylococcuss__Staphylococcus_aureus	0		B-201	c__Clostridiao__Clostridialesf__Lachnospiraceaeg__Blautias__Blautia_hansenii	0		B-226	c__Clostridiao__Clostridialesf__Clostridiaceaeg__Clostridiums__Clostridium_sp_D5	0		B-167	c__Bacillio__Lactobacillalesf__Lactobacillaceaeg__Pediococcuss__Pediococcus_unclassified	0
								B-88	c__Bacteroidiao__Bacteroidalesf__Porphyromonadaceaeg__Dysgonomonass__Dysgonomonas_mossii		0		B-174	c__Bacillio__Lactobacillalesf__Streptococcaceaeg__Streptococcuss__Streptococcus_cristatus		0			B-169	c__Bacillio__Bacillalesf__Staphylococcaceaeg__Staphylococcuss__Staphylococcus_epidermidis	0		B-203	c__Clostridiao__Clostridialesf__Lachnospiraceaeg__Blautias__Blautia_producta	0		B-227	c__Clostridiao__Clostridialesf__Clostridiaceaeg__Clostridiums__Clostridium_sp_KLE_1755	0		B-168	c__Bacillio__Bacillalesf__Staphylococcaceaeg__Staphylococcuss__Staphylococcus_aureus	0
								B-89	c__Bacteroidiao__Bacteroidalesf__Porphyromonadaceaeg__Dysgonomonass__Dysgonomonas_unclassified		0		B-175	c__Bacillio__Lactobacillalesf__Streptococcaceaeg__Streptococcuss__Streptococcus_gordonii		0			B-170	c__Bacillio__Bacillalesf__Staphylococcaceaeg__Staphylococcuss__Staphylococcus_hominis	0		B-204	c__Clostridiao__Clostridialesf__Clostridiaceaeg__Butyricicoccuss__Butyricicoccus_pullicaecorum	0		B-228	c__Clostridiao__Clostridialesf__Clostridiaceaeg__Clostridiums__Clostridium_sp_L2_50	0		B-170	c__Bacillio__Bacillalesf__Staphylococcaceaeg__Staphylococcuss__Staphylococcus_hominis	0
								B-90	c__Bacteroidiao__Bacteroidalesf__Porphyromonadaceaeg__Odoribacters__Odoribacter_laneus		0		B-176	c__Bacillio__Lactobacillalesf__Streptococcaceaeg__Streptococcuss__Streptococcus_infantarius		0			B-171	c__Bacillio__Lactobacillalesf__Streptococcaceaeg__Streptococcuss__Streptococcus_agalactiae	0		B-207	c__Clostridiao__Clostridialesf__Lachnospiraceaeg__Cellulosilyticums__Cellulosilyticum_lentocellum	0		B-229	c__Clostridiao__Clostridialesf__Clostridiaceaeg__Clostridiums__Clostridium_sporogenes	0		B-171	c__Bacillio__Lactobacillalesf__Streptococcaceaeg__Streptococcuss__Streptococcus_agalactiae	0
								B-105	c__Bacteroidiao__Bacteroidalesf__Porphyromonadaceaeg__Porphyromonass__Porphyromonas_endodontalis		0		B-177	c__Bacillio__Lactobacillalesf__Streptococcaceaeg__Streptococcuss__Streptococcus_infantis		0			B-174	c__Bacillio__Lactobacillalesf__Streptococcaceaeg__Streptococcuss__Streptococcus_cristatus	0		B-210	c__Clostridiao__Clostridialesf__Clostridiales_Family_XI_Incertae_Sedisg__Clostridiales_Family_XI_Incertae_Sedis_nonames__Clostridiales_bacterium_BV3C26	0		B-233	c__Clostridiao__Clostridialesf__Lachnospiraceaeg__Coprococcuss__Coprococcus_eutactus	0		B-172	c__Bacillio__Lactobacillalesf__Streptococcaceaeg__Streptococcuss__Streptococcus_anginosus	0
								B-108	c__Bacteroidiao__Bacteroidalesf__Prevotellaceaeg__Prevotellas__Prevotella_amnii		0		B-178	c__Bacillio__Lactobacillalesf__Streptococcaceaeg__Streptococcuss__Streptococcus_intermedius		0			B-178	c__Bacillio__Lactobacillalesf__Streptococcaceaeg__Streptococcuss__Streptococcus_intermedius	0		B-214	c__Clostridiao__Clostridialesf__Clostridiaceaeg__Clostridiums__Clostridium_butyricum	0		B-234	c__Clostridiao__Clostridialesf__Lachnospiraceaeg__Coprococcuss__Coprococcus_sp_ART55_1	0		B-173	c__Bacillio__Lactobacillalesf__Streptococcaceaeg__Streptococcuss__Streptococcus_australis	0
								B-109	c__Bacteroidiao__Bacteroidalesf__Prevotellaceaeg__Prevotellas__Prevotella_bergensis		0		B-179	c__Bacillio__Lactobacillalesf__Streptococcaceaeg__Streptococcuss__Streptococcus_lutetiensis		0			B-183	c__Bacillio__Lactobacillalesf__Streptococcaceaeg__Streptococcuss__Streptococcus_peroris	0		B-217	c__Clostridiao__Clostridialesf__Peptostreptococcaceaeg__Peptostreptococcaceae_nonames__Clostridium_difficile	0		B-241	c__Clostridiao__Clostridialesf__Eubacteriaceaeg__Eubacteriums__Eubacterium_limosum	0		B-174	c__Bacillio__Lactobacillalesf__Streptococcaceaeg__Streptococcuss__Streptococcus_cristatus	0
								B-110	c__Bacteroidiao__Bacteroidalesf__Prevotellaceaeg__Prevotellas__Prevotella_bivia		0		B-183	c__Bacillio__Lactobacillalesf__Streptococcaceaeg__Streptococcuss__Streptococcus_peroris		0			B-184	c__Bacillio__Lactobacillalesf__Streptococcaceaeg__Streptococcuss__Streptococcus_pseudopneumoniae	0		B-218	c__Clostridiao__Clostridialesf__Peptostreptococcaceaeg__Peptostreptococcaceae_nonames__Clostridium_glycolicum	0		B-248	c__Clostridiao__Clostridialesf__Clostridiales_Family_XI_Incertae_Sedisg__Finegoldias__Finegoldia_magna	0		B-175	c__Bacillio__Lactobacillalesf__Streptococcaceaeg__Streptococcuss__Streptococcus_gordonii	0
								B-119	c__Bacteroidiao__Bacteroidalesf__Prevotellaceaeg__Prevotellas__Prevotella_oris		0		B-184	c__Bacillio__Lactobacillalesf__Streptococcaceaeg__Streptococcuss__Streptococcus_pseudopneumoniae		0			B-189	c__Bacillio__Lactobacillalesf__Leuconostocaceaeg__Weissellas__Weissella_cibaria	0		B-220	c__Clostridiao__Clostridialesf__Clostridiaceaeg__Clostridiums__Clostridium_hylemonae	0		B-252	c__Clostridiao__Clostridialesf__Lachnospiraceaeg__Lachnospiraceae_nonames__Lachnospiraceae_bacterium_2_1_46FAA	0		B-176	c__Bacillio__Lactobacillalesf__Streptococcaceaeg__Streptococcuss__Streptococcus_infantarius	0
								B-120	c__Bacteroidiao__Bacteroidalesf__Prevotellaceaeg__Prevotellas__Prevotella_stercorea		0		B-189	c__Bacillio__Lactobacillalesf__Leuconostocaceaeg__Weissellas__Weissella_cibaria		0			B-190	c__Bacillio__Lactobacillalesf__Leuconostocaceaeg__Weissellas__Weissella_confusa	0		B-223	c__Clostridiao__Clostridialesf__Clostridiaceaeg__Clostridiums__Clostridium_perfringens	0		B-256	c__Clostridiao__Clostridialesf__Lachnospiraceaeg__Lachnospiraceae_nonames__Lachnospiraceae_bacterium_4_1_37FAA	0		B-179	c__Bacillio__Lactobacillalesf__Streptococcaceaeg__Streptococcuss__Streptococcus_lutetiensis	0
								B-122	c__Flavobacteriiao__Flavobacterialesf__Flavobacteriaceaeg__Cellulophagas__Cellulophaga_unclassified		0		B-191	c__Bacillio__Lactobacillalesf__Leuconostocaceaeg__Weissellas__Weissella_unclassified		0			B-191	c__Bacillio__Lactobacillalesf__Leuconostocaceaeg__Weissellas__Weissella_unclassified	0		B-226	c__Clostridiao__Clostridialesf__Clostridiaceaeg__Clostridiums__Clostridium_sp_D5	0		B-263	c__Clostridiao__Clostridialesf__Lachnospiraceaeg__Marvinbryantias__Marvinbryantia_formatexigens	0		B-181	c__Bacillio__Lactobacillalesf__Streptococcaceaeg__Streptococcuss__Streptococcus_mutans	0
								B-126	c__Bacillio__Lactobacillalesf__Aerococcaceaeg__Aerococcuss__Aerococcus_viridans		0		B-192	c__Clostridiao__Clostridialesf__Clostridiales_Family_XI_Incertae_Sedisg__Anaerococcuss__Anaerococcus_obesiensis		0			B-192	c__Clostridiao__Clostridialesf__Clostridiales_Family_XI_Incertae_Sedisg__Anaerococcuss__Anaerococcus_obesiensis	0		B-227	c__Clostridiao__Clostridialesf__Clostridiaceaeg__Clostridiums__Clostridium_sp_KLE_1755	0		B-264	c__Clostridiao__Clostridialesf__Oscillospiraceaeg__Oscillibacters__Oscillibacter_sp_KLE_1728	0		B-184	c__Bacillio__Lactobacillalesf__Streptococcaceaeg__Streptococcuss__Streptococcus_pseudopneumoniae	0
								B-138	c__Bacillio__Lactobacillalesf__Aerococcaceaeg__Facklamias__Facklamia_unclassified		0		B-193	c__Clostridiao__Clostridialesf__Clostridiales_Family_XI_Incertae_Sedisg__Anaerococcuss__Anaerococcus_vaginalis		0			B-194	c__Clostridiao__Clostridialesf__Eubacteriaceaeg__Anaerofustiss__Anaerofustis_stercorihominis	0		B-229	c__Clostridiao__Clostridialesf__Clostridiaceaeg__Clostridiums__Clostridium_sporogenes	0		B-267	c__Clostridiao__Clostridialesf__Clostridiales_Family_XI_Incertae_Sedisg__Parvimonass__Parvimonas_micra	0		B-186	c__Bacillio__Lactobacillalesf__Streptococcaceaeg__Streptococcuss__Streptococcus_sanguinis	0
								B-140	c__Bacillio__Bacillalesf__Bacillales_nonameg__Gemellas__Gemella_morbillorum		0		B-200	c__Clostridiao__Clostridialesf__Clostridiales_nonameg__Clostridiales_nonames__Bacteroides_pectinophilus		0			B-200	c__Clostridiao__Clostridialesf__Clostridiales_nonameg__Clostridiales_nonames__Bacteroides_pectinophilus	0		B-238	c__Clostridiao__Clostridialesf__Eubacteriaceaeg__Eubacteriums__Eubacterium_brachy	0		B-268	c__Clostridiao__Clostridialesf__Clostridiales_Family_XI_Incertae_Sedisg__Parvimonass__Parvimonas_unclassified	0		B-189	c__Bacillio__Lactobacillalesf__Leuconostocaceaeg__Weissellas__Weissella_cibaria	0
								B-142	c__Bacillio__Lactobacillalesf__Carnobacteriaceaeg__Granulicatellas__Granulicatella_elegans		0		B-205	c__Clostridiao__Clostridialesf__Lachnospiraceaeg__Butyrivibrios__Butyrivibrio_crossotus		0			B-204	c__Clostridiao__Clostridialesf__Clostridiaceaeg__Butyricicoccuss__Butyricicoccus_pullicaecorum	0		B-241	c__Clostridiao__Clostridialesf__Eubacteriaceaeg__Eubacteriums__Eubacterium_limosum	0		B-269	c__Clostridiao__Clostridialesf__Clostridiales_Family_XI_Incertae_Sedisg__Peptoniphiluss__Peptoniphilus_harei	0		B-191	c__Bacillio__Lactobacillalesf__Leuconostocaceaeg__Weissellas__Weissella_unclassified	0
								B-148	c__Bacillio__Lactobacillalesf__Lactobacillaceaeg__Lactobacilluss__Lactobacillus_curvatus		0		B-206	c__Clostridiao__Clostridialesf__Lachnospiraceaeg__Butyrivibrios__Butyrivibrio_unclassified		0			B-205	c__Clostridiao__Clostridialesf__Lachnospiraceaeg__Butyrivibrios__Butyrivibrio_crossotus	0		B-245	c__Clostridiao__Clostridialesf__Eubacteriaceaeg__Eubacteriums__Eubacterium_sp_3_1_31	0		B-270	c__Clostridiao__Clostridialesf__Clostridiales_Family_XI_Incertae_Sedisg__Peptoniphiluss__Peptoniphilus_lacrimalis	0		B-194	c__Clostridiao__Clostridialesf__Eubacteriaceaeg__Anaerofustiss__Anaerofustis_stercorihominis	0
								B-149	c__Bacillio__Lactobacillalesf__Lactobacillaceaeg__Lactobacilluss__Lactobacillus_delbrueckii		0		B-207	c__Clostridiao__Clostridialesf__Lachnospiraceaeg__Cellulosilyticums__Cellulosilyticum_lentocellum		0			B-210	c__Clostridiao__Clostridialesf__Clostridiales_Family_XI_Incertae_Sedisg__Clostridiales_Family_XI_Incertae_Sedis_nonames__Clostridiales_bacterium_BV3C26	0		B-252	c__Clostridiao__Clostridialesf__Lachnospiraceaeg__Lachnospiraceae_nonames__Lachnospiraceae_bacterium_2_1_46FAA	0		B-272	c__Clostridiao__Clostridialesf__Peptostreptococcaceaeg__Peptostreptococcuss__Peptostreptococcus_anaerobius	0		B-200	c__Clostridiao__Clostridialesf__Clostridiales_nonameg__Clostridiales_nonames__Bacteroides_pectinophilus	0
								B-153	c__Bacillio__Lactobacillalesf__Lactobacillaceaeg__Lactobacilluss__Lactobacillus_oris		0		B-214	c__Clostridiao__Clostridialesf__Clostridiaceaeg__Clostridiums__Clostridium_butyricum		0			B-214	c__Clostridiao__Clostridialesf__Clostridiaceaeg__Clostridiums__Clostridium_butyricum	0		B-256	c__Clostridiao__Clostridialesf__Lachnospiraceaeg__Lachnospiraceae_nonames__Lachnospiraceae_bacterium_4_1_37FAA	0		B-273	c__Clostridiao__Clostridialesf__Peptostreptococcaceaeg__Peptostreptococcuss__Peptostreptococcus_stomatis	0		B-205	c__Clostridiao__Clostridialesf__Lachnospiraceaeg__Butyrivibrios__Butyrivibrio_crossotus	0
								B-155	c__Bacillio__Lactobacillalesf__Lactobacillaceaeg__Lactobacilluss__Lactobacillus_reuteri		0		B-217	c__Clostridiao__Clostridialesf__Peptostreptococcaceaeg__Peptostreptococcaceae_nonames__Clostridium_difficile		0			B-218	c__Clostridiao__Clostridialesf__Peptostreptococcaceaeg__Peptostreptococcaceae_nonames__Clostridium_glycolicum	0		B-259	c__Clostridiao__Clostridialesf__Lachnospiraceaeg__Lachnospiraceae_nonames__Lachnospiraceae_bacterium_6_1_63FAA	0		B-274	c__Clostridiao__Clostridialesf__Peptostreptococcaceaeg__Peptostreptococcuss__Peptostreptococcus_unclassified	0		B-207	c__Clostridiao__Clostridialesf__Lachnospiraceaeg__Cellulosilyticums__Cellulosilyticum_lentocellum	0
								B-157	c__Bacillio__Lactobacillalesf__Lactobacillaceaeg__Lactobacilluss__Lactobacillus_ruminis		0		B-218	c__Clostridiao__Clostridialesf__Peptostreptococcaceaeg__Peptostreptococcaceae_nonames__Clostridium_glycolicum		0			B-223	c__Clostridiao__Clostridialesf__Clostridiaceaeg__Clostridiums__Clostridium_perfringens	0		B-262	c__Clostridiao__Clostridialesf__Lachnospiraceaeg__Lachnospiraceae_nonames__Lachnospiraceae_bacterium_9_1_43BFAA	0		B-284	c__Clostridiao__Clostridialesf__Ruminococcaceaeg__Ruminococcuss__Ruminococcus_champanellensis	0		B-220	c__Clostridiao__Clostridialesf__Clostridiaceaeg__Clostridiums__Clostridium_hylemonae	0
								B-162	c__Bacillio__Lactobacillalesf__Streptococcaceaeg__Lactococcuss__Lactococcus_garvieae		0		B-220	c__Clostridiao__Clostridialesf__Clostridiaceaeg__Clostridiums__Clostridium_hylemonae		0			B-225	c__Clostridiao__Clostridialesf__Clostridiaceaeg__Clostridiums__Clostridium_sp_ATCC_BAA_442	0		B-263	c__Clostridiao__Clostridialesf__Lachnospiraceaeg__Marvinbryantias__Marvinbryantia_formatexigens	0		B-285	c__Clostridiao__Clostridialesf__Ruminococcaceaeg__Ruminococcuss__Ruminococcus_flavefaciens	0		B-228	c__Clostridiao__Clostridialesf__Clostridiaceaeg__Clostridiums__Clostridium_sp_L2_50	0
								B-169	c__Bacillio__Bacillalesf__Staphylococcaceaeg__Staphylococcuss__Staphylococcus_epidermidis		0		B-223	c__Clostridiao__Clostridialesf__Clostridiaceaeg__Clostridiums__Clostridium_perfringens		0			B-226	c__Clostridiao__Clostridialesf__Clostridiaceaeg__Clostridiums__Clostridium_sp_D5	0		B-267	c__Clostridiao__Clostridialesf__Clostridiales_Family_XI_Incertae_Sedisg__Parvimonass__Parvimonas_micra	0		B-291	c__Clostridiao__Clostridialesf__Ruminococcaceaeg__Subdoligranulums__Subdoligranulum_sp_4_3_54A2FAA	0		B-229	c__Clostridiao__Clostridialesf__Clostridiaceaeg__Clostridiums__Clostridium_sporogenes	0
								B-171	c__Bacillio__Lactobacillalesf__Streptococcaceaeg__Streptococcuss__Streptococcus_agalactiae		0		B-225	c__Clostridiao__Clostridialesf__Clostridiaceaeg__Clostridiums__Clostridium_sp_ATCC_BAA_442		0			B-227	c__Clostridiao__Clostridialesf__Clostridiaceaeg__Clostridiums__Clostridium_sp_KLE_1755	0		B-268	c__Clostridiao__Clostridialesf__Clostridiales_Family_XI_Incertae_Sedisg__Parvimonass__Parvimonas_unclassified	0		B-293	c__Clostridiao__Clostridialesf__Ruminococcaceaeg__Subdoligranulums__Subdoligranulum_variabile	0		B-233	c__Clostridiao__Clostridialesf__Lachnospiraceaeg__Coprococcuss__Coprococcus_eutactus	0
								B-183	c__Bacillio__Lactobacillalesf__Streptococcaceaeg__Streptococcuss__Streptococcus_peroris		0		B-226	c__Clostridiao__Clostridialesf__Clostridiaceaeg__Clostridiums__Clostridium_sp_D5		0			B-228	c__Clostridiao__Clostridialesf__Clostridiaceaeg__Clostridiums__Clostridium_sp_L2_50	0		B-273	c__Clostridiao__Clostridialesf__Peptostreptococcaceaeg__Peptostreptococcuss__Peptostreptococcus_stomatis	0		B-294	c__Erysipelotrichiao__Erysipelotrichalesf__Erysipelotrichaceaeg__Catenibacteriums__Catenibacterium_mitsuokai	0		B-238	c__Clostridiao__Clostridialesf__Eubacteriaceaeg__Eubacteriums__Eubacterium_brachy	0
								B-190	c__Bacillio__Lactobacillalesf__Leuconostocaceaeg__Weissellas__Weissella_confusa		0		B-228	c__Clostridiao__Clostridialesf__Clostridiaceaeg__Clostridiums__Clostridium_sp_L2_50		0			B-229	c__Clostridiao__Clostridialesf__Clostridiaceaeg__Clostridiums__Clostridium_sporogenes	0		B-274	c__Clostridiao__Clostridialesf__Peptostreptococcaceaeg__Peptostreptococcuss__Peptostreptococcus_unclassified	0		B-295	c__Erysipelotrichiao__Erysipelotrichalesf__Erysipelotrichaceaeg__Erysipelotrichaceae_nonames__Clostridium_innocuum	0		B-241	c__Clostridiao__Clostridialesf__Eubacteriaceaeg__Eubacteriums__Eubacterium_limosum	0
								B-192	c__Clostridiao__Clostridialesf__Clostridiales_Family_XI_Incertae_Sedisg__Anaerococcuss__Anaerococcus_obesiensis		0		B-229	c__Clostridiao__Clostridialesf__Clostridiaceaeg__Clostridiums__Clostridium_sporogenes		0			B-238	c__Clostridiao__Clostridialesf__Eubacteriaceaeg__Eubacteriums__Eubacterium_brachy	0		B-294	c__Erysipelotrichiao__Erysipelotrichalesf__Erysipelotrichaceaeg__Catenibacteriums__Catenibacterium_mitsuokai	0		B-297	c__Erysipelotrichiao__Erysipelotrichalesf__Erysipelotrichaceaeg__Erysipelotrichaceae_nonames__Clostridium_spiroforme	0		B-252	c__Clostridiao__Clostridialesf__Lachnospiraceaeg__Lachnospiraceae_nonames__Lachnospiraceae_bacterium_2_1_46FAA	0
								B-200	c__Clostridiao__Clostridialesf__Clostridiales_nonameg__Clostridiales_nonames__Bacteroides_pectinophilus		0		B-233	c__Clostridiao__Clostridialesf__Lachnospiraceaeg__Coprococcuss__Coprococcus_eutactus		0			B-256	c__Clostridiao__Clostridialesf__Lachnospiraceaeg__Lachnospiraceae_nonames__Lachnospiraceae_bacterium_4_1_37FAA	0		B-296	c__Erysipelotrichiao__Erysipelotrichalesf__Erysipelotrichaceaeg__Erysipelotrichaceae_nonames__Clostridium_ramosum	0		B-298	c__Erysipelotrichiao__Erysipelotrichalesf__Erysipelotrichaceaeg__Coprobacilluss__Coprobacillus_sp_29_1	0		B-256	c__Clostridiao__Clostridialesf__Lachnospiraceaeg__Lachnospiraceae_nonames__Lachnospiraceae_bacterium_4_1_37FAA	0
								B-205	c__Clostridiao__Clostridialesf__Lachnospiraceaeg__Butyrivibrios__Butyrivibrio_crossotus		0		B-234	c__Clostridiao__Clostridialesf__Lachnospiraceaeg__Coprococcuss__Coprococcus_sp_ART55_1		0			B-267	c__Clostridiao__Clostridialesf__Clostridiales_Family_XI_Incertae_Sedisg__Parvimonass__Parvimonas_micra	0		B-297	c__Erysipelotrichiao__Erysipelotrichalesf__Erysipelotrichaceaeg__Erysipelotrichaceae_nonames__Clostridium_spiroforme	0		B-299	c__Erysipelotrichiao__Erysipelotrichalesf__Erysipelotrichaceaeg__Coprobacilluss__Coprobacillus_sp_D6	0		B-263	c__Clostridiao__Clostridialesf__Lachnospiraceaeg__Marvinbryantias__Marvinbryantia_formatexigens	0
								B-207	c__Clostridiao__Clostridialesf__Lachnospiraceaeg__Cellulosilyticums__Cellulosilyticum_lentocellum		0		B-241	c__Clostridiao__Clostridialesf__Eubacteriaceaeg__Eubacteriums__Eubacterium_limosum		0			B-269	c__Clostridiao__Clostridialesf__Clostridiales_Family_XI_Incertae_Sedisg__Peptoniphiluss__Peptoniphilus_harei	0		B-303	c__Erysipelotrichiao__Erysipelotrichalesf__Erysipelotrichaceaeg__Erysipelotrichaceae_nonames__Erysipelotrichaceae_bacterium_3_1_53	0		B-303	c__Erysipelotrichiao__Erysipelotrichalesf__Erysipelotrichaceaeg__Erysipelotrichaceae_nonames__Erysipelotrichaceae_bacterium_3_1_53	0		B-267	c__Clostridiao__Clostridialesf__Clostridiales_Family_XI_Incertae_Sedisg__Parvimonass__Parvimonas_micra	0
								B-210	c__Clostridiao__Clostridialesf__Clostridiales_Family_XI_Incertae_Sedisg__Clostridiales_Family_XI_Incertae_Sedis_nonames__Clostridiales_bacterium_BV3C26		0		B-248	c__Clostridiao__Clostridialesf__Clostridiales_Family_XI_Incertae_Sedisg__Finegoldias__Finegoldia_magna		0			B-270	c__Clostridiao__Clostridialesf__Clostridiales_Family_XI_Incertae_Sedisg__Peptoniphiluss__Peptoniphilus_lacrimalis	0		B-304	c__Erysipelotrichiao__Erysipelotrichalesf__Erysipelotrichaceaeg__Erysipelotrichaceae_nonames__Erysipelotrichaceae_bacterium_5_2_54FAA	0		B-307	c__Erysipelotrichiao__Erysipelotrichalesf__Erysipelotrichaceaeg__Erysipelotrichaceae_nonames__Eubacterium_cylindroides	0		B-273	c__Clostridiao__Clostridialesf__Peptostreptococcaceaeg__Peptostreptococcuss__Peptostreptococcus_stomatis	0
								B-220	c__Clostridiao__Clostridialesf__Clostridiaceaeg__Clostridiums__Clostridium_hylemonae		0		B-252	c__Clostridiao__Clostridialesf__Lachnospiraceaeg__Lachnospiraceae_nonames__Lachnospiraceae_bacterium_2_1_46FAA		0			B-273	c__Clostridiao__Clostridialesf__Peptostreptococcaceaeg__Peptostreptococcuss__Peptostreptococcus_stomatis	0		B-308	c__Erysipelotrichiao__Erysipelotrichalesf__Erysipelotrichaceaeg__Erysipelotrichaceae_nonames__Eubacterium_dolichum	0		B-311	c__Erysipelotrichiao__Erysipelotrichalesf__Erysipelotrichaceaeg__Solobacteriums__Solobacterium_moorei	0		B-284	c__Clostridiao__Clostridialesf__Ruminococcaceaeg__Ruminococcuss__Ruminococcus_champanellensis	0
								B-226	c__Clostridiao__Clostridialesf__Clostridiaceaeg__Clostridiums__Clostridium_sp_D5		0		B-263	c__Clostridiao__Clostridialesf__Lachnospiraceaeg__Marvinbryantias__Marvinbryantia_formatexigens		0			B-274	c__Clostridiao__Clostridialesf__Peptostreptococcaceaeg__Peptostreptococcuss__Peptostreptococcus_unclassified	0		B-311	c__Erysipelotrichiao__Erysipelotrichalesf__Erysipelotrichaceaeg__Solobacteriums__Solobacterium_moorei	0		B-312	c__Erysipelotrichiao__Erysipelotrichalesf__Erysipelotrichaceaeg__Turicibacters__Turicibacter_sanguinis	0		B-293	c__Clostridiao__Clostridialesf__Ruminococcaceaeg__Subdoligranulums__Subdoligranulum_variabile	0
								B-228	c__Clostridiao__Clostridialesf__Clostridiaceaeg__Clostridiums__Clostridium_sp_L2_50		0		B-284	c__Clostridiao__Clostridialesf__Ruminococcaceaeg__Ruminococcuss__Ruminococcus_champanellensis		0			B-284	c__Clostridiao__Clostridialesf__Ruminococcaceaeg__Ruminococcuss__Ruminococcus_champanellensis	0		B-314	c__Negativicuteso__Selenomonadalesf__Acidaminococcaceaeg__Acidaminococcuss__Acidaminococcus_intestini	0		B-313	c__Erysipelotrichiao__Erysipelotrichalesf__Erysipelotrichaceaeg__Turicibacters__Turicibacter_unclassified	0		B-294	c__Erysipelotrichiao__Erysipelotrichalesf__Erysipelotrichaceaeg__Catenibacteriums__Catenibacterium_mitsuokai	0
								B-233	c__Clostridiao__Clostridialesf__Lachnospiraceaeg__Coprococcuss__Coprococcus_eutactus		0		B-285	c__Clostridiao__Clostridialesf__Ruminococcaceaeg__Ruminococcuss__Ruminococcus_flavefaciens		0			B-293	c__Clostridiao__Clostridialesf__Ruminococcaceaeg__Subdoligranulums__Subdoligranulum_variabile	0		B-316	c__Negativicuteso__Selenomonadalesf__Veillonellaceaeg__Anaeroglobuss__Anaeroglobus_geminatus	0		B-316	c__Negativicuteso__Selenomonadalesf__Veillonellaceaeg__Anaeroglobuss__Anaeroglobus_geminatus	0		B-297	c__Erysipelotrichiao__Erysipelotrichalesf__Erysipelotrichaceaeg__Erysipelotrichaceae_nonames__Clostridium_spiroforme	0
								B-238	c__Clostridiao__Clostridialesf__Eubacteriaceaeg__Eubacteriums__Eubacterium_brachy		0		B-293	c__Clostridiao__Clostridialesf__Ruminococcaceaeg__Subdoligranulums__Subdoligranulum_variabile		0			B-298	c__Erysipelotrichiao__Erysipelotrichalesf__Erysipelotrichaceaeg__Coprobacilluss__Coprobacillus_sp_29_1	0		B-319	c__Negativicuteso__Selenomonadalesf__Veillonellaceaeg__Megamonass__Megamonas_funiformis	0		B-318	c__Negativicuteso__Selenomonadalesf__Veillonellaceaeg__Dialisters__Dialister_micraerophilus	0		B-299	c__Erysipelotrichiao__Erysipelotrichalesf__Erysipelotrichaceaeg__Coprobacilluss__Coprobacillus_sp_D6	0
								B-241	c__Clostridiao__Clostridialesf__Eubacteriaceaeg__Eubacteriums__Eubacterium_limosum		0		B-294	c__Erysipelotrichiao__Erysipelotrichalesf__Erysipelotrichaceaeg__Catenibacteriums__Catenibacterium_mitsuokai		0			B-299	c__Erysipelotrichiao__Erysipelotrichalesf__Erysipelotrichaceaeg__Coprobacilluss__Coprobacillus_sp_D6	0		B-330	c__Negativicuteso__Selenomonadalesf__Veillonellaceaeg__Veillonellas__Veillonella_ratti	0		B-332	c__Fusobacteriiao__Fusobacterialesf__Fusobacteriaceaeg__Fusobacteriums__Fusobacterium_mortiferum	0		B-303	c__Erysipelotrichiao__Erysipelotrichalesf__Erysipelotrichaceaeg__Erysipelotrichaceae_nonames__Erysipelotrichaceae_bacterium_3_1_53	0
								B-263	c__Clostridiao__Clostridialesf__Lachnospiraceaeg__Marvinbryantias__Marvinbryantia_formatexigens		0		B-299	c__Erysipelotrichiao__Erysipelotrichalesf__Erysipelotrichaceaeg__Coprobacilluss__Coprobacillus_sp_D6		0			B-307	c__Erysipelotrichiao__Erysipelotrichalesf__Erysipelotrichaceaeg__Erysipelotrichaceae_nonames__Eubacterium_cylindroides	0		B-334	c__Fusobacteriiao__Fusobacterialesf__Fusobacteriaceaeg__Fusobacteriums__Fusobacterium_periodonticum	0		B-334	c__Fusobacteriiao__Fusobacterialesf__Fusobacteriaceaeg__Fusobacteriums__Fusobacterium_periodonticum	0		B-306	c__Erysipelotrichiao__Erysipelotrichalesf__Erysipelotrichaceaeg__Erysipelotrichaceae_nonames__Eubacterium_biforme	0
								B-267	c__Clostridiao__Clostridialesf__Clostridiales_Family_XI_Incertae_Sedisg__Parvimonass__Parvimonas_micra		0		B-306	c__Erysipelotrichiao__Erysipelotrichalesf__Erysipelotrichaceaeg__Erysipelotrichaceae_nonames__Eubacterium_biforme		0			B-311	c__Erysipelotrichiao__Erysipelotrichalesf__Erysipelotrichaceaeg__Solobacteriums__Solobacterium_moorei	0		B-335	c__Fusobacteriiao__Fusobacterialesf__Fusobacteriaceaeg__Fusobacteriums__Fusobacterium_ulcerans	0		B-335	c__Fusobacteriiao__Fusobacterialesf__Fusobacteriaceaeg__Fusobacteriums__Fusobacterium_ulcerans	0		B-307	c__Erysipelotrichiao__Erysipelotrichalesf__Erysipelotrichaceaeg__Erysipelotrichaceae_nonames__Eubacterium_cylindroides	0
								B-268	c__Clostridiao__Clostridialesf__Clostridiales_Family_XI_Incertae_Sedisg__Parvimonass__Parvimonas_unclassified		0		B-307	c__Erysipelotrichiao__Erysipelotrichalesf__Erysipelotrichaceaeg__Erysipelotrichaceae_nonames__Eubacterium_cylindroides		0			B-316	c__Negativicuteso__Selenomonadalesf__Veillonellaceaeg__Anaeroglobuss__Anaeroglobus_geminatus	0		B-339	c__Betaproteobacteriao__Neisserialesf__Neisseriaceaeg__Kingellas__Kingella_unclassified	0		B-338	c__Betaproteobacteriao__Burkholderialesf__Comamonadaceaeg__Comamonass__Comamonas_unclassified	0		B-311	c__Erysipelotrichiao__Erysipelotrichalesf__Erysipelotrichaceaeg__Solobacteriums__Solobacterium_moorei	0
								B-269	c__Clostridiao__Clostridialesf__Clostridiales_Family_XI_Incertae_Sedisg__Peptoniphiluss__Peptoniphilus_harei		0		B-316	c__Negativicuteso__Selenomonadalesf__Veillonellaceaeg__Anaeroglobuss__Anaeroglobus_geminatus		0			B-318	c__Negativicuteso__Selenomonadalesf__Veillonellaceaeg__Dialisters__Dialister_micraerophilus	0		B-349	c__Epsilonproteobacteriao__Campylobacteralesf__Campylobacteraceaeg__Campylobacters__Campylobacter_gracilis	0		B-339	c__Betaproteobacteriao__Neisserialesf__Neisseriaceaeg__Kingellas__Kingella_unclassified	0		B-312	c__Erysipelotrichiao__Erysipelotrichalesf__Erysipelotrichaceaeg__Turicibacters__Turicibacter_sanguinis	0
								B-270	c__Clostridiao__Clostridialesf__Clostridiales_Family_XI_Incertae_Sedisg__Peptoniphiluss__Peptoniphilus_lacrimalis		0		B-319	c__Negativicuteso__Selenomonadalesf__Veillonellaceaeg__Megamonass__Megamonas_funiformis		0			B-330	c__Negativicuteso__Selenomonadalesf__Veillonellaceaeg__Veillonellas__Veillonella_ratti	0		B-352	c__Gammaproteobacteriao__Pseudomonadalesf__Moraxellaceaeg__Acinetobacters__Acinetobacter_lwoffii	0		B-340	c__Betaproteobacteriao__Neisserialesf__Neisseriaceaeg__Neisserias__Neisseria_unclassified	0		B-316	c__Negativicuteso__Selenomonadalesf__Veillonellaceaeg__Anaeroglobuss__Anaeroglobus_geminatus	0
								B-273	c__Clostridiao__Clostridialesf__Peptostreptococcaceaeg__Peptostreptococcuss__Peptostreptococcus_stomatis		0		B-320	c__Negativicuteso__Selenomonadalesf__Veillonellaceaeg__Megamonass__Megamonas_hypermegale		0			B-332	c__Fusobacteriiao__Fusobacterialesf__Fusobacteriaceaeg__Fusobacteriums__Fusobacterium_mortiferum	0		B-354	c__Gammaproteobacteriao__Pasteurellalesf__Pasteurellaceaeg__Aggregatibacters__Aggregatibacter_segnis	0		B-341	c__Betaproteobacteriao__Burkholderialesf__Oxalobacteraceaeg__Oxalobacters__Oxalobacter_formigenes	0		B-318	c__Negativicuteso__Selenomonadalesf__Veillonellaceaeg__Dialisters__Dialister_micraerophilus	0
								B-274	c__Clostridiao__Clostridialesf__Peptostreptococcaceaeg__Peptostreptococcuss__Peptostreptococcus_unclassified		0		B-321	c__Negativicuteso__Selenomonadalesf__Veillonellaceaeg__Megamonass__Megamonas_rupellensis		0			B-334	c__Fusobacteriiao__Fusobacterialesf__Fusobacteriaceaeg__Fusobacteriums__Fusobacterium_periodonticum	0		B-355	c__Gammaproteobacteriao__Pasteurellalesf__Pasteurellaceaeg__Aggregatibacters__Aggregatibacter_unclassified	0		B-348	c__Epsilonproteobacteriao__Campylobacteralesf__Campylobacteraceaeg__Campylobacters__Campylobacter_concisus	0		B-323	c__Negativicuteso__Selenomonadalesf__Veillonellaceaeg__Megasphaeras__Megasphaera_micronuciformis	0
								B-284	c__Clostridiao__Clostridialesf__Ruminococcaceaeg__Ruminococcuss__Ruminococcus_champanellensis		0		B-323	c__Negativicuteso__Selenomonadalesf__Veillonellaceaeg__Megasphaeras__Megasphaera_micronuciformis		0			B-335	c__Fusobacteriiao__Fusobacterialesf__Fusobacteriaceaeg__Fusobacteriums__Fusobacterium_ulcerans	0		B-356	c__Gammaproteobacteriao__Enterobacterialesf__Enterobacteriaceaeg__Citrobacters__Citrobacter_freundii	0		B-349	c__Epsilonproteobacteriao__Campylobacteralesf__Campylobacteraceaeg__Campylobacters__Campylobacter_gracilis	0		B-324	c__Negativicuteso__Selenomonadalesf__Veillonellaceaeg__Megasphaeras__Megasphaera_unclassified	0
								B-293	c__Clostridiao__Clostridialesf__Ruminococcaceaeg__Subdoligranulums__Subdoligranulum_variabile		0		B-326	c__Negativicuteso__Selenomonadalesf__Acidaminococcaceaeg__Phascolarctobacteriums__Phascolarctobacterium_succinatutens		0			B-336	c__Betaproteobacteriao__Burkholderialesf__Burkholderiaceaeg__Burkholderias__Burkholderia_unclassified	0		B-357	c__Gammaproteobacteriao__Enterobacterialesf__Enterobacteriaceaeg__Citrobacters__Citrobacter_unclassified	0		B-350	c__Epsilonproteobacteriao__Campylobacteralesf__Campylobacteraceaeg__Campylobacters__Campylobacter_hominis	0		B-326	c__Negativicuteso__Selenomonadalesf__Acidaminococcaceaeg__Phascolarctobacteriums__Phascolarctobacterium_succinatutens	0
								B-297	c__Erysipelotrichiao__Erysipelotrichalesf__Erysipelotrichaceaeg__Erysipelotrichaceae_nonames__Clostridium_spiroforme		0		B-330	c__Negativicuteso__Selenomonadalesf__Veillonellaceaeg__Veillonellas__Veillonella_ratti		0			B-338	c__Betaproteobacteriao__Burkholderialesf__Comamonadaceaeg__Comamonass__Comamonas_unclassified	0		B-360	c__Gammaproteobacteriao__Enterobacterialesf__Enterobacteriaceaeg__Enterobacteriaceae_nonames__Enterobacteriaceae_bacterium_9_2_54FAA	0		B-351	c__Epsilonproteobacteriao__Campylobacteralesf__Campylobacteraceaeg__Campylobacters__Campylobacter_ureolyticus	0		B-332	c__Fusobacteriiao__Fusobacterialesf__Fusobacteriaceaeg__Fusobacteriums__Fusobacterium_mortiferum	0
								B-299	c__Erysipelotrichiao__Erysipelotrichalesf__Erysipelotrichaceaeg__Coprobacilluss__Coprobacillus_sp_D6		0		B-332	c__Fusobacteriiao__Fusobacterialesf__Fusobacteriaceaeg__Fusobacteriums__Fusobacterium_mortiferum		0			B-339	c__Betaproteobacteriao__Neisserialesf__Neisseriaceaeg__Kingellas__Kingella_unclassified	0		B-363	c__Gammaproteobacteriao__Enterobacterialesf__Enterobacteriaceaeg__Escherichias__Escherichia_sp_TW09276	0		B-352	c__Gammaproteobacteriao__Pseudomonadalesf__Moraxellaceaeg__Acinetobacters__Acinetobacter_lwoffii	0		B-335	c__Fusobacteriiao__Fusobacterialesf__Fusobacteriaceaeg__Fusobacteriums__Fusobacterium_ulcerans	0
								B-307	c__Erysipelotrichiao__Erysipelotrichalesf__Erysipelotrichaceaeg__Erysipelotrichaceae_nonames__Eubacterium_cylindroides		0		B-334	c__Fusobacteriiao__Fusobacterialesf__Fusobacteriaceaeg__Fusobacteriums__Fusobacterium_periodonticum		0			B-340	c__Betaproteobacteriao__Neisserialesf__Neisseriaceaeg__Neisserias__Neisseria_unclassified	0		B-365	c__Gammaproteobacteriao__Pasteurellalesf__Pasteurellaceaeg__Haemophiluss__Haemophilus_haemolyticus	0		B-353	c__Gammaproteobacteriao__Pasteurellalesf__Pasteurellaceaeg__Actinobacilluss__Actinobacillus_unclassified	0		B-338	c__Betaproteobacteriao__Burkholderialesf__Comamonadaceaeg__Comamonass__Comamonas_unclassified	0
								B-308	c__Erysipelotrichiao__Erysipelotrichalesf__Erysipelotrichaceaeg__Erysipelotrichaceae_nonames__Eubacterium_dolichum		0		B-335	c__Fusobacteriiao__Fusobacterialesf__Fusobacteriaceaeg__Fusobacteriums__Fusobacterium_ulcerans		0			B-349	c__Epsilonproteobacteriao__Campylobacteralesf__Campylobacteraceaeg__Campylobacters__Campylobacter_gracilis	0		B-366	c__Gammaproteobacteriao__Pasteurellalesf__Pasteurellaceaeg__Haemophiluss__Haemophilus_influenzae	0		B-354	c__Gammaproteobacteriao__Pasteurellalesf__Pasteurellaceaeg__Aggregatibacters__Aggregatibacter_segnis	0		B-339	c__Betaproteobacteriao__Neisserialesf__Neisseriaceaeg__Kingellas__Kingella_unclassified	0
								B-318	c__Negativicuteso__Selenomonadalesf__Veillonellaceaeg__Dialisters__Dialister_micraerophilus		0		B-336	c__Betaproteobacteriao__Burkholderialesf__Burkholderiaceaeg__Burkholderias__Burkholderia_unclassified		0			B-351	c__Epsilonproteobacteriao__Campylobacteralesf__Campylobacteraceaeg__Campylobacters__Campylobacter_ureolyticus	0		B-368	c__Gammaproteobacteriao__Pasteurellalesf__Pasteurellaceaeg__Haemophiluss__Haemophilus_paraphrohaemolyticus	0		B-355	c__Gammaproteobacteriao__Pasteurellalesf__Pasteurellaceaeg__Aggregatibacters__Aggregatibacter_unclassified	0		B-347	c__Deltaproteobacteriao__Desulfovibrionalesf__Desulfovibrionaceaeg__Desulfovibrios__Desulfovibrio_piger	0
								B-319	c__Negativicuteso__Selenomonadalesf__Veillonellaceaeg__Megamonass__Megamonas_funiformis		0		B-338	c__Betaproteobacteriao__Burkholderialesf__Comamonadaceaeg__Comamonass__Comamonas_unclassified		0			B-352	c__Gammaproteobacteriao__Pseudomonadalesf__Moraxellaceaeg__Acinetobacters__Acinetobacter_lwoffii	0		B-369	c__Gammaproteobacteriao__Pasteurellalesf__Pasteurellaceaeg__Haemophiluss__Haemophilus_pittmaniae	0		B-358	c__Gammaproteobacteriao__Enterobacterialesf__Enterobacteriaceaeg__Enterobacters__Enterobacter_aerogenes	0		B-349	c__Epsilonproteobacteriao__Campylobacteralesf__Campylobacteraceaeg__Campylobacters__Campylobacter_gracilis	0
								B-320	c__Negativicuteso__Selenomonadalesf__Veillonellaceaeg__Megamonass__Megamonas_hypermegale		0		B-339	c__Betaproteobacteriao__Neisserialesf__Neisseriaceaeg__Kingellas__Kingella_unclassified		0			B-358	c__Gammaproteobacteriao__Enterobacterialesf__Enterobacteriaceaeg__Enterobacters__Enterobacter_aerogenes	0		B-370	c__Gammaproteobacteriao__Pasteurellalesf__Pasteurellaceaeg__Haemophiluss__Haemophilus_sputorum	0		B-360	c__Gammaproteobacteriao__Enterobacterialesf__Enterobacteriaceaeg__Enterobacteriaceae_nonames__Enterobacteriaceae_bacterium_9_2_54FAA	0		B-351	c__Epsilonproteobacteriao__Campylobacteralesf__Campylobacteraceaeg__Campylobacters__Campylobacter_ureolyticus	0
								B-321	c__Negativicuteso__Selenomonadalesf__Veillonellaceaeg__Megamonass__Megamonas_rupellensis		0		B-340	c__Betaproteobacteriao__Neisserialesf__Neisseriaceaeg__Neisserias__Neisseria_unclassified		0			B-360	c__Gammaproteobacteriao__Enterobacterialesf__Enterobacteriaceaeg__Enterobacteriaceae_nonames__Enterobacteriaceae_bacterium_9_2_54FAA	0		B-371	c__Gammaproteobacteriao__Enterobacterialesf__Enterobacteriaceaeg__Hafnias__Hafnia_alvei	0		B-361	c__Gammaproteobacteriao__Enterobacterialesf__Enterobacteriaceaeg__Escherichias__Escherichia_albertii	0		B-360	c__Gammaproteobacteriao__Enterobacterialesf__Enterobacteriaceaeg__Enterobacteriaceae_nonames__Enterobacteriaceae_bacterium_9_2_54FAA	0
								B-338	c__Betaproteobacteriao__Burkholderialesf__Comamonadaceaeg__Comamonass__Comamonas_unclassified		0		B-348	c__Epsilonproteobacteriao__Campylobacteralesf__Campylobacteraceaeg__Campylobacters__Campylobacter_concisus		0			B-361	c__Gammaproteobacteriao__Enterobacterialesf__Enterobacteriaceaeg__Escherichias__Escherichia_albertii	0		B-375	c__Gammaproteobacteriao__Enterobacterialesf__Enterobacteriaceaeg__Morganellas__Morganella_morganii	0		B-365	c__Gammaproteobacteriao__Pasteurellalesf__Pasteurellaceaeg__Haemophiluss__Haemophilus_haemolyticus	0		B-363	c__Gammaproteobacteriao__Enterobacterialesf__Enterobacteriaceaeg__Escherichias__Escherichia_sp_TW09276	0
								B-350	c__Epsilonproteobacteriao__Campylobacteralesf__Campylobacteraceaeg__Campylobacters__Campylobacter_hominis		0		B-349	c__Epsilonproteobacteriao__Campylobacteralesf__Campylobacteraceaeg__Campylobacters__Campylobacter_gracilis		0			B-363	c__Gammaproteobacteriao__Enterobacterialesf__Enterobacteriaceaeg__Escherichias__Escherichia_sp_TW09276	0		B-376	c__Gammaproteobacteriao__Enterobacterialesf__Enterobacteriaceaeg__Pantoeas__Pantoea_ananatis	0		B-366	c__Gammaproteobacteriao__Pasteurellalesf__Pasteurellaceaeg__Haemophiluss__Haemophilus_influenzae	0		B-365	c__Gammaproteobacteriao__Pasteurellalesf__Pasteurellaceaeg__Haemophiluss__Haemophilus_haemolyticus	0
								B-352	c__Gammaproteobacteriao__Pseudomonadalesf__Moraxellaceaeg__Acinetobacters__Acinetobacter_lwoffii		0		B-350	c__Epsilonproteobacteriao__Campylobacteralesf__Campylobacteraceaeg__Campylobacters__Campylobacter_hominis		0			B-365	c__Gammaproteobacteriao__Pasteurellalesf__Pasteurellaceaeg__Haemophiluss__Haemophilus_haemolyticus	0		B-377	c__Gammaproteobacteriao__Enterobacterialesf__Enterobacteriaceaeg__Pantoeas__Pantoea_unclassified	0		B-368	c__Gammaproteobacteriao__Pasteurellalesf__Pasteurellaceaeg__Haemophiluss__Haemophilus_paraphrohaemolyticus	0		B-366	c__Gammaproteobacteriao__Pasteurellalesf__Pasteurellaceaeg__Haemophiluss__Haemophilus_influenzae	0
								B-358	c__Gammaproteobacteriao__Enterobacterialesf__Enterobacteriaceaeg__Enterobacters__Enterobacter_aerogenes		0		B-352	c__Gammaproteobacteriao__Pseudomonadalesf__Moraxellaceaeg__Acinetobacters__Acinetobacter_lwoffii		0			B-366	c__Gammaproteobacteriao__Pasteurellalesf__Pasteurellaceaeg__Haemophiluss__Haemophilus_influenzae	0		B-378	c__Gammaproteobacteriao__Enterobacterialesf__Enterobacteriaceaeg__Proteuss__Proteus_mirabilis	0		B-370	c__Gammaproteobacteriao__Pasteurellalesf__Pasteurellaceaeg__Haemophiluss__Haemophilus_sputorum	0		B-368	c__Gammaproteobacteriao__Pasteurellalesf__Pasteurellaceaeg__Haemophiluss__Haemophilus_paraphrohaemolyticus	0
								B-360	c__Gammaproteobacteriao__Enterobacterialesf__Enterobacteriaceaeg__Enterobacteriaceae_nonames__Enterobacteriaceae_bacterium_9_2_54FAA		0		B-358	c__Gammaproteobacteriao__Enterobacterialesf__Enterobacteriaceaeg__Enterobacters__Enterobacter_aerogenes		0			B-368	c__Gammaproteobacteriao__Pasteurellalesf__Pasteurellaceaeg__Haemophiluss__Haemophilus_paraphrohaemolyticus	0		B-379	c__Gammaproteobacteriao__Enterobacterialesf__Enterobacteriaceaeg__Proteuss__Proteus_penneri	0		B-371	c__Gammaproteobacteriao__Enterobacterialesf__Enterobacteriaceaeg__Hafnias__Hafnia_alvei	0		B-370	c__Gammaproteobacteriao__Pasteurellalesf__Pasteurellaceaeg__Haemophiluss__Haemophilus_sputorum	0
								B-361	c__Gammaproteobacteriao__Enterobacterialesf__Enterobacteriaceaeg__Escherichias__Escherichia_albertii		0		B-361	c__Gammaproteobacteriao__Enterobacterialesf__Enterobacteriaceaeg__Escherichias__Escherichia_albertii		0			B-369	c__Gammaproteobacteriao__Pasteurellalesf__Pasteurellaceaeg__Haemophiluss__Haemophilus_pittmaniae	0		B-380	c__Gammaproteobacteriao__Enterobacterialesf__Enterobacteriaceaeg__Proteuss__Proteus_unclassified	0		B-372	c__Gammaproteobacteriao__Enterobacterialesf__Enterobacteriaceaeg__Klebsiellas__Klebsiella_oxytoca	0		B-371	c__Gammaproteobacteriao__Enterobacterialesf__Enterobacteriaceaeg__Hafnias__Hafnia_alvei	0
								B-363	c__Gammaproteobacteriao__Enterobacterialesf__Enterobacteriaceaeg__Escherichias__Escherichia_sp_TW09276		0		B-363	c__Gammaproteobacteriao__Enterobacterialesf__Enterobacteriaceaeg__Escherichias__Escherichia_sp_TW09276		0			B-370	c__Gammaproteobacteriao__Pasteurellalesf__Pasteurellaceaeg__Haemophiluss__Haemophilus_sputorum	0		B-381	c__Gammaproteobacteriao__Enterobacterialesf__Enterobacteriaceaeg__Providencias__Providencia_unclassified	0		B-375	c__Gammaproteobacteriao__Enterobacterialesf__Enterobacteriaceaeg__Morganellas__Morganella_morganii	0		B-372	c__Gammaproteobacteriao__Enterobacterialesf__Enterobacteriaceaeg__Klebsiellas__Klebsiella_oxytoca	0
								B-366	c__Gammaproteobacteriao__Pasteurellalesf__Pasteurellaceaeg__Haemophiluss__Haemophilus_influenzae		0		B-369	c__Gammaproteobacteriao__Pasteurellalesf__Pasteurellaceaeg__Haemophiluss__Haemophilus_pittmaniae		0			B-371	c__Gammaproteobacteriao__Enterobacterialesf__Enterobacteriaceaeg__Hafnias__Hafnia_alvei	0		B-382	c__Gammaproteobacteriao__Pseudomonadalesf__Pseudomonadaceaeg__Pseudomonass__Pseudomonas_aeruginosa	0		B-376	c__Gammaproteobacteriao__Enterobacterialesf__Enterobacteriaceaeg__Pantoeas__Pantoea_ananatis	0		B-376	c__Gammaproteobacteriao__Enterobacterialesf__Enterobacteriaceaeg__Pantoeas__Pantoea_ananatis	0
								B-368	c__Gammaproteobacteriao__Pasteurellalesf__Pasteurellaceaeg__Haemophiluss__Haemophilus_paraphrohaemolyticus		0		B-376	c__Gammaproteobacteriao__Enterobacterialesf__Enterobacteriaceaeg__Pantoeas__Pantoea_ananatis		0			B-379	c__Gammaproteobacteriao__Enterobacterialesf__Enterobacteriaceaeg__Proteuss__Proteus_penneri	0		B-383	c__Gammaproteobacteriao__Pseudomonadalesf__Pseudomonadaceaeg__Pseudomonass__Pseudomonas_mendocina	0		B-379	c__Gammaproteobacteriao__Enterobacterialesf__Enterobacteriaceaeg__Proteuss__Proteus_penneri	0		B-379	c__Gammaproteobacteriao__Enterobacterialesf__Enterobacteriaceaeg__Proteuss__Proteus_penneri	0
								B-369	c__Gammaproteobacteriao__Pasteurellalesf__Pasteurellaceaeg__Haemophiluss__Haemophilus_pittmaniae		0		B-381	c__Gammaproteobacteriao__Enterobacterialesf__Enterobacteriaceaeg__Providencias__Providencia_unclassified		0			B-381	c__Gammaproteobacteriao__Enterobacterialesf__Enterobacteriaceaeg__Providencias__Providencia_unclassified	0		B-384	c__Gammaproteobacteriao__Pseudomonadalesf__Pseudomonadaceaeg__Pseudomonass__Pseudomonas_unclassified	0		B-381	c__Gammaproteobacteriao__Enterobacterialesf__Enterobacteriaceaeg__Providencias__Providencia_unclassified	0		B-380	c__Gammaproteobacteriao__Enterobacterialesf__Enterobacteriaceaeg__Proteuss__Proteus_unclassified	0
								B-371	c__Gammaproteobacteriao__Enterobacterialesf__Enterobacteriaceaeg__Hafnias__Hafnia_alvei		0		B-382	c__Gammaproteobacteriao__Pseudomonadalesf__Pseudomonadaceaeg__Pseudomonass__Pseudomonas_aeruginosa		0			B-382	c__Gammaproteobacteriao__Pseudomonadalesf__Pseudomonadaceaeg__Pseudomonass__Pseudomonas_aeruginosa	0		B-385	c__Gammaproteobacteriao__Enterobacterialesf__Enterobacteriaceaeg__Shigellas__Shigella_flexneri	0		B-382	c__Gammaproteobacteriao__Pseudomonadalesf__Pseudomonadaceaeg__Pseudomonass__Pseudomonas_aeruginosa	0		B-381	c__Gammaproteobacteriao__Enterobacterialesf__Enterobacteriaceaeg__Providencias__Providencia_unclassified	0
								B-376	c__Gammaproteobacteriao__Enterobacterialesf__Enterobacteriaceaeg__Pantoeas__Pantoea_ananatis		0		B-386	c__Gammaproteobacteriao__Enterobacterialesf__Enterobacteriaceaeg__Shigellas__Shigella_sonnei		0			B-383	c__Gammaproteobacteriao__Pseudomonadalesf__Pseudomonadaceaeg__Pseudomonass__Pseudomonas_mendocina	0		B-386	c__Gammaproteobacteriao__Enterobacterialesf__Enterobacteriaceaeg__Shigellas__Shigella_sonnei	0		B-383	c__Gammaproteobacteriao__Pseudomonadalesf__Pseudomonadaceaeg__Pseudomonass__Pseudomonas_mendocina	0		B-383	c__Gammaproteobacteriao__Pseudomonadalesf__Pseudomonadaceaeg__Pseudomonass__Pseudomonas_mendocina	0
								B-382	c__Gammaproteobacteriao__Pseudomonadalesf__Pseudomonadaceaeg__Pseudomonass__Pseudomonas_aeruginosa		0		B-387	c__Spirochaetiao__Spirochaetalesf__Brachyspiraceaeg__Brachyspiras__Brachyspira_pilosicoli		0			B-386	c__Gammaproteobacteriao__Enterobacterialesf__Enterobacteriaceaeg__Shigellas__Shigella_sonnei	0		B-387	c__Spirochaetiao__Spirochaetalesf__Brachyspiraceaeg__Brachyspiras__Brachyspira_pilosicoli	0		B-385	c__Gammaproteobacteriao__Enterobacterialesf__Enterobacteriaceaeg__Shigellas__Shigella_flexneri	0		B-387	c__Spirochaetiao__Spirochaetalesf__Brachyspiraceaeg__Brachyspiras__Brachyspira_pilosicoli	0
								B-385	c__Gammaproteobacteriao__Enterobacterialesf__Enterobacteriaceaeg__Shigellas__Shigella_flexneri		0		B-388	c__Spirochaetiao__Spirochaetalesf__Brachyspiraceaeg__Brachyspiras__Brachyspira_unclassified		0			B-387	c__Spirochaetiao__Spirochaetalesf__Brachyspiraceaeg__Brachyspiras__Brachyspira_pilosicoli	0		B-388	c__Spirochaetiao__Spirochaetalesf__Brachyspiraceaeg__Brachyspiras__Brachyspira_unclassified	0		B-386	c__Gammaproteobacteriao__Enterobacterialesf__Enterobacteriaceaeg__Shigellas__Shigella_sonnei	0		B-388	c__Spirochaetiao__Spirochaetalesf__Brachyspiraceaeg__Brachyspiras__Brachyspira_unclassified	0
								B-389	c__Spirochaetiao__Spirochaetalesf__Spirochaetaceaeg__Treponemas__Treponema_lecithinolyticum		0		B-389	c__Spirochaetiao__Spirochaetalesf__Spirochaetaceaeg__Treponemas__Treponema_lecithinolyticum		0			B-388	c__Spirochaetiao__Spirochaetalesf__Brachyspiraceaeg__Brachyspiras__Brachyspira_unclassified	0		B-389	c__Spirochaetiao__Spirochaetalesf__Spirochaetaceaeg__Treponemas__Treponema_lecithinolyticum	0		B-387	c__Spirochaetiao__Spirochaetalesf__Brachyspiraceaeg__Brachyspiras__Brachyspira_pilosicoli	0		B-389	c__Spirochaetiao__Spirochaetalesf__Spirochaetaceaeg__Treponemas__Treponema_lecithinolyticum	0
								B-390	c__Synergistiao__Synergistalesf__Synergistaceaeg__Fretibacteriums__Fretibacterium_fastidiosum		0		B-390	c__Synergistiao__Synergistalesf__Synergistaceaeg__Fretibacteriums__Fretibacterium_fastidiosum		0			B-389	c__Spirochaetiao__Spirochaetalesf__Spirochaetaceaeg__Treponemas__Treponema_lecithinolyticum	0		B-390	c__Synergistiao__Synergistalesf__Synergistaceaeg__Fretibacteriums__Fretibacterium_fastidiosum	0		B-388	c__Spirochaetiao__Spirochaetalesf__Brachyspiraceaeg__Brachyspiras__Brachyspira_unclassified	0		B-390	c__Synergistiao__Synergistalesf__Synergistaceaeg__Fretibacteriums__Fretibacterium_fastidiosum	0
								B-391	c__Synergistiao__Synergistalesf__Synergistaceaeg__Jonquetellas__Jonquetella_anthropi		0		B-391	c__Synergistiao__Synergistalesf__Synergistaceaeg__Jonquetellas__Jonquetella_anthropi		0			B-390	c__Synergistiao__Synergistalesf__Synergistaceaeg__Fretibacteriums__Fretibacterium_fastidiosum	0		B-391	c__Synergistiao__Synergistalesf__Synergistaceaeg__Jonquetellas__Jonquetella_anthropi	0		B-391	c__Synergistiao__Synergistalesf__Synergistaceaeg__Jonquetellas__Jonquetella_anthropi	0		B-391	c__Synergistiao__Synergistalesf__Synergistaceaeg__Jonquetellas__Jonquetella_anthropi	0

## Sheet: Table S10_MAX-V species
Table S10:	Mean abundance sorting for diagnosis the most common viral species in the groups.										Group :	CDM				Group :	CDF				Group :	NONF					Group :	NONM					Group :	UCM				Group :	UCF
											S O R T I N G					S O R T I N G					S O R T I N G						S O R T I N G						S O R T I N G					S O R T I N G
										VIRUS-type		TAXA	Percentage			VIRUS-type	TAXA	Percentage			VIRUS-type		TAXA	Percentage			VIRUS-type		TAXA	Percentage			VIRUS-type	TAXA	Percentage			VIRUS-type	TAXA	Percentage
VIRUS-species Types with			MAX.	frequency average percentage							V-301	Viruses|dsDNA viruses, no RNA stage|Caudovirales|Siphoviridae|Unclassified|Unclassified|Bacteroides phage B124-14	17.2391			V-567	Viruses|unclassified bacterial viruses|Unclassified|Unclassified|Unclassified|Unclassified|uncultured crAssphage	27.4384			V-567		Viruses|unclassified bacterial viruses|Unclassified|Unclassified|Unclassified|Unclassified|uncultured crAssphage	27.227			V-567		Viruses|unclassified bacterial viruses|Unclassified|Unclassified|Unclassified|Unclassified|uncultured crAssphage	41.2153			V-543	Viruses|ssDNA viruses|Unclassified|unclassified Microviridae|Unclassified|Unclassified|Parabacteroides phage YZ-2015b	11.9275			V-567	Viruses|unclassified bacterial viruses|Unclassified|Unclassified|Unclassified|Unclassified|uncultured crAssphage	27.3619
						in the Group:					V-567	Viruses|unclassified bacterial viruses|Unclassified|Unclassified|Unclassified|Unclassified|uncultured crAssphage	13.7262			V-543	Viruses|ssDNA viruses|Unclassified|unclassified Microviridae|Unclassified|Unclassified|Parabacteroides phage YZ-2015b	23.6646			V-278		Viruses|dsDNA viruses, no RNA stage|Caudovirales|Siphoviridae|Unclassified|Sfi21dt1virus|Streptococcus virus phiAbc2	7.16765			V-543		Viruses|ssDNA viruses|Unclassified|unclassified Microviridae|Unclassified|Unclassified|Parabacteroides phage YZ-2015b	13.9532			V-520	Viruses|dsDNA viruses, no RNA stage|Unclassified|Poxviridae|unclassified Chordopoxvirinae|Unclassified|BeAn 58058 virus	9.51622			V-543	Viruses|ssDNA viruses|Unclassified|unclassified Microviridae|Unclassified|Unclassified|Parabacteroides phage YZ-2015b	11.2888
											V-278	Viruses|dsDNA viruses, no RNA stage|Caudovirales|Siphoviridae|Unclassified|Sfi21dt1virus|Streptococcus virus phiAbc2	9.23866			V-278	Viruses|dsDNA viruses, no RNA stage|Caudovirales|Siphoviridae|Unclassified|Sfi21dt1virus|Streptococcus virus phiAbc2	5.04478			V-543		Viruses|ssDNA viruses|Unclassified|unclassified Microviridae|Unclassified|Unclassified|Parabacteroides phage YZ-2015b	6.13577			V-301		Viruses|dsDNA viruses, no RNA stage|Caudovirales|Siphoviridae|Unclassified|Unclassified|Bacteroides phage B124-14	6.52564			V-301	Viruses|dsDNA viruses, no RNA stage|Caudovirales|Siphoviridae|Unclassified|Unclassified|Bacteroides phage B124-14	9.36365			V-301	Viruses|dsDNA viruses, no RNA stage|Caudovirales|Siphoviridae|Unclassified|Unclassified|Bacteroides phage B124-14	8.72272
		VIRUS-type		TAXA	Percentage						V-543	Viruses|ssDNA viruses|Unclassified|unclassified Microviridae|Unclassified|Unclassified|Parabacteroides phage YZ-2015b	5.70924			V-301	Viruses|dsDNA viruses, no RNA stage|Caudovirales|Siphoviridae|Unclassified|Unclassified|Bacteroides phage B124-14	4.45989			V-542		Viruses|ssDNA viruses|Unclassified|unclassified Microviridae|Unclassified|Unclassified|Parabacteroides phage YZ-2015a	5.05094			V-278		Viruses|dsDNA viruses, no RNA stage|Caudovirales|Siphoviridae|Unclassified|Sfi21dt1virus|Streptococcus virus phiAbc2	4.91047			V-278	Viruses|dsDNA viruses, no RNA stage|Caudovirales|Siphoviridae|Unclassified|Sfi21dt1virus|Streptococcus virus phiAbc2	7.23295			V-278	Viruses|dsDNA viruses, no RNA stage|Caudovirales|Siphoviridae|Unclassified|Sfi21dt1virus|Streptococcus virus phiAbc2	7.39538
		V-301		Viruses|dsDNA viruses, no RNA stage|Caudovirales|Siphoviridae|Unclassified|Unclassified|Bacteroides phage B124-14	17.2391		CDM				V-556	Viruses|unclassified bacterial viruses|Unclassified|Unclassified|Unclassified|Unclassified|Streptococcus phage 20617	2.92153			V-466	Viruses|dsDNA viruses, no RNA stage|Caudovirales|Siphoviridae|Unclassified|Unclassified|Stx2-converting phage 1717	2.29692			V-301		Viruses|dsDNA viruses, no RNA stage|Caudovirales|Siphoviridae|Unclassified|Unclassified|Bacteroides phage B124-14	4.67692			V-542		Viruses|ssDNA viruses|Unclassified|unclassified Microviridae|Unclassified|Unclassified|Parabacteroides phage YZ-2015a	3.86792			V-567	Viruses|unclassified bacterial viruses|Unclassified|Unclassified|Unclassified|Unclassified|uncultured crAssphage	6.44445			V-302	Viruses|dsDNA viruses, no RNA stage|Caudovirales|Siphoviridae|Unclassified|Unclassified|Bacteroides phage B40-8	1.99787
		V-567		Viruses|unclassified bacterial viruses|Unclassified|Unclassified|Unclassified|Unclassified|uncultured crAssphage	13.7262						V-146	Viruses|dsDNA viruses, no RNA stage|Caudovirales|Myoviridae|Unclassified|Unclassified|Shigella phage SfIV	2.38596			V-332	Viruses|dsDNA viruses, no RNA stage|Caudovirales|Siphoviridae|Unclassified|Unclassified|Enterobacteria phage mEp460	1.89365			V-140		Viruses|dsDNA viruses, no RNA stage|Caudovirales|Myoviridae|Unclassified|Unclassified|Salmonella phage RE-2010	3.47899			V-137		Viruses|dsDNA viruses, no RNA stage|Caudovirales|Myoviridae|Unclassified|Unclassified|Pseudomonas phage phi3	2.85894			V-556	Viruses|unclassified bacterial viruses|Unclassified|Unclassified|Unclassified|Unclassified|Streptococcus phage 20617	3.87607			V-520	Viruses|dsDNA viruses, no RNA stage|Unclassified|Poxviridae|unclassified Chordopoxvirinae|Unclassified|BeAn 58058 virus	1.71729
		V-278		Viruses|dsDNA viruses, no RNA stage|Caudovirales|Siphoviridae|Unclassified|Sfi21dt1virus|Streptococcus virus phiAbc2	9.23866						V-302	Viruses|dsDNA viruses, no RNA stage|Caudovirales|Siphoviridae|Unclassified|Unclassified|Bacteroides phage B40-8	2.24393			V-542	Viruses|ssDNA viruses|Unclassified|unclassified Microviridae|Unclassified|Unclassified|Parabacteroides phage YZ-2015a	1.82429			V-466		Viruses|dsDNA viruses, no RNA stage|Caudovirales|Siphoviridae|Unclassified|Unclassified|Stx2-converting phage 1717	3.12927			V-381		Viruses|dsDNA viruses, no RNA stage|Caudovirales|Siphoviridae|Unclassified|Unclassified|Lactococcus phage 340	1.48179			V-240	Viruses|dsDNA viruses, no RNA stage|Caudovirales|Siphoviridae|Unclassified|C2virus|Lactococcus virus c2	3.66456			V-189	Viruses|dsDNA viruses, no RNA stage|Caudovirales|Podoviridae|Unclassified|unclassified Epsilon15likevirus|Escherichia phage TL-2011b	1.58566
											V-222	Viruses|dsDNA viruses, no RNA stage|Caudovirales|Siphoviridae|Guernseyvirinae|K1gvirus|Escherichia phage K1-dep(4)	2.12162			V-11	Viruses|dsDNA viruses, no RNA stage|Caudovirales|Myoviridae|Peduovirinae|P2virus|Enterobacteria phage P4	1.58859			V-417		Viruses|dsDNA viruses, no RNA stage|Caudovirales|Siphoviridae|Unclassified|Unclassified|Mycobacterium phage BuzzLyseyear	2.75347			V-461		Viruses|dsDNA viruses, no RNA stage|Caudovirales|Siphoviridae|Unclassified|Unclassified|Streptococcus phage YMC-2011	1.20257			V-234	Viruses|dsDNA viruses, no RNA stage|Caudovirales|Siphoviridae|Unclassified|C2likevirus|Lactococcus phage bIL67	3.05596			V-127	Viruses|dsDNA viruses, no RNA stage|Caudovirales|Myoviridae|Unclassified|Unclassified|Lactobacillus phage LfeInf	1.57495
[truncated: 561 more rows]

## Sheet: Table S11-max-V family
Table S11:	Mean abundance sorting for diagnosis the most abundant viral family in the groups.								Group :	CDM					Group :	CDF					Group :	NONF					Group :	NONM					Group :	UCM					Group :	UCF
[truncated: 48 more rows]

[truncated: 2 more sheets: Table S12-MAX-Fungi, Table S13-Archaea]
